# Supplementary material for: Gas-phase structures of sterically crowded disilanes studied by electron diffraction and quantum chemical methods: 1,1,2,2-tetrakis(trimethylsilyl)disilane and 1,1,2,2-tetrakis(trimethylsilyl)dimethyldisilane
Source: Royal Society of Chemistry journal article supplement (doi:10.1039/c4dt00628c), 2014-01-01

**Gas-phase structures of sterically crowded disilanes studied by electron diffraction and quantum chemical methods: 1,1,2,2-tetrakis(trimethylsilyl)disilane and 1,1,2,2-tetrakis(trimethylsilyl)dimethyldisilane**

Jan Schwabedissen, Paul D. Lane, Sarah L. Masters, Karl Hassler and Derek A. Wann

**Table S1** Experimental parameters from the GED analyses of **1** and **2**.

|                                     | <b>1</b> |         | <b>2</b> |         |
|-------------------------------------|----------|---------|----------|---------|
| Nozzle-to-film distance / mm        | 251.5    | 91.3    | 248.7    | 89.0    |
| $T_{\text{nozzle}}$ / K             | 431      | 464     | 466      | 480     |
| $T_{\text{sample}}$ / K             | 412      | 443     | 431      | 448     |
| $\Delta s$ / nm <sup>-1</sup>       | 1        | 2       | 1        | 2       |
| $s_{\text{min}}$ / nm <sup>-1</sup> | 20       | 80      | 20       | 80      |
| $sw_1$ / nm <sup>-1</sup>           | 40       | 100     | 40       | 100     |
| $sw_2$ / nm <sup>-1</sup>           | 129      | 310     | 129      | 310     |
| $s_{\text{max}}$ / nm <sup>-1</sup> | 150      | 340     | 150      | 360     |
| Correlation parameter               | 0.432    | 0.364   | 0.479    | 0.472   |
| Scale factor ( $k$ )                | 2.20(2)  | 2.40(3) | 2.37(3)  | 3.09(4) |
| Electron wavelength / pm            | 6.18     | 6.18    | 6.18     | 6.18    |

**Table S2** Least-squares correlation matrix ( $\times 100$ ) for the GED refinement of **1**.<sup>a</sup>

|           | $p_{20}$ | $u_{544}$ | $k_2$ |
|-----------|----------|-----------|-------|
| $p_5$     |          | -50       |       |
| $p_{19}$  | -50      |           |       |
| $u_{112}$ |          |           | 74    |
| $u_{133}$ |          |           | 50    |

<sup>a</sup> Only values  $\geq 50\%$  are included.  $k_2$  is a scale factor.

**Table S3** Least-squares correlation matrix ( $\times 100$ ) for the GED refinement of **2**.<sup>a</sup>

|           | $p_3$ | $p_6$ | $p_{19}$ | $u_{127}$ | $u_{447}$ | $u_{655}$ | $u_{874}$ |
|-----------|-------|-------|----------|-----------|-----------|-----------|-----------|
| $p_2$     | -94   |       |          | 83        | -62       |           |           |
| $p_3$     | 100   |       |          | -84       | 62        |           |           |
| $p_5$     |       | -58   |          |           |           |           |           |
| $p_7$     |       |       | -51      |           |           | -58       |           |
| $u_{127}$ |       |       |          | 100       | -51       |           |           |
| $u_{655}$ |       |       |          |           |           | 100       | 69        |

<sup>a</sup> Only values  $\geq 50\%$  are included.**Table S4** Calculated Cartesian coordinates [B3LYP/6-311G(2d,p); in pm] for all four conformers of **1**.<sup>a</sup>

| <b>1a</b> |         |         |         | <b>1b</b> |         |         |         |
|-----------|---------|---------|---------|-----------|---------|---------|---------|
|           | $x$     | $y$     | $z$     |           | $x$     | $y$     | $z$     |
| Si(1)     | 109.61  | 52.67   | 47.57   | Si(57)    | 110.45  | 46.43   | -45.37  |
| Si(2)     | -109.61 | 52.66   | -47.57  | Si(58)    | -110.45 | 46.43   | 45.37   |
| Si(3)     | -181.31 | -144.70 | -159.51 | Si(59)    | -258.54 | 149.07  | -109.96 |
| Si(4)     | -266.59 | 141.91  | 107.74  | Si(60)    | -200.92 | -151.71 | 141.62  |
| Si(5)     | 181.31  | -144.70 | 159.51  | Si(61)    | 258.54  | 149.07  | 109.96  |
| Si(6)     | 266.59  | 141.91  | -107.74 | Si(62)    | 200.92  | -151.71 | -141.62 |
| C(7)      | -49.25  | -205.08 | -280.71 | C(63)     | -261.65 | 52.59   | -272.58 |
| H(8)      | 44.97   | -228.07 | -230.64 | H(64)     | -295.74 | -50.14  | -257.83 |
| H(9)      | -83.27  | -295.88 | -331.45 | H(65)     | -329.51 | 100.29  | -343.94 |
| H(10)     | -28.62  | -130.04 | -357.38 | H(66)     | -162.58 | 48.84   | -318.49 |
| C(11)     | -221.63 | -284.61 | -38.67  | C(67)     | -434.49 | 156.79  | -40.39  |
| H(12)     | -258.90 | -371.86 | -93.19  | H(68)     | -500.67 | 208.47  | -110.58 |
| H(13)     | -133.78 | -316.26 | 17.96   | H(69)     | -475.98 | 57.23   | -23.09  |
| H(14)     | -298.62 | -255.07 | 33.01   | H(70)     | -437.55 | 211.24  | 54.30   |
| C(15)     | -337.07 | -104.87 | -259.34 | C(71)     | -200.61 | 325.73  | -144.33 |
| H(16)     | -420.56 | -75.78  | -195.30 | H(72)     | -200.75 | 385.91  | -53.14  |
| H(17)     | -319.20 | -23.35  | -329.84 | H(73)     | -99.43  | 327.36  | -185.37 |
| H(18)     | -368.15 | -192.59 | -316.94 | H(74)     | -266.95 | 374.27  | -216.57 |
| C(19)     | -216.48 | 319.66  | 148.34  | C(75)     | -69.21  | -256.95 | 227.44  |
| H(20)     | -116.02 | 324.13  | 190.92  | H(76)     | 2.90    | -297.60 | 156.24  |
| H(21)     | -217.74 | 382.49  | 58.96   | H(77)     | -13.90  | -199.24 | 301.88  |
| H(22)     | -285.80 | 363.26  | 220.94  | H(78)     | -116.27 | -341.33 | 278.84  |
| C(23)     | -440.83 | 144.53  | 33.77   | C(79)     | -327.15 | -98.11  | 272.04  |
| H(24)     | -443.27 | 197.70  | -61.63  | H(80)     | -279.72 | -39.14  | 350.84  |
| H(25)     | -479.15 | 43.64   | 16.86   | H(81)     | -407.01 | -37.51  | 228.69  |
| H(26)     | -509.87 | 195.14  | 101.95  | H(82)     | -373.26 | -185.65 | 318.80  |
| C(27)     | -271.05 | 41.42   | 267.78  | C(83)     | -289.43 | -258.82 | 13.18   |
| H(28)     | -343.65 | 84.50   | 337.39  | H(84)     | -330.43 | -348.38 | 60.84   |
| H(29)     | -299.95 | -62.38  | 249.75  | H(85)     | -372.50 | -205.13 | -33.22  |

|       |         |         |         |        |         |         |         |
|-------|---------|---------|---------|--------|---------|---------|---------|
| H(30) | -173.78 | 40.80   | 317.39  | H(86)  | -222.30 | -291.45 | -66.52  |
| C(31) | 49.26   | -205.06 | 280.72  | C(87)  | 261.65  | 52.59   | 272.58  |
| H(32) | 83.28   | -295.87 | 331.47  | H(88)  | 329.51  | 100.29  | 343.94  |
| H(33) | 28.64   | -130.02 | 357.39  | H(89)  | 162.59  | 48.84   | 318.49  |
| H(34) | -44.97  | -228.05 | 230.66  | H(90)  | 295.74  | -50.14  | 257.83  |
| C(35) | 221.62  | -284.61 | 38.68   | C(91)  | 434.49  | 156.80  | 40.39   |
| H(36) | 133.77  | -316.26 | -17.95  | H(92)  | 475.98  | 57.24   | 23.08   |
| H(37) | 298.61  | -255.08 | -33.01  | H(93)  | 437.55  | 211.24  | -54.30  |
| H(38) | 258.89  | -371.86 | 93.20   | H(94)  | 500.67  | 208.47  | 110.58  |
| C(39) | 337.08  | -104.86 | 259.33  | C(95)  | 200.61  | 325.73  | 144.33  |
| H(40) | 368.16  | -192.58 | 316.93  | H(96)  | 266.95  | 374.27  | 216.57  |
| H(41) | 420.56  | -75.77  | 195.28  | H(97)  | 200.75  | 385.91  | 53.14   |
| H(42) | 319.21  | -23.33  | 329.83  | H(98)  | 99.43   | 327.36  | 185.37  |
| C(43) | 216.48  | 319.66  | -148.35 | C(99)  | 69.21   | -256.95 | -227.44 |
| H(44) | 116.02  | 324.13  | -190.93 | H(100) | -2.90   | -297.60 | -156.25 |
| H(45) | 217.74  | 382.49  | -58.97  | H(101) | 13.91   | -199.23 | -301.88 |
| H(46) | 285.79  | 363.26  | -220.95 | H(102) | 116.27  | -341.33 | -278.84 |
| C(47) | 440.83  | 144.53  | -33.78  | C(103) | 327.15  | -98.11  | -272.04 |
| H(48) | 443.27  | 197.70  | 61.62   | H(104) | 279.73  | -39.14  | -350.84 |
| H(49) | 479.15  | 43.64   | -16.86  | H(105) | 407.01  | -37.52  | -228.68 |
| H(50) | 509.87  | 195.14  | -101.96 | H(106) | 373.26  | -185.65 | -318.80 |
| C(51) | 271.04  | 41.41   | -267.78 | C(107) | 289.43  | -258.82 | -13.18  |
| H(52) | 343.65  | 84.49   | -337.39 | H(108) | 330.42  | -348.39 | -60.84  |
| H(53) | 299.95  | -62.38  | -249.75 | H(109) | 372.49  | -205.13 | 33.22   |
| H(54) | 173.78  | 40.79   | -317.39 | H(110) | 222.30  | -291.45 | 66.52   |
| H(55) | 103.86  | 155.01  | 156.92  | H(111) | 103.39  | 141.56  | -160.90 |
| H(56) | -103.86 | 155.01  | -156.93 | H(112) | -103.39 | 141.56  | 160.90  |

| <b>1c</b> |          |          |          | <b>1d</b> |          |          |          |
|-----------|----------|----------|----------|-----------|----------|----------|----------|
|           | <i>x</i> | <i>y</i> | <i>z</i> |           | <i>x</i> | <i>y</i> | <i>z</i> |
| Si(113)   | 111.02   | -43.63   | -67.82   | Si(169)   | 110.72   | 8.31     | -45.15   |
| Si(114)   | -111.02  | 43.63    | -67.82   | Si(170)   | -110.72  | 8.31     | 45.15    |
| Si(115)   | -277.77  | -124.59  | -95.53   | Si(171)   | -232.84  | 193.99   | -44.14   |
| Si(116)   | -170.39  | 203.66   | 98.46    | Si(172)   | -234.55  | -195.46  | 43.23    |
| Si(117)   | 277.77   | 124.59   | -95.53   | Si(173)   | 232.85   | 193.98   | 44.14    |
| Si(118)   | 170.39   | -203.66  | 98.46    | Si(174)   | 234.54   | -195.47  | -43.23   |
| C(119)    | -329.06  | -199.98  | 70.42    | C(175)    | -183.08  | 228.39   | -223.28  |
| H(120)    | -373.39  | -125.05  | 136.45   | H(176)    | -199.43  | 140.81   | -286.57  |
| H(121)    | -403.62  | -278.53  | 54.86    | H(177)    | -243.27  | 310.34   | -263.74  |
| H(122)    | -244.44  | -244.73  | 123.03   | H(178)    | -77.96   | 256.33   | -232.37  |
| C(123)    | -430.60  | -47.03   | -175.85  | C(179)    | -419.86  | 164.52   | -42.02   |
| H(124)    | -508.12  | -122.90  | -190.39  | H(180)    | -471.05  | 253.66   | -79.63   |
| H(125)    | -473.04  | 32.80    | -114.64  | H(181)    | -449.02  | 80.57    | -105.52  |

|        |         |         |         |        |         |         |         |
|--------|---------|---------|---------|--------|---------|---------|---------|
| H(126) | -406.46 | -4.80   | -273.66 | H(182) | -456.89 | 145.09  | 58.84   |
| C(127) | -215.82 | -262.16 | -209.40 | C(183) | -200.31 | 347.57  | 61.67   |
| H(128) | -185.24 | -222.22 | -306.38 | H(184) | -235.37 | 332.14  | 164.01  |
| H(129) | -130.38 | -315.17 | -166.91 | H(185) | -94.41  | 373.43  | 66.58   |
| H(130) | -295.37 | -335.26 | -226.88 | H(186) | -253.81 | 433.80  | 20.69   |
| C(131) | -72.67  | 364.09  | 75.52   | C(187) | -144.64 | -328.97 | 142.82  |
| H(132) | 34.56   | 349.89  | 90.22   | H(188) | -46.95  | -354.16 | 101.46  |
| H(133) | -87.55  | 405.50  | -24.48  | H(189) | -129.86 | -296.65 | 246.16  |
| H(134) | -106.35 | 438.93  | 147.92  | H(190) | -204.53 | -420.55 | 144.94  |
| C(135) | -353.93 | 246.62  | 80.05   | C(191) | -401.16 | -168.25 | 128.98  |
| H(136) | -377.15 | 281.94  | -20.69  | H(192) | -388.10 | -126.14 | 228.95  |
| H(137) | -418.30 | 160.98  | 101.26  | H(193) | -466.43 | -101.48 | 72.61   |
| H(138) | -380.66 | 326.25  | 150.21  | H(194) | -452.79 | -264.14 | 139.86  |
| C(139) | -142.08 | 140.27  | 274.32  | C(195) | -266.79 | -257.29 | -132.56 |
| H(140) | -176.08 | 214.81  | 346.85  | H(196) | -325.32 | -349.70 | -130.37 |
| H(141) | -197.21 | 47.91   | 293.50  | H(197) | -323.26 | -183.81 | -190.50 |
| H(142) | -36.43  | 120.82  | 293.80  | H(198) | -174.06 | -277.82 | -186.43 |
| C(143) | 329.06  | 199.98  | 70.42   | C(199) | 419.87  | 164.50  | 42.01   |
| H(144) | 403.62  | 278.53  | 54.86   | H(200) | 471.06  | 253.64  | 79.62   |
| H(145) | 244.44  | 244.73  | 123.03  | H(201) | 449.03  | 80.55   | 105.51  |
| H(146) | 373.39  | 125.05  | 136.45  | H(202) | 456.90  | 145.07  | -58.85  |
| C(147) | 430.60  | 47.02   | -175.85 | C(203) | 200.33  | 347.56  | -61.66  |
| H(148) | 473.04  | -32.80  | -114.64 | H(204) | 235.38  | 332.13  | -164.01 |
| H(149) | 406.46  | 4.79    | -273.66 | H(205) | 94.43   | 373.43  | -66.57  |
| H(150) | 508.12  | 122.90  | -190.39 | H(206) | 253.83  | 433.79  | -20.69  |
| C(151) | 215.82  | 262.16  | -209.40 | C(207) | 183.10  | 228.38  | 223.28  |
| H(152) | 295.37  | 335.26  | -226.88 | H(208) | 243.29  | 310.33  | 263.74  |
| H(153) | 185.24  | 222.22  | -306.38 | H(209) | 77.98   | 256.33  | 232.37  |
| H(154) | 130.38  | 315.17  | -166.91 | H(210) | 199.44  | 140.80  | 286.57  |
| C(155) | 72.67   | -364.09 | 75.52   | C(211) | 144.62  | -328.96 | -142.83 |
| H(156) | -34.56  | -349.88 | 90.22   | H(212) | 46.92   | -354.14 | -101.49 |
| H(157) | 87.55   | -405.50 | -24.48  | H(213) | 129.86  | -296.64 | -246.18 |
| H(158) | 106.35  | -438.93 | 147.92  | H(214) | 204.50  | -420.55 | -144.95 |
| C(159) | 353.93  | -246.62 | 80.05   | C(215) | 401.15  | -168.27 | -128.96 |
| H(160) | 377.15  | -281.94 | -20.69  | H(216) | 388.11  | -126.15 | -228.93 |
| H(161) | 418.30  | -160.98 | 101.26  | H(217) | 466.44  | -101.51 | -72.59  |
| H(162) | 380.66  | -326.25 | 150.21  | H(218) | 452.78  | -264.17 | -139.85 |
| C(163) | 142.08  | -140.27 | 274.32  | C(219) | 266.76  | -257.31 | 132.56  |
| H(164) | 176.08  | -214.81 | 346.85  | H(220) | 325.29  | -349.73 | 130.37  |
| H(165) | 197.21  | -47.91  | 293.50  | H(221) | 323.23  | -183.83 | 190.51  |
| H(166) | 36.43   | -120.82 | 293.80  | H(222) | 174.03  | -277.84 | 186.42  |
| H(167) | 116.36  | -121.13 | -195.92 | H(223) | 94.62   | 37.06   | -191.15 |
| H(168) | -116.36 | 121.13  | -195.92 | H(224) | -94.62  | 37.06   | 191.15  |

<sup>a</sup> Calculated sums of electronic and thermal free energies (ZPE corrected) using B3LYP/6-311G(2d,p) = -2217.223362 (**1a**), -2217.220010 (**1b**), -2217.221171 (**1c**), and -2217.216812 (**1d**) Hartrees.

**Table S5** Calculated Cartesian coordinates [B3LYP-GD3/6-311G(2d,p); in pm] for all four conformers of **1**.<sup>a</sup>

| <b>1a</b> |          |          |          | <b>1b</b> |          |          |          |
|-----------|----------|----------|----------|-----------|----------|----------|----------|
|           | <i>x</i> | <i>y</i> | <i>z</i> |           | <i>x</i> | <i>y</i> | <i>z</i> |
| Si(1)     | 59.01    | 103.01   | 62.52    | Si(57)    | 107.71   | -50.15   | 35.81    |
| Si(2)     | -59.01   | -103.01  | 62.52    | Si(58)    | -107.71  | 50.15    | 35.81    |
| Si(3)     | -171.77  | -159.34  | -137.91  | Si(59)    | -91.37   | 245.04   | 168.80   |
| Si(4)     | 86.44    | -274.74  | 136.20   | Si(60)    | -214.06  | 96.81    | -170.26  |
| Si(5)     | 171.77   | 159.34   | -137.91  | Si(61)    | 91.37    | -245.04  | 168.80   |
| Si(6)     | -86.44   | 274.74   | 136.20   | Si(62)    | 214.06   | -96.81   | -170.26  |
| C(7)      | -282.01  | -18.89   | -199.55  | C(63)     | 40.43    | 358.30   | 94.76    |
| H(8)      | -225.98  | 73.12    | -216.67  | H(64)     | 14.46    | 388.46   | -6.97    |
| H(9)      | -329.80  | -47.43   | -293.77  | H(65)     | 51.56    | 448.96   | 154.96   |
| H(10)     | -360.94  | 3.34     | -127.41  | H(66)     | 137.36   | 308.06   | 91.23    |
| C(11)     | -48.05   | -204.99  | -273.35  | C(67)     | -255.91  | 337.99   | 174.76   |
| H(12)     | -100.93  | -239.33  | -362.75  | H(68)     | -248.33  | 425.09   | 240.55   |
| H(13)     | 13.95    | -119.89  | -302.04  | H(69)     | -284.88  | 373.53   | 75.59    |
| H(14)     | 18.43    | -285.42  | -240.92  | H(70)     | -336.32  | 274.32   | 212.38   |
| C(15)     | -282.01  | -309.14  | -104.16  | C(71)     | -40.43   | 197.36   | 344.29   |
| H(16)     | -223.68  | -395.98  | -72.99   | H(72)     | -115.11  | 132.81   | 391.09   |
| H(17)     | -354.45  | -287.51  | -25.28   | H(73)     | 54.71    | 143.72   | 344.08   |
| H(18)     | -337.63  | -336.34  | -194.38  | H(74)     | -28.90   | 286.50   | 406.68   |
| C(19)     | 130.37   | -243.19  | 317.11   | C(75)     | -199.63  | -46.30   | -292.79  |
| H(20)     | 176.78   | -145.07  | 329.44   | H(76)     | -96.59   | -62.58   | -324.63  |
| H(21)     | 41.38    | -246.43  | 380.40   | H(77)     | -236.24  | -139.40  | -248.83  |
| H(22)     | 200.61   | -318.77  | 353.51   | H(78)     | -259.36  | -25.60   | -382.10  |
| C(23)     | 5.84     | -445.04  | 120.66   | C(79)     | -397.56  | 125.37   | -134.92  |
| H(24)     | -90.55   | -448.81  | 171.92   | H(80)     | -443.75  | 35.84    | -92.65   |
| H(25)     | -10.73   | -471.43  | 15.95    | H(81)     | -412.39  | 207.18   | -64.13   |
| H(26)     | 70.41    | -521.70  | 164.55   | H(82)     | -450.78  | 150.43   | -227.19  |
| C(27)     | 244.87   | -273.68  | 33.46    | C(83)     | -142.60  | 253.90   | -247.34  |
| H(28)     | 312.43   | -352.97  | 66.88    | H(84)     | -187.47  | 272.27   | -345.40  |
| H(29)     | 224.22   | -289.70  | -72.60   | H(85)     | -163.54  | 340.69   | -184.34  |
| H(30)     | 297.34   | -178.44  | 43.12    | H(86)     | -34.42   | 247.64   | -260.54  |
| C(31)     | 282.01   | 18.89    | -199.55  | C(87)     | -40.43   | -358.30  | 94.76    |
| H(32)     | 329.80   | 47.43    | -293.77  | H(88)     | -51.56   | -448.96  | 154.96   |
| H(33)     | 360.94   | -3.34    | -127.41  | H(89)     | -137.36  | -308.06  | 91.23    |
| H(34)     | 225.98   | -73.12   | -216.67  | H(90)     | -14.46   | -388.46  | -6.97    |
| C(35)     | 48.05    | 204.99   | -273.35  | C(91)     | 255.91   | -337.99  | 174.76   |

|       |         |        |         |        |         |         |         |
|-------|---------|--------|---------|--------|---------|---------|---------|
| H(36) | -13.95  | 119.89 | -302.04 | H(92)  | 284.88  | -373.53 | 75.59   |
| H(37) | -18.43  | 285.42 | -240.92 | H(93)  | 336.32  | -274.32 | 212.38  |
| H(38) | 100.93  | 239.33 | -362.75 | H(94)  | 248.33  | -425.09 | 240.55  |
| C(39) | 282.01  | 309.14 | -104.16 | C(95)  | 40.43   | -197.36 | 344.29  |
| H(40) | 337.63  | 336.34 | -194.38 | H(96)  | 28.90   | -286.50 | 406.68  |
| H(41) | 223.68  | 395.98 | -72.99  | H(97)  | 115.11  | -132.81 | 391.09  |
| H(42) | 354.45  | 287.51 | -25.28  | H(98)  | -54.71  | -143.72 | 344.08  |
| C(43) | -130.37 | 243.19 | 317.11  | C(99)  | 199.63  | 46.30   | -292.79 |
| H(44) | -176.78 | 145.07 | 329.44  | H(100) | 96.59   | 62.58   | -324.63 |
| H(45) | -41.38  | 246.43 | 380.40  | H(101) | 236.24  | 139.40  | -248.83 |
| H(46) | -200.61 | 318.77 | 353.51  | H(102) | 259.36  | 25.60   | -382.10 |
| C(47) | -5.84   | 445.04 | 120.66  | C(103) | 397.56  | -125.37 | -134.92 |
| H(48) | 90.55   | 448.81 | 171.92  | H(104) | 443.75  | -35.84  | -92.65  |
| H(49) | 10.73   | 471.43 | 15.95   | H(105) | 412.39  | -207.18 | -64.13  |
| H(50) | -70.41  | 521.70 | 164.55  | H(106) | 450.78  | -150.43 | -227.19 |
| C(51) | -244.87 | 273.68 | 33.46   | C(107) | 142.60  | -253.90 | -247.34 |
| H(52) | -312.43 | 352.97 | 66.88   | H(108) | 187.47  | -272.27 | -345.40 |
| H(53) | -224.22 | 289.70 | -72.60  | H(109) | 163.54  | -340.69 | -184.34 |
| H(54) | -297.34 | 178.44 | 43.12   | H(110) | 34.42   | -247.64 | -260.54 |
| H(55) | 165.69  | 89.81  | 166.82  | H(111) | 198.14  | 45.60   | 106.95  |
| H(56) | -165.69 | -89.81 | 166.82  | H(112) | -198.14 | -45.60  | 106.95  |

| <b>1c</b> |          |          |          | <b>1d</b> |          |          |          |
|-----------|----------|----------|----------|-----------|----------|----------|----------|
|           | <i>x</i> | <i>y</i> | <i>z</i> |           | <i>x</i> | <i>y</i> | <i>z</i> |
| Si(113)   | -50.50   | -107.43  | -83.33   | Si(169)   | -3.60    | 118.95   | 5.99     |
| Si(114)   | 50.50    | 107.43   | -83.33   | Si(170)   | 3.60     | -118.95  | 5.99     |
| Si(115)   | -111.90  | 279.79   | -81.01   | Si(171)   | -117.43  | -197.23  | 195.45   |
| Si(116)   | 216.28   | 146.17   | 82.05    | Si(172)   | -62.62   | -223.42  | -196.32  |
| Si(117)   | 111.90   | -279.79  | -81.01   | Si(173)   | 117.43   | 197.23   | 195.45   |
| Si(118)   | -216.28  | -146.17  | 82.05    | Si(174)   | 62.62    | 223.42   | -196.32  |
| C(119)    | -174.48  | 304.30   | 95.83    | C(175)    | -263.52  | -82.55   | 229.68   |
| H(120)    | -93.56   | 337.54   | 161.34   | H(176)    | -331.98  | -80.25   | 144.50   |
| H(121)    | -253.26  | 380.13   | 98.90    | H(177)    | -319.59  | -117.35  | 316.94   |
| H(122)    | -215.22  | 212.08   | 137.70   | H(178)    | -231.26  | 19.95    | 248.58   |
| C(123)    | -36.10   | 442.06   | -141.28  | C(179)    | -186.18  | -371.37  | 169.22   |
| H(124)    | -111.36  | 521.50   | -141.03  | H(180)    | -234.95  | -405.84  | 260.92   |
| H(125)    | 46.83    | 473.95   | -77.88   | H(181)    | -260.59  | -373.25  | 89.29    |
| H(126)    | 1.67     | 431.92   | -243.30  | H(182)    | -107.63  | -442.87  | 143.96   |
| C(127)    | -256.03  | 235.97   | -194.84  | C(183)    | -3.60    | -203.08  | 346.27   |
| H(128)    | -221.89  | 227.47   | -298.30  | H(184)    | 78.28    | -273.59  | 329.99   |
| H(129)    | -302.25  | 141.08   | -167.29  | H(185)    | 40.38    | -105.85  | 368.86   |
| H(130)    | -333.02  | 313.64   | -191.06  | H(186)    | -59.39   | -236.02  | 434.45   |
| C(131)    | 375.82   | 53.00    | 42.42    | C(187)    | 61.39    | -186.30  | -334.16  |

|        |         |         |         |        |         |         |         |
|--------|---------|---------|---------|--------|---------|---------|---------|
| H(132) | 362.12  | -55.15  | 46.46   | H(188) | 71.97   | -79.83  | -354.68 |
| H(133) | 412.70  | 78.41   | -57.23  | H(189) | 160.05  | -225.11 | -307.60 |
| H(134) | 453.43  | 79.62   | 114.83  | H(190) | 30.01   | -235.44 | -426.76 |
| C(135) | 256.03  | 331.08  | 85.36   | C(191) | -64.89  | -411.37 | -175.93 |
| H(136) | 286.42  | 367.52  | -13.04  | H(192) | 31.24   | -448.39 | -139.47 |
| H(137) | 169.62  | 389.59  | 117.61  | H(193) | -142.12 | -444.19 | -106.32 |
| H(138) | 337.80  | 350.80  | 155.34  | H(194) | -84.31  | -458.66 | -272.70 |
| C(139) | 157.72  | 96.25   | 254.43  | C(195) | -235.65 | -165.64 | -245.40 |
| H(140) | 235.51  | 118.47  | 328.09  | H(196) | -266.13 | -210.62 | -340.33 |
| H(141) | 67.72   | 150.94  | 283.36  | H(197) | -308.84 | -194.81 | -169.62 |
| H(142) | 135.20  | -10.33  | 260.51  | H(198) | -240.63 | -57.14  | -256.28 |
| C(143) | 174.48  | -304.30 | 95.83   | C(199) | 186.18  | 371.37  | 169.22  |
| H(144) | 253.26  | -380.13 | 98.90   | H(200) | 234.95  | 405.84  | 260.92  |
| H(145) | 215.22  | -212.08 | 137.70  | H(201) | 260.59  | 373.25  | 89.29   |
| H(146) | 93.56   | -337.54 | 161.34  | H(202) | 107.63  | 442.87  | 143.96  |
| C(147) | 36.10   | -442.06 | -141.28 | C(203) | 3.60    | 203.08  | 346.27  |
| H(148) | -46.83  | -473.95 | -77.88  | H(204) | -78.28  | 273.59  | 329.99  |
| H(149) | -1.67   | -431.92 | -243.30 | H(205) | -40.38  | 105.85  | 368.86  |
| H(150) | 111.36  | -521.50 | -141.03 | H(206) | 59.39   | 236.02  | 434.45  |
| C(151) | 256.03  | -235.97 | -194.84 | C(207) | 263.52  | 82.55   | 229.68  |
| H(152) | 333.02  | -313.64 | -191.06 | H(208) | 319.59  | 117.35  | 316.94  |
| H(153) | 221.89  | -227.47 | -298.30 | H(209) | 231.26  | -19.95  | 248.58  |
| H(154) | 302.25  | -141.08 | -167.29 | H(210) | 331.98  | 80.25   | 144.50  |
| C(155) | -375.82 | -53.00  | 42.42   | C(211) | -61.39  | 186.30  | -334.16 |
| H(156) | -362.12 | 55.15   | 46.46   | H(212) | -71.97  | 79.83   | -354.68 |
| H(157) | -412.70 | -78.41  | -57.23  | H(213) | -160.05 | 225.11  | -307.60 |
| H(158) | -453.43 | -79.62  | 114.83  | H(214) | -30.01  | 235.44  | -426.76 |
| C(159) | -256.03 | -331.08 | 85.36   | C(215) | 64.89   | 411.37  | -175.93 |
| H(160) | -286.42 | -367.52 | -13.04  | H(216) | -31.24  | 448.39  | -139.47 |
| H(161) | -169.62 | -389.59 | 117.61  | H(217) | 142.12  | 444.19  | -106.32 |
| H(162) | -337.80 | -350.80 | 155.34  | H(218) | 84.31   | 458.66  | -272.70 |
| C(163) | -157.72 | -96.25  | 254.43  | C(219) | 235.65  | 165.64  | -245.40 |
| H(164) | -235.51 | -118.47 | 328.09  | H(220) | 266.13  | 210.62  | -340.33 |
| H(165) | -67.72  | -150.94 | 283.36  | H(221) | 308.84  | 194.81  | -169.62 |
| H(166) | -135.20 | 10.33   | 260.51  | H(222) | 240.63  | 57.14   | -256.28 |
| H(167) | -121.81 | -116.98 | -214.58 | H(223) | -146.76 | 157.11  | 26.55   |
| H(168) | 121.81  | 116.98  | -214.58 | H(224) | 146.76  | -157.11 | 26.55   |

<sup>a</sup> Calculated sums of electronic and thermal free energies (ZPE corrected) using B3LYP/6-311G(2d,p) = -2217.277067 (**1a**), -2217.276579 (**1b**), -2217.274961 (**1c**), and -2217.273514 (**1d**) Hartrees.

**Table S6** Calculated Cartesian coordinates [B3LYP/6-311G(2d,p); in pm] for all four conformers of **2**.<sup>a</sup>

| <b>2a</b> |          |          |          | <b>2b</b> |          |          |          |
|-----------|----------|----------|----------|-----------|----------|----------|----------|
|           | <i>x</i> | <i>y</i> | <i>z</i> |           | <i>x</i> | <i>y</i> | <i>z</i> |
| Si(1)     | -112.65  | 41.55    | -62.96   | Si(63)    | -110.53  | 44.14    | -52.24   |
| Si(2)     | 112.65   | -41.55   | -62.96   | Si(64)    | 110.37   | -51.12   | -46.68   |
| Si(3)     | 275.65   | 133.41   | -58.50   | Si(65)    | 273.48   | 106.52   | -122.86  |
| Si(4)     | 165.68   | -205.73  | 102.63   | Si(66)    | 177.44   | -147.78  | 161.14   |
| Si(5)     | -275.64  | -133.41  | -58.51   | Si(67)    | -273.94  | -121.76  | -107.46  |
| Si(6)     | -165.69  | 205.73   | 102.62   | Si(68)    | -176.77  | 167.67   | 141.27   |
| C(7)      | 302.17   | 203.87   | 115.33   | C(69)     | 261.48   | 274.30   | -36.38   |
| H(8)      | 339.52   | 127.61   | 184.10   | H(70)     | 274.81   | 265.54   | 71.66    |
| H(9)      | 376.03   | 284.56   | 112.45   | H(71)     | 339.20   | 341.43   | -74.13   |
| H(10)     | 210.37   | 244.82   | 157.98   | H(72)     | 164.89   | 322.00   | -54.01   |
| C(11)     | 441.78   | 65.56    | -119.68  | C(73)     | 449.18   | 40.52    | -95.87   |
| H(12)     | 516.41   | 145.62   | -120.73  | H(74)     | 521.58   | 108.49   | -141.91  |
| H(13)     | 479.75   | -14.49   | -55.97   | H(75)     | 474.16   | 32.84    | 10.18    |
| H(14)     | 433.99   | 26.55    | -221.45  | H(76)     | 463.23   | -58.01   | -140.91  |
| C(15)     | 229.36   | 275.24   | -175.30  | C(77)     | 252.48   | 133.83   | -309.20  |
| H(16)     | 216.17   | 239.61   | -277.77  | H(78)     | 262.08   | 40.24    | -364.77  |
| H(17)     | 137.34   | 325.61   | -145.28  | H(79)     | 155.35   | 177.35   | -333.43  |
| H(18)     | 309.29   | 350.00   | -176.52  | H(80)     | 329.73   | 202.11   | -345.92  |
| C(19)     | 89.29    | -373.32  | 57.87    | C(81)     | 44.10    | -260.61  | 234.10   |
| H(20)     | -19.79   | -371.87  | 61.21    | H(82)     | -49.15   | -207.27  | 253.21   |
| H(21)     | 119.29   | -405.58  | -42.12   | H(83)     | 21.46    | -344.15  | 167.46   |
| H(22)     | 123.40   | -449.45  | 128.72   | H(84)     | 78.70    | -302.62  | 329.06   |
| C(23)     | 353.25   | -232.91  | 109.71   | C(85)     | 330.19   | -255.84  | 130.77   |
| H(24)     | 394.48   | -259.36  | 12.05    | H(86)     | 309.66   | -334.10  | 57.33    |
| H(25)     | 406.47   | -144.63  | 145.78   | H(87)     | 415.39   | -197.83  | 94.85    |
| H(26)     | 375.68   | -315.20  | 178.31   | H(88)     | 360.15   | -304.93  | 223.88   |
| C(27)     | 108.15   | -158.42  | 276.40   | C(89)     | 222.55   | -17.65   | 291.08   |
| H(28)     | 137.44   | -235.98  | 347.81   | H(90)     | 257.48   | -66.68   | 382.47   |
| H(29)     | 152.63   | -64.35   | 309.63   | H(91)     | 302.46   | 48.28    | 256.42   |
| H(30)     | -0.33    | -147.49  | 281.78   | H(92)     | 137.08   | 44.77    | 317.94   |
| C(31)     | -302.17  | -203.87  | 115.33   | C(93)     | -260.24  | -279.68  | -4.14    |
| H(32)     | -376.03  | -284.55  | 112.45   | H(94)     | -338.19  | -350.43  | -34.04   |
| H(33)     | -210.37  | -244.81  | 157.98   | H(95)     | -163.79  | -329.03  | -17.65   |
| H(34)     | -339.53  | -127.61  | 184.10   | H(96)     | -272.66  | -259.94  | 102.57   |
| C(35)     | -441.77  | -65.57   | -119.69  | C(97)     | -449.75  | -54.34   | -85.08   |
| H(36)     | -479.75  | 14.48    | -55.99   | H(98)     | -473.07  | -34.83   | 19.82    |
| H(37)     | -433.97  | -26.57   | -221.46  | H(99)     | -465.50  | 38.31    | -140.76  |
| H(38)     | -516.40  | -145.64  | -120.75  | H(100)    | -522.17  | -127.70  | -121.87  |
| C(39)     | -229.33  | -275.24  | -175.29  | C(101)    | -255.73  | -168.48  | -290.29  |



|       |         |         |         |        |         |         |         |
|-------|---------|---------|---------|--------|---------|---------|---------|
| H(40) | -309.26 | -350.01 | -176.51 | H(102) | -334.68 | -238.63 | -319.00 |
| H(41) | -216.14 | -239.62 | -277.77 | H(103) | -264.33 | -80.88  | -355.04 |
| H(42) | -137.32 | -325.61 | -145.26 | H(104) | -159.75 | -216.15 | -311.10 |
| C(43) | -89.32  | 373.34  | 57.85   | C(105) | -45.46  | 293.94  | 192.84  |
| H(44) | 19.76   | 371.90  | 61.18   | H(106) | 49.70   | 247.00  | 218.26  |
| H(45) | -119.34 | 405.58  | -42.13  | H(107) | -26.42  | 366.31  | 113.28  |
| H(46) | -123.45 | 449.46  | 128.70  | H(108) | -79.86  | 349.60  | 280.57  |
| C(47) | -353.26 | 232.89  | 109.73  | C(109) | -333.51 | 265.90  | 99.98   |
| H(48) | -394.51 | 259.32  | 12.06   | H(110) | -316.96 | 334.34  | 16.42   |
| H(49) | -406.46 | 144.60  | 145.81  | H(111) | -417.33 | 201.05  | 73.93   |
| H(50) | -375.69 | 315.18  | 178.32  | H(112) | -363.41 | 326.05  | 186.38  |
| C(51) | -108.13 | 158.44  | 276.39  | C(113) | -214.48 | 57.02   | 290.18  |
| H(52) | -137.43 | 236.00  | 347.81  | H(114) | -249.27 | 118.10  | 374.04  |
| H(53) | -152.59 | 64.37   | 309.63  | H(115) | -292.62 | -16.07  | 267.99  |
| H(54) | 0.35    | 147.52  | 281.76  | H(116) | -126.19 | 2.32    | 323.81  |
| C(55) | -137.31 | 127.33  | -233.04 | C(117) | -118.89 | 169.30  | -197.86 |
| C(56) | 137.31  | -127.33 | -233.04 | C(118) | 118.11  | -194.45 | -174.45 |
| H(57) | -67.58  | 210.12  | -247.03 | H(119) | -52.82  | 254.78  | -181.89 |
| H(58) | -122.29 | 56.92   | -315.21 | H(120) | -90.47  | 122.36  | -292.26 |
| H(59) | -238.71 | 167.11  | -241.72 | H(121) | -220.49 | 207.88  | -209.41 |
| H(60) | 67.57   | -210.12 | -247.02 | H(122) | 52.24   | -276.96 | -146.67 |
| H(61) | 122.30  | -56.93  | -315.20 | H(123) | 89.17   | -160.67 | -274.17 |
| H(62) | 238.71  | -167.11 | -241.71 | H(124) | 219.74  | -234.12 | -180.96 |

| <b>2c</b> |          |          |          | <b>2d</b> |          |          |          |
|-----------|----------|----------|----------|-----------|----------|----------|----------|
|           | <i>x</i> | <i>y</i> | <i>z</i> |           | <i>x</i> | <i>y</i> | <i>z</i> |
| Si(125)   | -246.61  | 42.69    | 0.17     | Si(187)   | -112.19  | -24.09   | -45.64   |
| Si(126)   | -149.85  | 144.82   | -194.46  | Si(188)   | 112.19   | -24.09   | 45.64    |
| Si(127)   | -195.85  | 380.01   | -205.79  | Si(189)   | 253.34   | -166.81  | -84.77   |
| Si(128)   | 88.03    | 124.06   | -212.85  | Si(190)   | 221.02   | 186.57   | 77.56    |
| Si(129)   | -480.33  | -3.92    | -29.19   | Si(191)   | -253.34  | -166.81  | 84.77    |
| Si(130)   | -147.45  | -164.66  | 67.15    | Si(192)   | -221.02  | 186.56   | -77.56   |
| C(131)    | -70.93   | 478.43   | -102.75  | C(193)    | 264.81   | -113.35  | -266.03  |
| H(132)    | 31.26    | 466.62   | -139.27  | H(194)    | 296.39   | -9.19    | -275.49  |
| H(133)    | -95.39   | 585.01   | -106.89  | H(195)    | 338.44   | -175.12  | -318.37  |
| H(134)    | -72.56   | 448.28   | 2.26     | H(196)    | 169.48   | -124.22  | -317.99  |
| C(135)    | -182.93  | 435.94   | -386.45  | C(197)    | 429.66   | -167.05  | -14.91   |
| H(136)    | -201.72  | 543.50   | -393.86  | H(198)    | 489.99   | -241.56  | -67.71   |
| H(137)    | -84.34   | 416.40   | -429.01  | H(199)    | 478.46   | -70.19   | -27.64   |
| H(138)    | -256.84  | 385.19   | -448.94  | H(200)    | 431.90   | -192.10  | 91.40    |
| C(139)    | -367.89  | 430.69   | -145.24  | C(201)    | 191.33   | -345.68  | -77.52   |
| H(140)    | -447.31  | 386.91   | -205.89  | H(202)    | 191.88   | -383.53  | 24.99    |
| H(141)    | -385.27  | 402.07   | -41.30   | H(203)    | 89.77    | -355.96  | -116.13  |

|        |         |         |         |        |         |         |         |
|--------|---------|---------|---------|--------|---------|---------|---------|
| H(142) | -377.45 | 539.55  | -151.60 | H(204) | 256.44  | -410.52 | -136.95 |
| C(143) | 139.90  | -53.43  | -254.27 | C(205) | 110.45  | 310.18  | 169.19  |
| H(144) | 116.77  | -123.73 | -174.16 | H(206) | 22.63   | 339.21  | 111.52  |
| H(145) | 90.93   | -89.07  | -345.24 | H(207) | 75.76   | 268.74  | 264.19  |
| H(146) | 247.93  | -57.21  | -271.39 | H(208) | 167.08  | 401.09  | 191.69  |
| C(147) | 151.30  | 231.56  | -355.84 | C(209) | 371.75  | 159.81  | 189.51  |
| H(148) | 103.42  | 205.49  | -450.54 | H(210) | 342.73  | 118.39  | 286.38  |
| H(149) | 135.07  | 338.08  | -338.27 | H(211) | 445.52  | 92.68   | 145.27  |
| H(150) | 258.98  | 216.25  | -368.20 | H(212) | 421.10  | 255.69  | 208.27  |
| C(151) | 178.78  | 178.62  | -55.88  | C(213) | 281.95  | 263.99  | -84.05  |
| H(152) | 286.80  | 167.55  | -69.51  | H(214) | 325.60  | 362.47  | -64.81  |
| H(153) | 159.06  | 283.37  | -32.26  | H(215) | 359.37  | 202.16  | -130.13 |
| H(154) | 150.21  | 119.07  | 31.01   | H(216) | 201.84  | 276.86  | -157.06 |
| C(155) | -506.26 | -170.01 | -116.63 | C(217) | -264.79 | -113.36 | 266.04  |
| H(156) | -613.30 | -188.04 | -130.51 | H(218) | -338.43 | -175.13 | 318.37  |
| H(157) | -459.48 | -171.66 | -215.36 | H(219) | -169.46 | -124.23 | 317.99  |
| H(158) | -465.94 | -253.59 | -59.15  | H(220) | -296.37 | -9.20   | 275.51  |
| C(159) | -563.13 | -12.19  | 141.16  | C(221) | -429.66 | -167.04 | 14.92   |
| H(160) | -519.30 | -89.20  | 204.93  | H(222) | -478.46 | -70.18  | 27.66   |
| H(161) | -555.25 | 83.20   | 193.89  | H(223) | -431.91 | -192.08 | -91.39  |
| H(162) | -669.61 | -34.87  | 129.89  | H(224) | -489.99 | -241.55 | 67.72   |
| C(163) | -574.87 | 125.69  | -129.63 | C(225) | -191.34 | -345.68 | 77.50   |
| H(164) | -679.32 | 94.46   | -139.46 | H(226) | -256.44 | -410.53 | 136.94  |
| H(165) | -573.97 | 223.50  | -81.34  | H(227) | -191.89 | -383.53 | -25.00  |
| H(166) | -534.36 | 137.55  | -230.34 | H(228) | -89.78  | -355.97 | 116.11  |
| C(167) | 24.98   | -139.46 | 141.47  | C(229) | -110.46 | 310.18  | -169.20 |
| H(168) | 97.09   | -102.55 | 68.45   | H(230) | -22.63  | 339.21  | -111.54 |
| H(169) | 22.47   | -68.71  | 224.73  | H(231) | -75.77  | 268.73  | -264.21 |
| H(170) | 62.81   | -234.56 | 180.23  | H(232) | -167.09 | 401.09  | -191.70 |
| C(171) | -252.47 | -243.74 | 203.94  | C(233) | -371.76 | 159.81  | -189.50 |
| H(172) | -262.99 | -177.57 | 290.26  | H(234) | -342.75 | 118.38  | -286.37 |
| H(173) | -352.68 | -269.84 | 169.37  | H(235) | -445.53 | 92.67   | -145.25 |
| H(174) | -204.45 | -335.75 | 238.69  | H(236) | -421.12 | 255.69  | -208.26 |
| C(175) | -135.21 | -288.81 | -75.22  | C(237) | -281.94 | 264.00  | 84.05   |
| H(176) | -88.64  | -381.50 | -40.35  | H(238) | -325.59 | 362.47  | 64.81   |
| H(177) | -233.72 | -314.21 | -114.84 | H(239) | -359.36 | 202.17  | 130.14  |
| H(178) | -75.07  | -250.64 | -157.91 | H(240) | -201.82 | 276.87  | 157.05  |
| C(179) | -226.70 | 162.14  | 148.87  | C(241) | -109.78 | -99.61  | -222.20 |
| C(180) | -222.98 | 60.58   | -350.48 | C(242) | 109.78  | -99.61  | 222.19  |
| H(181) | -121.38 | 184.69  | 167.16  | H(243) | -51.73  | -37.96  | -291.15 |
| H(182) | -278.46 | 256.79  | 132.00  | H(244) | -67.53  | -200.23 | -223.77 |
| H(183) | -267.52 | 117.93  | 240.04  | H(245) | -211.54 | -105.87 | -261.50 |
| H(184) | -203.06 | -46.84  | -349.94 | H(246) | 51.73   | -37.96  | 291.15  |

|        |         |        |         |        |        |         |        |
|--------|---------|--------|---------|--------|--------|---------|--------|
| H(185) | -331.13 | 74.24  | -356.79 | H(247) | 67.53  | -200.23 | 223.77 |
| H(186) | -179.10 | 101.98 | -441.57 | H(248) | 211.54 | -105.87 | 261.50 |

---

<sup>a</sup> Calculated sums of electronic and thermal free energies (ZPE corrected) using B3LYP/6-311G(2d,p) = -2295.830238 (**2a**), -2295.828696 (**2b**), -2295.827580 (**2c**), and -2295.826384 (**2d**) Hartrees.

**Table S7** Calculated Cartesian coordinates [B3LYP-GD3/6-311G(2d,p); in pm] for all four conformers of **2**.<sup>a</sup>

| <b>2a</b> |          |          |          | <b>2b</b> |          |          |          |
|-----------|----------|----------|----------|-----------|----------|----------|----------|
|           | <i>x</i> | <i>y</i> | <i>z</i> |           | <i>x</i> | <i>y</i> | <i>z</i> |
| Si(1)     | -43.44   | -110.60  | -67.05   | Si(63)    | -111.52  | -41.33   | -41.33   |
| Si(2)     | 43.44    | 110.60   | -67.05   | Si(64)    | 111.52   | 41.33    | 41.33    |
| Si(3)     | -130.52  | 271.17   | -56.87   | Si(65)    | 111.52   | 271.24   | 271.24   |
| Si(4)     | 203.73   | 160.41   | 100.73   | Si(66)    | 232.00   | 10.42    | 10.42    |
| Si(5)     | 130.52   | -271.17  | -56.87   | Si(67)    | -111.52  | -271.24  | -271.24  |
| Si(6)     | -203.73  | -160.41  | 100.73   | Si(68)    | -232.00  | -10.42   | -10.42   |
| C(7)      | -192.02  | 291.78   | 120.84   | C(69)     | -16.36   | 370.88   | 370.88   |
| H(8)      | -111.93  | 328.25   | 185.63   | H(70)     | 1.72     | 365.64   | 365.64   |
| H(9)      | -274.16  | 363.88   | 125.39   | H(71)     | -12.29   | 476.13   | 476.13   |
| H(10)     | -227.98  | 197.51   | 162.56   | H(72)     | -117.75  | 334.82   | 334.82   |
| C(11)     | -65.87   | 438.05   | -118.35  | C(73)     | 281.26   | 349.02   | 349.02   |
| H(12)     | -145.66  | 512.90   | -116.15  | H(74)     | 283.31   | 451.57   | 451.57   |
| H(13)     | 16.61    | 474.85   | -57.10   | H(75)     | 304.17   | 352.69   | 352.69   |
| H(14)     | -30.23   | 430.40   | -221.38  | H(76)     | 361.12   | 293.31   | 293.31   |
| C(15)     | -275.25  | 222.61   | -168.55  | C(77)     | 73.37    | 286.41   | 286.41   |
| H(16)     | -242.17  | 211.05   | -272.07  | H(78)     | 146.26   | 231.32   | 231.32   |
| H(17)     | -321.17  | 128.72   | -137.41  | H(79)     | -25.80   | 247.28   | 247.28   |
| H(18)     | -352.47  | 300.11   | -166.66  | H(80)     | 76.67    | 391.20   | 391.20   |
| C(19)     | 369.99   | 78.71    | 62.23    | C(81)     | 223.91   | -167.17  | -167.17  |
| H(20)     | 365.10   | -29.98   | 70.49    | H(82)     | 121.65   | -199.43  | -199.43  |
| H(21)     | 404.03   | 103.23   | -38.67   | H(83)     | 267.31   | -237.01  | -237.01  |
| H(22)     | 445.94   | 114.10   | 132.60   | H(84)     | 280.71   | -175.64  | -175.64  |
| C(23)     | 232.33   | 347.57   | 104.04   | C(85)     | 414.12   | 48.69    | 48.69    |
| H(24)     | 260.30   | 386.05   | 5.69     | H(86)     | 453.65   | -16.59   | -16.59   |
| H(25)     | 142.75   | 400.88   | 136.64   | H(87)     | 428.68   | 151.95   | 151.95   |
| H(26)     | 313.02   | 372.04   | 173.77   | H(88)     | 473.88   | 32.56    | 32.56    |
| C(27)     | 149.13   | 107.50   | 273.50   | C(89)     | 170.51   | 127.00   | 127.00   |
| H(28)     | 225.71   | 134.62   | 346.79   | H(90)     | 235.10   | 120.11   | 120.11   |
| H(29)     | 56.07    | 156.62   | 302.71   | H(91)     | 170.71   | 230.97   | 230.97   |
| H(30)     | 133.18   | -0.23    | 279.83   | H(92)     | 68.95    | 102.19   | 102.19   |
| C(31)     | 192.02   | -291.78  | 120.84   | C(93)     | 16.36    | -370.88  | -370.88  |
| H(32)     | 274.16   | -363.88  | 125.39   | H(94)     | 12.29    | -476.13  | -476.13  |
| H(33)     | 227.98   | -197.51  | 162.56   | H(95)     | 117.75   | -334.82  | -334.82  |
| H(34)     | 111.93   | -328.25  | 185.63   | H(96)     | -1.72    | -365.64  | -365.64  |
| C(35)     | 65.87    | -438.05  | -118.35  | C(97)     | -281.26  | -349.02  | -349.02  |
| H(36)     | -16.61   | -474.85  | -57.10   | H(98)     | -304.17  | -352.69  | -352.69  |
| H(37)     | 30.23    | -430.40  | -221.38  | H(99)     | -361.12  | -293.31  | -293.31  |
| H(38)     | 145.66   | -512.90  | -116.15  | H(100)    | -283.31  | -451.57  | -451.57  |
| C(39)     | 275.25   | -222.61  | -168.55  | C(101)    | -73.37   | -286.41  | -286.41  |

|       |         |         |         |        |         |         |         |
|-------|---------|---------|---------|--------|---------|---------|---------|
| H(40) | 352.47  | -300.11 | -166.66 | H(102) | -76.67  | -391.20 | -391.20 |
| H(41) | 242.17  | -211.05 | -272.07 | H(103) | -146.26 | -231.32 | -231.32 |
| H(42) | 321.17  | -128.72 | -137.41 | H(104) | 25.80   | -247.28 | -247.28 |
| C(43) | -369.99 | -78.71  | 62.23   | C(105) | -223.91 | 167.17  | 167.17  |
| H(44) | -365.10 | 29.98   | 70.49   | H(106) | -121.65 | 199.43  | 199.43  |
| H(45) | -404.03 | -103.23 | -38.67  | H(107) | -267.31 | 237.01  | 237.01  |
| H(46) | -445.94 | -114.10 | 132.60  | H(108) | -280.71 | 175.64  | 175.64  |
| C(47) | -232.33 | -347.57 | 104.04  | C(109) | -414.12 | -48.69  | -48.69  |
| H(48) | -260.30 | -386.05 | 5.69    | H(110) | -453.65 | 16.59   | 16.59   |
| H(49) | -142.75 | -400.88 | 136.64  | H(111) | -428.68 | -151.95 | -151.95 |
| H(50) | -313.02 | -372.04 | 173.77  | H(112) | -473.88 | -32.56  | -32.56  |
| C(51) | -149.13 | -107.50 | 273.50  | C(113) | -170.51 | -127.00 | -127.00 |
| H(52) | -225.71 | -134.62 | 346.79  | H(114) | -235.10 | -120.11 | -120.11 |
| H(53) | -56.07  | -156.62 | 302.71  | H(115) | -170.71 | -230.97 | -230.97 |
| H(54) | -133.18 | 0.23    | 279.83  | H(116) | -68.95  | -102.19 | -102.19 |
| C(55) | -130.52 | -133.99 | -236.27 | C(117) | -210.30 | 47.87   | 47.87   |
| C(56) | 130.52  | 133.99  | -236.27 | C(118) | 210.30  | -47.87  | -47.87  |
| H(57) | -212.74 | -63.28  | -248.65 | H(119) | -218.80 | 154.93  | 154.93  |
| H(58) | -60.40  | -118.61 | -318.61 | H(120) | -162.04 | 35.25   | 35.25   |
| H(59) | -171.01 | -235.08 | -245.28 | H(121) | -311.39 | 7.00    | 7.00    |
| H(60) | 212.74  | 63.28   | -248.65 | H(122) | 218.80  | -154.93 | -154.93 |
| H(61) | 60.40   | 118.61  | -318.61 | H(123) | 162.04  | -35.25  | -35.25  |
| H(62) | 171.01  | 235.08  | -245.28 | H(124) | 311.39  | -7.00   | -7.00   |

| <b>2c</b> |          |          |          | <b>2d</b> |          |          |          |
|-----------|----------|----------|----------|-----------|----------|----------|----------|
|           | <i>x</i> | <i>y</i> | <i>z</i> |           | <i>x</i> | <i>y</i> | <i>z</i> |
| Si(125)   | 5.36     | 118.66   | -13.72   | Si(187)   | -108.30  | -50.88   | -20.58   |
| Si(126)   | -5.36    | -118.66  | -13.72   | Si(188)   | 108.30   | 50.88    | -20.58   |
| Si(127)   | 134.09   | -211.93  | -182.48  | Si(189)   | 108.30   | 233.98   | -172.07  |
| Si(128)   | 70.18    | -215.24  | 189.82   | Si(190)   | 192.74   | 123.71   | 188.88   |
| Si(129)   | -134.09  | 211.93   | -182.48  | Si(191)   | -108.30  | -233.98  | -172.07  |
| Si(130)   | -70.18   | 215.24   | 189.82   | Si(192)   | -192.74  | -123.71  | 188.88   |
| C(131)    | 313.42   | -217.39  | -122.31  | C(193)    | -11.35   | 370.13   | -118.47  |
| H(132)    | 325.49   | -282.87  | -35.83   | H(194)    | 10.22    | 404.77   | -17.17   |
| H(133)    | 378.35   | -254.95  | -201.96  | H(195)    | -2.87    | 456.01   | -185.73  |
| H(134)    | 348.97   | -117.93  | -94.32   | H(196)    | -114.92  | 335.88   | -120.75  |
| C(135)    | 75.56    | -388.25  | -218.58  | C(197)    | 281.57   | 309.56   | -182.69  |
| H(136)    | 140.21   | -435.43  | -293.18  | H(198)    | 285.74   | 381.79   | -264.78  |
| H(137)    | 76.56    | -450.45  | -128.88  | H(199)    | 307.80   | 362.26   | -90.75   |
| H(138)    | -26.36   | -388.14  | -258.05  | H(200)    | 358.07   | 233.74   | -200.93  |
| C(139)    | 134.09   | -117.59  | -346.18  | C(201)    | 61.14    | 176.80   | -346.07  |
| H(140)    | 35.68    | -117.55  | -393.19  | H(202)    | 131.27   | 101.89   | -383.55  |
| H(141)    | 165.24   | -13.73   | -333.30  | H(203)    | -38.74   | 133.02   | -349.18  |

|        |         |         |         |        |         |         |         |
|--------|---------|---------|---------|--------|---------|---------|---------|
| H(142) | 204.31  | -165.25 | -415.27 | H(204) | 62.97   | 261.66  | -415.14 |
| C(143) | -55.94  | -194.47 | 329.35  | C(205) | 196.09  | -16.92  | 315.47  |
| H(144) | -69.18  | -90.30  | 358.62  | H(206) | 96.62   | -50.97  | 343.93  |
| H(145) | -153.68 | -233.73 | 300.17  | H(207) | 250.85  | -102.94 | 276.06  |
| H(146) | -22.81  | -250.01 | 417.62  | H(208) | 247.42  | 16.21   | 406.25  |
| C(147) | 95.13   | -401.69 | 167.33  | C(209) | 373.00  | 176.70  | 165.39  |
| H(148) | 3.45    | -450.46 | 133.27  | H(210) | 433.23  | 94.79   | 125.34  |
| H(149) | 173.69  | -423.76 | 94.82   | H(211) | 382.52  | 261.44  | 97.37   |
| H(150) | 123.73  | -447.36 | 262.56  | H(212) | 416.18  | 205.74  | 261.65  |
| C(151) | 235.27  | -139.72 | 242.70  | C(213) | 96.30   | 270.96  | 257.80  |
| H(152) | 266.34  | -179.73 | 339.67  | H(214) | 129.21  | 294.34  | 359.47  |
| H(153) | 313.74  | -162.58 | 170.34  | H(215) | 113.12  | 359.66  | 196.25  |
| H(154) | 229.11  | -31.17  | 251.72  | H(216) | -11.19  | 252.34  | 260.72  |
| C(155) | -313.42 | 217.39  | -122.31 | C(217) | 11.35   | -370.13 | -118.47 |
| H(156) | -378.35 | 254.95  | -201.96 | H(218) | 2.87    | -456.01 | -185.73 |
| H(157) | -348.97 | 117.93  | -94.32  | H(219) | 114.92  | -335.88 | -120.75 |
| H(158) | -325.49 | 282.87  | -35.83  | H(220) | -10.22  | -404.77 | -17.17  |
| C(159) | -75.56  | 388.25  | -218.58 | C(221) | -281.57 | -309.56 | -182.69 |
| H(160) | -76.56  | 450.45  | -128.88 | H(222) | -307.80 | -362.26 | -90.75  |
| H(161) | 26.36   | 388.14  | -258.05 | H(223) | -358.07 | -233.74 | -200.93 |
| H(162) | -140.21 | 435.43  | -293.18 | H(224) | -285.74 | -381.79 | -264.78 |
| C(163) | -134.09 | 117.59  | -346.18 | C(225) | -61.14  | -176.80 | -346.07 |
| H(164) | -204.31 | 165.25  | -415.27 | H(226) | -62.97  | -261.66 | -415.14 |
| H(165) | -35.68  | 117.55  | -393.19 | H(227) | -131.27 | -101.89 | -383.55 |
| H(166) | -165.24 | 13.73   | -333.30 | H(228) | 38.74   | -133.02 | -349.18 |
| C(167) | 55.94   | 194.47  | 329.35  | C(229) | -196.09 | 16.92   | 315.47  |
| H(168) | 69.18   | 90.30   | 358.62  | H(230) | -96.62  | 50.97   | 343.93  |
| H(169) | 153.68  | 233.73  | 300.17  | H(231) | -250.85 | 102.94  | 276.06  |
| H(170) | 22.81   | 250.01  | 417.62  | H(232) | -247.42 | -16.21  | 406.25  |
| C(171) | -95.13  | 401.69  | 167.33  | C(233) | -373.00 | -176.70 | 165.39  |
| H(172) | -3.45   | 450.46  | 133.27  | H(234) | -433.23 | -94.79  | 125.34  |
| H(173) | -173.69 | 423.76  | 94.82   | H(235) | -382.52 | -261.44 | 97.37   |
| H(174) | -123.73 | 447.36  | 262.56  | H(236) | -416.18 | -205.74 | 261.65  |
| C(175) | -235.27 | 139.72  | 242.70  | C(237) | -96.30  | -270.96 | 257.80  |
| H(176) | -266.34 | 179.73  | 339.67  | H(238) | -129.21 | -294.34 | 359.47  |
| H(177) | -313.74 | 162.58  | 170.34  | H(239) | -113.12 | -359.66 | 196.25  |
| H(178) | -229.11 | 31.17   | 251.72  | H(240) | 11.19   | -252.34 | 260.72  |
| C(179) | 186.71  | 172.37  | -42.46  | C(241) | -238.80 | 74.36   | -84.10  |
| C(180) | -186.71 | -172.37 | -42.46  | C(242) | 238.80  | -74.36  | -84.10  |
| H(181) | 251.75  | 132.62  | 35.80   | H(243) | -246.75 | 160.45  | -17.39  |
| H(182) | 223.98  | 136.05  | -138.47 | H(244) | -214.42 | 111.33  | -183.84 |
| H(183) | 195.85  | 281.23  | -41.88  | H(245) | -337.03 | 26.76   | -88.97  |
| H(184) | -251.75 | -132.62 | 35.80   | H(246) | 246.75  | -160.45 | -17.39  |

|        |         |         |         |        |        |         |         |
|--------|---------|---------|---------|--------|--------|---------|---------|
| H(185) | -223.98 | -136.05 | -138.47 | H(247) | 214.42 | -111.33 | -183.84 |
| H(186) | -195.85 | -281.23 | -41.88  | H(248) | 337.03 | -26.76  | -88.97  |

<sup>a</sup> Calculated sums of electronic and thermal free energies (ZPE corrected) using B3LYP/6-311G(2d,p) = -2295.89809 (**2a**), -2295.897428 (**2b**), -2295.896297 (**2c**), and -2295.895136 (**2d**) Hartrees.

### Model descriptions for use in GED refinements

Similar models were used to describe both **1** and **2**, with all conformers constructed assuming  $C_2$  symmetry in accordance with the calculations. For simplicity this description details the model for the most abundant conformer (**a**) of each molecule, and hence the atom numbering describes this conformer (see Figure 1). The numbering of subsequent conformers can be obtained by adding multiples of 56 for **1**, and 62 for **2**. All methyl groups are constructed assuming local  $C_3$  symmetry

The model consists of 31 parameters for **1** and 32 parameters for **2**, with the additional parameter being used to describe the methyl group in **2**. All parameters apply to each conformer, except for the  $\phi_{\text{RSiSiR}}$  dihedral angle, which is unique to a given conformer.

The silicon backbone was modelled using an  $r_{\text{Si-Si}}$  mean distance and the  $\angle\text{Si(1)Si(2)Si(5)}$  and  $\angle\text{Si(1)Si(2)Si(6)}$  angles. The differences in Si-Si distances were accounted for by using fixed (non-refinable) differences as follows.

Distance corrections for **1a** applied to parameter 1 in Table S6:

$$\begin{aligned} r_{\text{Si(1)-Si(2)}} &= r_{\text{Si-Si mean}} + 0.5 \text{ pm} \\ r_{\text{Si(1)-Si(5)}} &= r_{\text{Si-Si mean}} - 0.1 \text{ pm} \\ r_{\text{Si(1)-Si(6)}} &= r_{\text{Si-Si mean}} - 0.1 \text{ pm} \end{aligned}$$

Distance corrections for **2a** applied to parameters in Table S7:

$$\begin{aligned} r_{\text{Si(1)-Si(2)}} &= r_{\text{Si-Si mean}} + 0.4 \text{ pm} \\ r_{\text{Si(1)-Si(5)}} &= r_{\text{Si-Si mean}} - 0.3 \text{ pm} \\ r_{\text{Si(1)-Si(6)}} &= r_{\text{Si-Si mean}} \end{aligned}$$

These differences were determined from calculations at the B3LYP/6-311G(2d,p) level of theory. The central hydrogen atoms (**1**) or carbon atoms for the methyl groups (**2**) were positioned using the  $r_{\text{Si(1)-R(55)}}$  distance and the  $r_{\text{R(55)Si(1)Si(2)}}$  angle. For **2** the methyl groups are constructed using the  $r_{\text{C-H}}$  mean distance and the  $\phi_{\text{Si(2)Si(1)C(55)H(59)}}$

dihedral angle. The C–H distance was found to be shorter than for the C–H distances in the trimethylsilyl groups, and so a fixed difference of –0.1 pm was applied.

The trimethylsilyl branch on Si(5) was constructed using the parameters  $r_{\text{Si-C}}$  mean,  $r_{\text{C-H}}$  mean,  $\angle\text{SiCH}$  mean, and the dihedral angles  $\phi_{\text{Si(1)Si(5)C(31)H(32)}}$ ,  $\phi_{\text{Si(1)Si(5)C(35)H(36)}}$ ,  $\phi_{\text{Si(1)Si(5)C(39)H(40)}}$ , for the methyl groups based on C(31), C(35), and C(39), respectively.

The methyl groups were oriented with respect to the backbone using angles  $\angle\text{Si(1)Si(5)C(31)}$ ,  $\angle\text{Si(1)Si(5)C(35)}$ , and  $\angle\text{Si(1)Si(5)C(39)}$ , and were positioned with respect to each other using angles  $\angle\text{C(31)Si(5)C(35)}$  and  $\angle\text{C(31)Si(5)C(39)}$ . The group was then oriented to the central Si–Si bond using the dihedral angle  $\phi_{\text{Si(2)Si(1)Si(5)C(31)}}$ . The same method was used to construct the trimethylsilyl branch on Si(6), again using  $r_{\text{Si-C}}$  mean,  $r_{\text{C-H}}$  mean,  $\angle\text{SiCH}$  mean, and the dihedral angles  $\phi_{\text{Si(1)Si(6)C(43)H(44)}}$ ,  $\phi_{\text{Si(1)Si(6)C(47)H(48)}}$ , and  $\phi_{\text{Si(1)Si(6)C(51)H(52)}}$  for the methyl groups based on C(43), C(47) and C(51), respectively. The methyl groups were oriented with respect to the backbone using angles  $\angle\text{Si(1)Si(6)C(43)}$ ,  $\angle\text{Si(1)Si(6)C(47)}$ , and  $\angle\text{Si(1)Si(6)C(51)}$ , and were positioned with respect to each other using angles  $\angle\text{C(43)Si(6)C(47)}$  and  $\angle\text{C(43)Si(6)C(51)}$ . The group was then oriented to the central Si–Si bond using the dihedral angle  $\phi_{\text{Si(2)Si(1)Si(6)C(43)}}$ . The differences in Si–C distances observed in the calculations [B3LYP/6-311G(2d,p)] are accounted for using the fixed (non-refinable) differences listed below.

Distance corrections for **1a** applied to parameter 2 in Table S6:

$$\begin{aligned}r_{\text{Si(5)-C(35)}} &= r_{\text{Si-C}} \text{ mean} + 0.1 \text{ pm} \\r_{\text{Si(5)-C(35)}} &= r_{\text{Si-C}} \text{ mean} + 0.1 \text{ pm} \\r_{\text{Si(5)-C(39)}} &= r_{\text{Si-C}} \text{ mean} + 0.1 \text{ pm} \\r_{\text{Si(6)-C(43)}} &= r_{\text{Si-C}} \text{ mean} - 0.1 \text{ pm} \\r_{\text{Si(6)-C(47)}} &= r_{\text{Si-C}} \text{ mean} + 0.2 \text{ pm} \\r_{\text{Si(6)-C(51)}} &= r_{\text{Si-C}} \text{ mean} - 0.1 \text{ pm}\end{aligned}$$

Distance corrections for **2a** applied to parameters in Table S7:

$$\begin{aligned}r_{\text{Si(6)-C(47)}} &= r_{\text{Si-C}} \text{ mean} + 0.2 \text{ pm} \\r_{\text{Si(6)-C(51)}} &= r_{\text{Si-C}} \text{ mean} - 0.4 \text{ pm}\end{aligned}$$



The two halves of the molecule separated by the Si(1)–Si(2) bond are identical, and are related by  $C_2$  symmetry. They are oriented with respect to one another using dihedral angles specific to each conformer [ $\phi_{R(55)Si(2)Si(1)R(56)}$  for the most abundant conformer].

The less abundant conformers are modeled using the same method; the only parameter that is different for each conformer is the central dihedral angle [ $\phi_{RSiSiR}$ ]. Fixed (non-refinable) differences are applied to account for slight differences in bond lengths and angles between individual conformers and the most abundant conformer. These values are found by comparing the calculated structure of the conformers using B3LYP/6-311G(2d,p) level of theory (coordinates in Tables S4 and S5).

**Table S8** Refined ( $r_{hl}$ ) and calculated ( $r_e$ ) parameters values and their SARACEN restraints used in the three-conformer least-squares refinement of **1**.<sup>a</sup>

|          | Parameter                           | $r_{hl}$ <sup>b</sup>      | $r_e$ <sup>c</sup> | Restraint |
|----------|-------------------------------------|----------------------------|--------------------|-----------|
| $p_1$    | $r_{Si-Si}$ mean                    | 236.7(1)                   | 237.4              | —         |
| $p_2$    | $r_{Si-C}$ mean                     | 188.8(1)                   | 188.9              | —         |
| $p_3$    | $r_{Si(1)-H(55)}$                   | 150.1(17)                  | 149.8              | 2.2       |
| $p_4$    | $r_{C-H}$ mean                      | 109.1(2)                   | 109.3              | 0.9       |
| $p_5$    | $\angle Si(2)Si(1)Si(6)$            | 110.6(8)                   | 108.9              | 0.9       |
| $p_6$    | $\angle Si(2)Si(1)Si(5)$            | 117.1(5)                   | 116.3              | 0.5       |
| $p_7$    | $\angle H(55)Si(1)Si(2)$            | 106.0(6)                   | 106.4              | 0.6       |
| $p_8$    | $\angle SiCH$ mean                  | 111.8(3)                   | 111.1              | 0.6       |
| $p_9$    | $\angle Si(1)Si(5)C(31)$            | 112.4(4)                   | 112.2              | 0.4       |
| $p_{10}$ | $\angle Si(1)Si(5)C(35)$            | 112.5(6)                   | 112.2              | 0.6       |
| $p_{11}$ | $\angle Si(1)Si(5)C(39)$            | 108.5(5)                   | 108.4              | 0.5       |
| $p_{12}$ | $\angle C(31)Si(5)C(35)$            | 109.1(2)                   | 109.1              | 0.2       |
| $p_{13}$ | $\angle C(31)Si(5)C(39)$            | 108.4(2)                   | 108.4              | 0.2       |
| $p_{14}$ | $\angle Si(1)Si(6)C(43)$            | 108.8(5)                   | 108.7              | 0.2       |
| $p_{15}$ | $\angle Si(1)Si(6)C(47)$            | 111.4(5)                   | 111.5              | 0.6       |
| $p_{16}$ | $\angle Si(1)Si(6)C(51)$            | 110.2(4)                   | 110.0              | 0.4       |
| $p_{17}$ | $\angle C(43)Si(6)C(47)$            | 111.5(3)                   | 109.2              | 0.3       |
| $p_{18}$ | $\angle C(43)Si(6)C(51)$            | 109.0(1)                   | 109.0              | 0.1       |
| $p_{19}$ | $\angle H(55)Si(1)Si(5)$            | 103.9(10)                  | 105.7              | 1.2       |
| $p_{20}$ | $\angle H(55)Si(1)Si(6)$            | 104.3(9)                   | 106.5              | 1.3       |
| $p_{21}$ | $\phi_{Si(2)Si(1)Si(5)C(31)}$       | -51.2(12)                  | -51.0              | 1.2       |
| $p_{22}$ | $\phi_{Si(2)Si(1)Si(6)C(43)}$       | 69.6(19)                   | 66.0               | 5.4       |
| $p_{23}$ | $\phi_{H(56)Si(2)Si(1)H(55)}$       | 87.4(17)                   | 87.1               | 1.7       |
| $p_{24}$ | $\phi_{H(112)Si(58)Si(57)H(111)}$   | -116.2(44)                 | -120.7             | 5.0       |
| $p_{25}$ | $\phi_{H(168)Si(114)Si(113)H(167)}$ | -53.8(42)                  | -49.5              | 4.0       |
| $p_{26}$ | $\phi_{Si(1)Si(5)C(31)H(32)}$       | 178.1(9)                   | 178.2              | 0.9       |
| $p_{27}$ | $\phi_{Si(1)Si(5)C(35)H(36)}$       | -65.2(7)                   | -65.2              | 0.7       |
| $p_{28}$ | $\phi_{Si(1)Si(5)C(39)H(40)}$       | 178.5(16)                  | 178.6              | 1.6       |
| $p_{29}$ | $\phi_{Si(1)Si(6)C(43)H(44)}$       | -58.0(7)                   | -58.0              | 0.7       |
| $p_{30}$ | $\phi_{Si(1)Si(6)C(47)H(48)}$       | -54.2(7)                   | -54.2              | 0.7       |
| $p_{31}$ | $\phi_{Si(1)Si(6)C(51)H(52)}$       | -179.9(8)                  | -179.9             | 0.8       |
| $f_1$    | Amount of conformer <b>1a</b>       | 0.592(100)% <sup>d</sup>   | 0.527              | —         |
| $f_2$    | Amount of conformer <b>1b</b>       | 0.300(100)% <sup>d</sup>   | 0.365              | —         |
| $f_3$    | Amount of conformer <b>1c</b>       | 0.108(fixed)% <sup>d</sup> | 0.108              | —         |

<sup>a</sup> Distances ( $r$ ) are in pm, angles ( $\angle$ ) and dihedral angles ( $\phi$ ) are in degrees. See Figure 1 for atom numbering. <sup>b</sup> Uncertainties for parameters  $p_1$ – $p_{31}$  represent  $1\sigma$ . <sup>c</sup> Calculated using B3LYP-GD3/6-311G(2d,p). <sup>d</sup> Uncertainties in conformer amounts obtained from Figure S1, and values in parentheses are approximately equal to  $2\sigma$ .

**Table S9** Refined ( $r_{hl}$ ) and calculated ( $r_e$ ) parameters values and their SARACEN restraints used in the three-conformer least-squares refinement of **2**.<sup>a</sup>

|          | Parameter                           | $r_{hl}$ <sup>b</sup>   | $r_e$ <sup>c</sup> | Restraint |
|----------|-------------------------------------|-------------------------|--------------------|-----------|
| $p_1$    | $r_{Si-Si}$ mean                    | 236.5(1)                | 237.7              | —         |
| $p_2$    | $r_{Si-C}$ mean                     | 188.0(2)                | 189.2              | —         |
| $p_3$    | $r_{Si(1)-C(55)}$                   | 193.3(19)               | 191.7              | —         |
| $p_4$    | $r_{C-H}$ mean                      | 109.9(2)                | 109.3              | 0.3       |
| $p_5$    | $\angle Si(1)Si(2)Si(6)$            | 117.9(4)                | 116.3              | 0.5       |
| $p_6$    | $\angle Si(1)Si(2)Si(5)$            | 113.5(8)                | 111.3              | —         |
| $p_7$    | $\angle C(55)Si(1)Si(2)$            | 103.8(6)                | 106.2              | 1.0       |
| $p_8$    | $\angle SiCH$ mean                  | 112.0(4)                | 111.1              | —         |
| $p_9$    | $\angle Si(1)Si(5)C(31)$            | 111.7(8)                | 110.7              | 0.8       |
| $p_{10}$ | $\angle Si(1)Si(5)C(35)$            | 109.7(7)                | 109.4              | 0.8       |
| $p_{11}$ | $\angle Si(1)Si(5)C(39)$            | 112.2(7)                | 111.3              | 0.7       |
| $p_{12}$ | $\angle C(31)Si(5)C(35)$            | 107.8(4)                | 108.7              | 0.4       |
| $p_{13}$ | $\angle C(31)Si(5)C(39)$            | 109.6(4)                | 109.5              | 0.4       |
| $p_{14}$ | $\angle Si(1)Si(6)C(43)$            | 112.3(7)                | 111.0              | 0.8       |
| $p_{15}$ | $\angle Si(1)Si(6)C(47)$            | 108.9(3)                | 108.8              | 0.3       |
| $p_{16}$ | $\angle Si(1)Si(6)C(51)$            | 113.4(4)                | 113.1              | 0.4       |
| $p_{17}$ | $\angle C(43)Si(6)C(47)$            | 107.4(5)                | 107.3              | 0.5       |
| $p_{18}$ | $\angle C(43)Si(6)C(51)$            | 108.6(1)                | 108.6              | 0.1       |
| $p_{19}$ | $\angle C(55)Si(1)Si(5)$            | 106.2(7)                | 104.8              | 0.7       |
| $p_{20}$ | $\angle C(55)Si(1)Si(6)$            | 107.0(2)                | 107.0              | 0.2       |
| $p_{21}$ | $\phi_{Si(2)Si(1)Si(5)C(31)}$       | 79.0(19)                | 80.4               | 2.0       |
| $p_{22}$ | $\phi_{Si(2)Si(1)Si(6)C(43)}$       | 65.9(32)                | 73.4               | 3.9       |
| $p_{23}$ | $\phi_{C(56)Si(2)Si(1)C(55)}$       | -47.0(6)                | -46.4              | 0.6       |
| $p_{24}$ | $\phi_{C(118)Si(64)Si(63)C(117)}$   | -73.3(26)               | -81.0              | 3.0       |
| $p_{25}$ | $\phi_{C(180)Si(126)Si(125)C(179)}$ | -161.9(15)              | -151.7             | 1.5       |
| $p_{26}$ | $\phi_{Si(1)Si(5)C(31)H(32)}$       | -178.4(20)              | -178.5             | 2.0       |
| $p_{27}$ | $\phi_{Si(1)Si(5)C(35)H(36)}$       | -60.9(22)               | -60.8              | 2.2       |
| $p_{28}$ | $\phi_{Si(1)Si(5)C(39)H(40)}$       | 177.0(10)               | 177.1              | 1.0       |
| $p_{29}$ | $\phi_{Si(1)Si(6)C(43)H(44)}$       | -68.2(8)                | -68.3              | 0.8       |
| $p_{30}$ | $\phi_{Si(1)Si(6)C(47)H(48)}$       | -54.6(3)                | -54.6              | 0.3       |
| $p_{31}$ | $\phi_{Si(1)Si(6)C(51)H(52)}$       | -179.0(20)              | -178.9             | 2.0       |
| $p_{32}$ | $\phi_{Si(2)Si(1)C(55)H(57)}$       | -61.3(20)               | -61.3              | 2.0       |
| $f_1$    | Amount of conformer <b>2a</b>       | 0.411(150) <sup>d</sup> | 0.535              | —         |
| $f_2$    | Amount of conformer <b>2b</b>       | 0.450(150) <sup>d</sup> | 0.326              | —         |
| $f_3$    | Amount of conformer <b>2c</b>       | 0.139(fixed)            | 0.139              | —         |

<sup>a</sup> Distances ( $r$ ) are in pm, angles ( $\angle$ ) and dihedral angles ( $\phi$ ) are in degrees. See Figure 1 for atom numbering. <sup>b</sup> Uncertainties for parameters  $p_1$ – $p_{32}$  represent  $1\sigma$ . <sup>c</sup> Calculated using B3LYP-GD3/6-311G(2d,p). <sup>d</sup> Uncertainties in conformer amounts obtained from Figure S1, and values in parentheses are approximately equal to  $2\sigma$ .

**Table S10** Interatomic distances ( $r_a$  / pm), refined and calculated amplitudes of vibration ( $u_{h1}$  / pm) and perpendicular corrections ( $k_{h1}$  / pm) for the SARACEN-restrained GED structure of **1**.

|          | Atom pair     | $r_a$    | $u_{h1}$ (GED)         | Restraint | $k_{h1}$ | $u_{h1}$ (calc.) |
|----------|---------------|----------|------------------------|-----------|----------|------------------|
| $u_{18}$ | C(23)-H(24)   | 108.7(2) | 9.5(2)                 | 8.2(8)    | 0.4      | 8.2              |
| $u_8$    | C(27)-H(30)   | 108.7(2) | 9.5(tied to $u_{18}$ ) | —         | 0.4      | 8.2              |
| $u_{26}$ | C(19)-H(21)   | 108.7(2) | 9.5(tied to $u_{18}$ ) | —         | 0.4      | 8.2              |
| $u_{15}$ | C(23)-H(25)   | 108.7(2) | 9.4(tied to $u_{18}$ ) | —         | 0.4      | 8.1              |
| $u_{10}$ | C(19)-H(20)   | 108.7(2) | 9.4(tied to $u_{18}$ ) | —         | 0.4      | 8.0              |
| $u_{19}$ | C(47)-H(48)   | 108.8(2) | 9.0(tied to $u_{18}$ ) | —         | 0.4      | 7.8              |
| $u_{24}$ | C(135)-H(136) | 108.8(2) | 9.0(tied to $u_{18}$ ) | —         | 0.4      | 7.7              |
| $u_{32}$ | C(131)-H(133) | 108.8(2) | 9.0(tied to $u_{18}$ ) | —         | 0.4      | 7.7              |
| $u_{13}$ | C(135)-H(137) | 108.8(2) | 9.0(tied to $u_{18}$ ) | —         | 0.4      | 7.7              |
| $u_{31}$ | C(127)-H(128) | 108.8(2) | 8.9(tied to $u_{18}$ ) | —         | 0.4      | 7.7              |
| $u_{29}$ | C(71)-H(72)   | 108.8(2) | 8.9(tied to $u_{18}$ ) | —         | 0.4      | 7.7              |
| $u_{21}$ | C(67)-H(69)   | 108.8(2) | 8.9(tied to $u_{18}$ ) | —         | 0.4      | 7.7              |
| $u_{25}$ | C(7)-H(10)    | 108.8(2) | 8.9(tied to $u_{18}$ ) | —         | 0.4      | 7.7              |
| $u_{23}$ | C(123)-H(126) | 108.8(2) | 8.9(tied to $u_{18}$ ) | —         | 0.4      | 7.7              |
| $u_4$    | C(15)-H(16)   | 108.8(2) | 8.9(tied to $u_{18}$ ) | —         | 0.4      | 7.7              |
| $u_{22}$ | C(79)-H(80)   | 108.8(2) | 8.9(tied to $u_{18}$ ) | —         | 0.4      | 7.7              |
| $u_{33}$ | C(11)-H(14)   | 108.8(2) | 8.9(tied to $u_{18}$ ) | —         | 0.4      | 7.7              |
| $u_{12}$ | C(11)-H(13)   | 108.8(2) | 8.9(tied to $u_{18}$ ) | —         | 0.4      | 7.7              |
| $u_{17}$ | C(119)-H(122) | 108.8(2) | 8.9(tied to $u_{18}$ ) | —         | 0.4      | 7.7              |
| $u_{11}$ | C(71)-H(73)   | 108.8(2) | 8.9(tied to $u_{18}$ ) | —         | 0.4      | 7.7              |
| $u_5$    | C(75)-H(76)   | 108.8(2) | 8.9(tied to $u_{18}$ ) | —         | 0.4      | 7.7              |
| $u_6$    | C(123)-H(125) | 108.8(2) | 8.9(tied to $u_{18}$ ) | —         | 0.4      | 7.7              |
| $u_3$    | C(131)-H(132) | 108.8(2) | 8.9(tied to $u_{18}$ ) | —         | 0.4      | 7.7              |
| $u_{14}$ | C(79)-H(81)   | 108.8(2) | 8.9(tied to $u_{18}$ ) | —         | 0.4      | 7.7              |
| $u_1$    | C(7)-H(8)     | 108.8(2) | 8.9(tied to $u_{18}$ ) | —         | 0.4      | 7.7              |
| $u_9$    | C(83)-H(86)   | 108.8(2) | 8.9(tied to $u_{18}$ ) | —         | 0.4      | 7.7              |
| $u_2$    | C(127)-H(129) | 108.8(2) | 8.9(tied to $u_{18}$ ) | —         | 0.4      | 7.7              |
| $u_7$    | C(139)-H(142) | 108.8(2) | 8.9(tied to $u_{18}$ ) | —         | 0.4      | 7.7              |
| $u_{50}$ | C(127)-H(130) | 108.8(2) | 9.0(tied to $u_{18}$ ) | —         | 0.4      | 7.7              |
| $u_{47}$ | C(71)-H(74)   | 108.8(2) | 9.0(tied to $u_{18}$ ) | —         | 0.4      | 7.7              |
| $u_{46}$ | C(67)-H(68)   | 108.8(2) | 9.0(tied to $u_{18}$ ) | —         | 0.4      | 7.7              |
| $u_{53}$ | C(131)-H(134) | 108.8(2) | 9.0(tied to $u_{18}$ ) | —         | 0.4      | 7.7              |
| $u_{54}$ | C(135)-H(138) | 108.8(2) | 9.0(tied to $u_{18}$ ) | —         | 0.4      | 7.7              |
| $u_{52}$ | C(123)-H(124) | 108.8(2) | 9.0(tied to $u_{18}$ ) | —         | 0.4      | 7.7              |
| $u_{42}$ | C(139)-H(140) | 108.8(2) | 9.0(tied to $u_{18}$ ) | —         | 0.4      | 7.7              |
| $u_{51}$ | C(15)-H(18)   | 108.8(2) | 9.0(tied to $u_{18}$ ) | —         | 0.4      | 7.7              |
| $u_{38}$ | C(35)-H(38)   | 108.8(2) | 9.0(tied to $u_{18}$ ) | —         | 0.4      | 7.7              |
| $u_{41}$ | C(119)-H(121) | 108.8(2) | 9.0(tied to $u_{18}$ ) | —         | 0.4      | 7.7              |
| $u_{37}$ | C(11)-H(12)   | 108.8(2) | 9.0(tied to $u_{18}$ ) | —         | 0.4      | 7.7              |
| $u_{43}$ | C(7)-H(9)     | 108.8(2) | 9.0(tied to $u_{18}$ ) | —         | 0.4      | 7.7              |
| $u_{44}$ | C(23)-H(26)   | 108.8(2) | 9.0(tied to $u_{18}$ ) | —         | 0.4      | 7.7              |
| $u_{49}$ | C(79)-H(82)   | 108.8(2) | 9.0(tied to $u_{18}$ ) | —         | 0.4      | 7.7              |

|                         |                 |           |                                      |        |      |      |
|-------------------------|-----------------|-----------|--------------------------------------|--------|------|------|
| <i>u</i> <sub>40</sub>  | C(83)-H(84)     | 108.8(2)  | 9.0(tied to <i>u</i> <sub>18</sub> ) | —      | 0.4  | 7.7  |
| <i>u</i> <sub>45</sub>  | C(43)-H(46)     | 108.8(2)  | 9.0(tied to <i>u</i> <sub>18</sub> ) | —      | 0.4  | 7.7  |
| <i>u</i> <sub>39</sub>  | C(63)-H(65)     | 108.8(2)  | 9.0(tied to <i>u</i> <sub>18</sub> ) | —      | 0.4  | 7.7  |
| <i>u</i> <sub>48</sub>  | C(75)-H(78)     | 108.8(2)  | 9.0(tied to <i>u</i> <sub>18</sub> ) | —      | 0.4  | 7.7  |
| <i>u</i> <sub>36</sub>  | C(119)-H(120)   | 108.8(2)  | 8.9(tied to <i>u</i> <sub>18</sub> ) | —      | 0.4  | 7.7  |
| <i>u</i> <sub>16</sub>  | C(75)-H(77)     | 108.8(2)  | 8.9(tied to <i>u</i> <sub>18</sub> ) | —      | 0.4  | 7.7  |
| <i>u</i> <sub>34</sub>  | C(67)-H(70)     | 108.8(2)  | 8.9(tied to <i>u</i> <sub>18</sub> ) | —      | 0.4  | 7.7  |
| <i>u</i> <sub>20</sub>  | C(63)-H(64)     | 108.8(2)  | 8.9(tied to <i>u</i> <sub>18</sub> ) | —      | 0.4  | 7.7  |
| <i>u</i> <sub>27</sub>  | C(39)-H(42)     | 108.8(2)  | 8.9(tied to <i>u</i> <sub>18</sub> ) | —      | 0.4  | 7.7  |
| <i>u</i> <sub>30</sub>  | C(83)-H(85)     | 108.8(2)  | 8.9(tied to <i>u</i> <sub>18</sub> ) | —      | 0.4  | 7.7  |
| <i>u</i> <sub>35</sub>  | C(139)-H(141)   | 108.8(2)  | 8.9(tied to <i>u</i> <sub>18</sub> ) | —      | 0.4  | 7.7  |
| <i>u</i> <sub>28</sub>  | C(63)-H(66)     | 108.8(2)  | 8.9(tied to <i>u</i> <sub>18</sub> ) | —      | 0.4  | 7.7  |
| <i>u</i> <sub>55</sub>  | Si(113)-H(167)  | 150.0(17) | 9.0(tied to <i>u</i> <sub>57</sub> ) | —      | 0.4  | 9.0  |
| <i>u</i> <sub>56</sub>  | Si(57)-H(111)   | 150.0(17) | 8.9(tied to <i>u</i> <sub>57</sub> ) | —      | 0.4  | 9.0  |
| <i>u</i> <sub>57</sub>  | Si(1)-H(55)     | 150.1(17) | 8.9(9)                               | 9.0(1) | 0.4  | 9.0  |
| <i>u</i> <sub>74</sub>  | H(29)...H(30)   | 174.0(6)  | 13.3(fixed)                          | —      | -0.5 | 13.3 |
| <i>u</i> <sub>90</sub>  | H(24)...H(25)   | 174.1(6)  | 13.2(fixed)                          | —      | -0.4 | 13.2 |
| <i>u</i> <sub>84</sub>  | H(20)...H(21)   | 174.1(6)  | 13.1(fixed)                          | —      | -0.4 | 13.1 |
| <i>u</i> <sub>85</sub>  | H(44)...H(45)   | 174.2(6)  | 12.7(fixed)                          | —      | -0.4 | 12.7 |
| <i>u</i> <sub>87</sub>  | H(141)...H(142) | 174.3(6)  | 12.6(fixed)                          | —      | -0.3 | 12.6 |
| <i>u</i> <sub>96</sub>  | H(136)...H(137) | 174.4(6)  | 12.6(fixed)                          | —      | -0.2 | 12.6 |
| <i>u</i> <sub>81</sub>  | H(132)...H(133) | 174.4(6)  | 12.6(fixed)                          | —      | -0.2 | 12.6 |
| <i>u</i> <sub>91</sub>  | H(69)...H(70)   | 174.4(6)  | 12.6(fixed)                          | —      | -0.2 | 12.6 |
| <i>u</i> <sub>63</sub>  | H(16)...H(17)   | 174.4(6)  | 12.6(fixed)                          | —      | -0.2 | 12.6 |
| <i>u</i> <sub>99</sub>  | H(17)...H(18)   | 174.4(6)  | 12.6(fixed)                          | —      | -0.2 | 12.6 |
| <i>u</i> <sub>73</sub>  | H(13)...H(14)   | 174.4(6)  | 12.6(fixed)                          | —      | -0.2 | 12.6 |
| <i>u</i> <sub>68</sub>  | H(120)...H(122) | 174.4(6)  | 12.6(fixed)                          | —      | -0.2 | 12.6 |
| <i>u</i> <sub>94</sub>  | H(16)...H(18)   | 174.4(6)  | 12.6(fixed)                          | —      | -0.2 | 12.6 |
| <i>u</i> <sub>102</sub> | H(64)...H(66)   | 174.4(6)  | 12.5(fixed)                          | —      | -0.2 | 12.5 |
| <i>u</i> <sub>100</sub> | H(81)...H(82)   | 174.4(6)  | 12.6(fixed)                          | —      | -0.2 | 12.6 |
| <i>u</i> <sub>61</sub>  | H(132)...H(134) | 174.4(6)  | 12.6(fixed)                          | —      | -0.2 | 12.6 |
| <i>u</i> <sub>65</sub>  | H(120)...H(121) | 174.4(6)  | 12.6(fixed)                          | —      | -0.2 | 12.6 |
| <i>u</i> <sub>70</sub>  | H(125)...H(126) | 174.4(6)  | 12.6(fixed)                          | —      | -0.2 | 12.6 |
| <i>u</i> <sub>98</sub>  | H(77)...H(78)   | 174.4(6)  | 12.6(fixed)                          | —      | -0.2 | 12.6 |
| <i>u</i> <sub>80</sub>  | H(65)...H(66)   | 174.4(6)  | 12.5(fixed)                          | —      | -0.2 | 12.5 |
| <i>u</i> <sub>71</sub>  | H(68)...H(69)   | 174.4(6)  | 12.6(fixed)                          | —      | -0.2 | 12.6 |
| <i>u</i> <sub>64</sub>  | H(80)...H(81)   | 174.4(6)  | 12.6(fixed)                          | —      | -0.2 | 12.6 |
| <i>u</i> <sub>104</sub> | H(124)...H(126) | 174.4(6)  | 12.6(fixed)                          | —      | -0.2 | 12.6 |
| <i>u</i> <sub>110</sub> | H(80)...H(82)   | 174.4(6)  | 12.6(fixed)                          | —      | -0.2 | 12.6 |
| <i>u</i> <sub>76</sub>  | H(76)...H(78)   | 174.4(6)  | 12.6(fixed)                          | —      | -0.2 | 12.6 |
| <i>u</i> <sub>77</sub>  | H(84)...H(86)   | 174.4(6)  | 12.6(fixed)                          | —      | -0.2 | 12.6 |
| <i>u</i> <sub>86</sub>  | H(76)...H(77)   | 174.4(6)  | 12.6(fixed)                          | —      | -0.2 | 12.6 |
| <i>u</i> <sub>66</sub>  | H(121)...H(122) | 174.4(6)  | 12.6(fixed)                          | —      | -0.2 | 12.6 |
| <i>u</i> <sub>72</sub>  | H(84)...H(85)   | 174.4(6)  | 12.6(fixed)                          | —      | -0.2 | 12.6 |
| <i>u</i> <sub>101</sub> | H(8)...H(9)     | 174.4(6)  | 12.6(fixed)                          | —      | -0.2 | 12.6 |
| <i>u</i> <sub>103</sub> | H(124)...H(125) | 174.4(6)  | 12.6(fixed)                          | —      | -0.2 | 12.6 |

|                         |                 |            |                                       |   |      |      |
|-------------------------|-----------------|------------|---------------------------------------|---|------|------|
| <i>u</i> <sub>58</sub>  | H(8)...H(10)    | 174.4(6)   | 12.6(fixed)                           | — | -0.2 | 12.6 |
| <i>u</i> <sub>62</sub>  | H(85)...H(86)   | 174.4(6)   | 12.6(fixed)                           | — | -0.2 | 12.6 |
| <i>u</i> <sub>60</sub>  | H(128)...H(129) | 174.4(6)   | 12.6(fixed)                           | — | -0.2 | 12.6 |
| <i>u</i> <sub>89</sub>  | H(72)...H(73)   | 174.4(6)   | 12.6(fixed)                           | — | -0.2 | 12.6 |
| <i>u</i> <sub>92</sub>  | H(64)...H(65)   | 174.4(6)   | 12.5(fixed)                           | — | -0.2 | 12.5 |
| <i>u</i> <sub>83</sub>  | H(32)...H(33)   | 174.4(6)   | 12.6(fixed)                           | — | -0.2 | 12.6 |
| <i>u</i> <sub>82</sub>  | H(9)...H(10)    | 174.4(6)   | 12.6(fixed)                           | — | -0.2 | 12.6 |
| <i>u</i> <sub>106</sub> | H(128)...H(130) | 174.4(6)   | 12.6(fixed)                           | — | -0.2 | 12.6 |
| <i>u</i> <sub>79</sub>  | H(140)...H(142) | 174.4(6)   | 12.6(fixed)                           | — | -0.2 | 12.6 |
| <i>u</i> <sub>88</sub>  | H(68)...H(70)   | 174.4(6)   | 12.6(fixed)                           | — | -0.2 | 12.6 |
| <i>u</i> <sub>109</sub> | H(73)...H(74)   | 174.4(6)   | 12.6(fixed)                           | — | -0.2 | 12.6 |
| <i>u</i> <sub>105</sub> | H(129)...H(130) | 174.4(6)   | 12.6(fixed)                           | — | -0.2 | 12.6 |
| <i>u</i> <sub>107</sub> | H(72)...H(74)   | 174.4(6)   | 12.6(fixed)                           | — | -0.2 | 12.6 |
| <i>u</i> <sub>75</sub>  | H(12)...H(14)   | 174.4(6)   | 12.6(fixed)                           | — | -0.2 | 12.6 |
| <i>u</i> <sub>78</sub>  | H(140)...H(141) | 174.4(6)   | 12.6(fixed)                           | — | -0.2 | 12.6 |
| <i>u</i> <sub>59</sub>  | H(12)...H(13)   | 174.4(6)   | 12.6(fixed)                           | — | -0.2 | 12.6 |
| <i>u</i> <sub>95</sub>  | H(133)...H(134) | 174.4(6)   | 12.6(fixed)                           | — | -0.2 | 12.6 |
| <i>u</i> <sub>93</sub>  | H(136)...H(138) | 174.4(6)   | 12.6(fixed)                           | — | -0.2 | 12.6 |
| <i>u</i> <sub>67</sub>  | H(137)...H(138) | 174.5(6)   | 12.6(fixed)                           | — | -0.1 | 12.6 |
| <i>u</i> <sub>111</sub> | H(20)...H(22)   | 174.9(6)   | 13.0(fixed)                           | — | 0.3  | 13.0 |
| <i>u</i> <sub>108</sub> | H(21)...H(22)   | 174.9(6)   | 13.2(fixed)                           | — | 0.4  | 13.2 |
| <i>u</i> <sub>69</sub>  | H(25)...H(26)   | 174.9(6)   | 13.1(fixed)                           | — | 0.4  | 13.1 |
| <i>u</i> <sub>97</sub>  | H(24)...H(26)   | 175.0(6)   | 13.3(fixed)                           | — | 0.5  | 13.3 |
| <i>u</i> <sub>204</sub> | H(69)...H(81)   | 182.2(65)  | 76.2(fixed)                           | — | 25.9 | 76.2 |
| <i>u</i> <sub>130</sub> | H(122)...H(156) | 182.4(84)  | 65.8(fixed)                           | — | 50.4 | 65.8 |
| <i>u</i> <sub>112</sub> | Si(4)-C(27)     | 188.5(1)   | 7.5(1)                                | — | 0.2  | 7.2  |
| <i>u</i> <sub>113</sub> | Si(115)-C(127)  | 188.6(1)   | 6.0(tied to <i>u</i> <sub>112</sub> ) | — | 0.2  | 5.7  |
| <i>u</i> <sub>115</sub> | Si(116)-C(139)  | 188.6(1)   | 6.0(tied to <i>u</i> <sub>112</sub> ) | — | 0.2  | 5.8  |
| <i>u</i> <sub>121</sub> | Si(60)-C(83)    | 188.6(1)   | 6.0(tied to <i>u</i> <sub>112</sub> ) | — | 0.2  | 5.7  |
| <i>u</i> <sub>116</sub> | Si(4)-C(19)     | 188.7(1)   | 7.1(tied to <i>u</i> <sub>112</sub> ) | — | 0.2  | 6.8  |
| <i>u</i> <sub>114</sub> | Si(59)-C(71)    | 188.7(1)   | 6.0(tied to <i>u</i> <sub>112</sub> ) | — | 0.2  | 5.7  |
| <i>u</i> <sub>118</sub> | Si(3)-C(7)      | 188.7(1)   | 6.0(tied to <i>u</i> <sub>112</sub> ) | — | 0.2  | 5.8  |
| <i>u</i> <sub>117</sub> | Si(59)-C(63)    | 188.7(1)   | 6.0(tied to <i>u</i> <sub>112</sub> ) | — | 0.2  | 5.7  |
| <i>u</i> <sub>125</sub> | Si(115)-C(123)  | 188.8(1)   | 6.0(tied to <i>u</i> <sub>112</sub> ) | — | 0.2  | 5.8  |
| <i>u</i> <sub>122</sub> | Si(3)-C(15)     | 188.8(1)   | 6.0(tied to <i>u</i> <sub>112</sub> ) | — | 0.2  | 5.8  |
| <i>u</i> <sub>124</sub> | Si(60)-C(79)    | 188.8(1)   | 6.0(tied to <i>u</i> <sub>112</sub> ) | — | 0.2  | 5.8  |
| <i>u</i> <sub>120</sub> | Si(3)-C(11)     | 188.8(1)   | 6.0(tied to <i>u</i> <sub>112</sub> ) | — | 0.2  | 5.8  |
| <i>u</i> <sub>126</sub> | Si(4)-C(23)     | 188.9(1)   | 7.2(tied to <i>u</i> <sub>112</sub> ) | — | 0.2  | 6.9  |
| <i>u</i> <sub>123</sub> | Si(116)-C(131)  | 188.9(1)   | 6.0(tied to <i>u</i> <sub>112</sub> ) | — | 0.2  | 5.8  |
| <i>u</i> <sub>128</sub> | Si(59)-C(67)    | 188.9(1)   | 6.0(tied to <i>u</i> <sub>112</sub> ) | — | 0.2  | 5.8  |
| <i>u</i> <sub>119</sub> | Si(60)-C(75)    | 188.9(1)   | 6.0(tied to <i>u</i> <sub>112</sub> ) | — | 0.2  | 5.7  |
| <i>u</i> <sub>127</sub> | Si(115)-C(119)  | 189.0(1)   | 6.0(tied to <i>u</i> <sub>112</sub> ) | — | 0.2  | 5.8  |
| <i>u</i> <sub>129</sub> | Si(116)-C(135)  | 189.0(1)   | 6.0(tied to <i>u</i> <sub>112</sub> ) | — | 0.2  | 5.8  |
| <i>u</i> <sub>845</sub> | H(86)...H(110)  | 199.8(327) | 74.3(fixed)                           | — | 16.3 | 74.3 |
| <i>u</i> <sub>212</sub> | H(120)...H(141) | 212.6(70)  | 88.7(fixed)                           | — | 24.3 | 88.7 |
| <i>u</i> <sub>132</sub> | Si(57)-Si(61)   | 236.2(1)   | 7.6(tied to <i>u</i> <sub>133</sub> ) | — | 0.3  | 7.0  |

|                         |                  |           |                                       |   |      |       |
|-------------------------|------------------|-----------|---------------------------------------|---|------|-------|
| <i>u</i> <sub>134</sub> | Si(57)-Si(62)    | 236.4(1)  | 7.6(tied to <i>u</i> <sub>133</sub> ) | — | 0.3  | 7.0   |
| <i>u</i> <sub>133</sub> | Si(1)-Si(5)      | 236.5(1)  | 7.6(1)                                | — | 0.3  | 7.0   |
| <i>u</i> <sub>137</sub> | Si(113)-Si(117)  | 236.5(1)  | 7.6(tied to <i>u</i> <sub>133</sub> ) | — | 0.3  | 7.0   |
| <i>u</i> <sub>135</sub> | Si(1)-Si(6)      | 236.7(1)  | 7.6(tied to <i>u</i> <sub>133</sub> ) | — | 0.3  | 7.0   |
| <i>u</i> <sub>136</sub> | Si(113)-Si(118)  | 237.3(1)  | 7.7(tied to <i>u</i> <sub>133</sub> ) | — | 0.3  | 7.0   |
| <i>u</i> <sub>138</sub> | Si(113)-Si(114)  | 237.5(1)  | 7.8(tied to <i>u</i> <sub>133</sub> ) | — | 0.3  | 7.2   |
| <i>u</i> <sub>140</sub> | Si(1)-Si(2)      | 237.5(1)  | 7.8(tied to <i>u</i> <sub>133</sub> ) | — | 0.3  | 7.2   |
| <i>u</i> <sub>139</sub> | Si(57)-Si(58)    | 237.7(1)  | 7.8(tied to <i>u</i> <sub>133</sub> ) | — | 0.3  | 7.1   |
| <i>u</i> <sub>222</sub> | H(16)...H(24)    | 239.6(87) | 129.0(fixed)                          | — | 47.9 | 129.0 |
| <i>u</i> <sub>181</sub> | Si(4)...H(29)    | 248.8(4)  | 13.8(fixed)                           | — | -0.9 | 13.8  |
| <i>u</i> <sub>171</sub> | Si(4)...H(30)    | 248.9(4)  | 14.0(fixed)                           | — | -0.8 | 14.0  |
| <i>u</i> <sub>170</sub> | Si(4)...H(20)    | 249.0(4)  | 13.5(fixed)                           | — | -0.9 | 13.5  |
| <i>u</i> <sub>186</sub> | Si(4)...H(25)    | 249.2(4)  | 13.7(fixed)                           | — | -0.9 | 13.7  |
| <i>u</i> <sub>161</sub> | Si(4)...H(21)    | 249.3(4)  | 13.9(fixed)                           | — | -0.6 | 13.9  |
| <i>u</i> <sub>180</sub> | Si(4)...H(24)    | 249.3(4)  | 14.0(fixed)                           | — | -0.7 | 14.0  |
| <i>u</i> <sub>142</sub> | Si(116)...H(140) | 249.5(4)  | 12.9(fixed)                           | — | -0.4 | 12.9  |
| <i>u</i> <sub>160</sub> | Si(115)...H(128) | 249.5(4)  | 13.0(fixed)                           | — | -0.4 | 13.0  |
| <i>u</i> <sub>187</sub> | Si(115)...H(129) | 249.5(4)  | 12.9(fixed)                           | — | -0.4 | 12.9  |
| <i>u</i> <sub>173</sub> | Si(60)...H(85)   | 249.5(4)  | 12.8(fixed)                           | — | -0.4 | 12.8  |
| <i>u</i> <sub>145</sub> | Si(115)...H(130) | 249.5(4)  | 12.9(fixed)                           | — | -0.4 | 12.9  |
| <i>u</i> <sub>182</sub> | Si(116)...H(141) | 249.5(4)  | 12.9(fixed)                           | — | -0.4 | 12.9  |
| <i>u</i> <sub>194</sub> | Si(60)...H(86)   | 249.5(4)  | 12.7(fixed)                           | — | -0.4 | 12.7  |
| <i>u</i> <sub>148</sub> | Si(60)...H(84)   | 249.5(4)  | 12.8(fixed)                           | — | -0.3 | 12.8  |
| <i>u</i> <sub>178</sub> | Si(116)...H(142) | 249.5(4)  | 12.8(fixed)                           | — | -0.3 | 12.8  |
| <i>u</i> <sub>165</sub> | Si(3)...H(10)    | 249.5(4)  | 13.1(fixed)                           | — | -0.4 | 13.1  |
| <i>u</i> <sub>189</sub> | Si(3)...H(8)     | 249.6(4)  | 12.8(fixed)                           | — | -0.4 | 12.8  |
| <i>u</i> <sub>164</sub> | Si(59)...H(72)   | 249.6(4)  | 12.8(fixed)                           | — | -0.4 | 12.8  |
| <i>u</i> <sub>151</sub> | Si(3)...H(9)     | 249.6(4)  | 13.0(fixed)                           | — | -0.3 | 13.0  |
| <i>u</i> <sub>176</sub> | Si(59)...H(64)   | 249.6(4)  | 12.7(fixed)                           | — | -0.4 | 12.7  |
| <i>u</i> <sub>154</sub> | Si(59)...H(74)   | 249.6(4)  | 12.8(fixed)                           | — | -0.4 | 12.8  |
| <i>u</i> <sub>172</sub> | Si(59)...H(73)   | 249.6(4)  | 12.7(fixed)                           | — | -0.4 | 12.7  |
| <i>u</i> <sub>168</sub> | Si(59)...H(66)   | 249.6(4)  | 12.7(fixed)                           | — | -0.4 | 12.7  |
| <i>u</i> <sub>188</sub> | Si(3)...H(13)    | 249.6(4)  | 13.1(fixed)                           | — | -0.4 | 13.1  |
| <i>u</i> <sub>157</sub> | Si(59)...H(65)   | 249.7(4)  | 12.8(fixed)                           | — | -0.3 | 12.8  |
| <i>u</i> <sub>185</sub> | Si(60)...H(81)   | 249.7(4)  | 12.9(fixed)                           | — | -0.4 | 12.9  |
| <i>u</i> <sub>162</sub> | Si(115)...H(126) | 249.7(4)  | 13.1(fixed)                           | — | -0.4 | 13.1  |
| <i>u</i> <sub>163</sub> | Si(60)...H(80)   | 249.7(4)  | 12.8(fixed)                           | — | -0.4 | 12.8  |
| <i>u</i> <sub>179</sub> | Si(3)...H(14)    | 249.7(4)  | 13.0(fixed)                           | — | -0.4 | 13.0  |
| <i>u</i> <sub>169</sub> | Si(3)...H(17)    | 249.7(4)  | 13.0(fixed)                           | — | -0.4 | 13.0  |
| <i>u</i> <sub>159</sub> | Si(60)...H(82)   | 249.7(4)  | 12.8(fixed)                           | — | -0.4 | 12.8  |
| <i>u</i> <sub>153</sub> | Si(115)...H(124) | 249.7(4)  | 13.0(fixed)                           | — | -0.3 | 13.0  |
| <i>u</i> <sub>192</sub> | Si(115)...H(125) | 249.7(4)  | 12.8(fixed)                           | — | -0.4 | 12.8  |
| <i>u</i> <sub>150</sub> | Si(3)...H(12)    | 249.7(4)  | 13.0(fixed)                           | — | -0.3 | 13.0  |
| <i>u</i> <sub>191</sub> | Si(3)...H(16)    | 249.7(4)  | 12.9(fixed)                           | — | -0.3 | 12.9  |
| <i>u</i> <sub>149</sub> | Si(3)...H(18)    | 249.7(4)  | 13.0(fixed)                           | — | -0.3 | 13.0  |
| <i>u</i> <sub>167</sub> | Si(116)...H(133) | 249.7(4)  | 13.1(fixed)                           | — | -0.4 | 13.1  |

|                          |                  |            |                                        |   |       |       |
|--------------------------|------------------|------------|----------------------------------------|---|-------|-------|
| <i>u</i> <sub>196</sub>  | Si(116)...H(132) | 249.7(4)   | 13.0(fixed)                            | — | -0.4  | 13.0  |
| <i>u</i> <sub>174</sub>  | Si(59)...H(70)   | 249.8(4)   | 12.8(fixed)                            | — | -0.4  | 12.8  |
| <i>u</i> <sub>190</sub>  | Si(59)...H(69)   | 249.8(4)   | 12.8(fixed)                            | — | -0.4  | 12.8  |
| <i>u</i> <sub>146</sub>  | Si(60)...H(78)   | 249.8(4)   | 12.8(fixed)                            | — | -0.4  | 12.8  |
| <i>u</i> <sub>175</sub>  | Si(60)...H(77)   | 249.8(4)   | 12.8(fixed)                            | — | -0.4  | 12.8  |
| <i>u</i> <sub>156</sub>  | Si(59)...H(68)   | 249.8(4)   | 12.9(fixed)                            | — | -0.3  | 12.9  |
| <i>u</i> <sub>183</sub>  | Si(60)...H(76)   | 249.8(4)   | 12.8(fixed)                            | — | -0.4  | 12.8  |
| <i>u</i> <sub>193</sub>  | Si(116)...H(137) | 249.8(4)   | 13.1(fixed)                            | — | -0.4  | 13.1  |
| <i>u</i> <sub>143</sub>  | Si(116)...H(134) | 249.8(4)   | 13.0(fixed)                            | — | -0.3  | 13.0  |
| <i>u</i> <sub>184</sub>  | Si(116)...H(136) | 249.8(4)   | 13.2(fixed)                            | — | -0.4  | 13.2  |
| <i>u</i> <sub>195</sub>  | Si(115)...H(122) | 249.9(4)   | 12.9(fixed)                            | — | -0.4  | 12.9  |
| <i>u</i> <sub>177</sub>  | Si(115)...H(120) | 249.9(4)   | 12.9(fixed)                            | — | -0.4  | 12.9  |
| <i>u</i> <sub>144</sub>  | Si(116)...H(138) | 249.9(4)   | 12.9(fixed)                            | — | -0.3  | 12.9  |
| <i>u</i> <sub>155</sub>  | Si(115)...H(121) | 249.9(4)   | 12.9(fixed)                            | — | -0.3  | 12.9  |
| <i>u</i> <sub>158</sub>  | Si(4)...H(22)    | 250.3(4)   | 13.7(fixed)                            | — | 0.4   | 13.7  |
| <i>u</i> <sub>147</sub>  | Si(4)...H(28)    | 250.4(4)   | 14.5(fixed)                            | — | 0.7   | 14.5  |
| <i>u</i> <sub>152</sub>  | Si(4)...H(26)    | 250.5(4)   | 13.9(fixed)                            | — | 0.5   | 13.9  |
| <i>u</i> <sub>200</sub>  | H(13)...H(36)    | 251.7(174) | 82.1(fixed)                            | — | 28.4  | 82.1  |
| <i>u</i> <sub>747</sub>  | H(92)...H(104)   | 257.8(87)  | 77.0(fixed)                            | — | 1.0   | 77.0  |
| <i>u</i> <sub>198</sub>  | H(125)...H(137)  | 259.3(64)  | 63.1(fixed)                            | — | 34.6  | 63.1  |
| <i>u</i> <sub>201</sub>  | H(129)...H(157)  | 260.7(228) | 74.1(fixed)                            | — | 33.7  | 74.1  |
| <i>u</i> <sub>403</sub>  | H(10)...H(53)    | 268.7(123) | 180.0(fixed)                           | — | 46.8  | 180.0 |
| <i>u</i> <sub>377</sub>  | H(54)...H(56)    | 269.9(92)  | 146.4(fixed)                           | — | 20.3  | 146.4 |
| <i>u</i> <sub>297</sub>  | H(66)...H(111)   | 272.5(80)  | 70.1(fixed)                            | — | 13.2  | 70.1  |
| <i>u</i> <sub>380</sub>  | H(122)...C(155)  | 274.8(85)  | 53.7(fixed)                            | — | 22.1  | 53.7  |
| <i>u</i> <sub>1790</sub> | H(72)...H(98)    | 276.9(246) | 53.9(fixed)                            | — | -12.3 | 53.9  |
| <i>u</i> <sub>540</sub>  | H(72)...H(98)    | 280.1(271) | 110.5(fixed)                           | — | 22.1  | 110.5 |
| <i>u</i> <sub>141</sub>  | H(8)...H(36)     | 283.0(162) | 67.8(fixed)                            | — | 38.0  | 67.8  |
| <i>u</i> <sub>364</sub>  | C(67)...H(81)    | 285.6(59)  | 55.9(fixed)                            | — | 18.3  | 55.9  |
| <i>u</i> <sub>360</sub>  | C(119)...H(156)  | 286.7(79)  | 58.0(fixed)                            | — | 34.7  | 58.0  |
| <i>u</i> <sub>560</sub>  | H(122)...H(157)  | 287.2(174) | 70.0(fixed)                            | — | 8.1   | 70.0  |
| <i>u</i> <sub>131</sub>  | H(76)...H(110)   | 288.0(226) | 56.7(fixed)                            | — | 43.5  | 56.7  |
| <i>u</i> <sub>166</sub>  | H(41)...H(49)    | 288.9(85)  | 109.2(fixed)                           | — | 96.3  | 109.2 |
| <i>u</i> <sub>647</sub>  | H(73)...H(98)    | 288.9(320) | 102.9(fixed)                           | — | 10.1  | 102.9 |
| <i>u</i> <sub>197</sub>  | H(142)...H(166)  | 289.5(164) | 70.6(fixed)                            | — | 53.7  | 70.6  |
| <i>u</i> <sub>392</sub>  | H(14)...H(25)    | 289.9(98)  | 125.7(fixed)                           | — | 36.3  | 125.7 |
| <i>u</i> <sub>641</sub>  | H(70)...H(80)    | 290.1(74)  | 82.2(fixed)                            | — | 7.1   | 82.2  |
| <i>u</i> <sub>218</sub>  | H(8)...H(53)     | 297.6(151) | 129.5(fixed)                           | — | 93.2  | 129.5 |
| <i>u</i> <sub>1003</sub> | C(83)...H(110)   | 298.5(241) | 59.2(fixed)                            | — | 11.3  | 59.2  |
| <i>u</i> <sub>1326</sub> | H(73)...H(98)    | 299.2(302) | 65.1(fixed)                            | — | 0.1   | 65.1  |
| <i>u</i> <sub>230</sub>  | C(135)...C(139)  | 299.4(17)  | 12.9(tied to <i>u</i> <sub>237</sub> ) | — | -0.3  | 12.4  |
| <i>u</i> <sub>271</sub>  | H(137)...H(141)  | 299.7(35)  | 42.6(fixed)                            | — | 6.5   | 42.6  |
| <i>u</i> <sub>268</sub>  | H(81)...H(85)    | 299.7(35)  | 42.8(fixed)                            | — | 6.6   | 42.8  |
| <i>u</i> <sub>237</sub>  | C(11)...C(15)    | 300.0(16)  | 12.7(4)                                | — | -0.3  | 12.3  |
| <i>u</i> <sub>228</sub>  | C(123)...C(127)  | 300.0(16)  | 12.4(tied to <i>u</i> <sub>237</sub> ) | — | -0.2  | 11.9  |
| <i>u</i> <sub>234</sub>  | C(23)...C(27)    | 300.1(17)  | 14.1(tied to <i>u</i> <sub>237</sub> ) | — | -0.7  | 13.6  |



|                         |                  |            |                                        |   |      |       |
|-------------------------|------------------|------------|----------------------------------------|---|------|-------|
| <i>u</i> <sub>235</sub> | C(79)...C(83)    | 300.6(17)  | 12.7(tied to <i>u</i> <sub>237</sub> ) | — | -0.3 | 12.3  |
| <i>u</i> <sub>264</sub> | H(25)...H(29)    | 300.8(34)  | 42.0(fixed)                            | — | 6.2  | 42.0  |
| <i>u</i> <sub>231</sub> | C(67)...C(71)    | 302.1(15)  | 12.6(tied to <i>u</i> <sub>237</sub> ) | — | -0.3 | 12.1  |
| <i>u</i> <sub>257</sub> | H(30)...H(34)    | 303.9(196) | 146.2(fixed)                           | — | 68.1 | 146.2 |
| <i>u</i> <sub>232</sub> | H(12)...H(18)    | 304.5(34)  | 40.0(fixed)                            | — | 7.8  | 40.0  |
| <i>u</i> <sub>261</sub> | H(126)...H(128)  | 304.8(33)  | 41.3(fixed)                            | — | 6.4  | 41.3  |
| <i>u</i> <sub>225</sub> | H(68)...H(74)    | 305.2(32)  | 39.7(fixed)                            | — | 7.2  | 39.7  |
| <i>u</i> <sub>210</sub> | H(14)...H(29)    | 305.3(95)  | 136.5(fixed)                           | — | 68.1 | 136.5 |
| <i>u</i> <sub>224</sub> | C(7)...C(15)     | 305.5(4)   | 12.4(tied to <i>u</i> <sub>237</sub> ) | — | -0.3 | 11.9  |
| <i>u</i> <sub>244</sub> | C(19)...C(27)    | 305.8(2)   | 14.1(tied to <i>u</i> <sub>237</sub> ) | — | -0.7 | 13.6  |
| <i>u</i> <sub>238</sub> | C(119)...C(123)  | 305.9(4)   | 12.8(tied to <i>u</i> <sub>237</sub> ) | — | -0.3 | 12.3  |
| <i>u</i> <sub>240</sub> | C(131)...C(139)  | 306.3(2)   | 12.9(tied to <i>u</i> <sub>237</sub> ) | — | -0.3 | 12.4  |
| <i>u</i> <sub>214</sub> | H(124)...H(130)  | 306.5(32)  | 39.1(fixed)                            | — | 7.2  | 39.1  |
| <i>u</i> <sub>255</sub> | Si(60)...H(112)  | 306.6(22)  | 16.9(fixed)                            | — | -0.4 | 16.9  |
| <i>u</i> <sub>243</sub> | C(63)...C(67)    | 306.7(4)   | 12.7(tied to <i>u</i> <sub>237</sub> ) | — | -0.3 | 12.2  |
| <i>u</i> <sub>242</sub> | C(7)...C(11)     | 306.8(4)   | 12.8(tied to <i>u</i> <sub>237</sub> ) | — | -0.3 | 12.3  |
| <i>u</i> <sub>256</sub> | Si(116)...H(168) | 307.2(22)  | 17.4(fixed)                            | — | -0.4 | 17.4  |
| <i>u</i> <sub>246</sub> | C(63)...C(71)    | 307.5(4)   | 12.7(tied to <i>u</i> <sub>237</sub> ) | — | -0.3 | 12.2  |
| <i>u</i> <sub>254</sub> | Si(3)...H(56)    | 307.7(22)  | 17.6(fixed)                            | — | -0.4 | 17.6  |
| <i>u</i> <sub>239</sub> | C(75)...C(83)    | 307.7(2)   | 12.7(tied to <i>u</i> <sub>237</sub> ) | — | -0.3 | 12.2  |
| <i>u</i> <sub>208</sub> | H(64)...H(85)    | 307.9(74)  | 64.9(fixed)                            | — | 23.4 | 64.9  |
| <i>u</i> <sub>275</sub> | H(14)...H(16)    | 308.3(34)  | 42.1(fixed)                            | — | 7.4  | 42.1  |
| <i>u</i> <sub>260</sub> | Si(4)...H(56)    | 308.6(22)  | 17.4(fixed)                            | — | -0.4 | 17.4  |
| <i>u</i> <sub>220</sub> | H(138)...H(140)  | 308.7(31)  | 40.5(fixed)                            | — | 6.7  | 40.5  |
| <i>u</i> <sub>219</sub> | C(131)...C(135)  | 309.3(6)   | 12.8(tied to <i>u</i> <sub>237</sub> ) | — | -0.4 | 12.3  |
| <i>u</i> <sub>248</sub> | C(119)...C(127)  | 309.3(4)   | 12.7(tied to <i>u</i> <sub>237</sub> ) | — | -0.3 | 12.2  |
| <i>u</i> <sub>229</sub> | C(75)...C(79)    | 309.4(6)   | 12.8(tied to <i>u</i> <sub>237</sub> ) | — | -0.3 | 12.3  |
| <i>u</i> <sub>202</sub> | H(73)...H(111)   | 309.7(93)  | 54.3(fixed)                            | — | 23.0 | 54.3  |
| <i>u</i> <sub>226</sub> | H(9)...H(12)     | 309.8(19)  | 41.2(fixed)                            | — | 6.9  | 41.2  |
| <i>u</i> <sub>258</sub> | Si(115)...H(168) | 309.9(22)  | 17.2(fixed)                            | — | -0.3 | 17.2  |
| <i>u</i> <sub>516</sub> | H(120)...C(139)  | 310.1(63)  | 75.0(fixed)                            | — | 9.8  | 75.0  |
| <i>u</i> <sub>233</sub> | C(19)...C(23)    | 310.5(6)   | 13.5(tied to <i>u</i> <sub>237</sub> ) | — | -1.2 | 13.0  |
| <i>u</i> <sub>250</sub> | Si(113)...H(168) | 310.7(16)  | 16.9(fixed)                            | — | -0.3 | 16.9  |
| <i>u</i> <sub>438</sub> | C(119)...H(141)  | 310.9(58)  | 76.9(fixed)                            | — | 16.3 | 76.9  |
| <i>u</i> <sub>263</sub> | Si(59)...H(112)  | 310.9(22)  | 17.5(fixed)                            | — | -0.5 | 17.5  |
| <i>u</i> <sub>213</sub> | H(134)...H(138)  | 311.2(19)  | 40.7(fixed)                            | — | 8.3  | 40.7  |
| <i>u</i> <sub>278</sub> | H(129)...H(167)  | 312.0(95)  | 52.7(fixed)                            | — | 11.4 | 52.7  |
| <i>u</i> <sub>252</sub> | H(26)...H(28)    | 312.2(30)  | 41.6(fixed)                            | — | 7.4  | 41.6  |
| <i>u</i> <sub>270</sub> | H(70)...H(72)    | 312.6(33)  | 41.2(fixed)                            | — | 6.6  | 41.2  |
| <i>u</i> <sub>267</sub> | Si(1)...H(56)    | 312.8(16)  | 16.3(fixed)                            | — | -0.3 | 16.3  |
| <i>u</i> <sub>262</sub> | Si(57)...H(112)  | 312.9(16)  | 16.1(fixed)                            | — | -0.3 | 16.1  |
| <i>u</i> <sub>236</sub> | H(121)...H(130)  | 313.5(22)  | 38.3(fixed)                            | — | 6.4  | 38.3  |
| <i>u</i> <sub>247</sub> | H(82)...H(84)    | 313.6(31)  | 40.3(fixed)                            | — | 6.9  | 40.3  |
| <i>u</i> <sub>251</sub> | H(121)...H(124)  | 313.6(19)  | 39.0(fixed)                            | — | 6.1  | 39.0  |
| <i>u</i> <sub>215</sub> | H(78)...H(82)    | 313.7(20)  | 39.3(fixed)                            | — | 6.0  | 39.3  |
| <i>u</i> <sub>216</sub> | H(9)...H(18)     | 313.8(22)  | 39.8(fixed)                            | — | 7.6  | 39.8  |

|           |                 |            |              |   |       |       |
|-----------|-----------------|------------|--------------|---|-------|-------|
| $u_{319}$ | C(79)...H(85)   | 314.4(24)  | 28.4(fixed)  | — | 0.7   | 28.4  |
| $u_{241}$ | H(22)...H(28)   | 314.5(18)  | 41.3(fixed)  | — | 6.8   | 41.3  |
| $u_{269}$ | H(120)...H(125) | 314.7(21)  | 40.5(fixed)  | — | 5.9   | 40.5  |
| $u_{227}$ | H(78)...H(84)   | 314.9(18)  | 36.9(fixed)  | — | 6.7   | 36.9  |
| $u_{312}$ | H(25)...C(27)   | 315.0(24)  | 28.1(fixed)  | — | 0.1   | 28.1  |
| $u_{280}$ | H(20)...H(30)   | 315.4(18)  | 42.0(fixed)  | — | 5.3   | 42.0  |
| $u_{245}$ | H(134)...H(140) | 315.4(18)  | 40.0(fixed)  | — | 7.2   | 40.0  |
| $u_{253}$ | H(65)...H(68)   | 315.6(19)  | 38.6(fixed)  | — | 6.6   | 38.6  |
| $u_{318}$ | H(137)...C(139) | 315.8(24)  | 28.3(fixed)  | — | 0.8   | 28.3  |
| $u_{223}$ | H(70)...H(81)   | 315.9(88)  | 76.4(fixed)  | — | 23.1  | 76.4  |
| $u_{259}$ | H(10)...H(17)   | 316.1(25)  | 41.5(fixed)  | — | 7.0   | 41.5  |
| $u_{249}$ | H(65)...H(74)   | 316.1(23)  | 38.6(fixed)  | — | 6.4   | 38.6  |
| $u_{217}$ | H(22)...H(26)   | 316.4(20)  | 38.2(fixed)  | — | 5.9   | 38.2  |
| $u_{273}$ | H(132)...H(142) | 316.8(19)  | 41.6(fixed)  | — | 7.2   | 41.6  |
| $u_{274}$ | H(64)...H(69)   | 317.1(21)  | 39.6(fixed)  | — | 6.3   | 39.6  |
| $u_{301}$ | H(12)...C(15)   | 317.6(21)  | 26.6(fixed)  | — | 1.0   | 26.6  |
| $u_{361}$ | C(135)...H(141) | 318.3(24)  | 28.3(fixed)  | — | 0.3   | 28.3  |
| $u_{199}$ | H(10)...H(54)   | 318.7(154) | 149.5(fixed) | — | 135.5 | 149.5 |
| $u_{277}$ | H(66)...H(73)   | 318.8(24)  | 39.4(fixed)  | — | 5.8   | 39.4  |
| $u_{340}$ | C(123)...H(128) | 318.8(25)  | 27.8(fixed)  | — | 0.4   | 27.8  |
| $u_{338}$ | C(11)...H(16)   | 319.3(25)  | 28.8(fixed)  | — | 1.0   | 28.8  |
| $u_{299}$ | H(68)...C(71)   | 319.4(20)  | 27.4(fixed)  | — | 0.8   | 27.4  |
| $u_{302}$ | H(124)...C(127) | 319.5(20)  | 27.0(fixed)  | — | 0.7   | 27.0  |
| $u_{294}$ | C(135)...H(140) | 319.5(23)  | 27.1(fixed)  | — | 0.6   | 27.1  |
| $u_{846}$ | C(67)...H(80)   | 319.7(68)  | 64.0(fixed)  | — | -1.1  | 64.0  |
| $u_{296}$ | H(8)...H(37)    | 319.8(80)  | 95.8(fixed)  | — | 28.2  | 95.8  |
| $u_{356}$ | C(23)...H(29)   | 320.2(23)  | 29.7(fixed)  | — | 0.2   | 29.7  |
| $u_{320}$ | H(126)...C(127) | 320.3(22)  | 28.1(fixed)  | — | 0.6   | 28.1  |
| $u_{355}$ | H(81)...C(83)   | 320.4(24)  | 28.8(fixed)  | — | 0.4   | 28.8  |
| $u_{333}$ | C(11)...H(18)   | 320.6(25)  | 28.0(fixed)  | — | 0.8   | 28.0  |
| $u_{303}$ | C(23)...H(28)   | 320.7(22)  | 28.3(fixed)  | — | 1.4   | 28.3  |
| $u_{306}$ | H(82)...C(83)   | 320.8(22)  | 26.3(fixed)  | — | 0.9   | 26.3  |
| $u_{295}$ | C(123)...H(130) | 321.0(25)  | 26.3(fixed)  | — | 1.0   | 26.3  |
| $u_{314}$ | C(67)...H(74)   | 321.9(24)  | 26.4(fixed)  | — | 0.7   | 26.4  |
| $u_{283}$ | H(76)...H(86)   | 321.9(19)  | 41.0(fixed)  | — | 5.7   | 41.0  |
| $u_{300}$ | H(9)...C(11)    | 322.4(11)  | 27.2(fixed)  | — | 0.9   | 27.2  |
| $u_{359}$ | H(14)...C(15)   | 322.4(23)  | 28.3(fixed)  | — | 0.4   | 28.3  |
| $u_{323}$ | H(138)...C(139) | 322.6(21)  | 27.5(fixed)  | — | 0.6   | 27.5  |
| $u_{332}$ | C(67)...H(72)   | 322.9(24)  | 27.4(fixed)  | — | 0.6   | 27.4  |
| $u_{286}$ | H(8)...H(13)    | 323.1(22)  | 40.5(fixed)  | — | 6.1   | 40.5  |
| $u_{298}$ | C(75)...H(84)   | 323.5(10)  | 26.2(fixed)  | — | 1.2   | 26.2  |
| $u_{291}$ | C(7)...H(18)    | 323.8(15)  | 27.9(fixed)  | — | 1.2   | 27.9  |
| $u_{305}$ | H(10)...C(15)   | 324.8(12)  | 27.5(fixed)  | — | 0.7   | 27.5  |
| $u_{348}$ | H(70)...C(71)   | 325.2(21)  | 28.2(fixed)  | — | 0.4   | 28.2  |
| $u_{313}$ | H(65)...C(67)   | 325.6(11)  | 26.1(fixed)  | — | 0.6   | 26.1  |
| $u_{272}$ | H(77)...H(80)   | 325.8(23)  | 41.4(fixed)  | — | 5.2   | 41.4  |

|           |                 |            |             |   |      |      |
|-----------|-----------------|------------|-------------|---|------|------|
| $u_{316}$ | C(131)...H(140) | 325.9(10)  | 26.5(fixed) | — | 0.6  | 26.5 |
| $u_{292}$ | H(78)...C(79)   | 326.2(11)  | 26.0(fixed) | — | 0.4  | 26.0 |
| $u_{343}$ | C(19)...H(30)   | 326.2(10)  | 29.8(fixed) | — | 0.3  | 29.8 |
| $u_{344}$ | C(43)...H(54)   | 326.4(10)  | 29.0(fixed) | — | 0.3  | 29.0 |
| $u_{345}$ | C(63)...H(69)   | 326.4(11)  | 27.6(fixed) | — | 0.7  | 27.6 |
| $u_{287}$ | C(131)...H(138) | 326.5(11)  | 27.2(fixed) | — | 1.0  | 27.2 |
| $u_{309}$ | C(119)...H(124) | 326.5(10)  | 26.7(fixed) | — | 0.9  | 26.7 |
| $u_{308}$ | H(22)...C(27)   | 326.6(9)   | 27.4(fixed) | — | 1.3  | 27.4 |
| $u_{288}$ | H(122)...H(129) | 326.6(25)  | 40.6(fixed) | — | 5.5  | 40.6 |
| $u_{336}$ | H(121)...C(123) | 326.7(12)  | 26.4(fixed) | — | 0.2  | 26.4 |
| $u_{285}$ | H(41)...C(47)   | 326.8(53)  | 74.8(fixed) | — | 54.2 | 74.8 |
| $u_{330}$ | C(79)...H(84)   | 326.8(22)  | 28.0(fixed) | — | 0.5  | 28.0 |
| $u_{351}$ | H(132)...C(139) | 326.8(9)   | 28.4(fixed) | — | 0.8  | 28.4 |
| $u_{335}$ | H(76)...C(83)   | 326.8(9)   | 26.3(fixed) | — | 0.4  | 26.3 |
| $u_{520}$ | H(77)...H(112)  | 326.8(38)  | 41.2(fixed) | — | 2.9  | 41.2 |
| $u_{290}$ | H(134)...C(135) | 326.8(11)  | 28.0(fixed) | — | 1.0  | 28.0 |
| $u_{321}$ | H(120)...C(123) | 327.0(12)  | 26.7(fixed) | — | 0.5  | 26.7 |
| $u_{409}$ | H(136)...H(168) | 327.2(41)  | 52.7(fixed) | — | 6.8  | 52.7 |
| $u_{353}$ | C(119)...H(125) | 327.4(11)  | 28.1(fixed) | — | 0.5  | 28.1 |
| $u_{564}$ | H(76)...H(109)  | 327.6(89)  | 58.2(fixed) | — | 13.1 | 58.2 |
| $u_{324}$ | C(7)...H(12)    | 327.6(10)  | 28.1(fixed) | — | 0.5  | 28.1 |
| $u_{304}$ | H(121)...C(127) | 328.1(11)  | 25.2(fixed) | — | 0.8  | 25.2 |
| $u_{317}$ | C(63)...H(74)   | 328.1(15)  | 26.9(fixed) | — | 0.7  | 26.9 |
| $u_{311}$ | H(9)...C(15)    | 328.1(11)  | 26.6(fixed) | — | 0.5  | 26.6 |
| $u_{339}$ | C(119)...H(130) | 328.2(15)  | 27.2(fixed) | — | 0.5  | 27.2 |
| $u_{293}$ | C(19)...H(26)   | 328.2(11)  | 26.8(fixed) | — | 0.8  | 26.8 |
| $u_{349}$ | C(7)...H(13)    | 328.3(11)  | 27.9(fixed) | — | 0.6  | 27.9 |
| $u_{329}$ | C(19)...H(28)   | 328.3(10)  | 29.0(fixed) | — | 0.9  | 29.0 |
| $u_{362}$ | H(20)...C(27)   | 328.5(9)   | 27.8(fixed) | — | -0.4 | 27.8 |
| $u_{315}$ | H(134)...C(139) | 328.5(9)   | 28.5(fixed) | — | 0.8  | 28.5 |
| $u_{378}$ | H(122)...H(141) | 328.5(72)  | 85.4(fixed) | — | 19.7 | 85.4 |
| $u_{331}$ | H(65)...C(71)   | 328.7(11)  | 26.1(fixed) | — | 0.5  | 26.1 |
| $u_{342}$ | C(131)...H(142) | 329.1(11)  | 27.9(fixed) | — | 0.5  | 27.9 |
| $u_{346}$ | C(7)...H(17)    | 329.4(17)  | 28.8(fixed) | — | 0.5  | 28.8 |
| $u_{347}$ | H(66)...C(71)   | 329.4(12)  | 26.7(fixed) | — | 0.4  | 26.7 |
| $u_{337}$ | C(63)...H(68)   | 329.7(10)  | 27.0(fixed) | — | 0.7  | 27.0 |
| $u_{279}$ | H(21)...H(24)   | 329.8(23)  | 41.2(fixed) | — | 4.9  | 41.2 |
| $u_{358}$ | C(63)...H(73)   | 330.0(16)  | 27.2(fixed) | — | 0.4  | 27.2 |
| $u_{357}$ | H(64)...C(67)   | 330.3(13)  | 26.7(fixed) | — | 0.3  | 26.7 |
| $u_{307}$ | C(75)...H(82)   | 330.6(11)  | 27.2(fixed) | — | 0.7  | 27.2 |
| $u_{276}$ | H(133)...H(136) | 330.9(23)  | 43.0(fixed) | — | 6.5  | 43.0 |
| $u_{203}$ | H(129)...H(156) | 331.4(275) | 78.8(fixed) | — | 26.3 | 78.8 |
| $u_{326}$ | C(75)...H(80)   | 331.8(13)  | 28.9(fixed) | — | 0.5  | 28.9 |
| $u_{334}$ | H(78)...C(83)   | 331.9(9)   | 24.9(fixed) | — | 0.4  | 24.9 |
| $u_{322}$ | H(22)...C(23)   | 332.6(11)  | 26.5(fixed) | — | 0.3  | 26.5 |
| $u_{514}$ | H(121)...H(156) | 333.2(110) | 72.5(fixed) | — | 34.0 | 72.5 |

|                          |                  |            |                                        |          |      |       |
|--------------------------|------------------|------------|----------------------------------------|----------|------|-------|
| <i>u</i> <sub>327</sub>  | H(21)...C(23)    | 333.6(13)  | 27.9(fixed)                            | —        | -0.4 | 27.9  |
| <i>u</i> <sub>205</sub>  | H(20)...H(55)    | 333.6(70)  | 86.9(fixed)                            | —        | 54.1 | 86.9  |
| <i>u</i> <sub>367</sub>  | H(8)...C(11)     | 334.1(13)  | 27.3(fixed)                            | —        | 0.2  | 27.3  |
| <i>u</i> <sub>788</sub>  | H(120)...H(142)  | 334.1(88)  | 81.3(fixed)                            | —        | 1.0  | 81.3  |
| <i>u</i> <sub>352</sub>  | C(119)...H(129)  | 334.1(16)  | 27.4(fixed)                            | —        | 0.6  | 27.4  |
| <i>u</i> <sub>370</sub>  | H(122)...C(127)  | 334.5(12)  | 27.2(fixed)                            | —        | 0.0  | 27.2  |
| <i>u</i> <sub>569</sub>  | H(122)...H(158)  | 335.1(80)  | 64.7(fixed)                            | —        | 19.1 | 64.7  |
| <i>u</i> <sub>341</sub>  | H(17)...H(56)    | 335.3(35)  | 45.2(fixed)                            | —        | 9.0  | 45.2  |
| <i>u</i> <sub>365</sub>  | C(75)...H(86)    | 335.5(11)  | 28.7(fixed)                            | —        | 0.3  | 28.7  |
| <i>u</i> <sub>786</sub>  | C(71)...H(98)    | 335.7(275) | 94.1(fixed)                            | —        | 10.3 | 94.1  |
| <i>u</i> <sub>328</sub>  | H(133)...C(135)  | 335.7(13)  | 29.2(fixed)                            | —        | 0.5  | 29.2  |
| <i>u</i> <sub>350</sub>  | C(131)...H(136)  | 336.1(13)  | 28.6(fixed)                            | —        | 0.2  | 28.6  |
| <i>u</i> <sub>405</sub>  | H(82)...H(85)    | 336.2(29)  | 43.6(fixed)                            | —        | -0.9 | 43.6  |
| <i>u</i> <sub>354</sub>  | H(77)...C(79)    | 336.3(13)  | 26.6(fixed)                            | —        | 0.0  | 26.6  |
| <i>u</i> <sub>1480</sub> | C(71)...H(98)    | 336.7(262) | 54.3(fixed)                            | —        | -5.6 | 54.3  |
| <i>u</i> <sub>397</sub>  | H(25)...H(28)    | 337.5(31)  | 45.6(fixed)                            | —        | -0.2 | 45.6  |
| <i>u</i> <sub>368</sub>  | H(21)...H(56)    | 337.7(37)  | 59.8(fixed)                            | —        | 20.1 | 59.8  |
| <i>u</i> <sub>363</sub>  | C(19)...H(24)    | 338.6(13)  | 28.5(fixed)                            | —        | -0.6 | 28.5  |
| <i>u</i> <sub>374</sub>  | H(167)...H(168)  | 339.1(46)  | 29.2(fixed)                            | —        | 0.4  | 29.2  |
| <i>u</i> <sub>404</sub>  | H(12)...H(16)    | 339.2(33)  | 46.2(fixed)                            | —        | -0.8 | 46.2  |
| <i>u</i> <sub>390</sub>  | H(137)...H(140)  | 339.3(31)  | 44.2(fixed)                            | —        | -1.0 | 44.2  |
| <i>u</i> <sub>1108</sub> | H(84)...H(110)   | 341.2(229) | 69.4(fixed)                            | —        | 11.8 | 69.4  |
| <i>u</i> <sub>966</sub>  | H(90)...H(105)   | 341.3(89)  | 70.1(fixed)                            | —        | 5.1  | 70.1  |
| <i>u</i> <sub>289</sub>  | H(129)...C(155)  | 341.7(231) | 56.9(fixed)                            | —        | 24.1 | 56.9  |
| <i>u</i> <sub>433</sub>  | H(124)...H(128)  | 342.1(32)  | 44.2(fixed)                            | —        | -1.7 | 44.2  |
| <i>u</i> <sub>398</sub>  | H(76)...H(84)    | 342.7(17)  | 42.5(fixed)                            | —        | -0.7 | 42.5  |
| <i>u</i> <sub>620</sub>  | H(120)...H(156)  | 342.8(98)  | 59.7(fixed)                            | —        | 24.9 | 59.7  |
| <i>u</i> <sub>386</sub>  | C(123)...H(137)  | 343.2(56)  | 52.8(fixed)                            | —        | 17.5 | 52.8  |
| <i>u</i> <sub>310</sub>  | H(126)...H(168)  | 343.2(32)  | 44.5(fixed)                            | —        | 8.2  | 44.5  |
| <i>u</i> <sub>411</sub>  | H(68)...H(72)    | 343.3(32)  | 45.0(fixed)                            | —        | -1.2 | 45.0  |
| <i>u</i> <sub>631</sub>  | H(72)...H(97)    | 344.2(189) | 121.7(fixed)                           | —        | 17.3 | 121.7 |
| <i>u</i> <sub>434</sub>  | C(11)...H(36)    | 344.4(131) | 73.8(fixed)                            | —        | 18.8 | 73.8  |
| <i>u</i> <sub>387</sub>  | H(10)...H(18)    | 344.5(26)  | 46.2(fixed)                            | —        | -0.8 | 46.2  |
| <i>u</i> <sub>517</sub>  | C(7)...H(53)     | 344.9(114) | 135.4(fixed)                           | —        | 55.1 | 135.4 |
| <i>u</i> <sub>389</sub>  | Si(1)...C(39)    | 345.1(10)  | 16.2(tied to <i>u</i> <sub>388</sub> ) | —        | -0.3 | 14.6  |
| <i>u</i> <sub>414</sub>  | H(9)...H(13)     | 345.4(18)  | 44.1(fixed)                            | —        | -1.0 | 44.1  |
| <i>u</i> <sub>402</sub>  | Si(57)...C(87)   | 345.7(8)   | 15.7(tied to <i>u</i> <sub>388</sub> ) | —        | -0.2 | 14.1  |
| <i>u</i> <sub>393</sub>  | Si(113)...C(159) | 346.0(12)  | 16.4(tied to <i>u</i> <sub>388</sub> ) | —        | -0.3 | 14.7  |
| <i>u</i> <sub>266</sub>  | H(125)...C(135)  | 346.0(60)  | 47.7(fixed)                            | —        | 25.2 | 47.7  |
| <i>u</i> <sub>634</sub>  | C(67)...C(79)    | 346.3(47)  | 45.6(fixed)                            | —        | 4.2  | 45.6  |
| <i>u</i> <sub>401</sub>  | H(126)...H(130)  | 346.3(33)  | 44.1(fixed)                            | —        | -1.1 | 44.1  |
| <i>u</i> <sub>512</sub>  | C(39)...H(48)    | 346.4(62)  | 97.2(fixed)                            | —        | 35.7 | 97.2  |
| <i>u</i> <sub>388</sub>  | Si(1)...C(43)    | 346.7(10)  | 16.5(4)                                | 14.9(15) | 0.6  | 14.9  |
| <i>u</i> <sub>394</sub>  | Si(57)...C(95)   | 347.2(10)  | 15.7(tied to <i>u</i> <sub>388</sub> ) | —        | -0.3 | 14.1  |
| <i>u</i> <sub>456</sub>  | H(138)...H(141)  | 347.5(28)  | 43.6(fixed)                            | —        | -1.9 | 43.6  |
| <i>u</i> <sub>419</sub>  | Si(113)...C(143) | 347.6(8)   | 15.6(tied to <i>u</i> <sub>388</sub> ) | —        | -0.3 | 14.0  |

|                         |                  |            |                                        |   |      |       |
|-------------------------|------------------|------------|----------------------------------------|---|------|-------|
| <i>u</i> <sub>325</sub> | H(8)...C(35)     | 348.1(116) | 67.7(fixed)                            | — | 25.9 | 67.7  |
| <i>u</i> <sub>455</sub> | H(14)...H(18)    | 348.3(34)  | 45.9(fixed)                            | — | -2.0 | 45.9  |
| <i>u</i> <sub>529</sub> | C(127)...H(157)  | 348.5(181) | 70.4(fixed)                            | — | 18.5 | 70.4  |
| <i>u</i> <sub>629</sub> | Si(59)...H(81)   | 348.6(35)  | 44.8(fixed)                            | — | 6.2  | 44.8  |
| <i>u</i> <sub>551</sub> | H(70)...C(79)    | 349.1(66)  | 66.5(fixed)                            | — | 7.8  | 66.5  |
| <i>u</i> <sub>436</sub> | H(132)...H(140)  | 349.1(16)  | 44.9(fixed)                            | — | -1.4 | 44.9  |
| <i>u</i> <sub>739</sub> | H(69)...H(82)    | 349.3(55)  | 67.9(fixed)                            | — | 9.0  | 67.9  |
| <i>u</i> <sub>408</sub> | Si(113)...C(151) | 349.3(10)  | 15.3(tied to <i>u</i> <sub>388</sub> ) | — | -0.2 | 13.8  |
| <i>u</i> <sub>421</sub> | Si(57)...C(107)  | 349.4(8)   | 15.0(tied to <i>u</i> <sub>388</sub> ) | — | -0.3 | 13.5  |
| <i>u</i> <sub>422</sub> | Si(58)...C(83)   | 349.4(8)   | 15.0(tied to <i>u</i> <sub>388</sub> ) | — | -0.3 | 13.5  |
| <i>u</i> <sub>417</sub> | Si(1)...C(51)    | 349.9(8)   | 16.3(tied to <i>u</i> <sub>388</sub> ) | — | 0.9  | 14.7  |
| <i>u</i> <sub>207</sub> | H(125)...H(136)  | 350.1(86)  | 76.4(fixed)                            | — | 28.9 | 76.4  |
| <i>u</i> <sub>547</sub> | C(63)...H(111)   | 350.2(61)  | 57.1(fixed)                            | — | 3.8  | 57.1  |
| <i>u</i> <sub>440</sub> | H(70)...H(74)    | 350.4(33)  | 44.0(fixed)                            | — | -1.6 | 44.0  |
| <i>u</i> <sub>418</sub> | H(22)...H(30)    | 350.7(17)  | 44.9(fixed)                            | — | -0.1 | 44.9  |
| <i>u</i> <sub>399</sub> | H(78)...H(80)    | 351.1(18)  | 43.2(fixed)                            | — | -1.3 | 43.2  |
| <i>u</i> <sub>410</sub> | Si(113)...C(155) | 352.1(10)  | 16.5(tied to <i>u</i> <sub>388</sub> ) | — | -0.2 | 14.8  |
| <i>u</i> <sub>412</sub> | Si(1)...C(47)    | 352.1(12)  | 17.9(tied to <i>u</i> <sub>388</sub> ) | — | 0.5  | 16.1  |
| <i>u</i> <sub>413</sub> | H(120)...H(124)  | 352.2(18)  | 42.2(fixed)                            | — | -0.8 | 42.2  |
| <i>u</i> <sub>391</sub> | Si(113)...C(147) | 352.9(11)  | 16.0(tied to <i>u</i> <sub>388</sub> ) | — | -0.3 | 14.4  |
| <i>u</i> <sub>395</sub> | H(21)...H(26)    | 352.9(18)  | 44.3(fixed)                            | — | -1.1 | 44.3  |
| <i>u</i> <sub>406</sub> | Si(1)...C(31)    | 353.0(8)   | 17.8(tied to <i>u</i> <sub>388</sub> ) | — | -0.5 | 16.0  |
| <i>u</i> <sub>450</sub> | H(121)...H(125)  | 353.2(18)  | 42.9(fixed)                            | — | -1.8 | 42.9  |
| <i>u</i> <sub>461</sub> | H(26)...H(29)    | 353.3(26)  | 45.8(fixed)                            | — | -1.0 | 45.8  |
| <i>u</i> <sub>423</sub> | Si(1)...C(35)    | 353.4(11)  | 16.4(tied to <i>u</i> <sub>388</sub> ) | — | -0.3 | 14.7  |
| <i>u</i> <sub>453</sub> | H(81)...H(84)    | 353.7(29)  | 45.0(fixed)                            | — | -1.9 | 45.0  |
| <i>u</i> <sub>430</sub> | Si(113)...C(163) | 353.7(8)   | 15.8(tied to <i>u</i> <sub>388</sub> ) | — | -0.2 | 14.2  |
| <i>u</i> <sub>428</sub> | H(66)...H(74)    | 354.3(25)  | 42.9(fixed)                            | — | -1.2 | 42.9  |
| <i>u</i> <sub>371</sub> | C(75)...H(110)   | 354.3(154) | 52.1(fixed)                            | — | 26.1 | 52.1  |
| <i>u</i> <sub>407</sub> | Si(57)...C(91)   | 354.7(11)  | 16.2(tied to <i>u</i> <sub>388</sub> ) | — | -0.3 | 14.6  |
| <i>u</i> <sub>817</sub> | Si(60)...H(110)  | 354.7(90)  | 42.2(fixed)                            | — | 14.2 | 42.2  |
| <i>u</i> <sub>373</sub> | C(83)...H(100)   | 355.0(150) | 47.4(fixed)                            | — | 22.2 | 47.4  |
| <i>u</i> <sub>372</sub> | H(76)...C(107)   | 355.0(150) | 47.4(fixed)                            | — | 22.2 | 47.4  |
| <i>u</i> <sub>437</sub> | Si(57)...H(105)  | 355.0(18)  | 30.9(fixed)                            | — | 1.1  | 30.9  |
| <i>u</i> <sub>366</sub> | H(133)...H(168)  | 355.9(42)  | 51.4(fixed)                            | — | 9.5  | 51.4  |
| <i>u</i> <sub>431</sub> | H(134)...H(142)  | 356.0(16)  | 46.8(fixed)                            | — | -1.6 | 46.8  |
| <i>u</i> <sub>396</sub> | H(133)...H(138)  | 356.0(18)  | 46.3(fixed)                            | — | -1.4 | 46.3  |
| <i>u</i> <sub>444</sub> | H(65)...H(73)    | 356.1(25)  | 42.2(fixed)                            | — | -1.5 | 42.2  |
| <i>u</i> <sub>446</sub> | Si(113)...H(160) | 356.6(18)  | 30.8(fixed)                            | — | 1.5  | 30.8  |
| <i>u</i> <sub>454</sub> | H(20)...H(28)    | 356.7(16)  | 44.3(fixed)                            | — | -1.4 | 44.3  |
| <i>u</i> <sub>465</sub> | C(19)...H(56)    | 357.2(34)  | 46.4(fixed)                            | — | 6.1  | 46.4  |
| <i>u</i> <sub>416</sub> | H(121)...H(129)  | 357.3(25)  | 42.1(fixed)                            | — | -0.8 | 42.1  |
| <i>u</i> <sub>424</sub> | H(134)...H(136)  | 357.4(17)  | 45.7(fixed)                            | — | -1.8 | 45.7  |
| <i>u</i> <sub>617</sub> | C(51)...H(56)    | 357.4(69)  | 112.9(fixed)                           | — | -0.5 | 112.9 |
| <i>u</i> <sub>427</sub> | H(10)...H(56)    | 357.7(38)  | 54.9(fixed)                            | — | 5.1  | 54.9  |
| <i>u</i> <sub>447</sub> | H(9)...H(17)     | 358.0(25)  | 44.8(fixed)                            | — | -2.2 | 44.8  |

|                         |                  |            |                                        |   |      |       |
|-------------------------|------------------|------------|----------------------------------------|---|------|-------|
| <i>u</i> <sub>469</sub> | H(122)...H(130)  | 358.1(25)  | 42.8(fixed)                            | — | -2.0 | 42.8  |
| <i>u</i> <sub>442</sub> | Si(1)...H(42)    | 358.7(21)  | 30.9(fixed)                            | — | 1.7  | 30.9  |
| <i>u</i> <sub>441</sub> | Si(57)...H(104)  | 359.3(18)  | 29.0(fixed)                            | — | 1.1  | 29.0  |
| <i>u</i> <sub>479</sub> | Si(57)...H(89)   | 359.6(15)  | 28.3(fixed)                            | — | 0.8  | 28.3  |
| <i>u</i> <sub>612</sub> | C(75)...H(112)   | 359.7(35)  | 28.5(fixed)                            | — | -1.2 | 28.5  |
| <i>u</i> <sub>451</sub> | H(64)...H(68)    | 359.7(18)  | 42.8(fixed)                            | — | -1.5 | 42.8  |
| <i>u</i> <sub>452</sub> | Si(1)...H(44)    | 359.7(16)  | 29.3(fixed)                            | — | 2.1  | 29.3  |
| <i>u</i> <sub>473</sub> | Si(59)...H(111)  | 360.0(23)  | 31.6(fixed)                            | — | 3.7  | 31.6  |
| <i>u</i> <sub>491</sub> | Si(113)...H(145) | 360.2(15)  | 28.6(fixed)                            | — | 0.8  | 28.6  |
| <i>u</i> <sub>532</sub> | C(135)...H(168)  | 360.3(35)  | 36.5(fixed)                            | — | -0.5 | 36.5  |
| <i>u</i> <sub>478</sub> | Si(1)...H(41)    | 360.5(21)  | 31.9(fixed)                            | — | 0.9  | 31.9  |
| <i>u</i> <sub>462</sub> | Si(57)...H(98)   | 360.8(20)  | 27.9(fixed)                            | — | 1.1  | 27.9  |
| <i>u</i> <sub>536</sub> | H(44)...H(55)    | 360.8(44)  | 73.4(fixed)                            | — | 1.5  | 73.4  |
| <i>u</i> <sub>426</sub> | Si(57)...H(98)   | 361.0(20)  | 13.8(fixed)                            | — | -0.3 | 13.8  |
| <i>u</i> <sub>482</sub> | Si(57)...H(90)   | 361.1(15)  | 28.0(fixed)                            | — | 0.8  | 28.0  |
| <i>u</i> <sub>500</sub> | Si(57)...H(110)  | 361.5(13)  | 30.2(fixed)                            | — | 0.8  | 30.2  |
| <i>u</i> <sub>458</sub> | H(8)...H(12)     | 361.8(17)  | 44.0(fixed)                            | — | -1.9 | 44.0  |
| <i>u</i> <sub>708</sub> | H(94)...H(105)   | 361.9(56)  | 63.5(fixed)                            | — | 10.8 | 63.5  |
| <i>u</i> <sub>376</sub> | C(7)...H(36)     | 361.9(120) | 58.3(fixed)                            | — | 24.5 | 58.3  |
| <i>u</i> <sub>375</sub> | H(128)...H(167)  | 362.7(69)  | 63.8(fixed)                            | — | 7.8  | 63.8  |
| <i>u</i> <sub>498</sub> | Si(113)...H(154) | 362.8(20)  | 27.4(fixed)                            | — | 0.8  | 27.4  |
| <i>u</i> <sub>400</sub> | H(122)...H(166)  | 363.1(252) | 124.4(fixed)                           | — | 21.9 | 124.4 |
| <i>u</i> <sub>472</sub> | Si(113)...H(157) | 363.3(15)  | 32.2(fixed)                            | — | 1.6  | 32.2  |
| <i>u</i> <sub>464</sub> | Si(1)...H(48)    | 363.4(17)  | 33.3(fixed)                            | — | 2.7  | 33.3  |
| <i>u</i> <sub>457</sub> | Si(1)...H(45)    | 363.4(15)  | 30.6(fixed)                            | — | 2.1  | 30.6  |
| <i>u</i> <sub>463</sub> | C(15)...H(56)    | 363.5(28)  | 30.7(fixed)                            | — | 0.7  | 30.7  |
| <i>u</i> <sub>468</sub> | Si(57)...H(97)   | 363.8(21)  | 30.3(fixed)                            | — | 0.8  | 30.3  |
| <i>u</i> <sub>486</sub> | H(42)...H(48)    | 363.9(76)  | 98.3(fixed)                            | — | 50.3 | 98.3  |
| <i>u</i> <sub>489</sub> | Si(113)...H(161) | 364.2(17)  | 30.2(fixed)                            | — | 0.8  | 30.2  |
| <i>u</i> <sub>443</sub> | H(77)...H(82)    | 364.4(17)  | 41.2(fixed)                            | — | -1.6 | 41.2  |
| <i>u</i> <sub>753</sub> | C(119)...C(155)  | 364.7(70)  | 62.7(tied to <i>u</i> <sub>897</sub> ) | — | 11.9 | 46.9  |
| <i>u</i> <sub>476</sub> | H(128)...H(168)  | 364.8(38)  | 47.9(fixed)                            | — | 5.2  | 47.9  |
| <i>u</i> <sub>812</sub> | C(71)...H(97)    | 364.8(217) | 105.0(fixed)                           | — | 11.7 | 105.0 |
| <i>u</i> <sub>493</sub> | Si(1)...H(53)    | 364.9(13)  | 31.5(fixed)                            | — | 2.1  | 31.5  |
| <i>u</i> <sub>499</sub> | Si(113)...H(146) | 365.1(14)  | 27.3(fixed)                            | — | 0.5  | 27.3  |
| <i>u</i> <sub>481</sub> | Si(57)...H(101)  | 365.2(15)  | 25.7(fixed)                            | — | 1.0  | 25.7  |
| <i>u</i> <sub>435</sub> | H(70)...H(112)   | 365.2(31)  | 48.9(fixed)                            | — | 6.0  | 48.9  |
| <i>u</i> <sub>490</sub> | Si(1)...H(37)    | 365.3(17)  | 31.5(fixed)                            | — | 1.0  | 31.5  |
| <i>u</i> <sub>211</sub> | H(120)...H(137)  | 365.4(95)  | 83.5(fixed)                            | — | 26.1 | 83.5  |
| <i>u</i> <sub>492</sub> | Si(1)...H(54)    | 365.9(13)  | 28.8(fixed)                            | — | 2.5  | 28.8  |
| <i>u</i> <sub>622</sub> | H(126)...H(137)  | 366.3(73)  | 70.1(fixed)                            | — | 5.9  | 70.1  |
| <i>u</i> <sub>281</sub> | H(80)...H(112)   | 366.9(43)  | 42.8(fixed)                            | — | 7.4  | 42.8  |
| <i>u</i> <sub>467</sub> | Si(114)...H(128) | 367.0(20)  | 30.4(fixed)                            | — | 1.2  | 30.4  |
| <i>u</i> <sub>488</sub> | C(71)...H(112)   | 367.1(31)  | 31.0(fixed)                            | — | 0.5  | 31.0  |
| <i>u</i> <sub>415</sub> | H(8)...C(51)     | 367.1(143) | 93.1(fixed)                            | — | 59.8 | 93.1  |
| <i>u</i> <sub>534</sub> | Si(57)...H(66)   | 367.3(32)  | 51.2(fixed)                            | — | 7.1  | 51.2  |

|                          |                  |            |                                        |   |       |       |
|--------------------------|------------------|------------|----------------------------------------|---|-------|-------|
| <i>u</i> <sub>460</sub>  | H(22)...H(24)    | 367.3(17)  | 43.5(fixed)                            | — | -2.0  | 43.5  |
| <i>u</i> <sub>432</sub>  | C(123)...H(168)  | 367.6(27)  | 31.0(fixed)                            | — | 1.1   | 31.0  |
| <i>u</i> <sub>487</sub>  | Si(1)...H(34)    | 367.9(14)  | 30.2(fixed)                            | — | 0.7   | 30.2  |
| <i>u</i> <sub>466</sub>  | H(78)...H(86)    | 368.0(16)  | 42.6(fixed)                            | — | -1.9  | 42.6  |
| <i>u</i> <sub>494</sub>  | Si(113)...H(165) | 369.0(13)  | 28.6(fixed)                            | — | 1.4   | 28.6  |
| <i>u</i> <sub>495</sub>  | Si(57)...H(109)  | 369.1(13)  | 26.1(fixed)                            | — | 1.3   | 26.1  |
| <i>u</i> <sub>877</sub>  | C(119)...H(157)  | 369.1(120) | 65.4(fixed)                            | — | 3.0   | 65.4  |
| <i>u</i> <sub>474</sub>  | Si(57)...H(93)   | 369.2(17)  | 29.9(fixed)                            | — | 1.2   | 29.9  |
| <i>u</i> <sub>459</sub>  | Si(113)...H(149) | 369.3(17)  | 29.6(fixed)                            | — | 1.2   | 29.6  |
| <i>u</i> <sub>470</sub>  | Si(113)...H(148) | 369.5(17)  | 30.0(fixed)                            | — | 0.9   | 30.0  |
| <i>u</i> <sub>420</sub>  | H(24)...H(56)    | 369.5(45)  | 77.7(fixed)                            | — | 13.7  | 77.7  |
| <i>u</i> <sub>522</sub>  | Si(115)...H(156) | 370.1(121) | 54.0(fixed)                            | — | 23.9  | 54.0  |
| <i>u</i> <sub>828</sub>  | H(122)...H(142)  | 371.0(80)  | 82.7(fixed)                            | — | 4.1   | 82.7  |
| <i>u</i> <sub>483</sub>  | Si(1)...H(33)    | 371.0(14)  | 32.4(fixed)                            | — | 0.7   | 32.4  |
| <i>u</i> <sub>511</sub>  | Si(113)...H(129) | 371.4(35)  | 40.9(fixed)                            | — | 8.3   | 40.9  |
| <i>u</i> <sub>513</sub>  | Si(113)...H(166) | 371.4(13)  | 30.2(fixed)                            | — | 0.8   | 30.2  |
| <i>u</i> <sub>545</sub>  | Si(2)...H(54)    | 371.7(45)  | 88.5(fixed)                            | — | 21.0  | 88.5  |
| <i>u</i> <sub>381</sub>  | C(39)...H(49)    | 372.3(64)  | 79.1(fixed)                            | — | 54.2  | 79.1  |
| <i>u</i> <sub>449</sub>  | C(127)...H(167)  | 372.6(73)  | 41.6(fixed)                            | — | 5.3   | 41.6  |
| <i>u</i> <sub>503</sub>  | Si(113)...H(156) | 372.8(15)  | 30.9(fixed)                            | — | 0.9   | 30.9  |
| <i>u</i> <sub>1325</sub> | H(85)...H(110)   | 373.6(277) | 62.0(fixed)                            | — | 2.6   | 62.0  |
| <i>u</i> <sub>506</sub>  | Si(1)...H(49)    | 373.8(17)  | 29.9(fixed)                            | — | 1.9   | 29.9  |
| <i>u</i> <sub>425</sub>  | C(71)...H(111)   | 373.9(71)  | 44.0(fixed)                            | — | 8.3   | 44.0  |
| <i>u</i> <sub>509</sub>  | H(55)...H(56)    | 374.2(34)  | 26.3(fixed)                            | — | -1.2  | 26.3  |
| <i>u</i> <sub>496</sub>  | Si(57)...H(92)   | 374.5(16)  | 29.6(fixed)                            | — | 0.8   | 29.6  |
| <i>u</i> <sub>507</sub>  | Si(1)...H(36)    | 374.9(16)  | 28.3(fixed)                            | — | 0.8   | 28.3  |
| <i>u</i> <sub>429</sub>  | H(10)...C(51)    | 375.2(102) | 108.3(fixed)                           | — | 64.7  | 108.3 |
| <i>u</i> <sub>518</sub>  | Si(57)...H(100)  | 375.5(15)  | 28.0(fixed)                            | — | 0.2   | 28.0  |
| <i>u</i> <sub>661</sub>  | H(14)...C(23)    | 375.8(75)  | 98.5(fixed)                            | — | 12.5  | 98.5  |
| <i>u</i> <sub>502</sub>  | Si(4)...H(55)    | 376.0(30)  | 34.8(fixed)                            | — | 1.2   | 34.8  |
| <i>u</i> <sub>636</sub>  | Si(116)...H(145) | 376.9(70)  | 63.5(fixed)                            | — | 11.0  | 63.5  |
| <i>u</i> <sub>369</sub>  | C(7)...H(54)     | 377.5(146) | 110.9(fixed)                           | — | 85.9  | 110.9 |
| <i>u</i> <sub>515</sub>  | Si(58)...H(98)   | 378.3(37)  | 40.9(fixed)                            | — | 9.1   | 40.9  |
| <i>u</i> <sub>519</sub>  | H(14)...C(27)    | 379.3(71)  | 110.1(fixed)                           | — | 25.4  | 110.1 |
| <i>u</i> <sub>855</sub>  | H(53)...H(56)    | 379.5(84)  | 144.8(fixed)                           | — | -16.7 | 144.8 |
| <i>u</i> <sub>765</sub>  | C(119)...C(139)  | 379.5(55)  | 82.9(tied to <i>u</i> <sub>897</sub> ) | — | 3.7   | 62.0  |
| <i>u</i> <sub>542</sub>  | Si(57)...Si(59)  | 380.8(12)  | 16.2(tied to <i>u</i> <sub>544</sub> ) | — | -0.5  | 17.2  |
| <i>u</i> <sub>531</sub>  | C(7)...H(56)     | 381.3(33)  | 38.5(fixed)                            | — | -1.0  | 38.5  |
| <i>u</i> <sub>541</sub>  | Si(116)...H(120) | 381.6(36)  | 49.4(fixed)                            | — | 5.4   | 49.4  |
| <i>u</i> <sub>766</sub>  | H(130)...H(157)  | 383.4(185) | 78.1(fixed)                            | — | 17.3  | 78.1  |
| <i>u</i> <sub>475</sub>  | C(131)...H(168)  | 383.7(36)  | 35.0(fixed)                            | — | 1.4   | 35.0  |
| <i>u</i> <sub>548</sub>  | H(73)...H(112)   | 384.0(41)  | 46.7(fixed)                            | — | -0.6  | 46.7  |
| <i>u</i> <sub>508</sub>  | H(148)...H(167)  | 384.5(31)  | 51.0(fixed)                            | — | -0.1  | 51.0  |
| <i>u</i> <sub>648</sub>  | C(11)...H(25)    | 384.8(70)  | 99.9(fixed)                            | — | 26.9  | 99.9  |
| <i>u</i> <sub>816</sub>  | H(76)...H(112)   | 385.3(44)  | 37.5(fixed)                            | — | -3.2  | 37.5  |
| <i>u</i> <sub>549</sub>  | H(16)...H(56)    | 385.5(40)  | 51.0(fixed)                            | — | -1.4  | 51.0  |

|                          |                   |            |                                         |   |      |       |
|--------------------------|-------------------|------------|-----------------------------------------|---|------|-------|
| <i>u</i> <sub>670</sub>  | H(137)...H(168)   | 386.3(44)  | 50.3(fixed)                             | — | -3.6 | 50.3  |
| <i>u</i> <sub>949</sub>  | C(71)...C(95)     | 387.4(238) | 114.3(tied to <i>u</i> <sub>897</sub> ) | — | 4.4  | 85.5  |
| <i>u</i> <sub>556</sub>  | C(127)...H(168)   | 387.7(31)  | 31.9(fixed)                             | — | -0.7 | 31.9  |
| <i>u</i> <sub>785</sub>  | H(120)...H(140)   | 388.1(61)  | 84.9(fixed)                             | — | 7.6  | 84.9  |
| <i>u</i> <sub>544</sub>  | Si(1)...Si(4)     | 388.2(18)  | 17.6(6)                                 | — | -0.6 | 18.7  |
| <i>u</i> <sub>533</sub>  | Si(3)...H(36)     | 388.6(63)  | 55.7(fixed)                             | — | 17.9 | 55.7  |
| <i>u</i> <sub>528</sub>  | Si(60)...H(69)    | 388.6(38)  | 42.8(fixed)                             | — | 8.5  | 42.8  |
| <i>u</i> <sub>384</sub>  | C(79)...H(112)    | 389.2(35)  | 28.4(fixed)                             | — | 1.3  | 28.4  |
| <i>u</i> <sub>448</sub>  | C(127)...H(156)   | 389.3(240) | 71.0(fixed)                             | — | 20.0 | 71.0  |
| <i>u</i> <sub>445</sub>  | C(19)...H(55)     | 389.5(54)  | 63.9(fixed)                             | — | 18.7 | 63.9  |
| <i>u</i> <sub>630</sub>  | H(66)...H(100)    | 389.5(268) | 92.4(fixed)                             | — | 8.4  | 92.4  |
| <i>u</i> <sub>677</sub>  | H(122)...C(139)   | 389.9(64)  | 73.0(fixed)                             | — | 6.2  | 73.0  |
| <i>u</i> <sub>746</sub>  | Si(115)...H(141)  | 390.0(42)  | 55.2(fixed)                             | — | 5.2  | 55.2  |
| <i>u</i> <sub>539</sub>  | C(67)...H(112)    | 390.4(26)  | 33.6(fixed)                             | — | -0.6 | 33.6  |
| <i>u</i> <sub>557</sub>  | Si(59)...Si(60)   | 390.5(14)  | 14.0(tied to <i>u</i> <sub>544</sub> )  | — | -0.4 | 14.8  |
| <i>u</i> <sub>484</sub>  | C(63)...H(85)     | 390.7(64)  | 53.9(fixed)                             | — | 10.6 | 53.9  |
| <i>u</i> <sub>553</sub>  | Si(115)...Si(116) | 390.7(14)  | 14.4(tied to <i>u</i> <sub>544</sub> )  | — | -0.4 | 15.3  |
| <i>u</i> <sub>829</sub>  | H(121)...H(141)   | 391.6(62)  | 83.0(fixed)                             | — | 11.1 | 83.0  |
| <i>u</i> <sub>598</sub>  | H(12)...H(36)     | 391.9(122) | 84.7(fixed)                             | — | 19.1 | 84.7  |
| <i>u</i> <sub>1199</sub> | C(83)...C(107)    | 392.5(199) | 53.4(tied to <i>u</i> <sub>1043</sub> ) | — | 3.2  | 45.9  |
| <i>u</i> <sub>504</sub>  | Si(115)...H(137)  | 392.5(40)  | 44.3(fixed)                             | — | 12.1 | 44.3  |
| <i>u</i> <sub>561</sub>  | Si(113)...Si(115) | 392.8(11)  | 13.7(tied to <i>u</i> <sub>544</sub> )  | — | -0.3 | 14.6  |
| <i>u</i> <sub>379</sub>  | H(64)...C(83)     | 392.9(66)  | 54.6(fixed)                             | — | 16.1 | 54.6  |
| <i>u</i> <sub>579</sub>  | H(136)...C(139)   | 392.9(14)  | 13.6(fixed)                             | — | -4.3 | 13.6  |
| <i>u</i> <sub>588</sub>  | H(24)...C(27)     | 393.1(14)  | 15.8(fixed)                             | — | -4.8 | 15.8  |
| <i>u</i> <sub>578</sub>  | C(135)...H(142)   | 393.2(14)  | 13.7(fixed)                             | — | -4.3 | 13.7  |
| <i>u</i> <sub>587</sub>  | C(11)...H(17)     | 393.2(13)  | 13.6(fixed)                             | — | -4.7 | 13.6  |
| <i>u</i> <sub>596</sub>  | Si(6)...H(41)     | 393.3(37)  | 41.6(fixed)                             | — | 9.3  | 41.6  |
| <i>u</i> <sub>586</sub>  | C(23)...H(30)     | 393.3(14)  | 15.9(fixed)                             | — | -4.9 | 15.9  |
| <i>u</i> <sub>537</sub>  | C(23)...H(56)     | 393.5(35)  | 55.7(fixed)                             | — | 1.2  | 55.7  |
| <i>u</i> <sub>601</sub>  | C(79)...H(86)     | 393.5(14)  | 13.7(fixed)                             | — | -4.5 | 13.7  |
| <i>u</i> <sub>595</sub>  | H(13)...C(15)     | 393.5(13)  | 13.7(fixed)                             | — | -4.3 | 13.7  |
| <i>u</i> <sub>575</sub>  | H(125)...C(127)   | 393.6(13)  | 13.4(fixed)                             | — | -4.2 | 13.4  |
| <i>u</i> <sub>573</sub>  | C(123)...H(129)   | 393.7(13)  | 13.4(fixed)                             | — | -4.1 | 13.4  |
| <i>u</i> <sub>580</sub>  | H(80)...C(83)     | 394.0(14)  | 13.5(fixed)                             | — | -4.3 | 13.5  |
| <i>u</i> <sub>497</sub>  | C(11)...H(29)     | 394.2(72)  | 108.8(fixed)                            | — | 46.7 | 108.8 |
| <i>u</i> <sub>221</sub>  | H(66)...H(101)    | 394.3(202) | 89.6(fixed)                             | — | 28.0 | 89.6  |
| <i>u</i> <sub>567</sub>  | Si(3)...Si(4)     | 394.6(14)  | 15.4(tied to <i>u</i> <sub>544</sub> )  | — | -0.5 | 16.4  |
| <i>u</i> <sub>284</sub>  | C(139)...H(166)   | 394.8(145) | 55.8(fixed)                             | — | 45.6 | 55.8  |
| <i>u</i> <sub>591</sub>  | H(69)...C(71)     | 395.0(12)  | 13.6(fixed)                             | — | -4.4 | 13.6  |
| <i>u</i> <sub>839</sub>  | Si(59)...C(79)    | 395.2(30)  | 40.1(tied to <i>u</i> <sub>897</sub> )  | — | -1.0 | 30.0  |
| <i>u</i> <sub>538</sub>  | H(42)...H(49)     | 396.0(89)  | 106.4(fixed)                            | — | 33.0 | 106.4 |
| <i>u</i> <sub>706</sub>  | H(14)...H(30)     | 396.2(90)  | 152.8(fixed)                            | — | 4.2  | 152.8 |
| <i>u</i> <sub>903</sub>  | H(14)...H(24)     | 396.3(92)  | 125.3(fixed)                            | — | -7.2 | 125.3 |
| <i>u</i> <sub>611</sub>  | Si(4)...H(14)     | 396.5(38)  | 57.1(fixed)                             | — | 7.4  | 57.1  |
| <i>u</i> <sub>917</sub>  | C(119)...H(142)   | 397.3(74)  | 70.0(fixed)                             | — | -1.5 | 70.0  |



|                          |                   |            |                                        |   |      |       |
|--------------------------|-------------------|------------|----------------------------------------|---|------|-------|
| <i>u</i> <sub>571</sub>  | C(7)...H(16)      | 397.3(4)   | 13.6(fixed)                            | — | -4.7 | 13.6  |
| <i>u</i> <sub>606</sub>  | C(19)...H(29)     | 397.6(3)   | 15.7(fixed)                            | — | -5.2 | 15.7  |
| <i>u</i> <sub>1033</sub> | C(63)...H(81)     | 397.8(66)  | 55.6(fixed)                            | — | 1.5  | 55.6  |
| <i>u</i> <sub>825</sub>  | H(64)...H(111)    | 397.9(85)  | 66.3(fixed)                            | — | -2.3 | 66.3  |
| <i>u</i> <sub>572</sub>  | H(8)...C(15)      | 398.1(4)   | 13.4(fixed)                            | — | -4.1 | 13.4  |
| <i>u</i> <sub>590</sub>  | H(133)...C(139)   | 398.1(3)   | 13.7(fixed)                            | — | -4.7 | 13.7  |
| <i>u</i> <sub>593</sub>  | H(21)...C(27)     | 398.2(3)   | 15.7(fixed)                            | — | -4.5 | 15.7  |
| <i>u</i> <sub>585</sub>  | C(119)...H(126)   | 398.4(4)   | 13.5(fixed)                            | — | -4.2 | 13.5  |
| <i>u</i> <sub>592</sub>  | H(10)...C(11)     | 398.6(4)   | 13.6(fixed)                            | — | -4.2 | 13.6  |
| <i>u</i> <sub>604</sub>  | C(7)...H(14)      | 398.8(4)   | 13.7(fixed)                            | — | -4.4 | 13.7  |
| <i>u</i> <sub>602</sub>  | C(131)...H(141)   | 398.8(3)   | 13.6(fixed)                            | — | -4.1 | 13.6  |
| <i>u</i> <sub>603</sub>  | H(122)...C(123)   | 398.8(4)   | 13.4(fixed)                            | — | -3.8 | 13.4  |
| <i>u</i> <sub>599</sub>  | C(63)...H(70)     | 398.9(4)   | 12.7(fixed)                            | — | -4.3 | 12.7  |
| <i>u</i> <sub>853</sub>  | Si(115)...H(157)  | 399.1(77)  | 61.3(fixed)                            | — | 6.8  | 61.3  |
| <i>u</i> <sub>526</sub>  | H(13)...H(32)     | 399.2(119) | 66.9(fixed)                            | — | 25.3 | 66.9  |
| <i>u</i> <sub>525</sub>  | H(9)...H(36)      | 399.2(119) | 66.9(fixed)                            | — | 25.3 | 66.9  |
| <i>u</i> <sub>597</sub>  | H(66)...C(67)     | 399.3(4)   | 12.8(fixed)                            | — | -3.9 | 12.8  |
| <i>u</i> <sub>527</sub>  | H(111)...H(112)   | 399.4(50)  | 27.9(fixed)                            | — | -1.8 | 27.9  |
| <i>u</i> <sub>600</sub>  | C(63)...H(72)     | 399.6(4)   | 12.8(fixed)                            | — | -4.3 | 12.8  |
| <i>u</i> <sub>530</sub>  | H(126)...H(136)   | 399.8(78)  | 82.5(fixed)                            | — | 15.8 | 82.5  |
| <i>u</i> <sub>607</sub>  | H(64)...C(71)     | 400.0(4)   | 12.8(fixed)                            | — | -3.9 | 12.8  |
| <i>u</i> <sub>570</sub>  | H(132)...C(135)   | 400.3(5)   | 13.9(fixed)                            | — | -4.8 | 13.9  |
| <i>u</i> <sub>594</sub>  | H(77)...C(83)     | 400.5(3)   | 13.2(fixed)                            | — | -3.4 | 13.2  |
| <i>u</i> <sub>568</sub>  | C(131)...H(137)   | 400.6(5)   | 13.7(fixed)                            | — | -4.5 | 13.7  |
| <i>u</i> <sub>577</sub>  | C(75)...H(81)     | 401.0(5)   | 13.6(fixed)                            | — | -4.4 | 13.6  |
| <i>u</i> <sub>605</sub>  | C(119)...H(128)   | 401.0(4)   | 13.5(fixed)                            | — | -4.2 | 13.5  |
| <i>u</i> <sub>944</sub>  | H(125)...H(141)   | 401.1(94)  | 72.7(fixed)                            | — | 5.7  | 72.7  |
| <i>u</i> <sub>584</sub>  | C(19)...H(25)     | 401.2(5)   | 15.1(fixed)                            | — | -5.1 | 15.1  |
| <i>u</i> <sub>1002</sub> | H(121)...H(157)   | 401.3(109) | 75.9(fixed)                            | — | 4.4  | 75.9  |
| <i>u</i> <sub>550</sub>  | Si(3)...H(25)     | 401.4(34)  | 51.8(fixed)                            | — | 28.7 | 51.8  |
| <i>u</i> <sub>608</sub>  | H(120)...C(127)   | 401.4(4)   | 13.5(fixed)                            | — | -3.7 | 13.5  |
| <i>u</i> <sub>574</sub>  | H(76)...C(79)     | 401.4(5)   | 13.4(fixed)                            | — | -3.6 | 13.4  |
| <i>u</i> <sub>963</sub>  | Si(61)...H(104)   | 401.4(45)  | 46.1(fixed)                            | — | -3.6 | 46.1  |
| <i>u</i> <sub>562</sub>  | C(39)...C(47)     | 401.8(46)  | 51.9(fixed)                            | — | 31.0 | 51.9  |
| <i>u</i> <sub>583</sub>  | H(20)...C(23)     | 401.9(5)   | 14.8(fixed)                            | — | -4.9 | 14.8  |
| <i>u</i> <sub>771</sub>  | Si(2)...C(51)     | 403.2(39)  | 95.5(tied to <i>u</i> <sub>897</sub> ) | — | 2.6  | 71.4  |
| <i>u</i> <sub>619</sub>  | Si(1)...Si(3)     | 403.4(10)  | 13.7(tied to <i>u</i> <sub>544</sub> ) | — | -0.4 | 14.6  |
| <i>u</i> <sub>524</sub>  | H(13)...H(29)     | 404.2(76)  | 109.9(fixed)                           | — | 53.1 | 109.9 |
| <i>u</i> <sub>879</sub>  | Si(57)...H(86)    | 404.5(39)  | 38.5(fixed)                            | — | 4.8  | 38.5  |
| <i>u</i> <sub>558</sub>  | H(64)...H(100)    | 404.5(228) | 98.3(fixed)                            | — | 15.0 | 98.3  |
| <i>u</i> <sub>1000</sub> | H(132)...H(166)   | 404.8(268) | 99.2(fixed)                            | — | 5.5  | 99.2  |
| <i>u</i> <sub>621</sub>  | Si(113)...Si(116) | 406.1(16)  | 13.8(tied to <i>u</i> <sub>544</sub> ) | — | -0.4 | 14.6  |
| <i>u</i> <sub>576</sub>  | H(78)...H(110)    | 406.3(135) | 56.6(fixed)                            | — | 22.7 | 56.6  |
| <i>u</i> <sub>758</sub>  | H(89)...H(109)    | 406.6(68)  | 67.8(fixed)                            | — | 1.7  | 67.8  |
| <i>u</i> <sub>635</sub>  | H(34)...H(55)     | 407.0(38)  | 52.1(fixed)                            | — | -2.9 | 52.1  |
| <i>u</i> <sub>565</sub>  | Si(1)...H(8)      | 407.3(28)  | 43.5(fixed)                            | — | 8.6  | 43.5  |

|                          |                  |            |                                        |   |      |       |
|--------------------------|------------------|------------|----------------------------------------|---|------|-------|
| <i>u</i> <sub>1158</sub> | H(68)...H(80)    | 408.5(73)  | 69.0(fixed)                            | — | -9.5 | 69.0  |
| <i>u</i> <sub>614</sub>  | H(21)...H(55)    | 410.0(71)  | 107.8(fixed)                           | — | 1.8  | 107.8 |
| <i>u</i> <sub>480</sub>  | C(123)...H(136)  | 410.2(73)  | 66.5(fixed)                            | — | 14.3 | 66.5  |
| <i>u</i> <sub>618</sub>  | Si(116)...H(125) | 410.3(42)  | 38.4(fixed)                            | — | 8.1  | 38.4  |
| <i>u</i> <sub>609</sub>  | C(7)...C(51)     | 410.8(113) | 99.4(tied to <i>u</i> <sub>897</sub> ) | — | 49.5 | 74.3  |
| <i>u</i> <sub>616</sub>  | Si(115)...H(167) | 411.4(53)  | 29.4(fixed)                            | — | 0.0  | 29.4  |
| <i>u</i> <sub>776</sub>  | Si(3)...H(24)    | 411.6(45)  | 71.6(fixed)                            | — | 9.0  | 71.6  |
| <i>u</i> <sub>624</sub>  | H(41)...H(50)    | 411.7(55)  | 70.9(fixed)                            | — | 41.1 | 70.9  |
| <i>u</i> <sub>639</sub>  | C(127)...C(155)  | 411.8(197) | 66.2(tied to <i>u</i> <sub>897</sub> ) | — | 12.2 | 49.5  |
| <i>u</i> <sub>627</sub>  | Si(57)...Si(60)  | 411.8(15)  | 13.1(tied to <i>u</i> <sub>544</sub> ) | — | -0.4 | 14.0  |
| <i>u</i> <sub>728</sub>  | Si(113)...H(132) | 412.3(39)  | 43.6(fixed)                            | — | 9.0  | 43.6  |
| <i>u</i> <sub>871</sub>  | Si(1)...H(29)    | 412.8(52)  | 106.2(fixed)                           | — | -6.6 | 106.2 |
| <i>u</i> <sub>702</sub>  | H(25)...H(30)    | 412.9(22)  | 28.0(fixed)                            | — | -5.4 | 28.0  |
| <i>u</i> <sub>703</sub>  | H(80)...H(85)    | 412.9(23)  | 28.0(fixed)                            | — | -4.4 | 28.0  |
| <i>u</i> <sub>769</sub>  | H(13)...H(37)    | 413.0(156) | 78.5(fixed)                            | — | 8.6  | 78.5  |
| <i>u</i> <sub>902</sub>  | H(121)...C(155)  | 413.0(78)  | 62.8(fixed)                            | — | 11.3 | 62.8  |
| <i>u</i> <sub>559</sub>  | C(123)...C(135)  | 413.3(53)  | 35.3(tied to <i>u</i> <sub>544</sub> ) | — | 9.8  | 37.5  |
| <i>u</i> <sub>523</sub>  | Si(1)...H(20)    | 413.5(46)  | 58.9(fixed)                            | — | 25.9 | 58.9  |
| <i>u</i> <sub>709</sub>  | H(137)...H(142)  | 413.5(23)  | 28.0(fixed)                            | — | -4.5 | 28.0  |
| <i>u</i> <sub>759</sub>  | Si(57)...C(63)   | 413.9(25)  | 51.0(tied to <i>u</i> <sub>897</sub> ) | — | -0.1 | 38.1  |
| <i>u</i> <sub>733</sub>  | H(136)...H(141)  | 414.3(23)  | 28.1(fixed)                            | — | -4.6 | 28.1  |
| <i>u</i> <sub>729</sub>  | H(81)...H(86)    | 414.3(23)  | 28.7(fixed)                            | — | -4.8 | 28.7  |
| <i>u</i> <sub>719</sub>  | H(24)...H(29)    | 414.7(22)  | 29.8(fixed)                            | — | -5.0 | 29.8  |
| <i>u</i> <sub>671</sub>  | H(12)...H(17)    | 414.8(21)  | 26.6(fixed)                            | — | -4.9 | 26.6  |
| <i>u</i> <sub>762</sub>  | H(129)...H(168)  | 415.6(39)  | 41.1(fixed)                            | — | -2.8 | 41.1  |
| <i>u</i> <sub>700</sub>  | H(122)...C(163)  | 415.7(187) | 109.0(fixed)                           | — | 11.4 | 109.0 |
| <i>u</i> <sub>651</sub>  | Si(62)...H(90)   | 416.5(39)  | 43.2(fixed)                            | — | 5.7  | 43.2  |
| <i>u</i> <sub>687</sub>  | H(13)...H(18)    | 416.5(23)  | 27.9(fixed)                            | — | -4.2 | 27.9  |
| <i>u</i> <sub>712</sub>  | H(125)...H(128)  | 416.6(22)  | 27.5(fixed)                            | — | -4.6 | 27.5  |
| <i>u</i> <sub>666</sub>  | H(68)...H(73)    | 416.8(20)  | 27.2(fixed)                            | — | -4.2 | 27.2  |
| <i>u</i> <sub>714</sub>  | C(7)...H(37)     | 416.8(71)  | 90.5(fixed)                            | — | 9.9  | 90.5  |
| <i>u</i> <sub>705</sub>  | H(126)...H(129)  | 417.2(21)  | 27.7(fixed)                            | — | -4.5 | 27.7  |
| <i>u</i> <sub>678</sub>  | H(69)...H(74)    | 417.3(22)  | 27.2(fixed)                            | — | -4.4 | 27.2  |
| <i>u</i> <sub>663</sub>  | H(124)...H(129)  | 417.3(20)  | 27.1(fixed)                            | — | -4.1 | 27.1  |
| <i>u</i> <sub>726</sub>  | H(13)...H(16)    | 417.7(23)  | 27.9(fixed)                            | — | -4.4 | 27.9  |
| <i>u</i> <sub>658</sub>  | H(125)...H(130)  | 417.7(22)  | 26.6(fixed)                            | — | -4.2 | 26.6  |
| <i>u</i> <sub>662</sub>  | H(136)...H(140)  | 417.7(21)  | 27.4(fixed)                            | — | -4.7 | 27.4  |
| <i>u</i> <sub>632</sub>  | Si(116)...H(154) | 417.9(140) | 47.6(fixed)                            | — | 12.1 | 47.6  |
| <i>u</i> <sub>731</sub>  | H(14)...H(17)    | 418.4(22)  | 28.0(fixed)                            | — | -5.1 | 28.0  |
| <i>u</i> <sub>554</sub>  | H(76)...H(108)   | 418.5(184) | 59.9(fixed)                            | — | 17.8 | 59.9  |
| <i>u</i> <sub>555</sub>  | H(132)...H(168)  | 418.9(42)  | 52.2(fixed)                            | — | -0.5 | 52.2  |
| <i>u</i> <sub>638</sub>  | Si(113)...C(127) | 419.0(26)  | 27.1(fixed)                            | — | 1.8  | 27.1  |
| <i>u</i> <sub>669</sub>  | H(9)...H(14)     | 419.4(12)  | 27.7(fixed)                            | — | -4.6 | 27.7  |
| <i>u</i> <sub>680</sub>  | H(24)...H(28)    | 419.5(20)  | 28.9(fixed)                            | — | -3.8 | 28.9  |
| <i>u</i> <sub>674</sub>  | H(138)...H(142)  | 419.6(20)  | 28.0(fixed)                            | — | -4.3 | 28.0  |
| <i>u</i> <sub>688</sub>  | H(82)...H(86)    | 419.7(20)  | 26.8(fixed)                            | — | -4.5 | 26.8  |

|                          |                  |            |                                         |   |      |       |
|--------------------------|------------------|------------|-----------------------------------------|---|------|-------|
| <i>u</i> <sub>439</sub>  | H(81)...H(112)   | 420.0(42)  | 48.0(fixed)                             | — | 1.2  | 48.0  |
| <i>u</i> <sub>643</sub>  | H(132)...H(138)  | 420.6(12)  | 27.8(fixed)                             | — | -4.7 | 27.8  |
| <i>u</i> <sub>713</sub>  | H(69)...H(72)    | 420.7(22)  | 27.3(fixed)                             | — | -4.7 | 27.3  |
| <i>u</i> <sub>673</sub>  | H(10)...H(12)    | 421.1(12)  | 28.2(fixed)                             | — | -4.3 | 28.2  |
| <i>u</i> <sub>645</sub>  | H(134)...H(137)  | 421.2(12)  | 28.4(fixed)                             | — | -4.1 | 28.4  |
| <i>u</i> <sub>640</sub>  | H(42)...C(47)    | 421.3(68)  | 72.5(fixed)                             | — | 27.5 | 72.5  |
| <i>u</i> <sub>653</sub>  | H(8)...H(18)     | 421.6(14)  | 27.4(fixed)                             | — | -3.9 | 27.4  |
| <i>u</i> <sub>1067</sub> | H(73)...H(96)    | 421.6(291) | 101.1(fixed)                            | — | 1.3  | 101.1 |
| <i>u</i> <sub>510</sub>  | H(120)...C(135)  | 421.8(71)  | 69.1(fixed)                             | — | 9.4  | 69.1  |
| <i>u</i> <sub>699</sub>  | H(26)...H(30)    | 422.0(19)  | 30.2(fixed)                             | — | -3.9 | 30.2  |
| <i>u</i> <sub>694</sub>  | H(10)...H(16)    | 422.1(13)  | 27.2(fixed)                             | — | -5.2 | 27.2  |
| <i>u</i> <sub>720</sub>  | H(70)...H(73)    | 422.1(20)  | 27.8(fixed)                             | — | -4.4 | 27.8  |
| <i>u</i> <sub>668</sub>  | H(9)...H(16)     | 422.2(13)  | 27.5(fixed)                             | — | -5.0 | 27.5  |
| <i>u</i> <sub>681</sub>  | H(133)...H(140)  | 422.2(11)  | 27.0(fixed)                             | — | -5.2 | 27.0  |
| <i>u</i> <sub>625</sub>  | H(129)...H(158)  | 422.4(239) | 62.1(fixed)                             | — | 15.3 | 62.1  |
| <i>u</i> <sub>754</sub>  | Si(3)...C(23)    | 422.6(30)  | 50.7(tied to <i>u</i> <sub>897</sub> )  | — | 11.7 | 37.9  |
| <i>u</i> <sub>652</sub>  | H(78)...H(81)    | 422.6(12)  | 26.6(fixed)                             | — | -4.8 | 26.6  |
| <i>u</i> <sub>685</sub>  | H(80)...H(84)    | 422.7(20)  | 27.8(fixed)                             | — | -4.4 | 27.8  |
| <i>u</i> <sub>633</sub>  | H(150)...H(161)  | 422.8(58)  | 57.4(fixed)                             | — | 16.0 | 57.4  |
| <i>u</i> <sub>665</sub>  | H(77)...H(84)    | 422.8(10)  | 25.5(fixed)                             | — | -3.1 | 25.5  |
| <i>u</i> <sub>711</sub>  | Si(57)...C(71)   | 422.8(28)  | 40.4(tied to <i>u</i> <sub>897</sub> )  | — | 0.5  | 30.2  |
| <i>u</i> <sub>906</sub>  | C(75)...H(109)   | 422.9(84)  | 54.0(fixed)                             | — | 4.8  | 54.0  |
| <i>u</i> <sub>697</sub>  | H(121)...H(126)  | 422.9(12)  | 26.8(fixed)                             | — | -4.7 | 26.8  |
| <i>u</i> <sub>690</sub>  | H(65)...H(70)    | 422.9(12)  | 25.7(fixed)                             | — | -4.6 | 25.7  |
| <i>u</i> <sub>683</sub>  | H(22)...H(29)    | 423.0(10)  | 28.9(fixed)                             | — | -4.1 | 28.9  |
| <i>u</i> <sub>660</sub>  | H(69)...H(112)   | 423.0(30)  | 47.8(fixed)                             | — | -2.7 | 47.8  |
| <i>u</i> <sub>745</sub>  | H(128)...H(157)  | 423.2(211) | 78.9(fixed)                             | — | 14.7 | 78.9  |
| <i>u</i> <sub>675</sub>  | H(121)...H(128)  | 423.2(13)  | 25.7(fixed)                             | — | -4.4 | 25.7  |
| <i>u</i> <sub>874</sub>  | H(18)...H(24)    | 423.4(67)  | 106.4(fixed)                            | — | 22.6 | 106.4 |
| <i>u</i> <sub>742</sub>  | H(20)...H(29)    | 423.6(11)  | 28.4(fixed)                             | — | -5.9 | 28.4  |
| <i>u</i> <sub>691</sub>  | H(122)...H(124)  | 423.6(11)  | 26.5(fixed)                             | — | -3.7 | 26.5  |
| <i>u</i> <sub>724</sub>  | H(21)...H(30)    | 423.7(11)  | 29.5(fixed)                             | — | -4.7 | 29.5  |
| <i>u</i> <sub>704</sub>  | H(120)...H(126)  | 423.7(13)  | 26.6(fixed)                             | — | -4.6 | 26.6  |
| <i>u</i> <sub>809</sub>  | Si(113)...H(122) | 423.8(32)  | 44.4(fixed)                             | — | 4.2  | 44.4  |
| <i>u</i> <sub>676</sub>  | H(78)...H(85)    | 423.8(12)  | 25.9(fixed)                             | — | -4.7 | 25.9  |
| <i>u</i> <sub>684</sub>  | H(120)...H(130)  | 423.9(14)  | 27.0(fixed)                             | — | -3.6 | 27.0  |
| <i>u</i> <sub>716</sub>  | H(133)...H(142)  | 424.1(11)  | 27.2(fixed)                             | — | -5.2 | 27.2  |
| <i>u</i> <sub>209</sub>  | H(141)...H(166)  | 424.1(168) | 82.5(fixed)                             | — | 53.4 | 82.5  |
| <i>u</i> <sub>686</sub>  | H(134)...H(141)  | 424.1(11)  | 27.7(fixed)                             | — | -4.2 | 27.7  |
| <i>u</i> <sub>736</sub>  | H(132)...H(141)  | 424.3(11)  | 27.7(fixed)                             | — | -4.2 | 27.7  |
| <i>u</i> <sub>682</sub>  | H(21)...H(28)    | 424.3(11)  | 29.6(fixed)                             | — | -3.5 | 29.6  |
| <i>u</i> <sub>693</sub>  | H(65)...H(72)    | 424.6(13)  | 25.9(fixed)                             | — | -4.5 | 25.9  |
| <i>u</i> <sub>730</sub>  | H(145)...H(148)  | 424.6(12)  | 27.4(fixed)                             | — | -3.8 | 27.4  |
| <i>u</i> <sub>727</sub>  | H(66)...H(69)    | 424.6(12)  | 26.3(fixed)                             | — | -4.1 | 26.3  |
| <i>u</i> <sub>835</sub>  | Si(115)...C(155) | 424.7(89)  | 42.8(tied to <i>u</i> <sub>1043</sub> ) | — | 8.8  | 36.8  |
| <i>u</i> <sub>692</sub>  | H(64)...H(74)    | 424.9(14)  | 26.2(fixed)                             | — | -3.9 | 26.2  |

|                          |                  |            |                                        |   |      |       |
|--------------------------|------------------|------------|----------------------------------------|---|------|-------|
| <i>u</i> <sub>756</sub>  | Si(116)...C(119) | 424.9(30)  | 46.7(tied to <i>u</i> <sub>897</sub> ) | — | 0.0  | 34.9  |
| <i>u</i> <sub>707</sub>  | H(8)...H(17)     | 425.0(16)  | 28.2(fixed)                            | — | -4.2 | 28.2  |
| <i>u</i> <sub>659</sub>  | H(20)...H(26)    | 425.0(12)  | 27.4(fixed)                            | — | -4.0 | 27.4  |
| <i>u</i> <sub>664</sub>  | H(76)...H(82)    | 425.0(12)  | 27.3(fixed)                            | — | -3.4 | 27.3  |
| <i>u</i> <sub>1770</sub> | H(74)...H(98)    | 425.1(283) | 66.2(fixed)                            | — | -8.5 | 66.2  |
| <i>u</i> <sub>698</sub>  | H(66)...H(68)    | 425.1(12)  | 26.3(fixed)                            | — | -3.8 | 26.3  |
| <i>u</i> <sub>695</sub>  | Si(60)...C(67)   | 425.3(33)  | 37.8(tied to <i>u</i> <sub>897</sub> ) | — | 1.0  | 28.3  |
| <i>u</i> <sub>282</sub>  | H(64)...H(86)    | 425.4(84)  | 76.3(fixed)                            | — | 20.3 | 76.3  |
| <i>u</i> <sub>722</sub>  | H(76)...H(85)    | 425.4(10)  | 26.2(fixed)                            | — | -5.0 | 26.2  |
| <i>u</i> <sub>610</sub>  | H(72)...H(111)   | 425.4(92)  | 63.3(fixed)                            | — | 1.8  | 63.3  |
| <i>u</i> <sub>732</sub>  | H(64)...H(70)    | 425.4(13)  | 26.0(fixed)                            | — | -4.7 | 26.0  |
| <i>u</i> <sub>672</sub>  | H(22)...H(25)    | 425.5(12)  | 28.0(fixed)                            | — | -4.4 | 28.0  |
| <i>u</i> <sub>882</sub>  | H(132)...H(165)  | 425.5(197) | 110.0(fixed)                           | — | 21.7 | 110.0 |
| <i>u</i> <sub>761</sub>  | H(126)...C(135)  | 425.6(64)  | 60.3(fixed)                            | — | 4.7  | 60.3  |
| <i>u</i> <sub>623</sub>  | H(130)...H(156)  | 425.6(264) | 82.4(fixed)                            | — | 20.7 | 82.4  |
| <i>u</i> <sub>801</sub>  | C(11)...C(35)    | 425.7(109) | 84.8(tied to <i>u</i> <sub>897</sub> ) | — | 6.1  | 63.4  |
| <i>u</i> <sub>383</sub>  | H(77)...H(110)   | 425.7(195) | 74.2(fixed)                            | — | 21.4 | 74.2  |
| <i>u</i> <sub>725</sub>  | H(66)...H(72)    | 426.1(13)  | 25.8(fixed)                            | — | -4.7 | 25.8  |
| <i>u</i> <sub>615</sub>  | H(125)...H(138)  | 426.4(62)  | 51.3(fixed)                            | — | 18.7 | 51.3  |
| <i>u</i> <sub>741</sub>  | H(10)...H(13)    | 426.8(12)  | 27.2(fixed)                            | — | -4.5 | 27.2  |
| <i>u</i> <sub>737</sub>  | H(64)...H(73)    | 426.8(15)  | 26.2(fixed)                            | — | -4.1 | 26.2  |
| <i>u</i> <sub>679</sub>  | C(7)...C(35)     | 427.0(94)  | 78.6(tied to <i>u</i> <sub>897</sub> ) | — | 10.8 | 58.7  |
| <i>u</i> <sub>701</sub>  | H(25)...H(56)    | 427.4(41)  | 74.7(fixed)                            | — | -4.8 | 74.7  |
| <i>u</i> <sub>501</sub>  | C(119)...H(137)  | 428.9(74)  | 69.7(fixed)                            | — | 15.7 | 69.7  |
| <i>u</i> <sub>873</sub>  | H(65)...H(111)   | 428.9(54)  | 61.0(fixed)                            | — | 0.7  | 61.0  |
| <i>u</i> <sub>751</sub>  | H(8)...H(14)     | 429.1(13)  | 27.0(fixed)                            | — | -4.9 | 27.0  |
| <i>u</i> <sub>628</sub>  | H(8)...H(38)     | 429.5(129) | 70.7(fixed)                            | — | 18.1 | 70.7  |
| <i>u</i> <sub>740</sub>  | C(75)...C(107)   | 430.2(114) | 58.9(tied to <i>u</i> <sub>897</sub> ) | — | 10.1 | 44.0  |
| <i>u</i> <sub>748</sub>  | H(77)...H(86)    | 430.3(12)  | 27.5(fixed)                            | — | -3.6 | 27.5  |
| <i>u</i> <sub>710</sub>  | H(76)...H(80)    | 430.4(13)  | 27.9(fixed)                            | — | -3.9 | 27.9  |
| <i>u</i> <sub>1048</sub> | Si(59)...H(98)   | 430.6(165) | 50.7(fixed)                            | — | -0.4 | 50.7  |
| <i>u</i> <sub>715</sub>  | H(21)...H(25)    | 431.0(13)  | 27.7(fixed)                            | — | -5.7 | 27.7  |
| <i>u</i> <sub>755</sub>  | H(122)...H(128)  | 431.0(13)  | 26.9(fixed)                            | — | -4.9 | 26.9  |
| <i>u</i> <sub>734</sub>  | H(77)...H(81)    | 431.4(14)  | 27.1(fixed)                            | — | -5.0 | 27.1  |
| <i>u</i> <sub>744</sub>  | H(120)...H(129)  | 431.5(15)  | 26.7(fixed)                            | — | -4.0 | 26.7  |
| <i>u</i> <sub>738</sub>  | H(132)...H(136)  | 432.2(13)  | 28.4(fixed)                            | — | -5.5 | 28.4  |
| <i>u</i> <sub>957</sub>  | Si(59)...H(98)   | 432.4(167) | 67.1(fixed)                            | — | 5.8  | 67.1  |
| <i>u</i> <sub>717</sub>  | H(133)...H(137)  | 432.5(13)  | 28.3(fixed)                            | — | -5.0 | 28.3  |
| <i>u</i> <sub>992</sub>  | H(120)...C(155)  | 432.6(96)  | 50.4(fixed)                            | — | 4.8  | 50.4  |
| <i>u</i> <sub>967</sub>  | C(91)...H(106)   | 432.8(51)  | 52.7(fixed)                            | — | -1.1 | 52.7  |
| <i>u</i> <sub>980</sub>  | C(119)...H(158)  | 432.9(77)  | 60.1(fixed)                            | — | 7.4  | 60.1  |
| <i>u</i> <sub>1055</sub> | H(72)...H(96)    | 433.2(250) | 113.1(fixed)                           | — | 4.3  | 113.1 |
| <i>u</i> <sub>637</sub>  | Si(115)...C(135) | 433.2(33)  | 28.0(fixed)                            | — | 3.4  | 28.0  |
| <i>u</i> <sub>644</sub>  | Si(113)...H(128) | 433.5(44)  | 50.0(fixed)                            | — | 1.7  | 50.0  |
| <i>u</i> <sub>206</sub>  | H(69)...H(85)    | 433.5(95)  | 75.2(fixed)                            | — | 26.6 | 75.2  |
| <i>u</i> <sub>743</sub>  | H(20)...H(24)    | 433.7(14)  | 28.3(fixed)                            | — | -5.3 | 28.3  |

|                          |                  |            |                                         |   |      |       |
|--------------------------|------------------|------------|-----------------------------------------|---|------|-------|
| <i>u</i> <sub>832</sub>  | H(9)...H(53)     | 433.8(120) | 128.8(fixed)                            | — | 52.4 | 128.8 |
| <i>u</i> <sub>880</sub>  | Si(115)...C(139) | 434.2(35)  | 49.8(tied to <i>u</i> <sub>897</sub> )  | — | -1.2 | 37.2  |
| <i>u</i> <sub>798</sub>  | Si(6)...C(39)    | 434.6(28)  | 34.7(tied to <i>u</i> <sub>897</sub> )  | — | 0.7  | 25.9  |
| <i>u</i> <sub>891</sub>  | H(70)...H(82)    | 434.7(71)  | 72.5(fixed)                             | — | 0.5  | 72.5  |
| <i>u</i> <sub>841</sub>  | H(41)...H(53)    | 434.9(87)  | 135.2(fixed)                            | — | 5.3  | 135.2 |
| <i>u</i> <sub>718</sub>  | H(10)...H(52)    | 435.2(116) | 102.0(fixed)                            | — | 48.4 | 102.0 |
| <i>u</i> <sub>775</sub>  | Si(60)...H(70)   | 436.2(44)  | 49.6(fixed)                             | — | 0.0  | 49.6  |
| <i>u</i> <sub>521</sub>  | Si(59)...H(85)   | 436.3(47)  | 39.2(fixed)                             | — | 7.7  | 39.2  |
| <i>u</i> <sub>793</sub>  | H(20)...H(44)    | 436.4(160) | 147.4(fixed)                            | — | 48.6 | 147.4 |
| <i>u</i> <sub>642</sub>  | H(10)...H(36)    | 436.4(139) | 67.4(fixed)                             | — | 13.4 | 67.4  |
| <i>u</i> <sub>914</sub>  | C(11)...C(23)    | 437.5(59)  | 104.0(tied to <i>u</i> <sub>897</sub> ) | — | 4.7  | 77.7  |
| <i>u</i> <sub>784</sub>  | H(8)...H(52)     | 437.7(152) | 91.5(fixed)                             | — | 39.3 | 91.5  |
| <i>u</i> <sub>802</sub>  | C(11)...C(27)    | 438.0(61)  | 120.9(tied to <i>u</i> <sub>897</sub> ) | — | 14.0 | 90.4  |
| <i>u</i> <sub>650</sub>  | Si(5)...H(8)     | 438.2(92)  | 50.5(fixed)                             | — | 14.0 | 50.5  |
| <i>u</i> <sub>783</sub>  | Si(57)...H(106)  | 438.8(10)  | 14.5(fixed)                             | — | -4.7 | 14.5  |
| <i>u</i> <sub>799</sub>  | Si(4)...H(34)    | 439.7(87)  | 64.0(fixed)                             | — | 11.1 | 64.0  |
| <i>u</i> <sub>791</sub>  | Si(1)...H(40)    | 439.8(8)   | 15.4(fixed)                             | — | -5.3 | 15.4  |
| <i>u</i> <sub>824</sub>  | Si(4)...C(11)    | 440.3(31)  | 54.5(tied to <i>u</i> <sub>897</sub> )  | — | -0.6 | 40.7  |
| <i>u</i> <sub>767</sub>  | H(120)...H(166)  | 440.5(180) | 122.6(fixed)                            | — | 15.2 | 122.6 |
| <i>u</i> <sub>1406</sub> | C(83)...H(108)   | 441.0(198) | 58.1(fixed)                             | — | 1.7  | 58.1  |
| <i>u</i> <sub>752</sub>  | Si(5)...H(53)    | 441.0(46)  | 75.3(fixed)                             | — | 15.7 | 75.3  |
| <i>u</i> <sub>1025</sub> | Si(60)...C(107)  | 441.0(85)  | 31.9(fixed)                             | — | 3.8  | 31.9  |
| <i>u</i> <sub>794</sub>  | Si(113)...H(162) | 441.1(10)  | 15.4(fixed)                             | — | -4.7 | 15.4  |
| <i>u</i> <sub>954</sub>  | Si(3)...H(53)    | 441.2(86)  | 121.9(fixed)                            | — | 15.0 | 121.9 |
| <i>u</i> <sub>800</sub>  | Si(57)...H(88)   | 441.3(7)   | 14.2(fixed)                             | — | -4.1 | 14.2  |
| <i>u</i> <sub>797</sub>  | Si(57)...H(96)   | 442.0(8)   | 14.1(fixed)                             | — | -4.6 | 14.1  |
| <i>u</i> <sub>792</sub>  | Si(1)...H(46)    | 442.1(9)   | 15.4(fixed)                             | — | -3.6 | 15.4  |
| <i>u</i> <sub>778</sub>  | Si(2)...H(36)    | 442.6(36)  | 42.7(fixed)                             | — | 6.9  | 42.7  |
| <i>u</i> <sub>655</sub>  | H(40)...H(49)    | 442.7(63)  | 80.3(fixed)                             | — | 50.1 | 80.3  |
| <i>u</i> <sub>819</sub>  | Si(113)...H(144) | 443.0(7)   | 14.7(fixed)                             | — | -4.0 | 14.7  |
| <i>u</i> <sub>656</sub>  | Si(113)...H(142) | 443.0(44)  | 55.2(fixed)                             | — | 6.9  | 55.2  |
| <i>u</i> <sub>859</sub>  | Si(57)...H(64)   | 443.4(34)  | 53.0(fixed)                             | — | -2.4 | 53.0  |
| <i>u</i> <sub>820</sub>  | Si(57)...H(108)  | 443.8(7)   | 13.8(fixed)                             | — | -4.6 | 13.8  |
| <i>u</i> <sub>806</sub>  | Si(113)...H(152) | 443.8(8)   | 14.9(fixed)                             | — | -4.5 | 14.9  |
| <i>u</i> <sub>814</sub>  | Si(1)...H(52)    | 444.5(7)   | 15.3(fixed)                             | — | -3.5 | 15.3  |
| <i>u</i> <sub>964</sub>  | H(13)...H(25)    | 444.7(80)  | 109.3(fixed)                            | — | 9.0  | 109.3 |
| <i>u</i> <sub>862</sub>  | Si(113)...C(131) | 445.2(33)  | 35.7(tied to <i>u</i> <sub>897</sub> )  | — | 1.0  | 26.7  |
| <i>u</i> <sub>804</sub>  | Si(113)...H(158) | 445.4(8)   | 15.5(fixed)                             | — | -5.1 | 15.5  |
| <i>u</i> <sub>830</sub>  | Si(116)...H(122) | 445.5(41)  | 48.4(fixed)                             | — | -1.0 | 48.4  |
| <i>u</i> <sub>807</sub>  | Si(1)...H(50)    | 445.8(10)  | 16.2(fixed)                             | — | -4.0 | 16.2  |
| <i>u</i> <sub>749</sub>  | Si(1)...C(19)    | 446.1(37)  | 57.3(tied to <i>u</i> <sub>897</sub> )  | — | 7.9  | 42.9  |
| <i>u</i> <sub>796</sub>  | Si(113)...H(150) | 446.6(9)   | 15.0(fixed)                             | — | -4.6 | 15.0  |
| <i>u</i> <sub>803</sub>  | Si(1)...H(32)    | 446.7(7)   | 15.8(fixed)                             | — | -4.8 | 15.8  |
| <i>u</i> <sub>821</sub>  | Si(1)...H(38)    | 446.8(9)   | 15.2(fixed)                             | — | -4.7 | 15.2  |
| <i>u</i> <sub>772</sub>  | H(96)...H(112)   | 447.2(67)  | 48.0(fixed)                             | — | 3.7  | 48.0  |
| <i>u</i> <sub>757</sub>  | C(119)...H(166)  | 447.4(208) | 117.1(fixed)                            | — | 12.7 | 117.1 |

|                          |                  |            |                                         |   |       |       |
|--------------------------|------------------|------------|-----------------------------------------|---|-------|-------|
| <i>u</i> <sub>826</sub>  | Si(113)...H(164) | 447.4(7)   | 15.0(fixed)                             | — | -4.5  | 15.0  |
| <i>u</i> <sub>823</sub>  | Si(57)...H(102)  | 447.7(8)   | 13.9(fixed)                             | — | -3.7  | 13.9  |
| <i>u</i> <sub>805</sub>  | Si(57)...H(94)   | 447.7(9)   | 14.4(fixed)                             | — | -4.8  | 14.4  |
| <i>u</i> <sub>916</sub>  | H(28)...H(55)    | 448.4(64)  | 102.2(fixed)                            | — | -4.0  | 102.2 |
| <i>u</i> <sub>790</sub>  | Si(1)...C(7)     | 448.4(22)  | 37.2(tied to <i>u</i> <sub>897</sub> )  | — | 1.4   | 27.8  |
| <i>u</i> <sub>723</sub>  | Si(3)...H(54)    | 448.6(85)  | 73.5(fixed)                             | — | 47.5  | 73.5  |
| <i>u</i> <sub>827</sub>  | Si(116)...C(123) | 448.6(33)  | 34.1(tied to <i>u</i> <sub>897</sub> )  | — | 0.2   | 25.5  |
| <i>u</i> <sub>988</sub>  | Si(57)...C(83)   | 448.7(33)  | 30.9(tied to <i>u</i> <sub>897</sub> )  | — | -0.8  | 23.1  |
| <i>u</i> <sub>808</sub>  | C(63)...H(100)   | 448.8(235) | 84.2(fixed)                             | — | 6.2   | 84.2  |
| <i>u</i> <sub>667</sub>  | Si(115)...H(136) | 449.5(47)  | 51.9(fixed)                             | — | 2.9   | 51.9  |
| <i>u</i> <sub>896</sub>  | H(12)...H(25)    | 449.7(67)  | 104.1(fixed)                            | — | 30.9  | 104.1 |
| <i>u</i> <sub>946</sub>  | Si(113)...H(133) | 450.9(44)  | 46.9(fixed)                             | — | -0.8  | 46.9  |
| <i>u</i> <sub>382</sub>  | Si(57)...H(102)  | 451.1(8)   | 14.6(fixed)                             | — | -0.3  | 14.6  |
| <i>u</i> <sub>1141</sub> | H(120)...H(157)  | 451.5(148) | 66.9(fixed)                             | — | -5.4  | 66.9  |
| <i>u</i> <sub>885</sub>  | H(122)...H(164)  | 452.1(192) | 122.5(fixed)                            | — | 10.2  | 122.5 |
| <i>u</i> <sub>1040</sub> | C(123)...H(141)  | 452.6(74)  | 62.7(fixed)                             | — | 0.1   | 62.7  |
| <i>u</i> <sub>840</sub>  | Si(57)...H(72)   | 453.9(43)  | 51.5(fixed)                             | — | -2.4  | 51.5  |
| <i>u</i> <sub>735</sub>  | Si(116)...H(166) | 454.0(123) | 50.0(fixed)                             | — | 16.9  | 50.0  |
| <i>u</i> <sub>868</sub>  | C(27)...H(56)    | 454.1(22)  | 18.5(fixed)                             | — | -10.6 | 18.5  |
| <i>u</i> <sub>870</sub>  | Si(6)...H(42)    | 454.5(43)  | 49.0(fixed)                             | — | -1.0  | 49.0  |
| <i>u</i> <sub>852</sub>  | Si(60)...C(63)   | 454.8(30)  | 39.6(tied to <i>u</i> <sub>897</sub> )  | — | -0.4  | 29.6  |
| <i>u</i> <sub>1260</sub> | H(65)...H(81)    | 454.8(66)  | 62.1(fixed)                             | — | 0.5   | 62.1  |
| <i>u</i> <sub>892</sub>  | H(138)...H(168)  | 456.5(32)  | 37.2(fixed)                             | — | -5.5  | 37.2  |
| <i>u</i> <sub>884</sub>  | H(130)...C(155)  | 456.8(211) | 61.7(fixed)                             | — | 10.6  | 61.7  |
| <i>u</i> <sub>1548</sub> | C(83)...H(109)   | 457.1(234) | 51.6(fixed)                             | — | -4.1  | 51.6  |
| <i>u</i> <sub>837</sub>  | H(14)...H(28)    | 457.8(67)  | 102.4(fixed)                            | — | 21.3  | 102.4 |
| <i>u</i> <sub>959</sub>  | H(78)...H(112)   | 457.9(32)  | 30.8(fixed)                             | — | -4.8  | 30.8  |
| <i>u</i> <sub>856</sub>  | H(22)...H(56)    | 458.0(32)  | 42.0(fixed)                             | — | -0.7  | 42.0  |
| <i>u</i> <sub>1036</sub> | C(11)...H(24)    | 458.0(74)  | 105.5(fixed)                            | — | -9.4  | 105.5 |
| <i>u</i> <sub>854</sub>  | H(13)...H(30)    | 458.4(83)  | 138.8(fixed)                            | — | 13.5  | 138.8 |
| <i>u</i> <sub>867</sub>  | Si(3)...C(35)    | 458.7(55)  | 61.0(tied to <i>u</i> <sub>897</sub> )  | — | 4.5   | 45.6  |
| <i>u</i> <sub>626</sub>  | Si(57)...H(76)   | 459.2(40)  | 43.1(fixed)                             | — | 4.5   | 43.1  |
| <i>u</i> <sub>848</sub>  | H(18)...H(56)    | 459.2(28)  | 32.4(fixed)                             | — | -5.9  | 32.4  |
| <i>u</i> <sub>654</sub>  | C(63)...C(83)    | 459.9(56)  | 41.9(tied to <i>u</i> <sub>544</sub> )  | — | 4.1   | 44.5  |
| <i>u</i> <sub>657</sub>  | H(9)...H(54)     | 459.9(150) | 111.5(fixed)                            | — | 67.5  | 111.5 |
| <i>u</i> <sub>1061</sub> | H(121)...H(158)  | 460.0(102) | 77.7(fixed)                             | — | 7.6   | 77.7  |
| <i>u</i> <sub>566</sub>  | H(140)...H(166)  | 460.1(163) | 60.8(fixed)                             | — | 40.7  | 60.8  |
| <i>u</i> <sub>969</sub>  | Si(116)...C(143) | 460.5(64)  | 59.2(tied to <i>u</i> <sub>1043</sub> ) | — | 1.9   | 50.9  |
| <i>u</i> <sub>1046</sub> | H(132)...C(163)  | 461.1(217) | 93.6(fixed)                             | — | 9.0   | 93.6  |
| <i>u</i> <sub>979</sub>  | H(14)...H(26)    | 461.3(73)  | 96.0(fixed)                             | — | 11.6  | 96.0  |
| <i>u</i> <sub>851</sub>  | C(83)...H(112)   | 461.7(22)  | 16.7(fixed)                             | — | -2.7  | 16.7  |
| <i>u</i> <sub>833</sub>  | H(13)...C(27)    | 461.9(66)  | 97.4(fixed)                             | — | 19.4  | 97.4  |
| <i>u</i> <sub>1017</sub> | H(125)...C(139)  | 462.2(73)  | 54.1(fixed)                             | — | 2.5   | 54.1  |
| <i>u</i> <sub>857</sub>  | C(119)...H(168)  | 462.3(20)  | 16.7(fixed)                             | — | -3.5  | 16.7  |
| <i>u</i> <sub>864</sub>  | C(63)...H(112)   | 462.7(21)  | 15.6(fixed)                             | — | -3.7  | 15.6  |
| <i>u</i> <sub>385</sub>  | H(64)...H(101)   | 463.0(144) | 103.0(fixed)                            | — | 20.4  | 103.0 |

|                          |                   |            |                                         |          |       |       |
|--------------------------|-------------------|------------|-----------------------------------------|----------|-------|-------|
| <i>u</i> <sub>886</sub>  | H(10)...H(37)     | 463.2(93)  | 105.2(fixed)                            | —        | 5.0   | 105.2 |
| <i>u</i> <sub>872</sub>  | C(139)...H(168)   | 463.7(20)  | 16.6(fixed)                             | —        | -4.6  | 16.6  |
| <i>u</i> <sub>913</sub>  | Si(113)...C(119)  | 463.9(23)  | 37.7(tied to <i>u</i> <sub>897</sub> )  | —        | -0.8  | 28.2  |
| <i>u</i> <sub>1008</sub> | Si(115)...H(142)  | 464.0(47)  | 45.1(fixed)                             | —        | -4.0  | 45.1  |
| <i>u</i> <sub>866</sub>  | C(11)...H(56)     | 465.2(21)  | 16.3(fixed)                             | —        | -4.1  | 16.3  |
| <i>u</i> <sub>842</sub>  | H(150)...H(167)   | 465.7(27)  | 31.6(fixed)                             | —        | -5.0  | 31.6  |
| <i>u</i> <sub>875</sub>  | H(74)...H(112)    | 465.7(30)  | 32.5(fixed)                             | —        | -5.3  | 32.5  |
| <i>u</i> <sub>904</sub>  | C(11)...H(30)     | 465.9(75)  | 130.9(fixed)                            | —        | 0.4   | 130.9 |
| <i>u</i> <sub>878</sub>  | Si(3)...C(27)     | 466.2(35)  | 75.2(tied to <i>u</i> <sub>897</sub> )  | —        | 1.2   | 56.2  |
| <i>u</i> <sub>911</sub>  | H(14)...H(32)     | 466.2(75)  | 96.8(fixed)                             | —        | 7.3   | 96.8  |
| <i>u</i> <sub>910</sub>  | H(9)...H(37)      | 466.3(75)  | 96.8(fixed)                             | —        | 7.3   | 96.8  |
| <i>u</i> <sub>689</sub>  | Si(59)...C(83)    | 466.9(36)  | 38.7(tied to <i>u</i> <sub>897</sub> )  | —        | 0.5   | 29.0  |
| <i>u</i> <sub>849</sub>  | H(130)...H(167)   | 467.0(79)  | 44.7(fixed)                             | —        | -1.0  | 44.7  |
| <i>u</i> <sub>1221</sub> | Si(60)...H(109)   | 467.1(113) | 43.2(fixed)                             | —        | -1.2  | 43.2  |
| <i>u</i> <sub>1064</sub> | Si(57)...H(85)    | 467.2(44)  | 34.5(fixed)                             | —        | -2.2  | 34.5  |
| <i>u</i> <sub>945</sub>  | H(30)...H(56)     | 468.8(28)  | 37.8(fixed)                             | —        | -11.6 | 37.8  |
| <i>u</i> <sub>1578</sub> | H(84)...H(108)    | 469.2(209) | 71.7(fixed)                             | —        | 1.2   | 71.7  |
| <i>u</i> <sub>1160</sub> | C(63)...C(79)     | 469.4(53)  | 47.4(tied to <i>u</i> <sub>1043</sub> ) | —        | -4.1  | 40.7  |
| <i>u</i> <sub>789</sub>  | H(46)...H(56)     | 469.6(52)  | 58.0(fixed)                             | —        | 13.0  | 58.0  |
| <i>u</i> <sub>850</sub>  | Si(1)...H(10)     | 469.8(32)  | 46.5(fixed)                             | —        | 0.2   | 46.5  |
| <i>u</i> <sub>485</sub>  | H(69)...C(83)     | 470.1(72)  | 62.7(fixed)                             | —        | 12.6  | 62.7  |
| <i>u</i> <sub>869</sub>  | H(77)...H(109)    | 470.2(108) | 70.7(fixed)                             | —        | 6.2   | 70.7  |
| <i>u</i> <sub>889</sub>  | Si(1)...C(11)     | 472.7(28)  | 38.5(tied to <i>u</i> <sub>897</sub> )  | —        | -0.2  | 28.8  |
| <i>u</i> <sub>764</sub>  | H(64)...H(84)     | 472.9(66)  | 57.5(fixed)                             | —        | 9.0   | 57.5  |
| <i>u</i> <sub>535</sub>  | Si(60)...H(100)   | 472.9(126) | 49.5(fixed)                             | —        | 13.1  | 49.5  |
| <i>u</i> <sub>847</sub>  | Si(1)...H(21)     | 473.0(45)  | 74.9(fixed)                             | —        | 0.5   | 74.9  |
| <i>u</i> <sub>863</sub>  | H(66)...C(83)     | 473.0(62)  | 59.4(fixed)                             | —        | -0.3  | 59.4  |
| <i>u</i> <sub>907</sub>  | Si(4)...H(13)     | 473.4(38)  | 56.8(fixed)                             | —        | -3.1  | 56.8  |
| <i>u</i> <sub>763</sub>  | H(65)...H(85)     | 474.3(70)  | 59.0(fixed)                             | —        | 8.4   | 59.0  |
| <i>u</i> <sub>858</sub>  | H(134)...H(168)   | 474.3(33)  | 36.2(fixed)                             | —        | -4.9  | 36.2  |
| <i>u</i> <sub>696</sub>  | H(66)...H(86)     | 474.3(76)  | 79.9(fixed)                             | —        | 6.8   | 79.9  |
| <i>u</i> <sub>1015</sub> | C(119)...H(140)   | 474.7(54)  | 71.3(fixed)                             | —        | -0.9  | 71.3  |
| <i>u</i> <sub>779</sub>  | H(128)...H(156)   | 475.0(231) | 73.9(fixed)                             | —        | 8.7   | 73.9  |
| <i>u</i> <sub>844</sub>  | H(12)...H(29)     | 476.2(78)  | 119.9(fixed)                            | —        | 35.9  | 119.9 |
| <i>u</i> <sub>897</sub>  | Si(3)...Si(5)     | 476.3(41)  | 31.6(17)                                | 23.6(24) | 0.9   | 23.6  |
| <i>u</i> <sub>843</sub>  | Si(113)...C(139)  | 476.8(34)  | 48.8(tied to <i>u</i> <sub>897</sub> )  | —        | 0.6   | 36.5  |
| <i>u</i> <sub>981</sub>  | H(86)...H(112)    | 476.9(29)  | 27.4(fixed)                             | —        | -3.7  | 27.4  |
| <i>u</i> <sub>1057</sub> | H(121)...C(139)   | 477.1(58)  | 67.3(fixed)                             | —        | -1.9  | 67.3  |
| <i>u</i> <sub>505</sub>  | C(63)...H(101)    | 477.1(170) | 85.5(fixed)                             | —        | 16.9  | 85.5  |
| <i>u</i> <sub>901</sub>  | H(32)...H(55)     | 477.2(31)  | 38.0(fixed)                             | —        | -6.4  | 38.0  |
| <i>u</i> <sub>1309</sub> | H(66)...H(81)     | 477.3(68)  | 54.7(fixed)                             | —        | -4.9  | 54.7  |
| <i>u</i> <sub>915</sub>  | Si(116)...H(126)  | 477.8(42)  | 45.9(fixed)                             | —        | -2.3  | 45.9  |
| <i>u</i> <sub>876</sub>  | Si(6)...H(10)     | 477.8(72)  | 59.6(fixed)                             | —        | 9.1   | 59.6  |
| <i>u</i> <sub>951</sub>  | Si(115)...Si(118) | 478.5(66)  | 33.0(tied to <i>u</i> <sub>1043</sub> ) | —        | 0.0   | 28.4  |
| <i>u</i> <sub>958</sub>  | H(122)...H(167)   | 478.7(90)  | 47.3(fixed)                             | —        | 1.8   | 47.3  |
| <i>u</i> <sub>919</sub>  | H(24)...H(30)     | 479.0(11)  | 19.0(fixed)                             | —        | -8.2  | 19.0  |

|                          |                 |            |                                        |   |       |      |
|--------------------------|-----------------|------------|----------------------------------------|---|-------|------|
| <i>u</i> <sub>1032</sub> | H(129)...H(160) | 479.3(91)  | 78.3(fixed)                            | — | 13.0  | 78.3 |
| <i>u</i> <sub>926</sub>  | H(136)...H(142) | 479.4(11)  | 16.3(fixed)                            | — | -7.5  | 16.3 |
| <i>u</i> <sub>932</sub>  | H(80)...H(86)   | 479.6(11)  | 16.3(fixed)                            | — | -7.7  | 16.3 |
| <i>u</i> <sub>931</sub>  | H(13)...H(17)   | 479.6(10)  | 16.4(fixed)                            | — | -7.6  | 16.4 |
| <i>u</i> <sub>887</sub>  | H(9)...C(35)    | 479.9(95)  | 67.9(fixed)                            | — | 9.6   | 67.9 |
| <i>u</i> <sub>1078</sub> | H(86)...H(111)  | 479.9(94)  | 52.8(fixed)                            | — | 2.4   | 52.8 |
| <i>u</i> <sub>939</sub>  | H(40)...C(47)   | 480.0(48)  | 59.5(fixed)                            | — | 22.2  | 59.5 |
| <i>u</i> <sub>935</sub>  | H(125)...H(129) | 480.0(10)  | 16.0(fixed)                            | — | -7.2  | 16.0 |
| <i>u</i> <sub>972</sub>  | H(41)...C(51)   | 480.3(62)  | 91.3(fixed)                            | — | -1.7  | 91.3 |
| <i>u</i> <sub>930</sub>  | H(69)...H(73)   | 480.9(10)  | 16.1(fixed)                            | — | -7.3  | 16.1 |
| <i>u</i> <sub>811</sub>  | Si(60)...H(89)  | 481.0(134) | 70.8(fixed)                            | — | 10.2  | 70.8 |
| <i>u</i> <sub>1062</sub> | C(131)...H(166) | 481.0(217) | 73.7(fixed)                            | — | 3.8   | 73.7 |
| <i>u</i> <sub>795</sub>  | C(119)...C(135) | 481.1(56)  | 54.3(fixed)                            | — | 2.0   | 54.3 |
| <i>u</i> <sub>1323</sub> | H(64)...H(80)   | 481.1(78)  | 54.3(fixed)                            | — | -6.3  | 54.3 |
| <i>u</i> <sub>974</sub>  | Si(3)...C(51)   | 481.3(74)  | 86.9(tied to <i>u</i> <sub>897</sub> ) | — | 18.8  | 64.9 |
| <i>u</i> <sub>1004</sub> | H(122)...H(140) | 481.4(67)  | 80.8(fixed)                            | — | 0.2   | 80.8 |
| <i>u</i> <sub>1060</sub> | Si(59)...H(97)  | 481.4(149) | 80.3(fixed)                            | — | -0.3  | 80.3 |
| <i>u</i> <sub>582</sub>  | C(87)...H(110)  | 481.7(72)  | 69.5(fixed)                            | — | 7.3   | 69.5 |
| <i>u</i> <sub>563</sub>  | C(139)...C(163) | 481.7(134) | 49.3(fixed)                            | — | 29.0  | 49.3 |
| <i>u</i> <sub>581</sub>  | C(63)...H(86)   | 481.8(72)  | 68.9(fixed)                            | — | 7.3   | 68.9 |
| <i>u</i> <sub>1258</sub> | C(71)...H(96)   | 481.9(256) | 93.1(fixed)                            | — | -4.4  | 93.1 |
| <i>u</i> <sub>928</sub>  | H(21)...H(29)   | 481.9(7)   | 19.0(fixed)                            | — | -8.2  | 19.0 |
| <i>u</i> <sub>822</sub>  | H(82)...H(112)  | 482.1(32)  | 29.8(fixed)                            | — | -4.8  | 29.8 |
| <i>u</i> <sub>941</sub>  | H(66)...H(112)  | 482.2(25)  | 27.2(fixed)                            | — | -3.3  | 27.2 |
| <i>u</i> <sub>912</sub>  | H(120)...H(168) | 482.2(23)  | 29.8(fixed)                            | — | -2.8  | 29.8 |
| <i>u</i> <sub>933</sub>  | H(8)...H(16)    | 482.3(7)   | 16.2(fixed)                            | — | -7.6  | 16.2 |
| <i>u</i> <sub>923</sub>  | H(10)...H(14)   | 482.8(7)   | 16.4(fixed)                            | — | -7.5  | 16.4 |
| <i>u</i> <sub>975</sub>  | H(29)...H(56)   | 482.8(22)  | 28.7(fixed)                            | — | -13.7 | 28.7 |
| <i>u</i> <sub>908</sub>  | H(68)...H(112)  | 482.9(26)  | 34.9(fixed)                            | — | -6.0  | 34.9 |
| <i>u</i> <sub>927</sub>  | H(133)...H(141) | 482.9(7)   | 16.3(fixed)                            | — | -7.4  | 16.3 |
| <i>u</i> <sub>938</sub>  | Si(60)...Si(62) | 483.0(54)  | 29.9(tied to <i>u</i> <sub>897</sub> ) | — | 2.2   | 22.4 |
| <i>u</i> <sub>936</sub>  | H(130)...H(168) | 483.1(31)  | 34.6(fixed)                            | — | -5.3  | 34.6 |
| <i>u</i> <sub>920</sub>  | H(132)...H(137) | 483.2(7)   | 16.6(fixed)                            | — | -8.0  | 16.6 |
| <i>u</i> <sub>934</sub>  | H(122)...H(126) | 483.3(7)   | 16.1(fixed)                            | — | -6.9  | 16.1 |
| <i>u</i> <sub>925</sub>  | H(66)...H(70)   | 483.5(7)   | 15.1(fixed)                            | — | -7.1  | 15.1 |
| <i>u</i> <sub>991</sub>  | Si(3)...H(37)   | 483.8(66)  | 69.9(fixed)                            | — | -0.7  | 69.9 |
| <i>u</i> <sub>929</sub>  | H(64)...H(72)   | 483.9(7)   | 15.1(fixed)                            | — | -7.0  | 15.1 |
| <i>u</i> <sub>760</sub>  | H(146)...H(160) | 483.9(77)  | 80.3(fixed)                            | — | -0.4  | 80.3 |
| <i>u</i> <sub>918</sub>  | H(20)...H(25)   | 484.1(7)   | 17.9(fixed)                            | — | -8.1  | 17.9 |
| <i>u</i> <sub>922</sub>  | H(77)...H(85)   | 484.1(7)   | 16.1(fixed)                            | — | -6.6  | 16.1 |
| <i>u</i> <sub>921</sub>  | H(76)...H(81)   | 484.5(7)   | 16.2(fixed)                            | — | -7.1  | 16.2 |
| <i>u</i> <sub>899</sub>  | H(26)...H(56)   | 484.5(32)  | 50.6(fixed)                            | — | -4.1  | 50.6 |
| <i>u</i> <sub>924</sub>  | H(120)...H(128) | 484.7(7)   | 16.2(fixed)                            | — | -6.8  | 16.2 |
| <i>u</i> <sub>942</sub>  | H(14)...H(56)   | 484.8(23)  | 30.0(fixed)                            | — | -3.8  | 30.0 |
| <i>u</i> <sub>977</sub>  | H(141)...H(168) | 484.8(24)  | 26.9(fixed)                            | — | -4.6  | 26.9 |
| <i>u</i> <sub>1142</sub> | H(78)...H(109)  | 485.2(98)  | 60.2(fixed)                            | — | 0.2   | 60.2 |



|                          |                  |            |                                         |   |       |       |
|--------------------------|------------------|------------|-----------------------------------------|---|-------|-------|
| <i>u</i> <sub>813</sub>  | H(120)...H(138)  | 486.9(70)  | 77.0(fixed)                             | — | 6.3   | 77.0  |
| <i>u</i> <sub>987</sub>  | C(11)...H(38)    | 487.7(106) | 75.5(fixed)                             | — | 4.2   | 75.5  |
| <i>u</i> <sub>477</sub>  | C(67)...H(85)    | 487.7(77)  | 60.8(fixed)                             | — | 11.7  | 60.8  |
| <i>u</i> <sub>787</sub>  | Si(57)...C(75)   | 488.7(31)  | 36.2(tied to <i>u</i> <sub>897</sub> )  | — | 0.5   | 27.0  |
| <i>u</i> <sub>1014</sub> | C(11)...H(37)    | 489.1(129) | 72.3(fixed)                             | — | -2.9  | 72.3  |
| <i>u</i> <sub>1259</sub> | H(121)...H(142)  | 489.2(80)  | 74.7(fixed)                             | — | -7.8  | 74.7  |
| <i>u</i> <sub>937</sub>  | C(7)...H(52)     | 489.2(123) | 73.0(fixed)                             | — | 31.8  | 73.0  |
| <i>u</i> <sub>982</sub>  | Si(60)...H(66)   | 489.3(36)  | 43.6(fixed)                             | — | -2.6  | 43.6  |
| <i>u</i> <sub>984</sub>  | H(10)...H(44)    | 489.7(145) | 159.2(fixed)                            | — | 3.0   | 159.2 |
| <i>u</i> <sub>978</sub>  | H(122)...H(168)  | 490.4(23)  | 26.3(fixed)                             | — | -3.8  | 26.3  |
| <i>u</i> <sub>965</sub>  | H(64)...H(112)   | 490.5(22)  | 25.5(fixed)                             | — | -4.0  | 25.5  |
| <i>u</i> <sub>961</sub>  | Si(116)...C(151) | 490.7(119) | 42.7(tied to <i>u</i> <sub>1043</sub> ) | — | 1.3   | 36.7  |
| <i>u</i> <sub>1176</sub> | H(120)...H(158)  | 491.1(97)  | 63.6(fixed)                             | — | 0.9   | 63.6  |
| <i>u</i> <sub>1099</sub> | Si(59)...C(95)   | 491.4(145) | 66.5(tied to <i>u</i> <sub>1043</sub> ) | — | -2.2  | 57.1  |
| <i>u</i> <sub>971</sub>  | C(39)...H(50)    | 491.6(50)  | 52.4(fixed)                             | — | 19.3  | 52.4  |
| <i>u</i> <sub>1006</sub> | C(119)...C(163)  | 491.7(162) | 132.5(tied to <i>u</i> <sub>897</sub> ) | — | 1.6   | 99.0  |
| <i>u</i> <sub>989</sub>  | H(78)...C(107)   | 491.8(107) | 50.7(fixed)                             | — | 6.6   | 50.7  |
| <i>u</i> <sub>894</sub>  | H(128)...C(155)  | 492.1(203) | 58.6(fixed)                             | — | 4.6   | 58.6  |
| <i>u</i> <sub>1275</sub> | H(64)...H(82)    | 492.4(71)  | 62.3(fixed)                             | — | -0.8  | 62.3  |
| <i>u</i> <sub>968</sub>  | Si(6)...C(7)     | 493.8(71)  | 56.1(tied to <i>u</i> <sub>897</sub> )  | — | 4.5   | 41.9  |
| <i>u</i> <sub>1106</sub> | H(8)...H(49)     | 493.9(93)  | 110.9(fixed)                            | — | 10.2  | 110.9 |
| <i>u</i> <sub>774</sub>  | H(122)...H(137)  | 494.2(77)  | 76.4(fixed)                             | — | 7.3   | 76.4  |
| <i>u</i> <sub>996</sub>  | C(39)...H(53)    | 494.3(69)  | 113.6(fixed)                            | — | 0.2   | 113.6 |
| <i>u</i> <sub>865</sub>  | H(8)...H(34)     | 495.1(161) | 64.7(fixed)                             | — | 9.4   | 64.7  |
| <i>u</i> <sub>773</sub>  | H(77)...C(107)   | 495.6(150) | 64.8(fixed)                             | — | 7.3   | 64.8  |
| <i>u</i> <sub>1109</sub> | Si(59)...H(82)   | 495.7(30)  | 32.7(fixed)                             | — | -6.3  | 32.7  |
| <i>u</i> <sub>948</sub>  | H(10)...C(35)    | 495.7(111) | 72.2(fixed)                             | — | 2.4   | 72.2  |
| <i>u</i> <sub>993</sub>  | Si(2)...H(37)    | 495.7(36)  | 48.3(fixed)                             | — | -2.7  | 48.3  |
| <i>u</i> <sub>953</sub>  | H(142)...H(168)  | 495.7(23)  | 31.6(fixed)                             | — | -4.0  | 31.6  |
| <i>u</i> <sub>777</sub>  | H(121)...H(137)  | 495.8(77)  | 75.9(fixed)                             | — | 14.7  | 75.9  |
| <i>u</i> <sub>888</sub>  | H(85)...H(112)   | 497.8(21)  | 28.2(fixed)                             | — | -0.7  | 28.2  |
| <i>u</i> <sub>994</sub>  | Si(3)...H(30)    | 498.1(41)  | 79.1(fixed)                             | — | -7.4  | 79.1  |
| <i>u</i> <sub>998</sub>  | C(127)...H(158)  | 498.1(209) | 56.1(fixed)                             | — | 3.7   | 56.1  |
| <i>u</i> <sub>983</sub>  | H(13)...H(56)    | 498.6(25)  | 26.0(fixed)                             | — | -4.6  | 26.0  |
| <i>u</i> <sub>976</sub>  | C(75)...H(108)   | 499.6(140) | 58.5(fixed)                             | — | 5.2   | 58.5  |
| <i>u</i> <sub>782</sub>  | Si(59)...H(86)   | 499.8(43)  | 53.1(fixed)                             | — | -0.6  | 53.1  |
| <i>u</i> <sub>898</sub>  | H(124)...C(135)  | 499.9(56)  | 43.4(fixed)                             | — | 4.3   | 43.4  |
| <i>u</i> <sub>1135</sub> | H(16)...H(21)    | 500.2(66)  | 109.5(fixed)                            | — | -10.0 | 109.5 |
| <i>u</i> <sub>1785</sub> | H(84)...H(109)   | 500.7(247) | 63.1(fixed)                             | — | -6.4  | 63.1  |
| <i>u</i> <sub>836</sub>  | H(124)...H(136)  | 500.8(78)  | 71.8(fixed)                             | — | 6.4   | 71.8  |
| <i>u</i> <sub>962</sub>  | C(123)...H(138)  | 502.1(55)  | 41.5(fixed)                             | — | 2.5   | 41.5  |
| <i>u</i> <sub>1009</sub> | Si(60)...H(111)  | 503.2(43)  | 19.4(fixed)                             | — | -3.5  | 19.4  |
| <i>u</i> <sub>947</sub>  | H(9)...C(51)     | 503.7(120) | 75.4(fixed)                             | — | 39.2  | 75.4  |
| <i>u</i> <sub>543</sub>  | C(139)...H(165)  | 504.1(150) | 79.1(fixed)                             | — | 27.5  | 79.1  |
| <i>u</i> <sub>960</sub>  | H(17)...H(54)    | 504.2(79)  | 137.1(fixed)                            | — | 56.3  | 137.1 |
| <i>u</i> <sub>973</sub>  | Si(5)...C(7)     | 504.7(76)  | 44.2(tied to <i>u</i> <sub>1043</sub> ) | — | 2.8   | 38.0  |

|                          |                  |            |                                         |          |       |       |
|--------------------------|------------------|------------|-----------------------------------------|----------|-------|-------|
| <i>u</i> <sub>649</sub>  | H(21)...H(44)    | 505.5(132) | 117.5(fixed)                            | —        | 90.2  | 117.5 |
| <i>u</i> <sub>1038</sub> | Si(113)...H(120) | 505.8(29)  | 35.4(fixed)                             | —        | -2.8  | 35.4  |
| <i>u</i> <sub>999</sub>  | H(122)...H(165)  | 506.1(185) | 110.2(fixed)                            | —        | 3.0   | 110.2 |
| <i>u</i> <sub>1101</sub> | H(13)...C(23)    | 506.3(63)  | 83.8(fixed)                             | —        | -6.6  | 83.8  |
| <i>u</i> <sub>1083</sub> | Si(116)...H(146) | 506.4(57)  | 56.6(fixed)                             | —        | -1.6  | 56.6  |
| <i>u</i> <sub>900</sub>  | Si(113)...H(141) | 508.1(42)  | 48.9(fixed)                             | —        | -0.5  | 48.9  |
| <i>u</i> <sub>1012</sub> | H(42)...H(50)    | 508.6(71)  | 74.9(fixed)                             | —        | 15.3  | 74.9  |
| <i>u</i> <sub>1292</sub> | H(85)...H(111)   | 508.6(97)  | 48.6(fixed)                             | —        | -2.4  | 48.6  |
| <i>u</i> <sub>1149</sub> | C(123)...C(139)  | 508.9(58)  | 50.2(tied to <i>u</i> <sub>1043</sub> ) | —        | -4.4  | 43.2  |
| <i>u</i> <sub>1045</sub> | Si(57)...H(65)   | 510.3(25)  | 39.5(fixed)                             | —        | -5.2  | 39.5  |
| <i>u</i> <sub>1403</sub> | C(63)...H(80)    | 511.3(64)  | 45.3(fixed)                             | —        | -8.9  | 45.3  |
| <i>u</i> <sub>1266</sub> | H(68)...H(82)    | 511.3(56)  | 59.6(fixed)                             | —        | -8.9  | 59.6  |
| <i>u</i> <sub>1053</sub> | Si(1)...H(28)    | 511.9(36)  | 63.5(fixed)                             | —        | -4.2  | 63.5  |
| <i>u</i> <sub>1282</sub> | H(124)...H(141)  | 512.2(78)  | 72.1(fixed)                             | —        | -1.1  | 72.1  |
| <i>u</i> <sub>1023</sub> | C(119)...H(167)  | 513.4(76)  | 34.9(fixed)                             | —        | -2.2  | 34.9  |
| <i>u</i> <sub>780</sub>  | Si(57)...H(77)   | 513.6(39)  | 41.0(fixed)                             | —        | 1.3   | 41.0  |
| <i>u</i> <sub>1094</sub> | Si(115)...H(158) | 513.8(99)  | 44.9(fixed)                             | —        | 1.4   | 44.9  |
| <i>u</i> <sub>1117</sub> | H(20)...H(34)    | 514.1(128) | 154.6(fixed)                            | —        | -14.5 | 154.6 |
| <i>u</i> <sub>997</sub>  | C(7)...H(38)     | 514.3(107) | 60.7(fixed)                             | —        | 4.2   | 60.7  |
| <i>u</i> <sub>1291</sub> | Si(60)...H(108)  | 515.6(85)  | 44.1(fixed)                             | —        | -0.6  | 44.1  |
| <i>u</i> <sub>1022</sub> | Si(113)...H(130) | 515.7(27)  | 28.9(fixed)                             | —        | -4.2  | 28.9  |
| <i>u</i> <sub>1031</sub> | Si(57)...H(74)   | 515.8(29)  | 31.7(fixed)                             | —        | -5.2  | 31.7  |
| <i>u</i> <sub>1897</sub> | H(70)...H(98)    | 516.0(126) | 53.2(fixed)                             | —        | -9.9  | 53.2  |
| <i>u</i> <sub>881</sub>  | C(19)...H(44)    | 516.1(128) | 109.6(fixed)                            | —        | 56.0  | 109.6 |
| <i>u</i> <sub>1072</sub> | H(129)...C(159)  | 516.1(104) | 59.3(fixed)                             | —        | 8.3   | 59.3  |
| <i>u</i> <sub>1042</sub> | H(120)...C(163)  | 516.2(135) | 106.5(fixed)                            | —        | 1.2   | 106.5 |
| <i>u</i> <sub>1013</sub> | Si(3)...H(55)    | 516.8(19)  | 17.6(fixed)                             | —        | -2.8  | 17.6  |
| <i>u</i> <sub>1050</sub> | H(126)...H(138)  | 516.8(68)  | 65.4(fixed)                             | —        | -3.1  | 65.4  |
| <i>u</i> <sub>1279</sub> | H(12)...H(24)    | 516.9(78)  | 118.1(fixed)                            | —        | -10.0 | 118.1 |
| <i>u</i> <sub>781</sub>  | C(67)...C(83)    | 517.5(58)  | 66.1(tied to <i>u</i> <sub>897</sub> )  | —        | 0.9   | 49.4  |
| <i>u</i> <sub>1137</sub> | H(12)...C(23)    | 518.0(58)  | 84.0(fixed)                             | —        | 4.0   | 84.0  |
| <i>u</i> <sub>1138</sub> | H(16)...C(19)    | 519.2(47)  | 70.2(fixed)                             | —        | -9.5  | 70.2  |
| <i>u</i> <sub>1166</sub> | Si(116)...H(156) | 519.3(138) | 65.3(fixed)                             | —        | 4.4   | 65.3  |
| <i>u</i> <sub>1051</sub> | C(131)...H(165)  | 519.4(161) | 86.2(fixed)                             | —        | 10.0  | 86.2  |
| <i>u</i> <sub>1228</sub> | C(107)...H(112)  | 520.2(84)  | 35.3(fixed)                             | —        | -3.2  | 35.3  |
| <i>u</i> <sub>1020</sub> | Si(116)...H(167) | 520.4(21)  | 17.4(fixed)                             | —        | -3.1  | 17.4  |
| <i>u</i> <sub>1134</sub> | Si(59)...Si(61)  | 520.6(84)  | 36.2(tied to <i>u</i> <sub>1043</sub> ) | —        | -5.1  | 31.1  |
| <i>u</i> <sub>956</sub>  | Si(116)...C(163) | 521.2(105) | 50.8(tied to <i>u</i> <sub>897</sub> )  | —        | 8.0   | 38.0  |
| <i>u</i> <sub>1168</sub> | H(17)...H(21)    | 522.2(71)  | 109.0(fixed)                            | —        | -1.4  | 109.0 |
| <i>u</i> <sub>1127</sub> | C(71)...H(81)    | 522.5(39)  | 51.4(fixed)                             | —        | 2.6   | 51.4  |
| <i>u</i> <sub>1122</sub> | H(130)...H(158)  | 523.4(240) | 72.1(fixed)                             | —        | 3.2   | 72.1  |
| <i>u</i> <sub>1043</sub> | Si(3)...Si(6)    | 523.6(44)  | 29.0(12)                                | 24.9(25) | -1.3  | 24.9  |
| <i>u</i> <sub>1194</sub> | H(125)...H(140)  | 523.8(74)  | 62.2(fixed)                             | —        | 1.5   | 62.2  |
| <i>u</i> <sub>1049</sub> | Si(116)...H(121) | 524.8(29)  | 37.1(fixed)                             | —        | -4.8  | 37.1  |
| <i>u</i> <sub>970</sub>  | Si(115)...H(166) | 525.0(142) | 88.8(fixed)                             | —        | 5.4   | 88.8  |
| <i>u</i> <sub>1039</sub> | Si(60)...H(68)   | 525.2(31)  | 30.0(fixed)                             | —        | -5.4  | 30.0  |

|                          |                   |            |                                         |   |       |       |
|--------------------------|-------------------|------------|-----------------------------------------|---|-------|-------|
| <i>u</i> <sub>1056</sub> | Si(3)...H(26)     | 526.0(29)  | 36.4(fixed)                             | — | 4.0   | 36.4  |
| <i>u</i> <sub>1314</sub> | H(126)...H(141)   | 526.6(73)  | 62.1(fixed)                             | — | -7.8  | 62.1  |
| <i>u</i> <sub>768</sub>  | H(69)...H(84)     | 527.7(72)  | 67.9(fixed)                             | — | 9.5   | 67.9  |
| <i>u</i> <sub>1085</sub> | C(39)...C(51)     | 528.1(49)  | 88.9(tied to <i>u</i> <sub>1043</sub> ) | — | -8.6  | 76.4  |
| <i>u</i> <sub>1035</sub> | Si(116)...Si(118) | 528.3(76)  | 25.7(tied to <i>u</i> <sub>1043</sub> ) | — | -0.2  | 22.1  |
| <i>u</i> <sub>1019</sub> | Si(115)...H(138)  | 529.2(31)  | 30.3(fixed)                             | — | -3.2  | 30.3  |
| <i>u</i> <sub>1071</sub> | H(65)...H(100)    | 529.7(261) | 90.6(fixed)                             | — | -1.6  | 90.6  |
| <i>u</i> <sub>943</sub>  | C(119)...H(136)   | 529.9(63)  | 67.7(fixed)                             | — | -4.5  | 67.7  |
| <i>u</i> <sub>1362</sub> | H(66)...H(97)     | 530.1(218) | 87.1(fixed)                             | — | 1.4   | 87.1  |
| <i>u</i> <sub>1079</sub> | Si(4)...H(18)     | 530.2(28)  | 29.6(fixed)                             | — | -6.2  | 29.6  |
| <i>u</i> <sub>1081</sub> | H(12)...H(38)     | 530.3(112) | 88.2(fixed)                             | — | 3.2   | 88.2  |
| <i>u</i> <sub>1151</sub> | Si(115)...H(140)  | 530.7(32)  | 42.0(fixed)                             | — | -5.9  | 42.0  |
| <i>u</i> <sub>1909</sub> | H(85)...H(109)    | 530.9(247) | 54.3(fixed)                             | — | -10.4 | 54.3  |
| <i>u</i> <sub>1145</sub> | H(70)...H(98)     | 531.0(129) | 91.9(fixed)                             | — | 15.7  | 91.9  |
| <i>u</i> <sub>890</sub>  | H(66)...H(102)    | 531.6(227) | 89.0(fixed)                             | — | 10.1  | 89.0  |
| <i>u</i> <sub>1024</sub> | H(121)...H(166)   | 531.7(231) | 123.9(fixed)                            | — | 7.6   | 123.9 |
| <i>u</i> <sub>995</sub>  | H(8)...C(31)      | 531.9(141) | 54.0(fixed)                             | — | 6.6   | 54.0  |
| <i>u</i> <sub>1307</sub> | H(13)...H(24)     | 533.0(70)  | 98.5(fixed)                             | — | -20.4 | 98.5  |
| <i>u</i> <sub>986</sub>  | H(122)...C(135)   | 533.1(59)  | 61.1(fixed)                             | — | -3.4  | 61.1  |
| <i>u</i> <sub>1010</sub> | Si(60)...H(90)    | 533.1(126) | 80.6(fixed)                             | — | 1.5   | 80.6  |
| <i>u</i> <sub>1011</sub> | Si(62)...H(64)    | 533.1(126) | 80.6(fixed)                             | — | 1.5   | 80.6  |
| <i>u</i> <sub>1089</sub> | Si(4)...H(12)     | 534.5(29)  | 42.6(fixed)                             | — | -6.5  | 42.6  |
| <i>u</i> <sub>1203</sub> | Si(116)...H(144)  | 534.6(78)  | 61.1(fixed)                             | — | -2.0  | 61.1  |
| <i>u</i> <sub>909</sub>  | Si(116)...H(165)  | 534.8(98)  | 60.5(fixed)                             | — | 9.2   | 60.5  |
| <i>u</i> <sub>1193</sub> | H(8)...C(47)      | 535.0(83)  | 74.0(fixed)                             | — | 0.8   | 74.0  |
| <i>u</i> <sub>1303</sub> | H(125)...H(142)   | 535.1(75)  | 53.0(fixed)                             | — | -4.4  | 53.0  |
| <i>u</i> <sub>1058</sub> | C(11)...H(28)     | 536.0(58)  | 85.4(fixed)                             | — | 7.1   | 85.4  |
| <i>u</i> <sub>1354</sub> | C(79)...H(110)    | 536.1(106) | 47.5(fixed)                             | — | 10.7  | 47.5  |
| <i>u</i> <sub>613</sub>  | H(141)...H(165)   | 536.3(183) | 104.6(fixed)                            | — | 15.2  | 104.6 |
| <i>u</i> <sub>1119</sub> | Si(3)...C(19)     | 537.6(15)  | 24.4(tied to <i>u</i> <sub>1043</sub> ) | — | -12.1 | 21.0  |
| <i>u</i> <sub>1001</sub> | H(66)...H(102)    | 537.9(226) | 78.6(fixed)                             | — | 13.2  | 78.6  |
| <i>u</i> <sub>1174</sub> | H(12)...H(37)     | 538.0(131) | 88.5(fixed)                             | — | -4.9  | 88.5  |
| <i>u</i> <sub>1475</sub> | H(65)...C(79)     | 538.2(55)  | 46.4(fixed)                             | — | -7.4  | 46.4  |
| <i>u</i> <sub>1215</sub> | C(131)...C(163)   | 538.6(179) | 78.4(tied to <i>u</i> <sub>1043</sub> ) | — | 1.9   | 67.4  |
| <i>u</i> <sub>265</sub>  | H(76)...H(100)    | 538.6(266) | 84.1(fixed)                             | — | 17.5  | 84.1  |
| <i>u</i> <sub>1404</sub> | H(66)...C(79)     | 538.6(54)  | 44.1(fixed)                             | — | -8.2  | 44.1  |
| <i>u</i> <sub>1264</sub> | H(134)...H(166)   | 538.7(235) | 82.2(fixed)                             | — | 3.8   | 82.2  |
| <i>u</i> <sub>1188</sub> | C(11)...H(26)     | 539.2(57)  | 75.8(fixed)                             | — | 0.8   | 75.8  |
| <i>u</i> <sub>1100</sub> | H(28)...H(56)     | 539.3(22)  | 20.8(fixed)                             | — | -11.7 | 20.8  |
| <i>u</i> <sub>721</sub>  | H(70)...H(85)     | 540.0(78)  | 76.0(fixed)                             | — | 3.0   | 76.0  |
| <i>u</i> <sub>1118</sub> | Si(1)...C(23)     | 540.1(15)  | 20.3(tied to <i>u</i> <sub>1043</sub> ) | — | -14.0 | 17.5  |
| <i>u</i> <sub>1037</sub> | Si(1)...H(22)     | 540.5(35)  | 39.0(fixed)                             | — | 1.9   | 39.0  |
| <i>u</i> <sub>1018</sub> | Si(60)...C(87)    | 540.6(118) | 71.0(tied to <i>u</i> <sub>1043</sub> ) | — | 1.1   | 61.0  |
| <i>u</i> <sub>1005</sub> | Si(59)...H(100)   | 540.8(145) | 62.4(fixed)                             | — | 1.3   | 62.4  |
| <i>u</i> <sub>1252</sub> | H(72)...H(80)     | 540.8(54)  | 67.2(fixed)                             | — | 2.8   | 67.2  |
| <i>u</i> <sub>1074</sub> | H(12)...C(27)     | 541.1(63)  | 98.9(fixed)                             | — | 4.6   | 98.9  |

|                          |                  |            |                             |   |       |       |
|--------------------------|------------------|------------|-----------------------------|---|-------|-------|
| <i>u</i> <sub>750</sub>  | H(69)...H(86)    | 541.4(72)  | 75.5(fixed)                 | — | 4.1   | 75.5  |
| <i>u</i> <sub>1132</sub> | C(7)...H(44)     | 541.7(123) | 143.5(fixed)                | — | -6.7  | 143.5 |
| <i>u</i> <sub>1130</sub> | H(78)...H(108)   | 541.9(140) | 66.3(fixed)                 | — | 3.5   | 66.3  |
| <i>u</i> <sub>1088</sub> | Si(116)...H(124) | 542.4(31)  | 28.6(fixed)                 | — | -5.2  | 28.6  |
| <i>u</i> <sub>1054</sub> | Si(116)...H(153) | 542.9(122) | 52.6(fixed)                 | — | -3.5  | 52.6  |
| <i>u</i> <sub>1121</sub> | C(23)...H(55)    | 543.0(28)  | 32.3(fixed)                 | — | -19.0 | 32.3  |
| <i>u</i> <sub>1450</sub> | H(70)...H(77)    | 543.0(68)  | 55.2(fixed)                 | — | -1.7  | 55.2  |
| <i>u</i> <sub>1076</sub> | H(84)...H(112)   | 543.2(23)  | 20.3(fixed)                 | — | -6.2  | 20.3  |
| <i>u</i> <sub>1115</sub> | H(132)...H(167)  | 543.4(51)  | 45.9(fixed)                 | — | 3.1   | 45.9  |
| <i>u</i> <sub>1087</sub> | C(67)...H(111)   | 543.6(22)  | 29.6(fixed)                 | — | -1.8  | 29.6  |
| <i>u</i> <sub>1103</sub> | H(140)...H(168)  | 543.7(21)  | 20.4(fixed)                 | — | -8.6  | 20.4  |
| <i>u</i> <sub>1204</sub> | H(41)...H(54)    | 543.8(58)  | 100.7(fixed)                | — | -19.2 | 100.7 |
| <i>u</i> <sub>1281</sub> | H(122)...C(159)  | 544.2(60)  | 60.1(fixed)                 | — | 2.0   | 60.1  |
| <i>u</i> <sub>1044</sub> | C(15)...H(54)    | 544.4(74)  | 106.0(fixed)                | — | 45.2  | 106.0 |
| <i>u</i> <sub>1261</sub> | C(15)...H(21)    | 544.5(54)  | 90.0(fixed)                 | — | -11.6 | 90.0  |
| <i>u</i> <sub>1173</sub> | Si(5)...H(45)    | 544.7(27)  | 47.4(fixed)                 | — | -12.7 | 47.4  |
| <i>u</i> <sub>834</sub>  | H(65)...H(101)   | 544.9(199) | 94.2(fixed)                 | — | 10.2  | 94.2  |
| <i>u</i> <sub>1112</sub> | Si(3)...H(38)    | 544.9(58)  | 49.3(fixed)                 | — | -0.8  | 49.3  |
| <i>u</i> <sub>1077</sub> | Si(1)...H(9)     | 545.3(22)  | 31.3(fixed)                 | — | -4.5  | 31.3  |
| <i>u</i> <sub>1095</sub> | H(12)...H(56)    | 545.7(21)  | 19.8(fixed)                 | — | -7.2  | 19.8  |
| <i>u</i> <sub>1092</sub> | H(121)...H(168)  | 545.8(21)  | 20.1(fixed)                 | — | -6.9  | 20.1  |
| <i>u</i> <sub>1201</sub> | C(19)...H(34)    | 545.8(111) | 113.5(fixed)                | — | -13.3 | 113.5 |
| <i>u</i> <sub>1169</sub> | Si(113)...H(134) | 545.9(32)  | 29.8(fixed)                 | — | -5.4  | 29.8  |
| <i>u</i> <sub>1170</sub> | H(69)...C(75)    | 546.3(43)  | 44.9(fixed)                 | — | 2.7   | 44.9  |
| <i>u</i> <sub>1098</sub> | H(13)...H(28)    | 546.3(68)  | 96.7(fixed)                 | — | 8.2   | 96.7  |
| <i>u</i> <sub>1131</sub> | H(41)...H(52)    | 546.5(64)  | 86.4(fixed)                 | — | 1.9   | 86.4  |
| <i>u</i> <sub>1146</sub> | C(123)...H(156)  | 546.6(113) | 54.9(fixed)                 | — | 20.5  | 54.9  |
| <i>u</i> <sub>1287</sub> | Si(57)...H(84)   | 546.6(32)  | 28.1(fixed)                 | — | -6.0  | 28.1  |
| <i>u</i> <sub>1082</sub> | H(9)...H(38)     | 546.6(116) | 73.1(fixed)                 | — | 5.0   | 73.1  |
| <i>u</i> <sub>1096</sub> | H(10)...C(43)    | 546.8(116) | 110.5(fixed)                | — | -3.9  | 110.5 |
| <i>u</i> <sub>1365</sub> | C(71)...H(80)    | 546.8(45)  | 54.1(fixed)                 | — | -4.0  | 54.1  |
| <i>u</i> <sub>1105</sub> | H(65)...H(112)   | 546.8(22)  | 18.5(fixed)                 | — | -6.7  | 18.5  |
| <i>u</i> <sub>1027</sub> | C(63)...H(84)    | 547.6(56)  | 47.1(fixed)                 | — | -3.3  | 47.1  |
| <i>u</i> <sub>1075</sub> | H(72)...H(81)    | 547.9(51)  | 64.2(fixed)                 | — | 6.1   | 64.2  |
| <i>u</i> <sub>1113</sub> | Si(60)...C(71)   | 547.9(12)  | 17.9(tied to <i>u</i> 1043) | — | -3.4  | 15.4  |
| <i>u</i> <sub>1136</sub> | Si(60)...H(65)   | 548.3(29)  | 31.9(fixed)                 | — | -5.1  | 31.9  |
| <i>u</i> <sub>1110</sub> | Si(57)...C(67)   | 548.4(11)  | 17.3(tied to <i>u</i> 1043) | — | -4.2  | 14.9  |
| <i>u</i> <sub>1605</sub> | C(67)...H(98)    | 548.4(146) | 57.8(fixed)                 | — | -3.8  | 57.8  |
| <i>u</i> <sub>1066</sub> | H(13)...H(55)    | 548.5(44)  | 45.2(fixed)                 | — | 4.3   | 45.2  |
| <i>u</i> <sub>1411</sub> | H(66)...H(98)    | 548.7(195) | 70.5(fixed)                 | — | -1.8  | 70.5  |
| <i>u</i> <sub>1129</sub> | Si(59)...C(75)   | 549.1(15)  | 17.5(tied to <i>u</i> 1043) | — | -3.0  | 15.0  |
| <i>u</i> <sub>990</sub>  | H(65)...C(83)    | 549.1(60)  | 50.6(fixed)                 | — | -0.6  | 50.6  |
| <i>u</i> <sub>1183</sub> | C(119)...H(164)  | 549.7(164) | 113.9(fixed)                | — | -1.5  | 113.9 |
| <i>u</i> <sub>1073</sub> | H(8)...H(55)     | 551.4(32)  | 42.8(fixed)                 | — | 2.8   | 42.8  |
| <i>u</i> <sub>1090</sub> | Si(113)...C(123) | 551.7(11)  | 21.1(tied to <i>u</i> 1043) | — | -3.4  | 18.1  |
| <i>u</i> <sub>895</sub>  | C(139)...H(164)  | 552.0(148) | 54.9(fixed)                 | — | 26.2  | 54.9  |

|                          |                  |            |                                         |   |       |       |
|--------------------------|------------------|------------|-----------------------------------------|---|-------|-------|
| <i>u</i> <sub>1128</sub> | Si(116)...C(127) | 552.0(12)  | 17.8(tied to <i>u</i> <sub>1043</sub> ) | — | -3.8  | 15.3  |
| <i>u</i> <sub>1007</sub> | Si(4)...H(44)    | 552.2(77)  | 69.6(fixed)                             | — | 28.6  | 69.6  |
| <i>u</i> <sub>1114</sub> | Si(115)...C(131) | 552.3(12)  | 20.5(tied to <i>u</i> <sub>1043</sub> ) | — | -4.7  | 17.6  |
| <i>u</i> <sub>1207</sub> | H(42)...H(53)    | 552.3(66)  | 111.2(fixed)                            | — | -14.2 | 111.2 |
| <i>u</i> <sub>1162</sub> | H(29)...H(36)    | 552.5(130) | 85.4(fixed)                             | — | 27.7  | 85.4  |
| <i>u</i> <sub>1394</sub> | H(133)...H(166)  | 552.6(210) | 71.9(fixed)                             | — | -7.0  | 71.9  |
| <i>u</i> <sub>1477</sub> | C(63)...H(82)    | 552.7(54)  | 47.2(fixed)                             | — | -7.8  | 47.2  |
| <i>u</i> <sub>1650</sub> | H(74)...H(96)    | 553.3(294) | 103.7(fixed)                            | — | -14.2 | 103.7 |
| <i>u</i> <sub>1301</sub> | C(67)...H(98)    | 553.4(147) | 76.7(fixed)                             | — | 5.7   | 76.7  |
| <i>u</i> <sub>1368</sub> | H(69)...H(77)    | 553.5(56)  | 48.5(fixed)                             | — | -0.5  | 48.5  |
| <i>u</i> <sub>1197</sub> | Si(113)...H(121) | 554.2(23)  | 33.1(fixed)                             | — | -4.8  | 33.1  |
| <i>u</i> <sub>1432</sub> | H(132)...H(164)  | 554.7(232) | 100.5(fixed)                            | — | 2.4   | 100.5 |
| <i>u</i> <sub>1348</sub> | H(121)...H(140)  | 555.5(60)  | 79.8(fixed)                             | — | -6.6  | 79.8  |
| <i>u</i> <sub>1286</sub> | H(14)...H(37)    | 556.5(140) | 72.9(fixed)                             | — | -13.3 | 72.9  |
| <i>u</i> <sub>1190</sub> | H(120)...C(131)  | 556.6(39)  | 49.6(fixed)                             | — | -2.1  | 49.6  |
| <i>u</i> <sub>1144</sub> | Si(4)...C(7)     | 556.6(11)  | 17.6(tied to <i>u</i> <sub>1043</sub> ) | — | -4.5  | 15.2  |
| <i>u</i> <sub>1143</sub> | Si(1)...C(15)    | 557.3(10)  | 18.1(tied to <i>u</i> <sub>1043</sub> ) | — | -3.5  | 15.6  |
| <i>u</i> <sub>1273</sub> | H(42)...C(43)    | 557.4(55)  | 76.0(fixed)                             | — | -9.5  | 76.0  |
| <i>u</i> <sub>1257</sub> | Si(59)...H(77)   | 557.6(27)  | 23.8(fixed)                             | — | -3.4  | 23.8  |
| <i>u</i> <sub>1157</sub> | Si(113)...C(135) | 557.6(14)  | 17.3(tied to <i>u</i> <sub>1043</sub> ) | — | -4.8  | 14.8  |
| <i>u</i> <sub>1047</sub> | C(119)...H(138)  | 557.8(56)  | 61.7(fixed)                             | — | -3.0  | 61.7  |
| <i>u</i> <sub>950</sub>  | H(70)...C(83)    | 558.5(60)  | 64.2(fixed)                             | — | -5.1  | 64.2  |
| <i>u</i> <sub>1324</sub> | Si(59)...H(89)   | 558.6(95)  | 54.6(fixed)                             | — | -2.0  | 54.6  |
| <i>u</i> <sub>1428</sub> | H(10)...H(49)    | 558.8(89)  | 134.6(fixed)                            | — | -17.1 | 134.6 |
| <i>u</i> <sub>1242</sub> | Si(1)...H(25)    | 558.9(24)  | 34.3(fixed)                             | — | -16.5 | 34.3  |
| <i>u</i> <sub>1116</sub> | Si(5)...H(10)    | 559.1(81)  | 54.5(fixed)                             | — | -3.8  | 54.5  |
| <i>u</i> <sub>1034</sub> | Si(59)...H(84)   | 559.1(33)  | 29.2(fixed)                             | — | -5.8  | 29.2  |
| <i>u</i> <sub>1123</sub> | Si(57)...C(79)   | 559.2(14)  | 18.8(tied to <i>u</i> <sub>1043</sub> ) | — | -2.7  | 16.1  |
| <i>u</i> <sub>1245</sub> | H(133)...H(167)  | 559.4(65)  | 49.2(fixed)                             | — | -0.6  | 49.2  |
| <i>u</i> <sub>1030</sub> | H(121)...C(135)  | 559.5(59)  | 61.0(fixed)                             | — | -1.0  | 61.0  |
| <i>u</i> <sub>1262</sub> | H(120)...H(164)  | 559.7(136) | 121.8(fixed)                            | — | -2.6  | 121.8 |
| <i>u</i> <sub>1236</sub> | H(12)...H(30)    | 560.1(78)  | 139.3(fixed)                            | — | -11.1 | 139.3 |
| <i>u</i> <sub>1172</sub> | H(9)...H(52)     | 560.7(141) | 79.0(fixed)                             | — | 23.6  | 79.0  |
| <i>u</i> <sub>1216</sub> | Si(116)...H(152) | 560.8(129) | 45.1(fixed)                             | — | -3.5  | 45.1  |
| <i>u</i> <sub>552</sub>  | H(66)...H(98)    | 560.8(196) | 84.8(fixed)                             | — | 14.2  | 84.8  |
| <i>u</i> <sub>1059</sub> | H(126)...H(167)  | 561.1(37)  | 50.6(fixed)                             | — | 0.7   | 50.6  |
| <i>u</i> <sub>1285</sub> | C(39)...C(43)    | 561.1(36)  | 62.9(tied to <i>u</i> <sub>1043</sub> ) | — | -13.8 | 54.1  |
| <i>u</i> <sub>770</sub>  | H(68)...H(85)    | 561.4(81)  | 67.6(fixed)                             | — | 8.8   | 67.6  |
| <i>u</i> <sub>1317</sub> | C(71)...C(79)    | 562.2(31)  | 40.2(tied to <i>u</i> <sub>1043</sub> ) | — | -3.9  | 34.5  |
| <i>u</i> <sub>1382</sub> | H(64)...H(102)   | 562.5(196) | 89.1(fixed)                             | — | -1.2  | 89.1  |
| <i>u</i> <sub>1091</sub> | C(123)...H(167)  | 562.8(39)  | 36.6(fixed)                             | — | -2.8  | 36.6  |
| <i>u</i> <sub>1249</sub> | C(127)...H(141)  | 563.0(39)  | 58.9(fixed)                             | — | 1.1   | 58.9  |
| <i>u</i> <sub>1080</sub> | Si(59)...Si(62)  | 563.3(64)  | 37.6(tied to <i>u</i> <sub>1043</sub> ) | — | -2.6  | 32.3  |
| <i>u</i> <sub>1443</sub> | C(15)...H(53)    | 563.5(85)  | 155.7(fixed)                            | — | -0.8  | 155.7 |
| <i>u</i> <sub>1366</sub> | H(70)...C(75)    | 563.6(53)  | 49.6(fixed)                             | — | -3.8  | 49.6  |
| <i>u</i> <sub>1167</sub> | Si(3)...H(28)    | 563.8(32)  | 51.0(fixed)                             | — | -3.2  | 51.0  |

|                          |                  |            |                                         |   |       |       |
|--------------------------|------------------|------------|-----------------------------------------|---|-------|-------|
| <i>u</i> <sub>1171</sub> | Si(60)...H(72)   | 564.0(21)  | 30.0(fixed)                             | — | -2.9  | 30.0  |
| <i>u</i> <sub>1235</sub> | H(40)...H(50)    | 564.1(55)  | 61.6(fixed)                             | — | 12.0  | 61.6  |
| <i>u</i> <sub>1124</sub> | Si(115)...C(163) | 565.1(113) | 77.3(tied to <i>u</i> <sub>1043</sub> ) | — | -2.7  | 66.4  |
| <i>u</i> <sub>1471</sub> | C(63)...H(98)    | 565.4(187) | 64.5(fixed)                             | — | -3.1  | 64.5  |
| <i>u</i> <sub>1251</sub> | Si(57)...H(81)   | 565.8(24)  | 29.3(fixed)                             | — | -3.7  | 29.3  |
| <i>u</i> <sub>1255</sub> | H(14)...C(19)    | 565.8(36)  | 59.9(fixed)                             | — | -13.3 | 59.9  |
| <i>u</i> <sub>1111</sub> | Si(3)...H(44)    | 566.1(79)  | 97.8(fixed)                             | — | 7.0   | 97.8  |
| <i>u</i> <sub>1120</sub> | Si(113)...H(126) | 566.2(19)  | 33.7(fixed)                             | — | -1.8  | 33.7  |
| <i>u</i> <sub>1180</sub> | H(66)...H(84)    | 566.5(64)  | 62.8(fixed)                             | — | -8.2  | 62.8  |
| <i>u</i> <sub>838</sub>  | H(140)...H(165)  | 566.9(154) | 84.7(fixed)                             | — | 27.7  | 84.7  |
| <i>u</i> <sub>1209</sub> | Si(1)...H(24)    | 567.1(17)  | 37.5(fixed)                             | — | -16.2 | 37.5  |
| <i>u</i> <sub>810</sub>  | H(21)...H(45)    | 567.3(144) | 116.3(fixed)                            | — | 80.5  | 116.3 |
| <i>u</i> <sub>1240</sub> | Si(5)...H(44)    | 567.6(14)  | 31.1(fixed)                             | — | -16.0 | 31.1  |
| <i>u</i> <sub>985</sub>  | H(64)...H(102)   | 567.7(197) | 100.7(fixed)                            | — | 7.8   | 100.7 |
| <i>u</i> <sub>1511</sub> | H(64)...H(110)   | 568.0(210) | 81.2(fixed)                             | — | 2.1   | 81.2  |
| <i>u</i> <sub>1375</sub> | H(133)...H(165)  | 568.2(175) | 92.6(fixed)                             | — | -3.4  | 92.6  |
| <i>u</i> <sub>1220</sub> | H(40)...H(53)    | 568.4(77)  | 122.6(fixed)                            | — | 0.8   | 122.6 |
| <i>u</i> <sub>1016</sub> | H(77)...H(108)   | 568.4(177) | 75.4(fixed)                             | — | 0.4   | 75.4  |
| <i>u</i> <sub>1430</sub> | C(123)...H(142)  | 568.9(61)  | 44.6(fixed)                             | — | -9.1  | 44.6  |
| <i>u</i> <sub>1140</sub> | C(127)...H(137)  | 568.9(38)  | 44.2(fixed)                             | — | 6.1   | 44.2  |
| <i>u</i> <sub>1069</sub> | H(129)...C(163)  | 569.3(169) | 59.2(fixed)                             | — | 4.6   | 59.2  |
| <i>u</i> <sub>1200</sub> | Si(2)...H(38)    | 569.3(26)  | 30.4(fixed)                             | — | -5.8  | 30.4  |
| <i>u</i> <sub>1491</sub> | H(66)...C(95)    | 569.5(183) | 66.3(fixed)                             | — | -3.8  | 66.3  |
| <i>u</i> <sub>1227</sub> | C(131)...H(167)  | 569.6(47)  | 28.3(fixed)                             | — | -2.3  | 28.3  |
| <i>u</i> <sub>1238</sub> | Si(113)...H(136) | 569.9(25)  | 30.4(fixed)                             | — | -4.9  | 30.4  |
| <i>u</i> <sub>1028</sub> | H(129)...H(166)  | 570.0(188) | 74.0(fixed)                             | — | 6.9   | 74.0  |
| <i>u</i> <sub>1386</sub> | H(126)...C(139)  | 570.1(57)  | 48.6(fixed)                             | — | -9.8  | 48.6  |
| <i>u</i> <sub>1372</sub> | H(96)...H(105)   | 570.1(43)  | 56.1(fixed)                             | — | 1.7   | 56.1  |
| <i>u</i> <sub>1448</sub> | H(122)...H(160)  | 570.8(82)  | 54.8(fixed)                             | — | -1.7  | 54.8  |
| <i>u</i> <sub>1163</sub> | C(15)...H(36)    | 571.1(66)  | 57.2(fixed)                             | — | 14.6  | 57.2  |
| <i>u</i> <sub>1509</sub> | C(63)...H(97)    | 571.2(200) | 81.2(fixed)                             | — | -4.8  | 81.2  |
| <i>u</i> <sub>1182</sub> | Si(4)...Si(6)    | 571.5(36)  | 33.8(tied to <i>u</i> <sub>1043</sub> ) | — | -4.0  | 29.0  |
| <i>u</i> <sub>546</sub>  | C(75)...H(100)   | 571.6(219) | 73.4(fixed)                             | — | 10.7  | 73.4  |
| <i>u</i> <sub>831</sub>  | C(63)...H(98)    | 572.1(188) | 77.3(fixed)                             | — | 6.9   | 77.3  |
| <i>u</i> <sub>1195</sub> | H(13)...H(54)    | 572.2(119) | 86.7(fixed)                             | — | 16.1  | 86.7  |
| <i>u</i> <sub>1150</sub> | Si(113)...H(140) | 572.2(32)  | 38.9(fixed)                             | — | -5.0  | 38.9  |
| <i>u</i> <sub>1505</sub> | H(82)...H(110)   | 572.2(117) | 52.8(fixed)                             | — | 12.7  | 52.8  |
| <i>u</i> <sub>1740</sub> | H(65)...H(80)    | 572.3(70)  | 51.7(fixed)                             | — | -12.8 | 51.7  |
| <i>u</i> <sub>1456</sub> | C(7)...H(49)     | 572.5(83)  | 109.6(fixed)                            | — | -8.5  | 109.6 |
| <i>u</i> <sub>1290</sub> | H(129)...H(162)  | 573.3(131) | 64.5(fixed)                             | — | 6.5   | 64.5  |
| <i>u</i> <sub>893</sub>  | Si(59)...H(101)  | 573.3(121) | 62.9(fixed)                             | — | 4.7   | 62.9  |
| <i>u</i> <sub>1374</sub> | C(127)...H(160)  | 573.3(85)  | 72.5(fixed)                             | — | 0.3   | 72.5  |
| <i>u</i> <sub>1306</sub> | H(29)...C(35)    | 573.7(110) | 87.9(fixed)                             | — | 16.8  | 87.9  |
| <i>u</i> <sub>1270</sub> | H(17)...C(51)    | 574.0(74)  | 124.2(fixed)                            | — | 15.9  | 124.2 |
| <i>u</i> <sub>1184</sub> | Si(1)...H(17)    | 574.1(21)  | 31.1(fixed)                             | — | -2.0  | 31.1  |
| <i>u</i> <sub>1267</sub> | H(72)...C(79)    | 574.6(42)  | 49.0(fixed)                             | — | -0.2  | 49.0  |

|                          |                  |            |                                          |   |       |       |
|--------------------------|------------------|------------|------------------------------------------|---|-------|-------|
| <i>u</i> <sub>1218</sub> | Si(116)...H(129) | 574.9(20)  | 28.7(fixed)                              | — | -3.3  | 28.7  |
| <i>u</i> <sub>1295</sub> | H(42)...C(51)    | 575.4(51)  | 77.9(fixed)                              | — | -17.0 | 77.9  |
| <i>u</i> <sub>1280</sub> | Si(3)...H(52)    | 575.5(79)  | 62.7(fixed)                              | — | 6.2   | 62.7  |
| <i>u</i> <sub>1191</sub> | Si(5)...H(9)     | 575.6(79)  | 46.1(fixed)                              | — | -0.6  | 46.1  |
| <i>u</i> <sub>1357</sub> | Si(116)...C(155) | 575.9(115) | 54.8(tied to <i>u</i> <sub>1181</sub> )  | — | -3.6  | 45.3  |
| <i>u</i> <sub>1156</sub> | Si(115)...H(133) | 576.1(17)  | 36.9(fixed)                              | — | -3.2  | 36.9  |
| <i>u</i> <sub>1253</sub> | H(120)...H(167)  | 576.2(67)  | 36.5(fixed)                              | — | -5.6  | 36.5  |
| <i>u</i> <sub>1205</sub> | Si(57)...H(70)   | 576.2(15)  | 27.6(fixed)                              | — | -4.3  | 27.6  |
| <i>u</i> <sub>905</sub>  | C(19)...H(45)    | 576.2(121) | 91.0(fixed)                              | — | 65.9  | 91.0  |
| <i>u</i> <sub>1486</sub> | C(91)...H(101)   | 576.3(52)  | 33.6(fixed)                              | — | -4.3  | 33.6  |
| <i>u</i> <sub>940</sub>  | H(65)...H(86)    | 576.4(76)  | 74.3(fixed)                              | — | 1.0   | 74.3  |
| <i>u</i> <sub>1328</sub> | H(25)...H(55)    | 576.9(35)  | 45.7(fixed)                              | — | -24.9 | 45.7  |
| <i>u</i> <sub>1208</sub> | H(128)...H(158)  | 576.9(217) | 62.8(fixed)                              | — | -5.0  | 62.8  |
| <i>u</i> <sub>1681</sub> | H(81)...H(110)   | 577.0(140) | 47.3(fixed)                              | — | 3.5   | 47.3  |
| <i>u</i> <sub>1232</sub> | H(14)...H(55)    | 577.1(46)  | 55.2(fixed)                              | — | -1.9  | 55.2  |
| <i>u</i> <sub>1206</sub> | C(11)...H(55)    | 577.1(36)  | 32.0(fixed)                              | — | -2.1  | 32.0  |
| <i>u</i> <sub>1153</sub> | H(142)...H(167)  | 577.7(47)  | 51.0(fixed)                              | — | 0.1   | 51.0  |
| <i>u</i> <sub>1408</sub> | H(122)...H(162)  | 577.7(68)  | 68.0(fixed)                              | — | 4.0   | 68.0  |
| <i>u</i> <sub>1247</sub> | H(24)...H(55)    | 578.2(29)  | 50.2(fixed)                              | — | -23.0 | 50.2  |
| <i>u</i> <sub>1198</sub> | C(31)...H(49)    | 578.3(35)  | 47.7(fixed)                              | — | 15.6  | 47.7  |
| <i>u</i> <sub>1339</sub> | C(67)...C(75)    | 578.8(38)  | 32.5(tied to <i>u</i> <sub>1181</sub> )  | — | -3.6  | 26.9  |
| <i>u</i> <sub>1225</sub> | Si(57)...H(69)   | 579.1(17)  | 25.8(fixed)                              | — | -4.6  | 25.8  |
| <i>u</i> <sub>1397</sub> | H(120)...H(132)  | 579.5(50)  | 53.2(fixed)                              | — | -4.6  | 53.2  |
| <i>u</i> <sub>1263</sub> | H(124)...H(156)  | 579.6(138) | 62.0(fixed)                              | — | 23.7  | 62.0  |
| <i>u</i> <sub>1097</sub> | H(125)...C(131)  | 579.7(42)  | 50.9(fixed)                              | — | 3.2   | 50.9  |
| <i>u</i> <sub>1021</sub> | C(19)...C(43)    | 579.7(111) | 89.5(tied to <i>u</i> <sub>1181</sub> )  | — | 45.7  | 74.0  |
| <i>u</i> <sub>1239</sub> | Si(60)...H(73)   | 579.8(18)  | 24.8(fixed)                              | — | -4.0  | 24.8  |
| <i>u</i> <sub>1165</sub> | C(7)...C(31)     | 580.3(122) | 47.8(tied to <i>u</i> <sub>1043</sub> )  | — | -0.2  | 41.0  |
| <i>u</i> <sub>1367</sub> | Si(4)...H(54)    | 580.6(55)  | 102.0(fixed)                             | — | -0.9  | 102.0 |
| <i>u</i> <sub>1231</sub> | Si(116)...H(128) | 580.7(17)  | 27.3(fixed)                              | — | -4.1  | 27.3  |
| <i>u</i> <sub>1294</sub> | C(7)...C(43)     | 580.7(102) | 115.3(tied to <i>u</i> <sub>1043</sub> ) | — | -11.5 | 99.1  |
| <i>u</i> <sub>1483</sub> | C(123)...H(157)  | 580.7(87)  | 63.2(fixed)                              | — | 5.5   | 63.2  |
| <i>u</i> <sub>1276</sub> | Si(115)...H(132) | 580.7(19)  | 27.4(fixed)                              | — | -6.1  | 27.4  |
| <i>u</i> <sub>1224</sub> | H(10)...H(38)    | 581.1(124) | 73.7(fixed)                              | — | -6.1  | 73.7  |
| <i>u</i> <sub>1364</sub> | H(41)...H(46)    | 581.4(49)  | 68.8(fixed)                              | — | -7.3  | 68.8  |
| <i>u</i> <sub>955</sub>  | C(67)...H(86)    | 581.6(58)  | 63.9(fixed)                              | — | -4.7  | 63.9  |
| <i>u</i> <sub>1464</sub> | H(66)...H(110)   | 581.7(181) | 71.3(fixed)                              | — | 2.3   | 71.3  |
| <i>u</i> <sub>1192</sub> | H(124)...H(138)  | 581.8(59)  | 48.9(fixed)                              | — | -2.7  | 48.9  |
| <i>u</i> <sub>1479</sub> | H(124)...C(139)  | 582.1(60)  | 51.5(fixed)                              | — | -8.0  | 51.5  |
| <i>u</i> <sub>1241</sub> | Si(4)...H(10)    | 582.3(16)  | 31.0(fixed)                              | — | -4.7  | 31.0  |
| <i>u</i> <sub>1246</sub> | Si(4)...H(8)     | 582.8(15)  | 26.6(fixed)                              | — | -4.8  | 26.6  |
| <i>u</i> <sub>1305</sub> | C(31)...H(48)    | 582.8(42)  | 60.8(fixed)                              | — | 5.6   | 60.8  |
| <i>u</i> <sub>1254</sub> | H(134)...H(165)  | 583.0(173) | 93.0(fixed)                              | — | 10.4  | 93.0  |
| <i>u</i> <sub>1155</sub> | H(8)...H(32)     | 583.8(156) | 65.1(fixed)                              | — | 6.2   | 65.1  |
| <i>u</i> <sub>1351</sub> | H(125)...H(156)  | 584.0(76)  | 54.7(fixed)                              | — | 18.4  | 54.7  |
| <i>u</i> <sub>1441</sub> | C(123)...H(140)  | 584.1(58)  | 50.8(fixed)                              | — | -7.7  | 50.8  |

|                          |                  |            |                                         |          |       |       |
|--------------------------|------------------|------------|-----------------------------------------|----------|-------|-------|
| <i>u</i> <sub>1271</sub> | Si(1)...H(16)    | 584.1(17)  | 28.1(fixed)                             | —        | -4.3  | 28.1  |
| <i>u</i> <sub>1289</sub> | H(69)...H(111)   | 584.2(30)  | 34.8(fixed)                             | —        | -4.7  | 34.8  |
| <i>u</i> <sub>1350</sub> | C(15)...H(30)    | 584.4(46)  | 86.0(fixed)                             | —        | -22.4 | 86.0  |
| <i>u</i> <sub>1299</sub> | H(121)...C(163)  | 584.6(181) | 107.3(fixed)                            | —        | -3.5  | 107.3 |
| <i>u</i> <sub>1244</sub> | H(129)...H(141)  | 584.9(45)  | 69.0(fixed)                             | —        | 5.0   | 69.0  |
| <i>u</i> <sub>1423</sub> | H(16)...H(20)    | 585.1(41)  | 64.5(fixed)                             | —        | -21.4 | 64.5  |
| <i>u</i> <sub>1641</sub> | H(66)...H(80)    | 585.2(57)  | 45.6(fixed)                             | —        | -11.4 | 45.6  |
| <i>u</i> <sub>1212</sub> | H(30)...C(35)    | 585.3(102) | 64.2(fixed)                             | —        | 21.9  | 64.2  |
| <i>u</i> <sub>952</sub>  | Si(60)...H(101)  | 586.0(110) | 56.0(fixed)                             | —        | 1.0   | 56.0  |
| <i>u</i> <sub>1278</sub> | H(121)...H(167)  | 586.1(83)  | 42.1(fixed)                             | —        | -5.0  | 42.1  |
| <i>u</i> <sub>1524</sub> | Si(59)...H(96)   | 586.1(154) | 59.8(fixed)                             | —        | -10.6 | 59.8  |
| <i>u</i> <sub>1102</sub> | Si(57)...H(78)   | 586.4(29)  | 28.3(fixed)                             | —        | -4.4  | 28.3  |
| <i>u</i> <sub>1410</sub> | H(73)...H(81)    | 586.6(33)  | 51.5(fixed)                             | —        | -3.8  | 51.5  |
| <i>u</i> <sub>1226</sub> | C(7)...H(55)     | 587.3(26)  | 27.0(fixed)                             | —        | -3.0  | 27.0  |
| <i>u</i> <sub>1256</sub> | Si(113)...H(137) | 587.4(16)  | 29.5(fixed)                             | —        | -4.9  | 29.5  |
| <i>u</i> <sub>1133</sub> | H(122)...H(136)  | 587.5(57)  | 66.8(fixed)                             | —        | -10.4 | 66.8  |
| <i>u</i> <sub>1248</sub> | Si(113)...H(125) | 587.6(14)  | 28.2(fixed)                             | —        | -4.9  | 28.2  |
| <i>u</i> <sub>1222</sub> | H(70)...H(111)   | 587.8(30)  | 35.7(fixed)                             | —        | -3.1  | 35.7  |
| <i>u</i> <sub>1415</sub> | H(10)...C(47)    | 588.0(74)  | 90.7(fixed)                             | —        | -16.0 | 90.7  |
| <i>u</i> <sub>1234</sub> | H(8)...H(41)     | 588.0(47)  | 68.1(fixed)                             | —        | 16.4  | 68.1  |
| <i>u</i> <sub>1250</sub> | C(119)...H(165)  | 588.1(158) | 100.8(fixed)                            | —        | -5.8  | 100.8 |
| <i>u</i> <sub>1217</sub> | H(8)...C(39)     | 589.5(65)  | 57.4(fixed)                             | —        | 11.9  | 57.4  |
| <i>u</i> <sub>1152</sub> | Si(60)...H(98)   | 589.8(70)  | 50.8(fixed)                             | —        | 3.4   | 50.8  |
| <i>u</i> <sub>1296</sub> | Si(6)...H(9)     | 590.1(77)  | 47.9(fixed)                             | —        | -3.5  | 47.9  |
| <i>u</i> <sub>1268</sub> | H(120)...H(165)  | 590.2(150) | 113.1(fixed)                            | —        | -5.9  | 113.1 |
| <i>u</i> <sub>1347</sub> | H(69)...H(78)    | 590.4(48)  | 50.6(fixed)                             | —        | 3.4   | 50.6  |
| <i>u</i> <sub>1026</sub> | C(67)...H(84)    | 590.4(58)  | 54.5(fixed)                             | —        | -3.9  | 54.5  |
| <i>u</i> <sub>1139</sub> | Si(57)...H(80)   | 590.8(17)  | 30.1(fixed)                             | —        | -0.7  | 30.1  |
| <i>u</i> <sub>1402</sub> | H(129)...H(161)  | 591.6(85)  | 59.0(fixed)                             | —        | 1.0   | 59.0  |
| <i>u</i> <sub>1311</sub> | H(128)...H(137)  | 591.7(43)  | 46.5(fixed)                             | —        | 2.4   | 46.5  |
| <i>u</i> <sub>861</sub>  | Si(60)...H(98)   | 592.1(70)  | 40.3(fixed)                             | —        | 4.1   | 40.3  |
| <i>u</i> <sub>1086</sub> | H(73)...H(101)   | 592.5(179) | 76.8(fixed)                             | —        | 5.2   | 76.8  |
| <i>u</i> <sub>1210</sub> | Si(59)...H(76)   | 592.9(14)  | 28.6(fixed)                             | —        | -2.6  | 28.6  |
| <i>u</i> <sub>1084</sub> | H(76)...H(111)   | 593.0(50)  | 44.5(fixed)                             | —        | -0.3  | 44.5  |
| <i>u</i> <sub>1459</sub> | H(21)...H(54)    | 593.5(115) | 150.9(fixed)                            | —        | 5.7   | 150.9 |
| <i>u</i> <sub>1455</sub> | H(13)...H(26)    | 594.0(64)  | 85.2(fixed)                             | —        | -10.0 | 85.2  |
| <i>u</i> <sub>1344</sub> | H(76)...H(105)   | 595.3(72)  | 50.3(fixed)                             | —        | 6.6   | 50.3  |
| <i>u</i> <sub>471</sub>  | H(92)...H(102)   | 595.6(48)  | 62.9(fixed)                             | —        | 11.1  | 62.9  |
| <i>u</i> <sub>1494</sub> | H(8)...H(48)     | 596.0(73)  | 76.1(fixed)                             | —        | -16.0 | 76.1  |
| <i>u</i> <sub>1490</sub> | H(20)...H(54)    | 596.4(106) | 127.8(fixed)                            | —        | -7.1  | 127.8 |
| <i>u</i> <sub>1363</sub> | C(119)...C(131)  | 596.4(32)  | 39.4(tied to <i>u</i> <sub>1181</sub> ) | —        | -6.7  | 32.6  |
| <i>u</i> <sub>1298</sub> | Si(115)...H(154) | 596.6(53)  | 43.5(fixed)                             | —        | 4.9   | 43.5  |
| <i>u</i> <sub>1516</sub> | H(122)...H(132)  | 597.4(60)  | 57.5(fixed)                             | —        | -5.2  | 57.5  |
| <i>u</i> <sub>1284</sub> | H(10)...H(46)    | 597.6(129) | 108.8(fixed)                            | —        | 0.8   | 108.8 |
| <i>u</i> <sub>1063</sub> | H(125)...H(133)  | 598.0(51)  | 70.2(fixed)                             | —        | 6.7   | 70.2  |
| <i>u</i> <sub>1181</sub> | Si(4)...C(43)    | 598.1(67)  | 59.7(39)                                | 49.3(49) | 12.7  | 49.3  |



|                          |                   |            |                                          |   |       |       |
|--------------------------|-------------------|------------|------------------------------------------|---|-------|-------|
| <i>u</i> <sub>1332</sub> | C(27)...H(36)     | 598.1(112) | 64.4(fixed)                              | — | 12.6  | 64.4  |
| <i>u</i> <sub>1421</sub> | H(128)...H(160)   | 598.2(107) | 94.8(fixed)                              | — | -0.6  | 94.8  |
| <i>u</i> <sub>1542</sub> | H(133)...C(163)   | 598.4(177) | 70.7(fixed)                              | — | -9.4  | 70.7  |
| <i>u</i> <sub>1400</sub> | H(80)...H(110)    | 598.4(82)  | 59.9(fixed)                              | — | 11.1  | 59.9  |
| <i>u</i> <sub>1426</sub> | H(122)...C(131)   | 598.6(45)  | 48.4(fixed)                              | — | -7.2  | 48.4  |
| <i>u</i> <sub>1327</sub> | H(68)...H(111)    | 599.2(26)  | 37.7(fixed)                              | — | -2.3  | 37.7  |
| <i>u</i> <sub>1387</sub> | C(15)...C(51)     | 599.9(67)  | 107.2(tied to <i>u</i> <sub>1181</sub> ) | — | 10.9  | 98.0  |
| <i>u</i> <sub>1310</sub> | H(33)...H(48)     | 599.9(47)  | 66.5(fixed)                              | — | 14.2  | 66.5  |
| <i>u</i> <sub>1147</sub> | Si(4)...H(45)     | 599.9(77)  | 77.5(fixed)                              | — | 16.6  | 77.5  |
| <i>u</i> <sub>1460</sub> | H(8)...H(50)      | 600.0(97)  | 75.8(fixed)                              | — | 0.8   | 75.8  |
| <i>u</i> <sub>1388</sub> | C(27)...C(39)     | 600.1(67)  | 106.5(tied to <i>u</i> <sub>1181</sub> ) | — | 10.9  | 97.4  |
| <i>u</i> <sub>1612</sub> | C(63)...C(95)     | 600.1(172) | 68.7(tied to <i>u</i> <sub>1181</sub> )  | — | -8.3  | 56.7  |
| <i>u</i> <sub>1594</sub> | Si(59)...H(110)   | 600.3(91)  | 40.0(fixed)                              | — | -1.9  | 40.0  |
| <i>u</i> <sub>1179</sub> | H(64)...C(75)     | 600.5(37)  | 47.4(fixed)                              | — | 2.8   | 47.4  |
| <i>u</i> <sub>1068</sub> | C(63)...H(102)    | 600.6(202) | 83.3(fixed)                              | — | 2.2   | 83.3  |
| <i>u</i> <sub>1322</sub> | Si(115)...Si(117) | 600.7(17)  | 19.9(tied to <i>u</i> <sub>1181</sub> )  | — | -2.5  | 16.5  |
| <i>u</i> <sub>1336</sub> | C(7)...C(23)      | 600.8(28)  | 34.6(tied to <i>u</i> <sub>1181</sub> )  | — | 4.0   | 31.6  |
| <i>u</i> <sub>1395</sub> | H(14)...H(20)     | 601.1(39)  | 75.8(fixed)                              | — | -18.1 | 75.8  |
| <i>u</i> <sub>1492</sub> | C(7)...C(47)      | 602.1(71)  | 82.0(tied to <i>u</i> <sub>1181</sub> )  | — | -12.5 | 67.8  |
| <i>u</i> <sub>1703</sub> | H(132)...H(156)   | 602.4(200) | 79.0(fixed)                              | — | -7.5  | 79.0  |
| <i>u</i> <sub>1497</sub> | Si(59)...C(87)    | 602.4(86)  | 46.8(tied to <i>u</i> <sub>1181</sub> )  | — | -8.2  | 38.7  |
| <i>u</i> <sub>1319</sub> | C(63)...H(102)    | 602.5(201) | 71.0(fixed)                              | — | 0.9   | 71.0  |
| <i>u</i> <sub>1187</sub> | H(20)...H(46)     | 602.7(136) | 117.3(fixed)                             | — | 41.3  | 117.3 |
| <i>u</i> <sub>1449</sub> | C(127)...C(159)   | 602.7(92)  | 60.1(tied to <i>u</i> <sub>1181</sub> )  | — | -4.2  | 49.6  |
| <i>u</i> <sub>1489</sub> | H(12)...H(26)     | 603.8(59)  | 84.1(fixed)                              | — | -1.1  | 84.1  |
| <i>u</i> <sub>1272</sub> | H(18)...H(36)     | 604.0(72)  | 63.0(fixed)                              | — | 18.3  | 63.0  |
| <i>u</i> <sub>1444</sub> | H(8)...H(46)      | 604.1(127) | 115.8(fixed)                             | — | -11.1 | 115.8 |
| <i>u</i> <sub>1288</sub> | C(127)...C(135)   | 604.1(30)  | 30.7(tied to <i>u</i> <sub>1043</sub> )  | — | -1.5  | 26.4  |
| <i>u</i> <sub>1293</sub> | H(10)...H(55)     | 604.2(33)  | 45.3(fixed)                              | — | -3.7  | 45.3  |
| <i>u</i> <sub>818</sub>  | H(66)...H(104)    | 604.3(87)  | 85.5(fixed)                              | — | 25.1  | 85.5  |
| <i>u</i> <sub>1420</sub> | C(127)...C(139)   | 604.4(33)  | 46.2(tied to <i>u</i> <sub>1181</sub> )  | — | -4.7  | 38.2  |
| <i>u</i> <sub>1895</sub> | H(68)...H(98)     | 604.7(182) | 69.8(fixed)                              | — | -6.8  | 69.8  |
| <i>u</i> <sub>1353</sub> | H(26)...H(55)     | 604.7(33)  | 39.4(fixed)                              | — | -18.8 | 39.4  |
| <i>u</i> <sub>1356</sub> | H(16)...H(54)     | 604.8(68)  | 112.8(fixed)                             | — | 25.4  | 112.8 |
| <i>u</i> <sub>1699</sub> | H(74)...H(80)     | 604.9(52)  | 59.1(fixed)                              | — | -9.0  | 59.1  |
| <i>u</i> <sub>1468</sub> | H(14)...H(21)     | 605.3(38)  | 59.6(fixed)                              | — | -21.6 | 59.6  |
| <i>u</i> <sub>1148</sub> | H(121)...H(136)   | 605.4(69)  | 76.5(fixed)                              | — | -7.1  | 76.5  |
| <i>u</i> <sub>1269</sub> | C(139)...H(167)   | 605.6(36)  | 31.2(fixed)                              | — | -4.5  | 31.2  |
| <i>u</i> <sub>1297</sub> | C(7)...H(29)      | 605.6(43)  | 62.8(fixed)                              | — | 6.9   | 62.8  |
| <i>u</i> <sub>1029</sub> | H(68)...C(83)     | 605.9(60)  | 55.8(fixed)                              | — | -3.6  | 55.8  |
| <i>u</i> <sub>1333</sub> | Si(3)...C(43)     | 606.0(62)  | 81.3(tied to <i>u</i> <sub>1181</sub> )  | — | -5.2  | 67.2  |
| <i>u</i> <sub>1277</sub> | C(127)...H(136)   | 606.1(44)  | 51.7(fixed)                              | — | -0.4  | 51.7  |
| <i>u</i> <sub>1412</sub> | C(11)...C(19)     | 606.3(26)  | 48.8(tied to <i>u</i> <sub>1181</sub> )  | — | -18.6 | 40.4  |
| <i>u</i> <sub>1229</sub> | H(122)...H(138)   | 606.8(61)  | 70.0(fixed)                              | — | -8.1  | 70.0  |
| <i>u</i> <sub>1609</sub> | H(68)...H(98)     | 607.2(183) | 88.0(fixed)                              | — | 0.3   | 88.0  |
| <i>u</i> <sub>1631</sub> | C(63)...H(110)    | 607.2(174) | 61.2(fixed)                              | — | -1.7  | 61.2  |

|                          |                  |            |                                         |   |       |       |
|--------------------------|------------------|------------|-----------------------------------------|---|-------|-------|
| <i>u</i> <sub>1391</sub> | H(66)...C(107)   | 607.2(161) | 69.8(fixed)                             | — | 3.5   | 69.8  |
| <i>u</i> <sub>1329</sub> | H(128)...H(136)  | 607.2(50)  | 58.8(fixed)                             | — | 3.1   | 58.8  |
| <i>u</i> <sub>1370</sub> | Si(4)...H(36)    | 607.2(70)  | 50.5(fixed)                             | — | 1.5   | 50.5  |
| <i>u</i> <sub>1466</sub> | H(134)...C(163)  | 607.3(193) | 75.6(fixed)                             | — | 1.1   | 75.6  |
| <i>u</i> <sub>1472</sub> | C(123)...C(155)  | 607.4(90)  | 45.9(tied to <i>u</i> <sub>1181</sub> ) | — | 5.7   | 38.0  |
| <i>u</i> <sub>1553</sub> | H(81)...H(111)   | 607.5(53)  | 36.6(fixed)                             | — | -4.6  | 36.6  |
| <i>u</i> <sub>1125</sub> | Si(60)...H(102)  | 607.8(99)  | 45.5(fixed)                             | — | 0.0   | 45.5  |
| <i>u</i> <sub>1379</sub> | H(120)...H(134)  | 607.9(44)  | 57.7(fixed)                             | — | -2.1  | 57.7  |
| <i>u</i> <sub>1390</sub> | C(39)...H(52)    | 608.0(50)  | 71.5(fixed)                             | — | -8.2  | 71.5  |
| <i>u</i> <sub>1614</sub> | H(124)...H(157)  | 608.4(96)  | 67.6(fixed)                             | — | 8.1   | 67.6  |
| <i>u</i> <sub>1583</sub> | Si(60)...H(102)  | 608.7(99)  | 22.9(fixed)                             | — | -1.6  | 22.9  |
| <i>u</i> <sub>1265</sub> | H(8)...H(33)     | 609.6(127) | 54.9(fixed)                             | — | -1.7  | 54.9  |
| <i>u</i> <sub>1520</sub> | H(42)...H(44)    | 609.7(51)  | 79.3(fixed)                             | — | -20.3 | 79.3  |
| <i>u</i> <sub>1500</sub> | H(130)...H(141)  | 611.4(47)  | 67.8(fixed)                             | — | -0.7  | 67.8  |
| <i>u</i> <sub>1161</sub> | C(71)...H(85)    | 611.5(42)  | 40.8(fixed)                             | — | 2.0   | 40.8  |
| <i>u</i> <sub>1211</sub> | C(75)...H(111)   | 612.5(39)  | 27.8(fixed)                             | — | -4.2  | 27.8  |
| <i>u</i> <sub>1458</sub> | H(129)...H(142)  | 612.7(54)  | 60.3(fixed)                             | — | 0.5   | 60.3  |
| <i>u</i> <sub>1274</sub> | Si(116)...H(164) | 613.1(115) | 42.9(fixed)                             | — | 2.5   | 42.9  |
| <i>u</i> <sub>1243</sub> | H(18)...H(54)    | 613.2(86)  | 100.3(fixed)                            | — | 48.2  | 100.3 |
| <i>u</i> <sub>1529</sub> | C(119)...H(132)  | 613.5(44)  | 39.3(fixed)                             | — | -7.5  | 39.3  |
| <i>u</i> <sub>1495</sub> | H(121)...H(164)  | 613.6(199) | 126.7(fixed)                            | — | -6.3  | 126.7 |
| <i>u</i> <sub>1202</sub> | C(127)...H(166)  | 613.7(173) | 76.4(fixed)                             | — | -0.1  | 76.4  |
| <i>u</i> <sub>1331</sub> | H(10)...H(25)    | 613.8(41)  | 57.7(fixed)                             | — | 11.3  | 57.7  |
| <i>u</i> <sub>1380</sub> | H(126)...H(156)  | 613.9(126) | 58.0(fixed)                             | — | 14.7  | 58.0  |
| <i>u</i> <sub>1582</sub> | Si(116)...H(157) | 614.1(106) | 54.6(fixed)                             | — | -9.7  | 54.6  |
| <i>u</i> <sub>1436</sub> | H(40)...C(51)    | 614.4(54)  | 84.3(fixed)                             | — | -12.2 | 84.3  |
| <i>u</i> <sub>1811</sub> | H(65)...H(82)    | 615.4(57)  | 54.8(fixed)                             | — | -11.6 | 54.8  |
| <i>u</i> <sub>1513</sub> | C(127)...H(142)  | 615.7(46)  | 48.5(fixed)                             | — | -5.5  | 48.5  |
| <i>u</i> <sub>1563</sub> | H(122)...H(161)  | 615.7(64)  | 69.7(fixed)                             | — | -3.1  | 69.7  |
| <i>u</i> <sub>1283</sub> | C(123)...C(131)  | 615.7(33)  | 44.1(tied to <i>u</i> <sub>1043</sub> ) | — | -3.9  | 37.9  |
| <i>u</i> <sub>1587</sub> | H(73)...H(80)    | 616.3(40)  | 55.7(fixed)                             | — | -7.1  | 55.7  |
| <i>u</i> <sub>1422</sub> | C(27)...C(35)    | 616.4(95)  | 59.2(tied to <i>u</i> <sub>1181</sub> ) | — | 9.1   | 48.9  |
| <i>u</i> <sub>1514</sub> | H(21)...H(34)    | 616.5(92)  | 106.9(fixed)                            | — | -26.7 | 106.9 |
| <i>u</i> <sub>1107</sub> | H(140)...H(164)  | 616.6(176) | 61.9(fixed)                             | — | 25.4  | 61.9  |
| <i>u</i> <sub>1465</sub> | H(10)...H(45)    | 616.8(105) | 119.7(fixed)                            | — | -25.0 | 119.7 |
| <i>u</i> <sub>1531</sub> | C(15)...H(20)    | 617.1(30)  | 50.1(fixed)                             | — | -23.5 | 50.1  |
| <i>u</i> <sub>1342</sub> | H(8)...H(29)     | 617.2(48)  | 62.4(fixed)                             | — | 11.1  | 62.4  |
| <i>u</i> <sub>1558</sub> | H(64)...C(107)   | 617.7(182) | 80.0(fixed)                             | — | -1.7  | 80.0  |
| <i>u</i> <sub>1419</sub> | H(12)...H(28)    | 617.8(63)  | 95.9(fixed)                             | — | -1.3  | 95.9  |
| <i>u</i> <sub>1504</sub> | H(70)...C(95)    | 618.0(113) | 82.6(fixed)                             | — | 1.4   | 82.6  |
| <i>u</i> <sub>1377</sub> | H(120)...H(133)  | 618.2(33)  | 50.8(fixed)                             | — | -5.4  | 50.8  |
| <i>u</i> <sub>1565</sub> | C(19)...H(54)    | 618.5(96)  | 127.0(fixed)                            | — | -5.0  | 127.0 |
| <i>u</i> <sub>1196</sub> | H(128)...H(153)  | 619.5(189) | 70.1(fixed)                             | — | 17.0  | 70.1  |
| <i>u</i> <sub>1425</sub> | H(129)...C(139)  | 619.6(39)  | 50.0(fixed)                             | — | -1.1  | 50.0  |
| <i>u</i> <sub>1343</sub> | H(125)...H(167)  | 619.8(33)  | 40.4(fixed)                             | — | -6.8  | 40.4  |
| <i>u</i> <sub>1442</sub> | Si(1)...H(26)    | 620.3(17)  | 22.4(fixed)                             | — | -16.1 | 22.4  |

|                          |                 |            |                                         |   |       |       |
|--------------------------|-----------------|------------|-----------------------------------------|---|-------|-------|
| <i>u</i> <sub>1401</sub> | H(16)...H(36)   | 620.4(76)  | 61.7(fixed)                             | — | 10.1  | 61.7  |
| <i>u</i> <sub>1746</sub> | H(66)...H(82)   | 620.5(56)  | 50.7(fixed)                             | — | -12.4 | 50.7  |
| <i>u</i> <sub>1601</sub> | H(70)...H(78)   | 620.5(58)  | 56.9(fixed)                             | — | -5.7  | 56.9  |
| <i>u</i> <sub>1126</sub> | H(70)...H(86)   | 621.3(53)  | 69.0(fixed)                             | — | -11.6 | 69.0  |
| <i>u</i> <sub>1405</sub> | H(128)...C(135) | 621.7(36)  | 33.9(fixed)                             | — | -1.8  | 33.9  |
| <i>u</i> <sub>1804</sub> | H(65)...H(97)   | 621.9(234) | 92.8(fixed)                             | — | -6.9  | 92.8  |
| <i>u</i> <sub>1189</sub> | C(135)...H(166) | 622.2(116) | 62.6(fixed)                             | — | 11.3  | 62.6  |
| <i>u</i> <sub>1467</sub> | Si(3)...H(22)   | 622.2(15)  | 21.9(fixed)                             | — | -13.9 | 21.9  |
| <i>u</i> <sub>1308</sub> | H(141)...H(167) | 622.4(48)  | 45.3(fixed)                             | — | -4.0  | 45.3  |
| <i>u</i> <sub>1178</sub> | H(17)...H(44)   | 622.4(99)  | 119.9(fixed)                            | — | 34.4  | 119.9 |
| <i>u</i> <sub>1318</sub> | H(130)...H(137) | 622.6(45)  | 49.8(fixed)                             | — | 7.5   | 49.8  |
| <i>u</i> <sub>1634</sub> | H(18)...H(53)   | 622.6(93)  | 154.5(fixed)                            | — | 6.6   | 154.5 |
| <i>u</i> <sub>1623</sub> | H(74)...C(79)   | 622.7(36)  | 39.7(fixed)                             | — | -7.0  | 39.7  |
| <i>u</i> <sub>1549</sub> | H(73)...C(79)   | 622.8(27)  | 36.8(fixed)                             | — | -7.6  | 36.8  |
| <i>u</i> <sub>1473</sub> | H(14)...H(22)   | 622.9(43)  | 67.6(fixed)                             | — | -10.5 | 67.6  |
| <i>u</i> <sub>1164</sub> | H(70)...H(84)   | 622.9(64)  | 72.7(fixed)                             | — | -9.3  | 72.7  |
| <i>u</i> <sub>1313</sub> | H(129)...H(164) | 623.3(193) | 67.7(fixed)                             | — | 1.6   | 67.7  |
| <i>u</i> <sub>1429</sub> | Si(57)...H(68)  | 623.5(12)  | 19.2(fixed)                             | — | -7.6  | 19.2  |
| <i>u</i> <sub>1544</sub> | Si(4)...C(51)   | 623.6(44)  | 89.4(tied to <i>u</i> <sub>1181</sub> ) | — | -11.7 | 73.9  |
| <i>u</i> <sub>1371</sub> | H(69)...H(76)   | 623.7(37)  | 47.6(fixed)                             | — | 0.1   | 47.6  |
| <i>u</i> <sub>815</sub>  | H(76)...H(102)  | 623.7(235) | 80.6(fixed)                             | — | 9.7   | 80.6  |
| <i>u</i> <sub>1683</sub> | C(79)...C(107)  | 623.7(95)  | 43.2(tied to <i>u</i> <sub>1181</sub> ) | — | 0.2   | 35.7  |
| <i>u</i> <sub>1507</sub> | C(79)...H(111)  | 624.6(41)  | 20.6(fixed)                             | — | -5.9  | 20.6  |
| <i>u</i> <sub>1786</sub> | H(65)...H(98)   | 625.0(220) | 74.3(fixed)                             | — | -6.3  | 74.3  |
| <i>u</i> <sub>1341</sub> | C(127)...C(163) | 625.3(151) | 67.7(tied to <i>u</i> <sub>1181</sub> ) | — | -4.9  | 55.9  |
| <i>u</i> <sub>1185</sub> | H(126)...H(133) | 625.7(58)  | 80.2(fixed)                             | — | 5.0   | 80.2  |
| <i>u</i> <sub>1453</sub> | H(8)...H(25)    | 626.2(34)  | 50.3(fixed)                             | — | 5.0   | 50.3  |
| <i>u</i> <sub>1461</sub> | Si(59)...H(78)  | 626.2(16)  | 17.9(fixed)                             | — | -6.1  | 17.9  |
| <i>u</i> <sub>1519</sub> | H(128)...H(141) | 627.0(36)  | 54.1(fixed)                             | — | -5.3  | 54.1  |
| <i>u</i> <sub>1538</sub> | H(70)...H(97)   | 627.1(118) | 100.6(fixed)                            | — | -0.4  | 100.6 |
| <i>u</i> <sub>1418</sub> | H(73)...H(100)  | 627.2(172) | 69.8(fixed)                             | — | -2.5  | 69.8  |
| <i>u</i> <sub>1567</sub> | H(69)...H(98)   | 627.2(120) | 76.3(fixed)                             | — | -0.4  | 76.3  |
| <i>u</i> <sub>1409</sub> | H(33)...C(47)   | 627.7(34)  | 42.5(fixed)                             | — | 5.3   | 42.5  |
| <i>u</i> <sub>1626</sub> | C(67)...C(95)   | 627.9(129) | 80.6(tied to <i>u</i> <sub>1181</sub> ) | — | -5.7  | 66.6  |
| <i>u</i> <sub>1070</sub> | H(65)...H(98)   | 628.0(221) | 85.6(fixed)                             | — | -0.5  | 85.6  |
| <i>u</i> <sub>1637</sub> | C(119)...C(159) | 628.4(53)  | 56.1(tied to <i>u</i> <sub>1181</sub> ) | — | -7.2  | 46.4  |
| <i>u</i> <sub>1376</sub> | H(17)...H(36)   | 628.4(66)  | 56.6(fixed)                             | — | 11.3  | 56.6  |
| <i>u</i> <sub>1320</sub> | H(126)...C(131) | 628.5(45)  | 61.5(fixed)                             | — | -3.4  | 61.5  |
| <i>u</i> <sub>1175</sub> | H(76)...H(102)  | 628.8(233) | 50.1(fixed)                             | — | 8.4   | 50.1  |
| <i>u</i> <sub>1620</sub> | C(67)...H(97)   | 628.9(135) | 88.6(fixed)                             | — | -5.7  | 88.6  |
| <i>u</i> <sub>1393</sub> | H(9)...H(25)    | 628.9(40)  | 55.9(fixed)                             | — | 21.1  | 55.9  |
| <i>u</i> <sub>1451</sub> | Si(60)...H(74)  | 628.9(14)  | 17.9(fixed)                             | — | -6.7  | 17.9  |
| <i>u</i> <sub>1552</sub> | H(17)...H(30)   | 629.0(43)  | 76.5(fixed)                             | — | -28.4 | 76.5  |
| <i>u</i> <sub>1355</sub> | H(129)...H(137) | 629.1(35)  | 49.0(fixed)                             | — | 3.0   | 49.0  |
| <i>u</i> <sub>1230</sub> | C(123)...H(133) | 629.8(43)  | 59.0(fixed)                             | — | 0.7   | 59.0  |
| <i>u</i> <sub>1593</sub> | H(66)...H(93)   | 630.0(101) | 84.5(fixed)                             | — | 4.4   | 84.5  |

|                          |                  |            |                                         |   |       |      |
|--------------------------|------------------|------------|-----------------------------------------|---|-------|------|
| <i>u</i> <sub>1315</sub> | H(125)...H(134)  | 630.1(49)  | 55.9(fixed)                             | — | 2.5   | 55.9 |
| <i>u</i> <sub>1439</sub> | Si(115)...H(134) | 630.1(13)  | 21.3(fixed)                             | — | -8.9  | 21.3 |
| <i>u</i> <sub>1302</sub> | H(88)...H(108)   | 630.3(62)  | 57.0(fixed)                             | — | -8.0  | 57.0 |
| <i>u</i> <sub>1537</sub> | H(69)...H(98)    | 630.7(119) | 70.9(fixed)                             | — | 1.9   | 70.9 |
| <i>u</i> <sub>1431</sub> | Si(113)...H(124) | 630.7(12)  | 20.3(fixed)                             | — | -6.6  | 20.3 |
| <i>u</i> <sub>1462</sub> | Si(116)...H(130) | 630.9(13)  | 19.5(fixed)                             | — | -7.5  | 19.5 |
| <i>u</i> <sub>589</sub>  | H(98)...H(109)   | 630.9(42)  | 13.7(fixed)                             | — | -4.3  | 13.7 |
| <i>u</i> <sub>1358</sub> | Si(115)...H(165) | 631.3(103) | 67.9(fixed)                             | — | -7.8  | 67.9 |
| <i>u</i> <sub>1602</sub> | Si(115)...H(160) | 631.4(52)  | 43.5(fixed)                             | — | -6.5  | 43.5 |
| <i>u</i> <sub>1518</sub> | H(12)...H(53)    | 631.5(120) | 97.3(fixed)                             | — | 21.3  | 97.3 |
| <i>u</i> <sub>1352</sub> | H(73)...H(85)    | 631.5(42)  | 42.9(fixed)                             | — | -1.1  | 42.9 |
| <i>u</i> <sub>1653</sub> | H(126)...H(142)  | 631.8(55)  | 47.9(fixed)                             | — | -12.8 | 47.9 |
| <i>u</i> <sub>1381</sub> | H(124)...H(167)  | 631.8(49)  | 39.9(fixed)                             | — | -5.3  | 39.9 |
| <i>u</i> <sub>1338</sub> | H(121)...H(138)  | 632.1(60)  | 70.7(fixed)                             | — | -6.6  | 70.7 |
| <i>u</i> <sub>1503</sub> | H(13)...C(19)    | 632.4(35)  | 62.0(fixed)                             | — | -19.5 | 62.0 |
| <i>u</i> <sub>1628</sub> | H(126)...H(157)  | 632.4(110) | 67.9(fixed)                             | — | 6.1   | 67.9 |
| <i>u</i> <sub>1556</sub> | Si(115)...C(159) | 632.6(47)  | 30.9(tied to <i>u</i> <sub>1181</sub> ) | — | -7.5  | 25.5 |
| <i>u</i> <sub>1768</sub> | C(131)...H(156)  | 633.0(172) | 66.9(fixed)                             | — | -7.9  | 66.9 |
| <i>u</i> <sub>1585</sub> | H(42)...H(46)    | 633.6(57)  | 74.2(fixed)                             | — | -12.1 | 74.2 |
| <i>u</i> <sub>1359</sub> | C(63)...C(75)    | 633.9(26)  | 38.9(tied to <i>u</i> <sub>1181</sub> ) | — | -2.7  | 32.2 |
| <i>u</i> <sub>1457</sub> | C(7)...C(27)     | 634.1(31)  | 53.3(tied to <i>u</i> <sub>1181</sub> ) | — | -4.4  | 44.0 |
| <i>u</i> <sub>1720</sub> | H(130)...H(160)  | 634.5(93)  | 79.8(fixed)                             | — | -5.7  | 79.8 |
| <i>u</i> <sub>883</sub>  | C(75)...H(98)    | 634.7(151) | 62.6(fixed)                             | — | 2.8   | 62.6 |
| <i>u</i> <sub>1446</sub> | H(128)...H(154)  | 634.7(146) | 63.5(fixed)                             | — | 6.2   | 63.5 |
| <i>u</i> <sub>1493</sub> | Si(4)...C(35)    | 634.8(56)  | 40.4(tied to <i>u</i> <sub>1181</sub> ) | — | -4.5  | 33.4 |
| <i>u</i> <sub>1345</sub> | Si(115)...H(153) | 635.0(82)  | 53.9(fixed)                             | — | 1.8   | 53.9 |
| <i>u</i> <sub>1474</sub> | Si(4)...H(9)     | 635.0(13)  | 19.4(fixed)                             | — | -8.1  | 19.4 |
| <i>u</i> <sub>1644</sub> | C(131)...H(164)  | 635.1(193) | 72.8(fixed)                             | — | -4.7  | 72.8 |
| <i>u</i> <sub>1454</sub> | Si(115)...H(164) | 635.3(121) | 75.7(fixed)                             | — | -7.5  | 75.7 |
| <i>u</i> <sub>1447</sub> | H(132)...H(161)  | 635.6(78)  | 83.0(fixed)                             | — | 21.0  | 83.0 |
| <i>u</i> <sub>1369</sub> | Si(60)...H(88)   | 636.0(125) | 65.7(fixed)                             | — | -5.8  | 65.7 |
| <i>u</i> <sub>1580</sub> | C(39)...H(46)    | 636.0(38)  | 51.3(fixed)                             | — | -14.5 | 51.3 |
| <i>u</i> <sub>1527</sub> | C(11)...H(20)    | 636.0(30)  | 58.1(fixed)                             | — | -21.7 | 58.1 |
| <i>u</i> <sub>1711</sub> | H(64)...H(98)    | 636.2(151) | 58.6(fixed)                             | — | -7.1  | 58.6 |
| <i>u</i> <sub>1378</sub> | Si(60)...C(95)   | 636.4(61)  | 46.8(tied to <i>u</i> <sub>1181</sub> ) | — | -4.9  | 38.7 |
| <i>u</i> <sub>1577</sub> | C(67)...H(78)    | 636.5(42)  | 33.5(fixed)                             | — | -5.1  | 33.5 |
| <i>u</i> <sub>1154</sub> | H(64)...H(76)    | 637.2(44)  | 58.7(fixed)                             | — | 5.8   | 58.7 |
| <i>u</i> <sub>1335</sub> | C(71)...C(83)    | 637.3(30)  | 33.3(tied to <i>u</i> <sub>1181</sub> ) | — | -4.3  | 27.6 |
| <i>u</i> <sub>1663</sub> | H(122)...H(145)  | 637.4(157) | 68.9(fixed)                             | — | 8.0   | 68.9 |
| <i>u</i> <sub>1438</sub> | Si(115)...C(151) | 637.9(50)  | 35.9(tied to <i>u</i> <sub>1181</sub> ) | — | -0.5  | 29.7 |
| <i>u</i> <sub>1789</sub> | H(124)...H(142)  | 638.0(68)  | 52.8(fixed)                             | — | -13.5 | 52.8 |
| <i>u</i> <sub>1385</sub> | H(129)...H(165)  | 638.0(138) | 56.2(fixed)                             | — | -0.1  | 56.2 |
| <i>u</i> <sub>1560</sub> | H(32)...H(48)    | 638.2(49)  | 73.3(fixed)                             | — | 4.3   | 73.3 |
| <i>u</i> <sub>1616</sub> | H(70)...H(76)    | 638.4(47)  | 48.1(fixed)                             | — | -8.1  | 48.1 |
| <i>u</i> <sub>1223</sub> | H(77)...H(111)   | 638.5(35)  | 40.2(fixed)                             | — | -4.0  | 40.2 |
| <i>u</i> <sub>1588</sub> | C(11)...H(21)    | 638.7(27)  | 42.3(fixed)                             | — | -25.1 | 42.3 |

|                          |                  |            |                                         |   |       |       |
|--------------------------|------------------|------------|-----------------------------------------|---|-------|-------|
| <i>u</i> <sub>1416</sub> | C(7)...H(32)     | 638.9(135) | 52.2(fixed)                             | — | -1.8  | 52.2  |
| <i>u</i> <sub>1595</sub> | Si(115)...H(145) | 639.9(56)  | 45.8(fixed)                             | — | 1.0   | 45.8  |
| <i>u</i> <sub>1810</sub> | H(16)...H(53)    | 639.9(79)  | 151.5(fixed)                            | — | -13.8 | 151.5 |
| <i>u</i> <sub>1488</sub> | Si(1)...H(18)    | 640.0(10)  | 18.8(fixed)                             | — | -7.5  | 18.8  |
| <i>u</i> <sub>1778</sub> | H(125)...H(157)  | 640.2(72)  | 62.6(fixed)                             | — | -0.7  | 62.6  |
| <i>u</i> <sub>1546</sub> | H(128)...C(159)  | 640.2(106) | 72.8(fixed)                             | — | -7.7  | 72.8  |
| <i>u</i> <sub>1570</sub> | H(34)...H(48)    | 640.4(37)  | 57.0(fixed)                             | — | -5.8  | 57.0  |
| <i>u</i> <sub>1159</sub> | H(137)...H(166)  | 640.4(120) | 88.1(fixed)                             | — | 16.7  | 88.1  |
| <i>u</i> <sub>1606</sub> | H(10)...H(50)    | 640.5(85)  | 92.3(fixed)                             | — | -12.2 | 92.3  |
| <i>u</i> <sub>1496</sub> | Si(113)...H(138) | 640.5(15)  | 18.2(fixed)                             | — | -8.7  | 18.2  |
| <i>u</i> <sub>1543</sub> | H(20)...C(51)    | 640.5(84)  | 94.1(fixed)                             | — | -3.2  | 94.1  |
| <i>u</i> <sub>1655</sub> | H(29)...H(37)    | 640.8(100) | 89.2(fixed)                             | — | -1.2  | 89.2  |
| <i>u</i> <sub>1689</sub> | Si(4)...H(53)    | 641.9(47)  | 93.6(fixed)                             | — | -21.6 | 93.6  |
| <i>u</i> <sub>1550</sub> | H(9)...H(44)     | 642.0(126) | 148.8(fixed)                            | — | -15.6 | 148.8 |
| <i>u</i> <sub>1679</sub> | H(126)...H(140)  | 642.0(61)  | 56.1(fixed)                             | — | -13.8 | 56.1  |
| <i>u</i> <sub>1413</sub> | H(125)...H(132)  | 642.1(37)  | 50.1(fixed)                             | — | -4.0  | 50.1  |
| <i>u</i> <sub>1707</sub> | H(18)...H(21)    | 642.3(55)  | 92.6(fixed)                             | — | -23.0 | 92.6  |
| <i>u</i> <sub>1575</sub> | H(17)...H(52)    | 642.6(81)  | 124.6(fixed)                            | — | 6.6   | 124.6 |
| <i>u</i> <sub>1695</sub> | Si(3)...H(49)    | 643.1(58)  | 74.8(fixed)                             | — | -14.6 | 74.8  |
| <i>u</i> <sub>1627</sub> | H(124)...C(155)  | 643.1(109) | 45.3(fixed)                             | — | 7.7   | 45.3  |
| <i>u</i> <sub>1658</sub> | Si(61)...C(83)   | 643.7(73)  | 36.3(tied to <i>u</i> <sub>1181</sub> ) | — | -5.4  | 30.0  |
| <i>u</i> <sub>1657</sub> | Si(59)...C(107)  | 643.7(73)  | 36.3(tied to <i>u</i> <sub>1181</sub> ) | — | -5.4  | 30.0  |
| <i>u</i> <sub>1435</sub> | H(8)...H(40)     | 644.0(85)  | 63.7(fixed)                             | — | 11.2  | 63.7  |
| <i>u</i> <sub>1635</sub> | C(63)...C(107)   | 644.2(151) | 71.2(tied to <i>u</i> <sub>1181</sub> ) | — | -3.6  | 58.8  |
| <i>u</i> <sub>1484</sub> | Si(57)...H(82)   | 644.4(15)  | 18.1(fixed)                             | — | -6.6  | 18.1  |
| <i>u</i> <sub>1523</sub> | H(14)...H(54)    | 644.7(84)  | 60.5(fixed)                             | — | 8.1   | 60.5  |
| <i>u</i> <sub>1521</sub> | C(15)...C(35)    | 645.2(56)  | 56.9(tied to <i>u</i> <sub>1181</sub> ) | — | 0.2   | 47.0  |
| <i>u</i> <sub>1540</sub> | C(7)...H(46)     | 646.1(115) | 98.0(fixed)                             | — | -9.6  | 98.0  |
| <i>u</i> <sub>1545</sub> | H(13)...H(20)    | 646.1(44)  | 84.2(fixed)                             | — | -18.8 | 84.2  |
| <i>u</i> <sub>1237</sub> | C(71)...H(101)   | 646.3(162) | 67.4(fixed)                             | — | -0.3  | 67.4  |
| <i>u</i> <sub>646</sub>  | H(64)...H(98)    | 646.3(153) | 95.0(fixed)                             | — | 11.7  | 95.0  |
| <i>u</i> <sub>1535</sub> | H(136)...H(167)  | 646.8(40)  | 38.9(fixed)                             | — | -2.9  | 38.9  |
| <i>u</i> <sub>1445</sub> | H(30)...H(38)    | 646.8(115) | 75.6(fixed)                             | — | 25.0  | 75.6  |
| <i>u</i> <sub>1469</sub> | H(64)...H(77)    | 647.1(34)  | 45.8(fixed)                             | — | -2.4  | 45.8  |
| <i>u</i> <sub>1487</sub> | H(8)...C(27)     | 647.2(37)  | 46.0(fixed)                             | — | 0.6   | 46.0  |
| <i>u</i> <sub>1555</sub> | H(8)...C(23)     | 648.2(25)  | 35.4(fixed)                             | — | -4.1  | 35.4  |
| <i>u</i> <sub>1485</sub> | H(8)...H(30)     | 648.5(48)  | 68.4(fixed)                             | — | 1.8   | 68.4  |
| <i>u</i> <sub>1525</sub> | C(7)...H(30)     | 648.7(39)  | 65.8(fixed)                             | — | -9.0  | 65.8  |
| <i>u</i> <sub>1832</sub> | H(9)...H(49)     | 648.8(93)  | 116.0(fixed)                            | — | -12.8 | 116.0 |
| <i>u</i> <sub>1526</sub> | C(119)...H(133)  | 648.9(24)  | 36.2(fixed)                             | — | -8.9  | 36.2  |
| <i>u</i> <sub>1776</sub> | C(119)...H(160)  | 649.3(69)  | 44.6(fixed)                             | — | -9.4  | 44.6  |
| <i>u</i> <sub>1534</sub> | C(67)...H(76)    | 649.3(31)  | 31.4(fixed)                             | — | -5.9  | 31.4  |
| <i>u</i> <sub>860</sub>  | H(76)...H(101)   | 649.4(201) | 77.2(fixed)                             | — | 3.4   | 77.2  |
| <i>u</i> <sub>1517</sub> | C(135)...H(167)  | 649.5(25)  | 21.5(fixed)                             | — | -5.3  | 21.5  |
| <i>u</i> <sub>1597</sub> | H(42)...H(52)    | 649.6(56)  | 77.5(fixed)                             | — | -16.4 | 77.5  |
| <i>u</i> <sub>1482</sub> | Si(6)...H(17)    | 649.9(46)  | 53.5(fixed)                             | — | 0.4   | 53.5  |

|                          |                 |            |                                         |   |       |       |
|--------------------------|-----------------|------------|-----------------------------------------|---|-------|-------|
| <i>u</i> <sub>1672</sub> | Si(59)...H(90)  | 650.5(61)  | 46.6(fixed)                             | — | -11.4 | 46.6  |
| <i>u</i> <sub>1093</sub> | H(73)...H(104)  | 650.6(70)  | 77.7(fixed)                             | — | 14.7  | 77.7  |
| <i>u</i> <sub>1839</sub> | H(64)...H(97)   | 650.6(172) | 75.5(fixed)                             | — | -12.4 | 75.5  |
| <i>u</i> <sub>1737</sub> | H(72)...H(77)   | 651.2(49)  | 47.2(fixed)                             | — | -1.4  | 47.2  |
| <i>u</i> <sub>1424</sub> | H(129)...H(149) | 651.3(104) | 65.0(fixed)                             | — | 11.9  | 65.0  |
| <i>u</i> <sub>1599</sub> | H(132)...C(159) | 651.8(95)  | 69.1(fixed)                             | — | 8.0   | 69.1  |
| <i>u</i> <sub>1530</sub> | C(15)...H(55)   | 652.1(19)  | 20.7(fixed)                             | — | -5.5  | 20.7  |
| <i>u</i> <sub>1622</sub> | H(129)...H(154) | 652.2(110) | 55.4(fixed)                             | — | 0.8   | 55.4  |
| <i>u</i> <sub>1624</sub> | C(7)...H(45)    | 652.5(87)  | 104.5(fixed)                            | — | -27.6 | 104.5 |
| <i>u</i> <sub>1774</sub> | H(124)...H(140) | 652.5(61)  | 61.3(fixed)                             | — | -11.9 | 61.3  |
| <i>u</i> <sub>1476</sub> | C(7)...H(33)    | 652.5(112) | 47.6(fixed)                             | — | -8.1  | 47.6  |
| <i>u</i> <sub>1906</sub> | C(79)...H(109)  | 653.2(109) | 48.3(fixed)                             | — | -3.7  | 48.3  |
| <i>u</i> <sub>1645</sub> | H(24)...H(54)   | 653.5(54)  | 151.0(fixed)                            | — | 16.0  | 151.0 |
| <i>u</i> <sub>1691</sub> | H(125)...C(155) | 653.8(64)  | 39.8(fixed)                             | — | 2.4   | 39.8  |
| <i>u</i> <sub>1498</sub> | H(129)...C(135) | 654.6(26)  | 31.8(fixed)                             | — | -4.5  | 31.8  |
| <i>u</i> <sub>1041</sub> | H(90)...H(102)  | 654.9(44)  | 55.5(fixed)                             | — | 0.6   | 55.5  |
| <i>u</i> <sub>1186</sub> | H(21)...H(46)   | 654.9(130) | 95.8(fixed)                             | — | 55.3  | 95.8  |
| <i>u</i> <sub>1557</sub> | Si(3)...C(39)   | 655.4(35)  | 28.6(tied to <i>u</i> <sub>1181</sub> ) | — | -3.6  | 23.6  |
| <i>u</i> <sub>1566</sub> | Si(3)...H(45)   | 655.4(55)  | 86.3(fixed)                             | — | -17.3 | 86.3  |
| <i>u</i> <sub>1337</sub> | H(76)...H(106)  | 655.5(101) | 55.6(fixed)                             | — | 10.1  | 55.6  |
| <i>u</i> <sub>1639</sub> | H(122)...H(133) | 655.5(37)  | 45.5(fixed)                             | — | -11.1 | 45.5  |
| <i>u</i> <sub>1680</sub> | Si(3)...C(47)   | 655.5(44)  | 51.7(tied to <i>u</i> <sub>1181</sub> ) | — | -16.2 | 42.7  |
| <i>u</i> <sub>1373</sub> | C(71)...H(86)   | 656.0(37)  | 52.4(fixed)                             | — | -4.5  | 52.4  |
| <i>u</i> <sub>1433</sub> | C(127)...H(153) | 656.1(149) | 56.1(fixed)                             | — | 6.8   | 56.1  |
| <i>u</i> <sub>1478</sub> | H(73)...C(83)   | 656.2(33)  | 32.5(fixed)                             | — | -4.9  | 32.5  |
| <i>u</i> <sub>1434</sub> | H(64)...H(78)   | 656.5(44)  | 52.2(fixed)                             | — | 1.7   | 52.2  |
| <i>u</i> <sub>1501</sub> | C(71)...H(100)  | 657.3(163) | 62.8(fixed)                             | — | -5.7  | 62.8  |
| <i>u</i> <sub>1547</sub> | H(80)...H(111)  | 657.9(29)  | 34.1(fixed)                             | — | -5.0  | 34.1  |
| <i>u</i> <sub>1610</sub> | H(21)...C(51)   | 658.0(90)  | 112.9(fixed)                            | — | -1.7  | 112.9 |
| <i>u</i> <sub>1748</sub> | H(10)...H(48)   | 659.0(65)  | 82.7(fixed)                             | — | -32.4 | 82.7  |
| <i>u</i> <sub>1463</sub> | H(73)...H(86)   | 659.1(44)  | 57.5(fixed)                             | — | -2.2  | 57.5  |
| <i>u</i> <sub>1798</sub> | H(120)...H(145) | 659.1(148) | 68.3(fixed)                             | — | 6.3   | 68.3  |
| <i>u</i> <sub>1414</sub> | H(66)...C(75)   | 659.3(34)  | 49.3(fixed)                             | — | -2.6  | 49.3  |
| <i>u</i> <sub>1510</sub> | H(8)...H(42)    | 659.5(60)  | 55.0(fixed)                             | — | 4.8   | 55.0  |
| <i>u</i> <sub>1590</sub> | C(127)...H(154) | 659.7(108) | 48.4(fixed)                             | — | 1.7   | 48.4  |
| <i>u</i> <sub>1396</sub> | C(15)...H(44)   | 659.8(86)  | 105.5(fixed)                            | — | 18.2  | 105.5 |
| <i>u</i> <sub>1564</sub> | H(10)...H(29)   | 660.0(37)  | 58.0(fixed)                             | — | -6.4  | 58.0  |
| <i>u</i> <sub>1716</sub> | H(66)...C(91)   | 660.6(85)  | 68.8(fixed)                             | — | -2.3  | 68.8  |
| <i>u</i> <sub>1579</sub> | H(16)...H(55)   | 660.6(27)  | 36.8(fixed)                             | — | -4.2  | 36.8  |
| <i>u</i> <sub>1643</sub> | H(128)...C(139) | 660.6(27)  | 36.1(fixed)                             | — | -8.5  | 36.1  |
| <i>u</i> <sub>1730</sub> | H(18)...C(19)   | 660.8(36)  | 53.7(fixed)                             | — | -23.7 | 53.7  |
| <i>u</i> <sub>1617</sub> | C(119)...H(134) | 661.0(35)  | 41.1(fixed)                             | — | -9.0  | 41.1  |
| <i>u</i> <sub>1571</sub> | Si(6)...C(15)   | 661.0(39)  | 43.5(tied to <i>u</i> <sub>1181</sub> ) | — | -4.9  | 36.0  |
| <i>u</i> <sub>1312</sub> | H(69)...H(100)  | 661.1(124) | 79.9(fixed)                             | — | 8.7   | 79.9  |
| <i>u</i> <sub>1591</sub> | H(9)...C(23)    | 661.1(32)  | 40.3(fixed)                             | — | 4.4   | 40.3  |
| <i>u</i> <sub>1539</sub> | H(129)...H(136) | 661.4(37)  | 49.3(fixed)                             | — | -5.8  | 49.3  |

|                          |                  |            |                                          |   |       |       |
|--------------------------|------------------|------------|------------------------------------------|---|-------|-------|
| <i>u</i> <sub>1607</sub> | Si(116)...C(147) | 661.5(59)  | 32.2(tied to <i>u</i> <sub>1181</sub> )  | — | -4.2  | 26.6  |
| <i>u</i> <sub>1975</sub> | H(81)...C(107)   | 662.1(122) | 35.9(fixed)                              | — | -5.3  | 35.9  |
| <i>u</i> <sub>1694</sub> | Si(116)...H(158) | 662.2(123) | 51.6(fixed)                              | — | -8.1  | 51.6  |
| <i>u</i> <sub>1749</sub> | C(71)...H(82)    | 663.2(32)  | 36.7(fixed)                              | — | -10.9 | 36.7  |
| <i>u</i> <sub>1928</sub> | H(65)...C(95)    | 663.9(203) | 67.4(fixed)                              | — | -12.0 | 67.4  |
| <i>u</i> <sub>1688</sub> | C(127)...H(162)  | 664.0(116) | 55.1(fixed)                              | — | -6.9  | 55.1  |
| <i>u</i> <sub>1346</sub> | H(72)...H(85)    | 664.8(38)  | 46.2(fixed)                              | — | -0.9  | 46.2  |
| <i>u</i> <sub>1568</sub> | H(17)...H(55)    | 664.9(28)  | 35.7(fixed)                              | — | -4.2  | 35.7  |
| <i>u</i> <sub>1574</sub> | C(7)...C(39)     | 665.3(56)  | 54.5(tied to <i>u</i> <sub>1181</sub> )  | — | -0.7  | 45.1  |
| <i>u</i> <sub>1233</sub> | H(24)...H(44)    | 665.3(106) | 122.1(fixed)                             | — | 43.9  | 122.1 |
| <i>u</i> <sub>1541</sub> | H(9)...H(29)     | 665.4(52)  | 79.8(fixed)                              | — | 8.5   | 79.8  |
| <i>u</i> <sub>1682</sub> | H(122)...H(134)  | 665.8(50)  | 56.5(fixed)                              | — | -10.1 | 56.5  |
| <i>u</i> <sub>1661</sub> | C(15)...H(37)    | 666.1(62)  | 74.3(fixed)                              | — | -5.2  | 74.3  |
| <i>u</i> <sub>1686</sub> | C(19)...C(51)    | 666.2(76)  | 108.3(tied to <i>u</i> <sub>1181</sub> ) | — | -8.8  | 89.5  |
| <i>u</i> <sub>1706</sub> | H(18)...H(30)    | 666.2(53)  | 98.5(fixed)                              | — | -27.4 | 98.5  |
| <i>u</i> <sub>1177</sub> | H(68)...H(86)    | 666.3(62)  | 72.6(fixed)                              | — | -8.4  | 72.6  |
| <i>u</i> <sub>1891</sub> | H(82)...C(107)   | 666.4(109) | 42.8(fixed)                              | — | 0.6   | 42.8  |
| <i>u</i> <sub>1668</sub> | H(126)...C(155)  | 666.6(106) | 42.1(fixed)                              | — | 3.0   | 42.1  |
| <i>u</i> <sub>1727</sub> | H(130)...C(139)  | 666.8(39)  | 46.7(fixed)                              | — | -8.3  | 46.7  |
| <i>u</i> <sub>1214</sub> | H(66)...H(105)   | 667.0(70)  | 82.3(fixed)                              | — | 5.8   | 82.3  |
| <i>u</i> <sub>1718</sub> | H(16)...C(51)    | 667.7(61)  | 102.1(fixed)                             | — | -2.4  | 102.1 |
| <i>u</i> <sub>1808</sub> | C(7)...H(48)     | 668.2(61)  | 64.6(fixed)                              | — | -27.4 | 64.6  |
| <i>u</i> <sub>1815</sub> | H(130)...C(159)  | 668.2(102) | 57.1(fixed)                              | — | -10.2 | 57.1  |
| <i>u</i> <sub>1625</sub> | H(18)...C(51)    | 668.2(77)  | 94.8(fixed)                              | — | 13.4  | 94.8  |
| <i>u</i> <sub>1743</sub> | C(7)...H(50)     | 668.3(83)  | 69.6(fixed)                              | — | -11.7 | 69.6  |
| <i>u</i> <sub>1340</sub> | C(63)...H(76)    | 668.5(33)  | 44.9(fixed)                              | — | 0.3   | 44.9  |
| <i>u</i> <sub>1589</sub> | C(63)...H(77)    | 669.3(23)  | 32.4(fixed)                              | — | -5.6  | 32.4  |
| <i>u</i> <sub>1383</sub> | C(19)...H(46)    | 669.6(119) | 82.0(fixed)                              | — | 33.1  | 82.0  |
| <i>u</i> <sub>1584</sub> | H(137)...H(167)  | 669.6(25)  | 36.2(fixed)                              | — | -4.8  | 36.2  |
| <i>u</i> <sub>1945</sub> | H(66)...H(96)    | 669.7(189) | 67.3(fixed)                              | — | -12.5 | 67.3  |
| <i>u</i> <sub>1801</sub> | Si(60)...H(105)  | 669.9(68)  | 26.8(fixed)                              | — | -4.1  | 26.8  |
| <i>u</i> <sub>1533</sub> | H(130)...C(135)  | 669.9(36)  | 33.3(fixed)                              | — | -2.8  | 33.3  |
| <i>u</i> <sub>1554</sub> | C(123)...H(132)  | 669.9(26)  | 39.2(fixed)                              | — | -8.9  | 39.2  |
| <i>u</i> <sub>1822</sub> | C(119)...H(162)  | 670.0(63)  | 56.7(fixed)                              | — | -6.9  | 56.7  |
| <i>u</i> <sub>1618</sub> | C(7)...H(41)     | 670.4(40)  | 57.7(fixed)                              | — | 2.1   | 57.7  |
| <i>u</i> <sub>1816</sub> | H(30)...H(54)    | 670.6(55)  | 83.0(fixed)                              | — | -17.6 | 83.0  |
| <i>u</i> <sub>1670</sub> | H(134)...H(167)  | 670.6(45)  | 29.9(fixed)                              | — | -9.7  | 29.9  |
| <i>u</i> <sub>1652</sub> | H(66)...H(109)   | 670.9(125) | 66.8(fixed)                              | — | 0.4   | 66.8  |
| <i>u</i> <sub>1769</sub> | H(66)...H(89)    | 671.0(68)  | 54.9(fixed)                              | — | -5.1  | 54.9  |
| <i>u</i> <sub>1398</sub> | H(138)...H(166)  | 671.0(137) | 62.7(fixed)                              | — | 12.2  | 62.7  |
| <i>u</i> <sub>1880</sub> | H(68)...H(97)    | 671.1(168) | 100.0(fixed)                             | — | -7.5  | 100.0 |
| <i>u</i> <sub>1883</sub> | C(131)...C(155)  | 671.2(146) | 61.5(tied to <i>u</i> <sub>1181</sub> )  | — | -11.6 | 50.8  |
| <i>u</i> <sub>1649</sub> | H(10)...H(21)    | 671.7(43)  | 73.3(fixed)                              | — | -3.0  | 73.3  |
| <i>u</i> <sub>1692</sub> | Si(59)...H(93)   | 672.0(70)  | 53.1(fixed)                              | — | -5.2  | 53.1  |
| <i>u</i> <sub>1753</sub> | H(25)...H(36)    | 672.1(97)  | 80.7(fixed)                              | — | 13.2  | 80.7  |
| <i>u</i> <sub>1316</sub> | H(68)...H(84)    | 672.3(62)  | 62.9(fixed)                              | — | -9.2  | 62.9  |

|                          |                  |            |                                         |   |       |       |
|--------------------------|------------------|------------|-----------------------------------------|---|-------|-------|
| <i>u</i> <sub>1647</sub> | H(121)...H(165)  | 672.4(177) | 106.7(fixed)                            | — | -12.0 | 106.7 |
| <i>u</i> <sub>1763</sub> | C(71)...H(77)    | 672.4(34)  | 31.2(fixed)                             | — | -4.2  | 31.2  |
| <i>u</i> <sub>1877</sub> | H(64)...C(95)    | 672.5(138) | 52.1(fixed)                             | — | -13.4 | 52.1  |
| <i>u</i> <sub>1736</sub> | Si(59)...C(91)   | 672.8(72)  | 42.8(tied to <i>u</i> <sub>1181</sub> ) | — | -9.2  | 35.3  |
| <i>u</i> <sub>1349</sub> | H(74)...H(85)    | 672.9(51)  | 46.7(fixed)                             | — | 3.1   | 46.7  |
| <i>u</i> <sub>1717</sub> | H(13)...H(21)    | 673.2(29)  | 52.9(fixed)                             | — | -28.2 | 52.9  |
| <i>u</i> <sub>1674</sub> | C(75)...H(105)   | 674.0(62)  | 41.0(fixed)                             | — | -1.1  | 41.0  |
| <i>u</i> <sub>1831</sub> | C(119)...H(145)  | 674.0(131) | 57.7(fixed)                             | — | 3.6   | 57.7  |
| <i>u</i> <sub>1506</sub> | H(130)...H(136)  | 674.5(52)  | 59.4(fixed)                             | — | -2.2  | 59.4  |
| <i>u</i> <sub>1407</sub> | H(65)...H(102)   | 674.7(234) | 95.3(fixed)                             | — | -5.3  | 95.3  |
| <i>u</i> <sub>1708</sub> | H(72)...H(82)    | 674.8(43)  | 51.3(fixed)                             | — | -8.3  | 51.3  |
| <i>u</i> <sub>1759</sub> | C(127)...H(161)  | 675.1(73)  | 49.3(fixed)                             | — | -10.9 | 49.3  |
| <i>u</i> <sub>1690</sub> | C(11)...H(22)    | 675.9(32)  | 48.3(fixed)                             | — | -18.3 | 48.3  |
| <i>u</i> <sub>1559</sub> | C(123)...H(154)  | 676.3(70)  | 53.0(fixed)                             | — | 6.8   | 53.0  |
| <i>u</i> <sub>1065</sub> | C(75)...H(102)   | 676.6(191) | 70.8(fixed)                             | — | 0.3   | 70.8  |
| <i>u</i> <sub>1762</sub> | H(72)...C(75)    | 676.9(34)  | 34.9(fixed)                             | — | -5.0  | 34.9  |
| <i>u</i> <sub>1648</sub> | H(12)...H(55)    | 677.1(35)  | 32.4(fixed)                             | — | -9.0  | 32.4  |
| <i>u</i> <sub>1725</sub> | H(128)...H(142)  | 677.1(39)  | 48.3(fixed)                             | — | -8.7  | 48.3  |
| <i>u</i> <sub>1437</sub> | C(67)...H(100)   | 677.1(132) | 68.5(fixed)                             | — | 0.4   | 68.5  |
| <i>u</i> <sub>1936</sub> | H(68)...H(77)    | 677.3(54)  | 34.5(fixed)                             | — | -12.0 | 34.5  |
| <i>u</i> <sub>1499</sub> | H(130)...H(166)  | 677.3(202) | 88.6(fixed)                             | — | -3.7  | 88.6  |
| <i>u</i> <sub>1687</sub> | C(7)...H(21)     | 677.7(30)  | 51.0(fixed)                             | — | -12.4 | 51.0  |
| <i>u</i> <sub>1330</sub> | H(66)...H(76)    | 678.1(45)  | 60.9(fixed)                             | — | 2.9   | 60.9  |
| <i>u</i> <sub>1502</sub> | H(72)...C(83)    | 678.2(26)  | 33.6(fixed)                             | — | -6.8  | 33.6  |
| <i>u</i> <sub>1728</sub> | Si(115)...C(143) | 678.2(41)  | 33.1(tied to <i>u</i> <sub>1181</sub> ) | — | -3.5  | 27.4  |
| <i>u</i> <sub>1656</sub> | H(65)...H(102)   | 678.5(233) | 80.1(fixed)                             | — | -5.4  | 80.1  |
| <i>u</i> <sub>1561</sub> | C(123)...H(134)  | 678.5(38)  | 43.4(fixed)                             | — | -7.3  | 43.4  |
| <i>u</i> <sub>1867</sub> | H(130)...H(142)  | 678.6(55)  | 55.7(fixed)                             | — | -10.8 | 55.7  |
| <i>u</i> <sub>1630</sub> | H(66)...H(108)   | 678.6(187) | 77.0(fixed)                             | — | 2.6   | 77.0  |
| <i>u</i> <sub>1735</sub> | H(14)...C(51)    | 678.7(80)  | 53.0(fixed)                             | — | -4.1  | 53.0  |
| <i>u</i> <sub>1600</sub> | Si(60)...H(97)   | 678.8(49)  | 49.8(fixed)                             | — | -10.2 | 49.8  |
| <i>u</i> <sub>1744</sub> | C(15)...H(52)    | 679.3(74)  | 97.8(fixed)                             | — | -0.2  | 97.8  |
| <i>u</i> <sub>1771</sub> | C(23)...H(54)    | 679.9(46)  | 125.1(fixed)                            | — | 4.2   | 125.1 |
| <i>u</i> <sub>1481</sub> | H(128)...H(166)  | 680.0(145) | 72.0(fixed)                             | — | -7.3  | 72.0  |
| <i>u</i> <sub>1864</sub> | Si(59)...H(109)  | 680.0(54)  | 32.4(fixed)                             | — | -7.4  | 32.4  |
| <i>u</i> <sub>1684</sub> | C(7)...C(19)     | 680.0(16)  | 32.3(tied to <i>u</i> <sub>1181</sub> ) | — | -13.6 | 26.7  |
| <i>u</i> <sub>1608</sub> | C(127)...C(151)  | 680.3(110) | 44.8(tied to <i>u</i> <sub>1181</sub> ) | — | 0.7   | 37.0  |
| <i>u</i> <sub>1562</sub> | H(129)...H(148)  | 680.3(50)  | 66.6(fixed)                             | — | 9.0   | 66.6  |
| <i>u</i> <sub>1794</sub> | H(68)...C(75)    | 680.4(38)  | 30.2(fixed)                             | — | -10.7 | 30.2  |
| <i>u</i> <sub>1664</sub> | H(10)...C(27)    | 680.6(24)  | 39.9(fixed)                             | — | -12.0 | 39.9  |
| <i>u</i> <sub>1715</sub> | Si(4)...H(37)    | 681.2(48)  | 42.3(fixed)                             | — | -9.5  | 42.3  |
| <i>u</i> <sub>1512</sub> | C(75)...H(102)   | 681.2(189) | 39.7(fixed)                             | — | -0.1  | 39.7  |
| <i>u</i> <sub>1392</sub> | H(20)...C(47)    | 681.7(86)  | 88.1(fixed)                             | — | 26.3  | 88.1  |
| <i>u</i> <sub>1871</sub> | H(120)...C(159)  | 681.8(58)  | 56.0(fixed)                             | — | -11.7 | 56.0  |
| <i>u</i> <sub>1671</sub> | H(12)...C(51)    | 682.2(105) | 59.0(fixed)                             | — | 10.6  | 59.0  |
| <i>u</i> <sub>1710</sub> | C(71)...C(75)    | 682.3(19)  | 21.6(tied to <i>u</i> <sub>1181</sub> ) | — | -5.5  | 17.9  |



|                          |                  |            |                                         |   |       |       |
|--------------------------|------------------|------------|-----------------------------------------|---|-------|-------|
| <i>u</i> <sub>1515</sub> | H(136)...H(166)  | 682.5(107) | 63.6(fixed)                             | — | -0.6  | 63.6  |
| <i>u</i> <sub>1697</sub> | Si(3)...H(41)    | 682.8(34)  | 32.9(fixed)                             | — | -4.4  | 32.9  |
| <i>u</i> <sub>1742</sub> | H(80)...C(107)   | 682.8(72)  | 48.0(fixed)                             | — | 0.8   | 48.0  |
| <i>u</i> <sub>1660</sub> | H(9)...H(55)     | 683.5(26)  | 29.6(fixed)                             | — | -9.0  | 29.6  |
| <i>u</i> <sub>1802</sub> | H(64)...H(108)   | 683.6(208) | 90.2(fixed)                             | — | -2.1  | 90.2  |
| <i>u</i> <sub>1830</sub> | C(63)...H(89)    | 683.9(64)  | 48.8(fixed)                             | — | -6.9  | 48.8  |
| <i>u</i> <sub>1731</sub> | H(9)...C(43)     | 684.1(106) | 104.2(fixed)                            | — | -20.4 | 104.2 |
| <i>u</i> <sub>1889</sub> | Si(59)...H(88)   | 684.3(103) | 44.1(fixed)                             | — | -13.7 | 44.1  |
| <i>u</i> <sub>1104</sub> | C(63)...H(104)   | 684.6(76)  | 80.3(fixed)                             | — | 10.0  | 80.3  |
| <i>u</i> <sub>1929</sub> | H(68)...C(95)    | 684.7(162) | 77.4(fixed)                             | — | -10.2 | 77.4  |
| <i>u</i> <sub>1629</sub> | H(9)...H(32)     | 684.8(154) | 65.3(fixed)                             | — | -1.8  | 65.3  |
| <i>u</i> <sub>1791</sub> | H(20)...H(53)    | 685.1(65)  | 89.7(fixed)                             | — | -17.2 | 89.7  |
| <i>u</i> <sub>1621</sub> | C(127)...H(164)  | 685.9(173) | 65.6(fixed)                             | — | -9.4  | 65.6  |
| <i>u</i> <sub>1858</sub> | C(27)...H(54)    | 686.2(49)  | 78.4(fixed)                             | — | -15.3 | 78.4  |
| <i>u</i> <sub>1896</sub> | H(64)...H(109)   | 686.3(157) | 75.6(fixed)                             | — | -8.0  | 75.6  |
| <i>u</i> <sub>1452</sub> | Si(59)...H(102)  | 686.5(123) | 54.1(fixed)                             | — | -5.9  | 54.1  |
| <i>u</i> <sub>1551</sub> | C(123)...H(166)  | 686.7(122) | 93.8(fixed)                             | — | 2.1   | 93.8  |
| <i>u</i> <sub>1745</sub> | H(40)...H(52)    | 686.7(56)  | 80.6(fixed)                             | — | -12.8 | 80.6  |
| <i>u</i> <sub>1700</sub> | H(10)...C(19)    | 687.0(27)  | 51.2(fixed)                             | — | -9.3  | 51.2  |
| <i>u</i> <sub>1666</sub> | Si(3)...H(46)    | 687.0(68)  | 63.6(fixed)                             | — | -7.4  | 63.6  |
| <i>u</i> <sub>1673</sub> | H(18)...C(35)    | 687.1(64)  | 54.9(fixed)                             | — | 2.1   | 54.9  |
| <i>u</i> <sub>1581</sub> | H(126)...H(132)  | 687.3(37)  | 62.1(fixed)                             | — | -8.4  | 62.1  |
| <i>u</i> <sub>1536</sub> | H(17)...C(43)    | 687.3(78)  | 89.9(fixed)                             | — | 8.9   | 89.9  |
| <i>u</i> <sub>1389</sub> | H(73)...H(105)   | 687.6(63)  | 73.5(fixed)                             | — | 6.9   | 73.5  |
| <i>u</i> <sub>1052</sub> | C(75)...H(101)   | 687.9(168) | 68.3(fixed)                             | — | -2.8  | 68.3  |
| <i>u</i> <sub>1876</sub> | H(70)...H(96)    | 688.1(131) | 91.7(fixed)                             | — | -5.9  | 91.7  |
| <i>u</i> <sub>1576</sub> | H(128)...C(163)  | 688.3(131) | 55.9(fixed)                             | — | -11.1 | 55.9  |
| <i>u</i> <sub>1417</sub> | H(76)...H(104)   | 688.9(73)  | 55.2(fixed)                             | — | 3.5   | 55.2  |
| <i>u</i> <sub>1572</sub> | H(125)...H(166)  | 689.0(108) | 100.3(fixed)                            | — | 6.0   | 100.3 |
| <i>u</i> <sub>1962</sub> | H(132)...H(157)  | 689.1(139) | 61.2(fixed)                             | — | -11.7 | 61.2  |
| <i>u</i> <sub>1902</sub> | H(9)...C(47)     | 689.4(80)  | 73.6(fixed)                             | — | -18.8 | 73.6  |
| <i>u</i> <sub>2024</sub> | H(69)...H(110)   | 690.4(116) | 60.4(fixed)                             | — | 1.8   | 60.4  |
| <i>u</i> <sub>1783</sub> | H(28)...H(36)    | 690.4(119) | 67.3(fixed)                             | — | 1.1   | 67.3  |
| <i>u</i> <sub>1508</sub> | Si(59)...H(102)  | 690.6(123) | 39.4(fixed)                             | — | -3.8  | 39.4  |
| <i>u</i> <sub>1427</sub> | H(126)...H(153)  | 690.6(123) | 81.9(fixed)                             | — | 11.3  | 81.9  |
| <i>u</i> <sub>1869</sub> | C(123)...H(158)  | 691.0(104) | 47.3(fixed)                             | — | -2.0  | 47.3  |
| <i>u</i> <sub>1942</sub> | H(121)...C(159)  | 691.1(62)  | 57.9(fixed)                             | — | -11.3 | 57.9  |
| <i>u</i> <sub>1219</sub> | H(66)...H(106)   | 691.3(121) | 84.6(fixed)                             | — | 9.8   | 84.6  |
| <i>u</i> <sub>1619</sub> | H(149)...H(158)  | 692.1(51)  | 67.6(fixed)                             | — | -8.7  | 67.6  |
| <i>u</i> <sub>1662</sub> | Si(116)...C(159) | 692.4(58)  | 32.3(tied to <i>u</i> <sub>1181</sub> ) | — | -5.5  | 26.7  |
| <i>u</i> <sub>1701</sub> | C(127)...C(131)  | 692.6(13)  | 24.9(tied to <i>u</i> <sub>1181</sub> ) | — | -7.9  | 20.6  |
| <i>u</i> <sub>1669</sub> | H(130)...C(163)  | 692.6(175) | 68.3(fixed)                             | — | -9.8  | 68.3  |
| <i>u</i> <sub>1819</sub> | Si(115)...H(161) | 692.8(40)  | 30.2(fixed)                             | — | -12.1 | 30.2  |
| <i>u</i> <sub>1522</sub> | C(135)...C(163)  | 693.2(98)  | 59.7(tied to <i>u</i> <sub>1181</sub> ) | — | -0.4  | 49.4  |
| <i>u</i> <sub>1613</sub> | Si(4)...H(46)    | 693.6(69)  | 52.2(fixed)                             | — | 2.9   | 52.2  |
| <i>u</i> <sub>1765</sub> | H(16)...C(35)    | 693.7(63)  | 49.1(fixed)                             | — | -3.8  | 49.1  |

|                          |                  |            |              |   |       |       |
|--------------------------|------------------|------------|--------------|---|-------|-------|
| <i>u</i> <sub>2003</sub> | C(79)...H(108)   | 693.8(103) | 48.5(fixed)  | — | -4.9  | 48.5  |
| <i>u</i> <sub>1868</sub> | H(134)...H(164)  | 694.0(217) | 83.4(fixed)  | — | -4.9  | 83.4  |
| <i>u</i> <sub>1747</sub> | H(10)...H(30)    | 694.9(31)  | 54.5(fixed)  | — | -16.7 | 54.5  |
| <i>u</i> <sub>1754</sub> | C(7)...H(20)     | 695.1(18)  | 36.6(fixed)  | — | -15.9 | 36.6  |
| <i>u</i> <sub>1640</sub> | C(127)...H(165)  | 695.2(121) | 52.9(fixed)  | — | -9.5  | 52.9  |
| <i>u</i> <sub>1818</sub> | H(66)...H(92)    | 695.6(45)  | 76.5(fixed)  | — | -1.9  | 76.5  |
| <i>u</i> <sub>1973</sub> | H(133)...H(164)  | 695.6(187) | 74.5(fixed)  | — | -17.3 | 74.5  |
| <i>u</i> <sub>1841</sub> | Si(115)...H(162) | 695.7(59)  | 33.3(fixed)  | — | -9.7  | 33.3  |
| <i>u</i> <sub>2074</sub> | H(82)...H(109)   | 695.9(130) | 54.6(fixed)  | — | -4.7  | 54.6  |
| <i>u</i> <sub>1812</sub> | H(121)...C(131)  | 697.3(30)  | 34.5(fixed)  | — | -12.6 | 34.5  |
| <i>u</i> <sub>1714</sub> | H(17)...C(35)    | 697.4(55)  | 49.4(fixed)  | — | -2.0  | 49.4  |
| <i>u</i> <sub>1900</sub> | H(29)...H(54)    | 697.4(51)  | 77.5(fixed)  | — | -14.4 | 77.5  |
| <i>u</i> <sub>1852</sub> | H(12)...C(19)    | 697.8(25)  | 41.0(fixed)  | — | -27.0 | 41.0  |
| <i>u</i> <sub>1784</sub> | Si(116)...H(148) | 698.0(43)  | 33.2(fixed)  | — | -5.5  | 33.2  |
| <i>u</i> <sub>1912</sub> | C(119)...H(161)  | 698.3(54)  | 55.2(fixed)  | — | -12.2 | 55.2  |
| <i>u</i> <sub>1636</sub> | H(66)...H(77)    | 698.9(27)  | 49.0(fixed)  | — | -4.8  | 49.0  |
| <i>u</i> <sub>1604</sub> | H(72)...H(86)    | 698.9(31)  | 50.7(fixed)  | — | -9.2  | 50.7  |
| <i>u</i> <sub>1887</sub> | H(80)...H(109)   | 699.3(76)  | 59.5(fixed)  | — | -0.5  | 59.5  |
| <i>u</i> <sub>1780</sub> | H(10)...H(20)    | 699.4(30)  | 59.9(fixed)  | — | -12.8 | 59.9  |
| <i>u</i> <sub>1213</sub> | H(64)...H(104)   | 699.6(82)  | 96.6(fixed)  | — | 5.6   | 96.6  |
| <i>u</i> <sub>1857</sub> | Si(115)...H(146) | 699.7(59)  | 37.7(fixed)  | — | -4.5  | 37.7  |
| <i>u</i> <sub>1914</sub> | H(21)...H(53)    | 700.2(78)  | 119.6(fixed) | — | -23.1 | 119.6 |
| <i>u</i> <sub>2033</sub> | C(63)...H(96)    | 700.9(179) | 57.5(fixed)  | — | -17.3 | 57.5  |
| <i>u</i> <sub>1741</sub> | Si(3)...H(42)    | 701.3(36)  | 28.5(fixed)  | — | -5.7  | 28.5  |
| <i>u</i> <sub>1814</sub> | H(129)...C(131)  | 701.4(26)  | 30.7(fixed)  | — | -7.6  | 30.7  |
| <i>u</i> <sub>1764</sub> | H(10)...H(41)    | 701.4(42)  | 77.4(fixed)  | — | -2.0  | 77.4  |
| <i>u</i> <sub>1667</sub> | C(63)...H(78)    | 701.4(31)  | 37.2(fixed)  | — | -5.6  | 37.2  |
| <i>u</i> <sub>1698</sub> | H(140)...H(167)  | 701.6(32)  | 32.9(fixed)  | — | -10.9 | 32.9  |
| <i>u</i> <sub>1799</sub> | C(31)...H(50)    | 701.9(28)  | 32.3(fixed)  | — | -4.2  | 32.3  |
| <i>u</i> <sub>1470</sub> | H(74)...H(101)   | 701.9(192) | 79.9(fixed)  | — | -1.3  | 79.9  |
| <i>u</i> <sub>1879</sub> | H(73)...H(110)   | 702.0(53)  | 51.2(fixed)  | — | -1.3  | 51.2  |
| <i>u</i> <sub>2118</sub> | H(81)...H(109)   | 702.0(128) | 48.0(fixed)  | — | -9.4  | 48.0  |
| <i>u</i> <sub>1823</sub> | H(13)...H(22)    | 702.0(41)  | 69.6(fixed)  | — | -20.1 | 69.6  |
| <i>u</i> <sub>1905</sub> | H(69)...C(95)    | 702.1(104) | 63.3(fixed)  | — | -11.6 | 63.3  |
| <i>u</i> <sub>1840</sub> | H(128)...H(161)  | 702.2(85)  | 75.6(fixed)  | — | -13.7 | 75.6  |
| <i>u</i> <sub>1844</sub> | H(129)...H(132)  | 702.3(39)  | 44.9(fixed)  | — | -4.9  | 44.9  |
| <i>u</i> <sub>1772</sub> | H(8)...C(19)     | 702.4(17)  | 35.1(fixed)  | — | -12.2 | 35.1  |
| <i>u</i> <sub>1713</sub> | C(127)...H(133)  | 702.5(20)  | 43.1(fixed)  | — | -5.7  | 43.1  |
| <i>u</i> <sub>1809</sub> | H(98)...H(101)   | 702.6(35)  | 42.9(fixed)  | — | -2.6  | 42.9  |
| <i>u</i> <sub>1899</sub> | Si(3)...H(48)    | 702.7(35)  | 40.9(fixed)  | — | -24.4 | 40.9  |
| <i>u</i> <sub>1734</sub> | C(127)...H(138)  | 702.9(29)  | 28.9(fixed)  | — | -9.2  | 28.9  |
| <i>u</i> <sub>1569</sub> | H(16)...H(44)    | 702.9(79)  | 97.4(fixed)  | — | 19.6  | 97.4  |
| <i>u</i> <sub>1853</sub> | C(127)...H(140)  | 703.1(31)  | 41.9(fixed)  | — | -11.0 | 41.9  |
| <i>u</i> <sub>1915</sub> | C(63)...H(93)    | 703.1(89)  | 70.6(fixed)  | — | -6.2  | 70.6  |
| <i>u</i> <sub>1850</sub> | H(25)...H(54)    | 703.2(44)  | 119.6(fixed) | — | 6.3   | 119.6 |
| <i>u</i> <sub>1677</sub> | H(77)...H(105)   | 703.8(48)  | 58.7(fixed)  | — | -0.8  | 58.7  |

|                          |                  |            |                                         |   |       |      |
|--------------------------|------------------|------------|-----------------------------------------|---|-------|------|
| <i>u</i> <sub>1675</sub> | H(128)...H(133)  | 704.1(35)  | 60.2(fixed)                             | — | -0.8  | 60.2 |
| <i>u</i> <sub>2019</sub> | H(121)...H(160)  | 704.3(75)  | 58.0(fixed)                             | — | -12.6 | 58.0 |
| <i>u</i> <sub>1756</sub> | H(9)...C(27)     | 704.4(38)  | 59.1(fixed)                             | — | -6.9  | 59.1 |
| <i>u</i> <sub>1828</sub> | H(132)...H(160)  | 704.5(66)  | 67.4(fixed)                             | — | 2.3   | 67.4 |
| <i>u</i> <sub>1866</sub> | C(23)...H(36)    | 704.6(81)  | 60.9(fixed)                             | — | 2.2   | 60.9 |
| <i>u</i> <sub>1813</sub> | H(17)...H(37)    | 704.8(56)  | 80.9(fixed)                             | — | -4.6  | 80.9 |
| <i>u</i> <sub>1758</sub> | H(8)...H(20)     | 704.9(27)  | 48.5(fixed)                             | — | -10.2 | 48.5 |
| <i>u</i> <sub>1766</sub> | Si(116)...H(149) | 704.9(61)  | 30.6(fixed)                             | — | -5.8  | 30.6 |
| <i>u</i> <sub>1829</sub> | H(18)...H(37)    | 705.2(70)  | 81.9(fixed)                             | — | -3.8  | 81.9 |
| <i>u</i> <sub>1654</sub> | H(78)...H(111)   | 705.3(43)  | 29.5(fixed)                             | — | -9.3  | 29.5 |
| <i>u</i> <sub>1934</sub> | H(69)...H(97)    | 705.5(120) | 83.6(fixed)                             | — | -13.5 | 83.6 |
| <i>u</i> <sub>2058</sub> | H(132)...H(158)  | 706.5(192) | 77.1(fixed)                             | — | -12.5 | 77.1 |
| <i>u</i> <sub>1916</sub> | C(63)...H(109)   | 706.9(119) | 55.0(fixed)                             | — | -7.6  | 55.0 |
| <i>u</i> <sub>1821</sub> | H(8)...H(21)     | 707.0(27)  | 50.9(fixed)                             | — | -13.9 | 50.9 |
| <i>u</i> <sub>2040</sub> | H(65)...H(110)   | 707.1(181) | 63.6(fixed)                             | — | -9.9  | 63.6 |
| <i>u</i> <sub>1665</sub> | Si(116)...H(161) | 707.1(55)  | 46.7(fixed)                             | — | -2.3  | 46.7 |
| <i>u</i> <sub>1773</sub> | H(73)...C(75)    | 708.3(24)  | 32.0(fixed)                             | — | -4.1  | 32.0 |
| <i>u</i> <sub>1825</sub> | C(127)...H(132)  | 708.3(23)  | 34.3(fixed)                             | — | -7.8  | 34.3 |
| <i>u</i> <sub>1855</sub> | H(128)...H(162)  | 708.4(129) | 74.3(fixed)                             | — | -12.4 | 74.3 |
| <i>u</i> <sub>1932</sub> | C(19)...H(53)    | 708.5(61)  | 94.8(fixed)                             | — | -24.5 | 94.8 |
| <i>u</i> <sub>1796</sub> | C(131)...H(161)  | 708.5(66)  | 67.9(fixed)                             | — | 4.9   | 67.9 |
| <i>u</i> <sub>1851</sub> | H(122)...H(154)  | 708.6(52)  | 51.0(fixed)                             | — | 2.6   | 51.0 |
| <i>u</i> <sub>1782</sub> | H(10)...C(39)    | 708.6(58)  | 64.4(fixed)                             | — | -6.9  | 64.4 |
| <i>u</i> <sub>1865</sub> | C(11)...H(52)    | 708.8(101) | 51.9(fixed)                             | — | -2.9  | 51.9 |
| <i>u</i> <sub>1732</sub> | H(128)...C(131)  | 709.0(23)  | 40.0(fixed)                             | — | -5.9  | 40.0 |
| <i>u</i> <sub>1953</sub> | C(27)...C(51)    | 709.1(45)  | 80.0(tied to <i>u</i> <sub>1181</sub> ) | — | -20.1 | 66.1 |
| <i>u</i> <sub>1586</sub> | H(74)...C(83)    | 709.9(36)  | 34.4(fixed)                             | — | -5.5  | 34.4 |
| <i>u</i> <sub>1931</sub> | C(63)...C(87)    | 710.1(60)  | 43.9(tied to <i>u</i> <sub>1181</sub> ) | — | -11.5 | 36.3 |
| <i>u</i> <sub>1788</sub> | H(13)...H(44)    | 710.4(63)  | 83.4(fixed)                             | — | -10.1 | 83.4 |
| <i>u</i> <sub>1532</sub> | C(135)...H(165)  | 710.6(99)  | 67.3(fixed)                             | — | -3.0  | 67.3 |
| <i>u</i> <sub>1826</sub> | Si(4)...H(41)    | 710.7(35)  | 43.6(fixed)                             | — | -9.6  | 43.6 |
| <i>u</i> <sub>1360</sub> | Si(59)...H(104)  | 710.9(45)  | 52.0(fixed)                             | — | 2.7   | 52.0 |
| <i>u</i> <sub>2002</sub> | C(67)...H(96)    | 711.0(144) | 73.0(fixed)                             | — | -14.4 | 73.0 |
| <i>u</i> <sub>1615</sub> | H(126)...C(151)  | 711.1(98)  | 58.6(fixed)                             | — | 5.2   | 58.6 |
| <i>u</i> <sub>1805</sub> | Si(6)...C(23)    | 711.4(31)  | 47.4(tied to <i>u</i> <sub>1181</sub> ) | — | -15.8 | 39.2 |
| <i>u</i> <sub>2082</sub> | C(67)...H(110)   | 711.6(92)  | 44.4(fixed)                             | — | -3.7  | 44.4 |
| <i>u</i> <sub>2011</sub> | H(29)...H(53)    | 711.7(74)  | 93.8(fixed)                             | — | -19.1 | 93.8 |
| <i>u</i> <sub>1884</sub> | H(64)...H(89)    | 712.4(40)  | 59.0(fixed)                             | — | -6.3  | 59.0 |
| <i>u</i> <sub>1885</sub> | H(72)...H(76)    | 712.4(35)  | 42.9(fixed)                             | — | -6.9  | 42.9 |
| <i>u</i> <sub>1719</sub> | H(124)...C(131)  | 712.7(30)  | 38.8(fixed)                             | — | -11.4 | 38.8 |
| <i>u</i> <sub>1678</sub> | Si(60)...H(104)  | 712.8(44)  | 33.1(fixed)                             | — | -2.2  | 33.1 |
| <i>u</i> <sub>2016</sub> | H(120)...H(160)  | 712.9(74)  | 48.9(fixed)                             | — | -15.5 | 48.9 |
| <i>u</i> <sub>1755</sub> | C(11)...H(44)    | 713.0(62)  | 81.9(fixed)                             | — | -5.5  | 81.9 |
| <i>u</i> <sub>1860</sub> | H(129)...H(133)  | 713.0(29)  | 45.2(fixed)                             | — | -7.9  | 45.2 |
| <i>u</i> <sub>1837</sub> | C(119)...H(154)  | 713.1(42)  | 43.5(fixed)                             | — | 2.5   | 43.5 |
| <i>u</i> <sub>1760</sub> | Si(4)...H(48)    | 713.2(39)  | 73.3(fixed)                             | — | -12.2 | 73.3 |

|                          |                  |            |                                         |   |       |       |
|--------------------------|------------------|------------|-----------------------------------------|---|-------|-------|
| <i>u</i> <sub>1919</sub> | H(82)...H(111)   | 713.4(47)  | 21.6(fixed)                             | — | -11.0 | 21.6  |
| <i>u</i> <sub>1817</sub> | C(83)...H(98)    | 713.5(44)  | 47.1(fixed)                             | — | -0.4  | 47.1  |
| <i>u</i> <sub>1722</sub> | C(15)...C(43)    | 714.2(67)  | 92.2(tied to <i>u</i> <sub>1181</sub> ) | — | -1.7  | 76.2  |
| <i>u</i> <sub>2029</sub> | H(120)...H(146)  | 714.8(138) | 67.2(fixed)                             | — | -2.3  | 67.2  |
| <i>u</i> <sub>1528</sub> | H(137)...C(163)  | 715.0(101) | 74.4(fixed)                             | — | 1.9   | 74.4  |
| <i>u</i> <sub>1967</sub> | H(121)...H(132)  | 715.6(44)  | 39.4(fixed)                             | — | -14.3 | 39.4  |
| <i>u</i> <sub>1968</sub> | H(18)...H(20)    | 715.7(29)  | 48.8(fixed)                             | — | -33.3 | 48.8  |
| <i>u</i> <sub>1859</sub> | Si(4)...H(38)    | 716.1(61)  | 39.7(fixed)                             | — | -8.6  | 39.7  |
| <i>u</i> <sub>1803</sub> | C(71)...H(76)    | 716.1(19)  | 32.6(fixed)                             | — | -5.2  | 32.6  |
| <i>u</i> <sub>1988</sub> | H(130)...H(162)  | 716.2(133) | 65.7(fixed)                             | — | -11.9 | 65.7  |
| <i>u</i> <sub>1779</sub> | H(9)...H(33)     | 716.3(126) | 56.6(fixed)                             | — | -11.4 | 56.6  |
| <i>u</i> <sub>1994</sub> | C(119)...H(146)  | 716.5(125) | 55.4(fixed)                             | — | -1.5  | 55.4  |
| <i>u</i> <sub>1972</sub> | H(124)...H(158)  | 716.7(129) | 56.7(fixed)                             | — | 0.7   | 56.7  |
| <i>u</i> <sub>1894</sub> | C(131)...C(159)  | 716.8(79)  | 61.7(tied to <i>u</i> <sub>1181</sub> ) | — | -3.9  | 51.0  |
| <i>u</i> <sub>1863</sub> | Si(60)...H(106)  | 717.6(60)  | 28.5(fixed)                             | — | -2.9  | 28.5  |
| <i>u</i> <sub>1834</sub> | Si(3)...H(40)    | 717.8(43)  | 30.3(fixed)                             | — | -4.8  | 30.3  |
| <i>u</i> <sub>1997</sub> | C(27)...H(53)    | 717.9(54)  | 77.6(fixed)                             | — | -21.9 | 77.6  |
| <i>u</i> <sub>1777</sub> | H(10)...H(33)    | 717.9(100) | 52.9(fixed)                             | — | -14.5 | 52.9  |
| <i>u</i> <sub>1995</sub> | C(71)...H(110)   | 718.5(53)  | 41.3(fixed)                             | — | -6.3  | 41.3  |
| <i>u</i> <sub>1573</sub> | H(77)...H(97)    | 718.8(141) | 65.4(fixed)                             | — | -8.8  | 65.4  |
| <i>u</i> <sub>1820</sub> | H(74)...H(100)   | 718.9(197) | 72.1(fixed)                             | — | -8.9  | 72.1  |
| <i>u</i> <sub>1977</sub> | C(119)...C(143)  | 719.1(108) | 42.3(tied to <i>u</i> <sub>2165</sub> ) | — | -2.0  | 43.0  |
| <i>u</i> <sub>2014</sub> | H(74)...H(82)    | 719.3(38)  | 43.5(fixed)                             | — | -13.8 | 43.5  |
| <i>u</i> <sub>1881</sub> | Si(118)...H(124) | 719.5(73)  | 33.7(fixed)                             | — | -5.5  | 33.7  |
| <i>u</i> <sub>1729</sub> | Si(60)...H(96)   | 719.8(76)  | 46.3(fixed)                             | — | -9.7  | 46.3  |
| <i>u</i> <sub>2044</sub> | C(131)...H(157)  | 719.9(118) | 50.4(fixed)                             | — | -15.6 | 50.4  |
| <i>u</i> <sub>1862</sub> | H(9)...H(30)     | 720.1(47)  | 83.3(fixed)                             | — | -14.9 | 83.3  |
| <i>u</i> <sub>1856</sub> | H(120)...H(154)  | 720.2(69)  | 53.4(fixed)                             | — | 5.1   | 53.4  |
| <i>u</i> <sub>1898</sub> | C(63)...H(108)   | 720.5(175) | 68.3(fixed)                             | — | -5.3  | 68.3  |
| <i>u</i> <sub>1870</sub> | H(129)...H(140)  | 720.5(38)  | 52.9(fixed)                             | — | -8.2  | 52.9  |
| <i>u</i> <sub>1761</sub> | Si(60)...C(91)   | 720.8(57)  | 40.0(tied to <i>u</i> <sub>1181</sub> ) | — | -6.8  | 33.0  |
| <i>u</i> <sub>2010</sub> | H(120)...H(162)  | 721.2(66)  | 65.6(fixed)                             | — | -11.7 | 65.6  |
| <i>u</i> <sub>2041</sub> | H(121)...H(162)  | 721.4(77)  | 70.3(fixed)                             | — | -10.3 | 70.3  |
| <i>u</i> <sub>1873</sub> | H(20)...H(52)    | 721.5(98)  | 98.3(fixed)                             | — | -3.3  | 98.3  |
| <i>u</i> <sub>1872</sub> | H(128)...H(138)  | 722.2(36)  | 35.6(fixed)                             | — | -10.2 | 35.6  |
| <i>u</i> <sub>1937</sub> | Si(4)...H(52)    | 722.2(46)  | 69.7(fixed)                             | — | -16.9 | 69.7  |
| <i>u</i> <sub>1989</sub> | H(25)...C(35)    | 722.3(81)  | 71.2(fixed)                             | — | -4.5  | 71.2  |
| <i>u</i> <sub>1978</sub> | C(63)...C(91)    | 722.8(76)  | 63.3(tied to <i>u</i> <sub>1181</sub> ) | — | -11.3 | 52.3  |
| <i>u</i> <sub>1946</sub> | H(24)...C(51)    | 722.9(44)  | 122.0(fixed)                            | — | -8.1  | 122.0 |
| <i>u</i> <sub>1980</sub> | H(12)...H(21)    | 723.4(31)  | 49.1(fixed)                             | — | -32.8 | 49.1  |
| <i>u</i> <sub>1922</sub> | Si(59)...H(92)   | 723.6(49)  | 36.6(fixed)                             | — | -11.8 | 36.6  |
| <i>u</i> <sub>1974</sub> | H(73)...H(82)    | 723.6(26)  | 36.9(fixed)                             | — | -14.6 | 36.9  |
| <i>u</i> <sub>1952</sub> | H(132)...H(162)  | 723.6(123) | 78.1(fixed)                             | — | 1.4   | 78.1  |
| <i>u</i> <sub>1638</sub> | C(123)...H(153)  | 723.7(98)  | 70.6(fixed)                             | — | 2.0   | 70.6  |
| <i>u</i> <sub>1598</sub> | C(19)...H(48)    | 724.4(92)  | 108.3(fixed)                            | — | 11.0  | 108.3 |
| <i>u</i> <sub>1943</sub> | H(16)...H(37)    | 724.4(69)  | 69.7(fixed)                             | — | -11.4 | 69.7  |

|                          |                  |            |                                          |   |       |       |
|--------------------------|------------------|------------|------------------------------------------|---|-------|-------|
| <i>u</i> <sub>1835</sub> | C(7)...H(40)     | 724.5(73)  | 51.3(fixed)                              | — | -1.9  | 51.3  |
| <i>u</i> <sub>1976</sub> | H(133)...H(161)  | 724.7(65)  | 80.7(fixed)                              | — | -2.1  | 80.7  |
| <i>u</i> <sub>2111</sub> | H(82)...H(108)   | 724.7(119) | 56.7(fixed)                              | — | -3.2  | 56.7  |
| <i>u</i> <sub>1882</sub> | C(15)...H(38)    | 725.3(63)  | 52.6(fixed)                              | — | -5.8  | 52.6  |
| <i>u</i> <sub>1659</sub> | H(20)...H(49)    | 725.8(78)  | 94.2(fixed)                              | — | 8.8   | 94.2  |
| <i>u</i> <sub>1793</sub> | H(72)...H(100)   | 725.9(130) | 61.3(fixed)                              | — | -10.7 | 61.3  |
| <i>u</i> <sub>1300</sub> | H(78)...H(102)   | 726.5(208) | 82.4(fixed)                              | — | -1.5  | 82.4  |
| <i>u</i> <sub>1440</sub> | H(80)...C(95)    | 726.7(60)  | 66.4(fixed)                              | — | 2.8   | 66.4  |
| <i>u</i> <sub>1875</sub> | H(33)...H(50)    | 727.6(34)  | 43.8(fixed)                              | — | -3.8  | 43.8  |
| <i>u</i> <sub>1787</sub> | Si(60)...H(92)   | 727.7(65)  | 45.7(fixed)                              | — | -3.9  | 45.7  |
| <i>u</i> <sub>1797</sub> | H(73)...H(76)    | 727.8(29)  | 45.2(fixed)                              | — | -1.5  | 45.2  |
| <i>u</i> <sub>1693</sub> | Si(61)...H(81)   | 727.8(23)  | 46.3(fixed)                              | — | -7.1  | 46.3  |
| <i>u</i> <sub>1806</sub> | H(65)...C(75)    | 727.9(25)  | 33.5(fixed)                              | — | -8.8  | 33.5  |
| <i>u</i> <sub>1838</sub> | H(128)...H(132)  | 729.3(29)  | 50.9(fixed)                              | — | -6.2  | 50.9  |
| <i>u</i> <sub>1676</sub> | H(124)...H(133)  | 729.3(41)  | 60.5(fixed)                              | — | -7.9  | 60.5  |
| <i>u</i> <sub>1646</sub> | H(21)...H(48)    | 729.4(113) | 138.1(fixed)                             | — | 0.7   | 138.1 |
| <i>u</i> <sub>2000</sub> | H(40)...H(46)    | 729.7(39)  | 54.7(fixed)                              | — | -24.6 | 54.7  |
| <i>u</i> <sub>1908</sub> | H(78)...H(102)   | 729.8(206) | 46.7(fixed)                              | — | -4.5  | 46.7  |
| <i>u</i> <sub>2098</sub> | H(24)...H(53)    | 729.9(63)  | 145.0(fixed)                             | — | -25.3 | 145.0 |
| <i>u</i> <sub>2001</sub> | H(18)...H(22)    | 729.9(39)  | 53.4(fixed)                              | — | -24.6 | 53.4  |
| <i>u</i> <sub>1861</sub> | C(7)...H(42)     | 730.1(51)  | 42.4(fixed)                              | — | -5.9  | 42.4  |
| <i>u</i> <sub>1824</sub> | H(17)...H(45)    | 730.5(83)  | 121.1(fixed)                             | — | -10.0 | 121.1 |
| <i>u</i> <sub>1890</sub> | C(19)...H(36)    | 730.5(58)  | 62.3(fixed)                              | — | -11.4 | 62.3  |
| <i>u</i> <sub>2173</sub> | H(81)...H(108)   | 730.7(134) | 46.9(fixed)                              | — | -10.4 | 46.9  |
| <i>u</i> <sub>1878</sub> | Si(116)...H(160) | 730.8(46)  | 31.2(fixed)                              | — | -10.2 | 31.2  |
| <i>u</i> <sub>1961</sub> | H(12)...H(20)    | 730.8(27)  | 55.8(fixed)                              | — | -32.0 | 55.8  |
| <i>u</i> <sub>1886</sub> | C(7)...H(28)     | 731.3(29)  | 42.2(fixed)                              | — | -10.3 | 42.2  |
| <i>u</i> <sub>1767</sub> | H(66)...H(78)    | 731.6(39)  | 53.4(fixed)                              | — | -6.9  | 53.4  |
| <i>u</i> <sub>1775</sub> | C(71)...H(84)    | 731.9(27)  | 29.2(fixed)                              | — | -11.3 | 29.2  |
| <i>u</i> <sub>1712</sub> | C(19)...C(47)    | 732.6(73)  | 86.2(tied to <i>u</i> <sub>1181</sub> )  | — | 1.5   | 71.2  |
| <i>u</i> <sub>1792</sub> | Si(115)...H(149) | 732.6(50)  | 44.0(fixed)                              | — | -2.9  | 44.0  |
| <i>u</i> <sub>1399</sub> | C(67)...H(101)   | 732.6(110) | 72.3(fixed)                              | — | 0.3   | 72.3  |
| <i>u</i> <sub>1633</sub> | H(74)...H(86)    | 732.9(45)  | 59.6(fixed)                              | — | -6.1  | 59.6  |
| <i>u</i> <sub>1982</sub> | Si(3)...H(50)    | 732.9(51)  | 45.8(fixed)                              | — | -17.9 | 45.8  |
| <i>u</i> <sub>1781</sub> | C(123)...C(151)  | 733.1(67)  | 53.5(tied to <i>u</i> <sub>1181</sub> )  | — | -1.0  | 44.2  |
| <i>u</i> <sub>1983</sub> | Si(59)...H(108)  | 733.4(86)  | 37.6(fixed)                              | — | -9.8  | 37.6  |
| <i>u</i> <sub>1733</sub> | H(73)...H(102)   | 733.4(150) | 69.2(fixed)                              | — | -5.0  | 69.2  |
| <i>u</i> <sub>2007</sub> | C(23)...C(51)    | 733.5(39)  | 115.8(tied to <i>u</i> <sub>1181</sub> ) | — | -15.2 | 95.7  |
| <i>u</i> <sub>1848</sub> | Si(115)...C(147) | 733.9(27)  | 31.3(tied to <i>u</i> <sub>1181</sub> )  | — | -5.9  | 25.9  |
| <i>u</i> <sub>1724</sub> | C(75)...H(106)   | 734.2(85)  | 47.0(fixed)                              | — | 0.0   | 47.0  |
| <i>u</i> <sub>1991</sub> | H(68)...H(78)    | 734.4(43)  | 38.5(fixed)                              | — | -12.6 | 38.5  |
| <i>u</i> <sub>1986</sub> | H(24)...H(36)    | 734.5(71)  | 67.5(fixed)                              | — | -3.3  | 67.5  |
| <i>u</i> <sub>2043</sub> | H(125)...H(158)  | 734.7(73)  | 50.2(fixed)                              | — | -4.8  | 50.2  |
| <i>u</i> <sub>1596</sub> | C(63)...H(105)   | 734.8(58)  | 72.6(fixed)                              | — | -5.9  | 72.6  |
| <i>u</i> <sub>1949</sub> | H(122)...C(151)  | 735.7(36)  | 41.8(fixed)                              | — | -2.2  | 41.8  |
| <i>u</i> <sub>1888</sub> | H(85)...H(98)    | 735.9(42)  | 52.2(fixed)                              | — | 1.9   | 52.2  |

|                          |                  |            |                                         |   |       |       |
|--------------------------|------------------|------------|-----------------------------------------|---|-------|-------|
| <i>u</i> <sub>1361</sub> | H(69)...H(101)   | 736.0(99)  | 84.2(fixed)                             | — | 4.8   | 84.2  |
| <i>u</i> <sub>1854</sub> | C(123)...C(163)  | 736.4(97)  | 83.4(tied to <i>u</i> <sub>1181</sub> ) | — | -7.4  | 68.9  |
| <i>u</i> <sub>1917</sub> | H(9)...C(39)     | 736.5(63)  | 53.8(fixed)                             | — | -4.8  | 53.8  |
| <i>u</i> <sub>2138</sub> | H(70)...H(110)   | 737.0(64)  | 53.6(fixed)                             | — | -4.7  | 53.6  |
| <i>u</i> <sub>1907</sub> | Si(6)...H(18)    | 737.0(46)  | 40.2(fixed)                             | — | -9.0  | 40.2  |
| <i>u</i> <sub>1957</sub> | H(18)...H(52)    | 737.1(90)  | 97.6(fixed)                             | — | 1.1   | 97.6  |
| <i>u</i> <sub>1913</sub> | H(21)...H(52)    | 737.4(102) | 111.8(fixed)                            | — | 0.2   | 111.8 |
| <i>u</i> <sub>1956</sub> | H(9)...H(46)     | 737.5(125) | 106.1(fixed)                            | — | -19.0 | 106.1 |
| <i>u</i> <sub>1901</sub> | Si(115)...H(152) | 738.0(47)  | 31.8(fixed)                             | — | -7.6  | 31.8  |
| <i>u</i> <sub>1955</sub> | Si(4)...H(49)    | 738.0(25)  | 43.4(fixed)                             | — | -22.3 | 43.4  |
| <i>u</i> <sub>1750</sub> | H(68)...H(100)   | 738.6(165) | 79.1(fixed)                             | — | -4.1  | 79.1  |
| <i>u</i> <sub>1721</sub> | H(21)...C(47)    | 739.1(89)  | 101.9(fixed)                            | — | -3.0  | 101.9 |
| <i>u</i> <sub>1795</sub> | H(18)...H(44)    | 739.5(94)  | 117.5(fixed)                            | — | 5.8   | 117.5 |
| <i>u</i> <sub>1923</sub> | H(130)...H(164)  | 739.7(205) | 81.6(fixed)                             | — | -13.7 | 81.6  |
| <i>u</i> <sub>1924</sub> | H(138)...H(167)  | 740.2(25)  | 22.0(fixed)                             | — | -11.0 | 22.0  |
| <i>u</i> <sub>1951</sub> | H(9)...H(41)     | 740.9(49)  | 66.3(fixed)                             | — | -3.1  | 66.3  |
| <i>u</i> <sub>2060</sub> | C(135)...H(157)  | 741.6(72)  | 64.4(fixed)                             | — | -9.6  | 64.4  |
| <i>u</i> <sub>2052</sub> | H(120)...H(161)  | 741.7(58)  | 68.4(fixed)                             | — | -15.2 | 68.4  |
| <i>u</i> <sub>1696</sub> | H(70)...H(100)   | 741.9(103) | 66.7(fixed)                             | — | -5.2  | 66.7  |
| <i>u</i> <sub>1927</sub> | C(19)...C(35)    | 741.9(52)  | 69.3(tied to <i>u</i> <sub>1181</sub> ) | — | -12.0 | 57.3  |
| <i>u</i> <sub>1603</sub> | H(137)...H(165)  | 742.0(108) | 86.1(fixed)                             | — | -5.3  | 86.1  |
| <i>u</i> <sub>1925</sub> | H(18)...H(55)    | 742.1(19)  | 21.4(fixed)                             | — | -11.0 | 21.4  |
| <i>u</i> <sub>1992</sub> | C(63)...H(90)    | 742.5(39)  | 50.3(fixed)                             | — | -12.1 | 50.3  |
| <i>u</i> <sub>1987</sub> | C(71)...C(107)   | 742.6(39)  | 40.3(tied to <i>u</i> <sub>1181</sub> ) | — | -7.9  | 33.3  |
| <i>u</i> <sub>2115</sub> | C(23)...H(53)    | 743.8(56)  | 120.7(fixed)                            | — | -27.6 | 120.7 |
| <i>u</i> <sub>2048</sub> | Si(59)...H(94)   | 744.5(91)  | 40.4(fixed)                             | — | -14.5 | 40.4  |
| <i>u</i> <sub>1933</sub> | H(8)...H(28)     | 745.3(36)  | 46.0(fixed)                             | — | -7.8  | 46.0  |
| <i>u</i> <sub>2096</sub> | H(72)...H(110)   | 745.4(41)  | 56.6(fixed)                             | — | -8.4  | 56.6  |
| <i>u</i> <sub>1751</sub> | H(125)...H(153)  | 745.5(77)  | 84.5(fixed)                             | — | -2.2  | 84.5  |
| <i>u</i> <sub>1321</sub> | H(73)...H(102)   | 745.5(150) | 64.6(fixed)                             | — | 6.3   | 64.6  |
| <i>u</i> <sub>2032</sub> | H(65)...C(107)   | 745.6(157) | 62.6(fixed)                             | — | -11.4 | 62.6  |
| <i>u</i> <sub>1709</sub> | H(81)...H(90)    | 745.8(77)  | 88.5(fixed)                             | — | -9.4  | 88.5  |
| <i>u</i> <sub>2090</sub> | H(130)...H(161)  | 745.9(84)  | 54.7(fixed)                             | — | -18.5 | 54.7  |
| <i>u</i> <sub>1846</sub> | H(128)...H(165)  | 746.0(99)  | 56.3(fixed)                             | — | -14.0 | 56.3  |
| <i>u</i> <sub>2036</sub> | C(23)...C(35)    | 747.1(65)  | 55.9(tied to <i>u</i> <sub>1181</sub> ) | — | -10.8 | 46.2  |
| <i>u</i> <sub>1845</sub> | H(125)...C(151)  | 747.1(47)  | 59.9(fixed)                             | — | -2.0  | 59.9  |
| <i>u</i> <sub>2093</sub> | H(66)...H(94)    | 747.4(106) | 69.0(fixed)                             | — | -10.8 | 69.0  |
| <i>u</i> <sub>1842</sub> | H(136)...C(163)  | 747.5(87)  | 48.3(fixed)                             | — | -10.1 | 48.3  |
| <i>u</i> <sub>1938</sub> | H(121)...H(133)  | 748.0(23)  | 40.1(fixed)                             | — | -14.3 | 40.1  |
| <i>u</i> <sub>1836</sub> | H(126)...H(166)  | 748.2(101) | 85.3(fixed)                             | — | -3.6  | 85.3  |
| <i>u</i> <sub>2053</sub> | H(16)...H(52)    | 748.3(67)  | 102.5(fixed)                            | — | -13.2 | 102.5 |
| <i>u</i> <sub>1833</sub> | H(124)...H(166)  | 748.3(151) | 102.5(fixed)                            | — | 0.5   | 102.5 |
| <i>u</i> <sub>2087</sub> | H(9)...H(50)     | 748.4(96)  | 77.0(fixed)                             | — | -18.5 | 77.0  |
| <i>u</i> <sub>1985</sub> | H(8)...H(26)     | 748.9(24)  | 35.3(fixed)                             | — | -11.2 | 35.3  |
| <i>u</i> <sub>1752</sub> | H(138)...C(163)  | 749.5(117) | 52.2(fixed)                             | — | 0.5   | 52.2  |
| <i>u</i> <sub>2022</sub> | H(122)...H(148)  | 749.6(61)  | 62.1(fixed)                             | — | 1.7   | 62.1  |

|                          |                  |            |                                         |   |       |       |
|--------------------------|------------------|------------|-----------------------------------------|---|-------|-------|
| <i>u</i> <sub>1904</sub> | H(14)...H(44)    | 749.9(51)  | 70.8(fixed)                             | — | -3.0  | 70.8  |
| <i>u</i> <sub>2141</sub> | H(25)...H(53)    | 750.0(64)  | 124.2(fixed)                            | — | -23.8 | 124.2 |
| <i>u</i> <sub>1827</sub> | H(17)...H(46)    | 750.1(84)  | 89.4(fixed)                             | — | 7.4   | 89.4  |
| <i>u</i> <sub>1954</sub> | H(68)...H(76)    | 750.8(29)  | 36.0(fixed)                             | — | -12.2 | 36.0  |
| <i>u</i> <sub>1969</sub> | C(119)...C(151)  | 750.8(27)  | 35.9(tied to <i>u</i> <sub>1181</sub> ) | — | -3.9  | 29.6  |
| <i>u</i> <sub>1939</sub> | H(129)...H(138)  | 751.7(25)  | 35.3(fixed)                             | — | -11.8 | 35.3  |
| <i>u</i> <sub>2039</sub> | H(9)...H(45)     | 752.5(89)  | 107.6(fixed)                            | — | -36.5 | 107.6 |
| <i>u</i> <sub>1910</sub> | H(125)...C(163)  | 752.5(84)  | 77.2(fixed)                             | — | -5.6  | 77.2  |
| <i>u</i> <sub>1757</sub> | H(81)...C(95)    | 752.5(50)  | 62.7(fixed)                             | — | -5.7  | 62.7  |
| <i>u</i> <sub>2124</sub> | C(131)...H(158)  | 752.6(163) | 60.0(fixed)                             | — | -17.0 | 60.0  |
| <i>u</i> <sub>1702</sub> | H(20)...H(50)    | 752.9(92)  | 90.4(fixed)                             | — | 22.1  | 90.4  |
| <i>u</i> <sub>1334</sub> | H(77)...H(102)   | 753.0(184) | 76.3(fixed)                             | — | -6.0  | 76.3  |
| <i>u</i> <sub>1807</sub> | H(22)...H(46)    | 753.1(131) | 91.9(fixed)                             | — | 21.0  | 91.9  |
| <i>u</i> <sub>1935</sub> | Si(115)...H(148) | 753.4(21)  | 39.2(fixed)                             | — | -7.0  | 39.2  |
| <i>u</i> <sub>1903</sub> | H(128)...H(164)  | 753.5(154) | 62.2(fixed)                             | — | -17.1 | 62.2  |
| <i>u</i> <sub>2119</sub> | H(9)...H(48)     | 753.8(69)  | 71.1(fixed)                             | — | -34.5 | 71.1  |
| <i>u</i> <sub>1963</sub> | H(122)...H(153)  | 753.8(40)  | 54.4(fixed)                             | — | -3.5  | 54.4  |
| <i>u</i> <sub>1304</sub> | H(77)...H(101)   | 754.1(150) | 69.4(fixed)                             | — | -7.6  | 69.4  |
| <i>u</i> <sub>2051</sub> | H(126)...H(158)  | 754.2(119) | 48.1(fixed)                             | — | -6.0  | 48.1  |
| <i>u</i> <sub>2037</sub> | H(78)...H(105)   | 754.3(76)  | 46.7(fixed)                             | — | -6.4  | 46.7  |
| <i>u</i> <sub>1930</sub> | H(73)...H(84)    | 754.7(31)  | 33.0(fixed)                             | — | -12.7 | 33.0  |
| <i>u</i> <sub>1738</sub> | C(75)...H(104)   | 755.2(61)  | 44.0(fixed)                             | — | -3.8  | 44.0  |
| <i>u</i> <sub>1998</sub> | C(19)...H(52)    | 756.2(86)  | 88.8(fixed)                             | — | -9.6  | 88.8  |
| <i>u</i> <sub>2091</sub> | H(64)...H(93)    | 756.2(77)  | 74.5(fixed)                             | — | -12.7 | 74.5  |
| <i>u</i> <sub>1999</sub> | H(28)...C(43)    | 756.5(86)  | 87.5(fixed)                             | — | -9.6  | 87.5  |
| <i>u</i> <sub>2139</sub> | H(133)...H(157)  | 756.5(91)  | 55.4(fixed)                             | — | -16.6 | 55.4  |
| <i>u</i> <sub>2026</sub> | H(128)...H(140)  | 756.6(25)  | 37.4(fixed)                             | — | -14.8 | 37.4  |
| <i>u</i> <sub>1874</sub> | H(128)...H(152)  | 756.6(156) | 60.3(fixed)                             | — | 0.1   | 60.3  |
| <i>u</i> <sub>2083</sub> | H(25)...C(51)    | 756.9(41)  | 95.1(fixed)                             | — | -15.6 | 95.1  |
| <i>u</i> <sub>2015</sub> | H(121)...H(134)  | 757.5(35)  | 44.8(fixed)                             | — | -15.1 | 44.8  |
| <i>u</i> <sub>1979</sub> | H(18)...H(38)    | 757.9(73)  | 62.0(fixed)                             | — | -2.9  | 62.0  |
| <i>u</i> <sub>2190</sub> | H(65)...H(96)    | 758.1(218) | 70.2(fixed)                             | — | -21.9 | 70.2  |
| <i>u</i> <sub>2073</sub> | H(80)...H(108)   | 758.3(81)  | 57.7(fixed)                             | — | -6.0  | 57.7  |
| <i>u</i> <sub>1847</sub> | H(136)...H(165)  | 759.2(89)  | 64.3(fixed)                             | — | -11.7 | 64.3  |
| <i>u</i> <sub>2005</sub> | H(65)...H(77)    | 759.2(25)  | 31.8(fixed)                             | — | -11.7 | 31.8  |
| <i>u</i> <sub>2013</sub> | H(9)...H(26)     | 759.6(34)  | 41.2(fixed)                             | — | -4.2  | 41.2  |
| <i>u</i> <sub>2172</sub> | C(79)...H(102)   | 760.0(73)  | 22.4(fixed)                             | — | -5.5  | 22.4  |
| <i>u</i> <sub>1592</sub> | H(77)...H(102)   | 760.1(183) | 55.2(fixed)                             | — | -2.5  | 55.2  |
| <i>u</i> <sub>1705</sub> | H(141)...H(162)  | 760.3(114) | 71.3(fixed)                             | — | 0.1   | 71.3  |
| <i>u</i> <sub>2054</sub> | H(122)...C(147)  | 760.3(46)  | 50.5(fixed)                             | — | -1.9  | 50.5  |
| <i>u</i> <sub>1704</sub> | H(138)...H(165)  | 760.3(114) | 71.2(fixed)                             | — | 0.1   | 71.2  |
| <i>u</i> <sub>1947</sub> | Si(60)...H(93)   | 760.4(37)  | 31.3(fixed)                             | — | -10.1 | 31.3  |
| <i>u</i> <sub>1384</sub> | H(65)...H(104)   | 761.0(85)  | 90.6(fixed)                             | — | 5.3   | 90.6  |
| <i>u</i> <sub>2171</sub> | H(68)...H(96)    | 761.1(185) | 86.2(fixed)                             | — | -20.0 | 86.2  |
| <i>u</i> <sub>2088</sub> | H(130)...H(140)  | 761.2(38)  | 52.3(fixed)                             | — | -14.4 | 52.3  |
| <i>u</i> <sub>1920</sub> | H(16)...C(43)    | 761.2(62)  | 75.3(fixed)                             | — | -1.9  | 75.3  |

|                          |                  |            |                                         |   |       |       |
|--------------------------|------------------|------------|-----------------------------------------|---|-------|-------|
| <i>u</i> <sub>2006</sub> | H(129)...H(152)  | 761.3(107) | 50.8(fixed)                             | — | -4.6  | 50.8  |
| <i>u</i> <sub>1960</sub> | C(15)...H(45)    | 761.4(68)  | 104.9(fixed)                            | — | -16.6 | 104.9 |
| <i>u</i> <sub>2129</sub> | H(69)...C(107)   | 761.4(96)  | 50.5(fixed)                             | — | -5.6  | 50.5  |
| <i>u</i> <sub>1642</sub> | H(64)...H(106)   | 761.4(121) | 97.3(fixed)                             | — | -2.2  | 97.3  |
| <i>u</i> <sub>2057</sub> | H(9)...H(21)     | 761.6(33)  | 55.3(fixed)                             | — | -21.7 | 55.3  |
| <i>u</i> <sub>2020</sub> | H(64)...H(90)    | 761.7(61)  | 68.4(fixed)                             | — | -11.1 | 68.4  |
| <i>u</i> <sub>2063</sub> | C(63)...H(92)    | 762.4(40)  | 60.4(fixed)                             | — | -11.7 | 60.4  |
| <i>u</i> <sub>2104</sub> | H(74)...H(77)    | 762.5(37)  | 30.8(fixed)                             | — | -10.4 | 30.8  |
| <i>u</i> <sub>2077</sub> | H(12)...H(22)    | 763.1(31)  | 50.7(fixed)                             | — | -27.0 | 50.7  |
| <i>u</i> <sub>2050</sub> | C(131)...H(160)  | 763.8(53)  | 51.0(fixed)                             | — | -8.3  | 51.0  |
| <i>u</i> <sub>1984</sub> | H(124)...H(132)  | 764.1(24)  | 38.6(fixed)                             | — | -16.3 | 38.6  |
| <i>u</i> <sub>1726</sub> | H(72)...H(104)   | 764.3(64)  | 75.1(fixed)                             | — | -6.6  | 75.1  |
| <i>u</i> <sub>1611</sub> | C(63)...H(106)   | 764.6(107) | 78.7(fixed)                             | — | -2.3  | 78.7  |
| <i>u</i> <sub>1959</sub> | C(119)...H(153)  | 764.9(47)  | 50.6(fixed)                             | — | -4.4  | 50.6  |
| <i>u</i> <sub>2089</sub> | H(72)...H(78)    | 765.0(35)  | 35.9(fixed)                             | — | -9.5  | 35.9  |
| <i>u</i> <sub>1964</sub> | H(130)...H(138)  | 765.0(36)  | 37.0(fixed)                             | — | -10.9 | 37.0  |
| <i>u</i> <sub>2042</sub> | H(9)...C(19)     | 765.1(16)  | 28.0(fixed)                             | — | -21.7 | 28.0  |
| <i>u</i> <sub>1965</sub> | Si(116)...H(162) | 765.9(74)  | 31.9(fixed)                             | — | -8.5  | 31.9  |
| <i>u</i> <sub>2080</sub> | C(71)...H(109)   | 765.9(34)  | 40.4(fixed)                             | — | -7.2  | 40.4  |
| <i>u</i> <sub>2059</sub> | H(12)...H(52)    | 766.4(117) | 62.8(fixed)                             | — | -1.9  | 62.8  |
| <i>u</i> <sub>1800</sub> | H(65)...H(76)    | 766.7(30)  | 46.3(fixed)                             | — | -6.7  | 46.3  |
| <i>u</i> <sub>2143</sub> | H(121)...H(161)  | 767.2(63)  | 62.5(fixed)                             | — | -18.0 | 62.5  |
| <i>u</i> <sub>2023</sub> | H(120)...C(151)  | 767.5(51)  | 41.0(fixed)                             | — | -3.8  | 41.0  |
| <i>u</i> <sub>1981</sub> | H(130)...H(165)  | 767.9(144) | 63.0(fixed)                             | — | -15.9 | 63.0  |
| <i>u</i> <sub>1996</sub> | H(10)...H(42)    | 768.3(50)  | 62.1(fixed)                             | — | -11.3 | 62.1  |
| <i>u</i> <sub>2126</sub> | H(65)...H(93)    | 768.9(107) | 81.0(fixed)                             | — | -10.9 | 81.0  |
| <i>u</i> <sub>2064</sub> | H(12)...H(41)    | 769.1(68)  | 58.2(fixed)                             | — | -9.4  | 58.2  |
| <i>u</i> <sub>2061</sub> | C(71)...H(78)    | 769.1(19)  | 19.2(fixed)                             | — | -10.0 | 19.2  |
| <i>u</i> <sub>1926</sub> | H(72)...H(84)    | 769.1(25)  | 36.9(fixed)                             | — | -13.2 | 36.9  |
| <i>u</i> <sub>2025</sub> | H(21)...H(36)    | 769.2(44)  | 65.2(fixed)                             | — | -16.4 | 65.2  |
| <i>u</i> <sub>2100</sub> | H(72)...C(107)   | 770.2(39)  | 50.4(fixed)                             | — | -11.4 | 50.4  |
| <i>u</i> <sub>2097</sub> | H(22)...C(51)    | 771.2(75)  | 89.7(fixed)                             | — | -19.1 | 89.7  |
| <i>u</i> <sub>1971</sub> | H(124)...H(134)  | 771.7(37)  | 45.6(fixed)                             | — | -14.7 | 45.6  |
| <i>u</i> <sub>2069</sub> | H(74)...C(75)    | 771.7(20)  | 18.9(fixed)                             | — | -10.5 | 18.9  |
| <i>u</i> <sub>1739</sub> | H(73)...H(106)   | 771.8(62)  | 68.9(fixed)                             | — | -1.7  | 68.9  |
| <i>u</i> <sub>2112</sub> | H(26)...H(54)    | 771.9(51)  | 127.6(fixed)                            | — | -7.2  | 127.6 |
| <i>u</i> <sub>2167</sub> | H(64)...H(96)    | 772.0(140) | 51.3(fixed)                             | — | -22.3 | 51.3  |
| <i>u</i> <sub>2125</sub> | H(65)...H(89)    | 772.1(82)  | 49.5(fixed)                             | — | -13.4 | 49.5  |
| <i>u</i> <sub>2109</sub> | H(64)...C(91)    | 772.1(57)  | 60.0(fixed)                             | — | -15.6 | 60.0  |
| <i>u</i> <sub>1950</sub> | H(72)...H(105)   | 772.7(72)  | 76.3(fixed)                             | — | -10.8 | 76.3  |
| <i>u</i> <sub>2150</sub> | C(67)...C(107)   | 772.7(73)  | 32.3(tied to <i>u</i> <sub>2165</sub> ) | — | -9.4  | 32.8  |
| <i>u</i> <sub>2056</sub> | C(7)...H(22)     | 773.0(14)  | 25.0(fixed)                             | — | -17.6 | 25.0  |
| <i>u</i> <sub>2110</sub> | H(14)...H(52)    | 773.5(84)  | 53.5(fixed)                             | — | -15.1 | 53.5  |
| <i>u</i> <sub>2021</sub> | H(10)...H(40)    | 773.8(76)  | 68.5(fixed)                             | — | -10.4 | 68.5  |
| <i>u</i> <sub>2092</sub> | Si(115)...H(144) | 774.0(35)  | 30.2(fixed)                             | — | -8.6  | 30.2  |
| <i>u</i> <sub>1990</sub> | H(124)...H(154)  | 775.2(74)  | 53.6(fixed)                             | — | -0.7  | 53.6  |



|                          |                 |            |              |   |       |       |
|--------------------------|-----------------|------------|--------------|---|-------|-------|
| <i>u</i> <sub>2045</sub> | H(10)...H(28)   | 776.3(22)  | 39.0(fixed)  | — | -16.7 | 39.0  |
| <i>u</i> <sub>1966</sub> | C(19)...H(49)   | 776.5(60)  | 76.3(fixed)  | — | -13.7 | 76.3  |
| <i>u</i> <sub>2152</sub> | H(121)...H(145) | 776.5(133) | 58.5(fixed)  | — | -2.6  | 58.5  |
| <i>u</i> <sub>2081</sub> | H(122)...H(149) | 777.3(50)  | 57.7(fixed)  | — | -2.8  | 57.7  |
| <i>u</i> <sub>2149</sub> | H(25)...H(37)   | 778.0(77)  | 71.1(fixed)  | — | -12.4 | 71.1  |
| <i>u</i> <sub>2140</sub> | H(133)...H(160) | 778.4(46)  | 65.7(fixed)  | — | -10.5 | 65.7  |
| <i>u</i> <sub>1918</sub> | C(71)...H(102)  | 779.3(140) | 58.2(fixed)  | — | -11.3 | 58.2  |
| <i>u</i> <sub>1921</sub> | C(135)...H(164) | 779.5(109) | 58.1(fixed)  | — | -5.9  | 58.1  |
| <i>u</i> <sub>2128</sub> | H(72)...H(109)  | 779.6(70)  | 61.4(fixed)  | — | -9.3  | 61.4  |
| <i>u</i> <sub>2062</sub> | C(127)...H(134) | 779.8(11)  | 21.7(fixed)  | — | -14.0 | 21.7  |
| <i>u</i> <sub>2151</sub> | H(28)...H(54)   | 780.6(50)  | 84.1(fixed)  | — | -22.8 | 84.1  |
| <i>u</i> <sub>2055</sub> | H(130)...C(131) | 780.7(11)  | 23.1(fixed)  | — | -13.5 | 23.1  |
| <i>u</i> <sub>2068</sub> | H(17)...H(38)   | 782.0(62)  | 51.4(fixed)  | — | -9.9  | 51.4  |
| <i>u</i> <sub>2047</sub> | H(14)...C(43)   | 782.3(40)  | 54.7(fixed)  | — | -11.4 | 54.7  |
| <i>u</i> <sub>1843</sub> | H(77)...H(106)  | 782.5(93)  | 61.6(fixed)  | — | -3.8  | 61.6  |
| <i>u</i> <sub>2084</sub> | H(33)...H(46)   | 782.7(27)  | 48.8(fixed)  | — | -14.9 | 48.8  |
| <i>u</i> <sub>2127</sub> | H(24)...C(35)   | 782.9(54)  | 50.8(fixed)  | — | -16.8 | 50.8  |
| <i>u</i> <sub>2027</sub> | C(127)...H(152) | 783.2(111) | 40.4(fixed)  | — | -6.3  | 40.4  |
| <i>u</i> <sub>2075</sub> | C(11)...H(45)   | 783.8(41)  | 68.9(fixed)  | — | -19.0 | 68.9  |
| <i>u</i> <sub>2101</sub> | H(9)...H(20)    | 784.2(17)  | 36.6(fixed)  | — | -26.0 | 36.6  |
| <i>u</i> <sub>2159</sub> | H(69)...H(96)   | 784.5(114) | 70.2(fixed)  | — | -20.4 | 70.2  |
| <i>u</i> <sub>2004</sub> | H(21)...H(49)   | 784.7(73)  | 103.5(fixed) | — | -21.5 | 103.5 |
| <i>u</i> <sub>2070</sub> | H(9)...H(40)    | 785.0(83)  | 61.8(fixed)  | — | -4.2  | 61.8  |
| <i>u</i> <sub>1632</sub> | H(68)...H(101)  | 785.2(138) | 84.0(fixed)  | — | -0.4  | 84.0  |
| <i>u</i> <sub>1651</sub> | C(71)...H(102)  | 786.6(140) | 52.1(fixed)  | — | -4.8  | 52.1  |
| <i>u</i> <sub>2009</sub> | C(15)...H(46)   | 787.8(73)  | 75.0(fixed)  | — | -4.7  | 75.0  |
| <i>u</i> <sub>2169</sub> | H(12)...H(49)   | 789.9(89)  | 84.6(fixed)  | — | -8.8  | 84.6  |
| <i>u</i> <sub>2072</sub> | H(134)...H(161) | 790.8(76)  | 76.6(fixed)  | — | 0.1   | 76.6  |
| <i>u</i> <sub>2046</sub> | H(65)...H(78)   | 790.8(31)  | 40.1(fixed)  | — | -11.7 | 40.1  |
| <i>u</i> <sub>2049</sub> | H(120)...H(153) | 791.2(43)  | 58.3(fixed)  | — | -6.1  | 58.3  |
| <i>u</i> <sub>2067</sub> | H(12)...H(44)   | 792.3(73)  | 95.6(fixed)  | — | -11.9 | 95.6  |
| <i>u</i> <sub>1892</sub> | Si(61)...H(82)  | 792.7(51)  | 44.9(fixed)  | — | -8.8  | 44.9  |
| <i>u</i> <sub>2113</sub> | H(129)...H(134) | 792.7(25)  | 31.7(fixed)  | — | -14.1 | 31.7  |
| <i>u</i> <sub>1893</sub> | H(137)...H(164) | 793.0(110) | 86.2(fixed)  | — | -2.4  | 86.2  |
| <i>u</i> <sub>1849</sub> | H(77)...H(104)  | 793.2(58)  | 55.0(fixed)  | — | -6.8  | 55.0  |
| <i>u</i> <sub>2142</sub> | H(26)...H(36)   | 793.5(88)  | 61.6(fixed)  | — | -3.6  | 61.6  |
| <i>u</i> <sub>2028</sub> | H(126)...C(163) | 794.2(81)  | 59.8(fixed)  | — | -11.3 | 59.8  |
| <i>u</i> <sub>2133</sub> | C(131)...H(162) | 794.2(103) | 58.3(fixed)  | — | -9.7  | 58.3  |
| <i>u</i> <sub>2066</sub> | H(130)...H(133) | 794.9(20)  | 45.9(fixed)  | — | -11.4 | 45.9  |
| <i>u</i> <sub>2094</sub> | Si(4)...H(50)   | 795.6(36)  | 40.8(fixed)  | — | -19.9 | 40.8  |
| <i>u</i> <sub>2018</sub> | C(123)...H(165) | 796.8(88)  | 72.0(fixed)  | — | -13.0 | 72.0  |
| <i>u</i> <sub>2107</sub> | H(8)...H(22)    | 797.0(16)  | 33.9(fixed)  | — | -16.9 | 33.9  |
| <i>u</i> <sub>2071</sub> | H(16)...H(45)   | 797.2(67)  | 105.0(fixed) | — | -12.5 | 105.0 |
| <i>u</i> <sub>2102</sub> | H(9)...H(28)    | 797.2(36)  | 57.1(fixed)  | — | -12.7 | 57.1  |
| <i>u</i> <sub>2035</sub> | Si(60)...H(94)  | 797.6(69)  | 40.9(fixed)  | — | -10.5 | 40.9  |
| <i>u</i> <sub>2065</sub> | H(18)...C(43)   | 797.9(74)  | 84.9(fixed)  | — | -11.2 | 84.9  |

|                          |                 |            |                                         |          |       |       |
|--------------------------|-----------------|------------|-----------------------------------------|----------|-------|-------|
| <i>u</i> <sub>1723</sub> | H(70)...H(101)  | 797.9(94)  | 67.2(fixed)                             | —        | -7.4  | 67.2  |
| <i>u</i> <sub>2095</sub> | H(128)...H(134) | 798.1(22)  | 39.6(fixed)                             | —        | -13.3 | 39.6  |
| <i>u</i> <sub>2121</sub> | H(130)...H(132) | 798.1(24)  | 34.2(fixed)                             | —        | -14.8 | 34.2  |
| <i>u</i> <sub>2161</sub> | H(14)...C(47)   | 798.2(59)  | 53.4(fixed)                             | —        | -16.0 | 53.4  |
| <i>u</i> <sub>2182</sub> | H(65)...C(91)   | 798.4(95)  | 60.8(fixed)                             | —        | -17.5 | 60.8  |
| <i>u</i> <sub>2200</sub> | H(70)...C(107)  | 798.7(49)  | 39.3(fixed)                             | —        | -11.3 | 39.3  |
| <i>u</i> <sub>2130</sub> | H(64)...H(92)   | 798.8(37)  | 72.5(fixed)                             | —        | -14.0 | 72.5  |
| <i>u</i> <sub>2145</sub> | H(17)...C(47)   | 798.9(47)  | 65.7(fixed)                             | —        | -25.2 | 65.7  |
| <i>u</i> <sub>2180</sub> | C(63)...H(88)   | 799.0(78)  | 37.0(fixed)                             | —        | -18.4 | 37.0  |
| <i>u</i> <sub>2243</sub> | H(69)...H(109)  | 799.2(88)  | 50.1(fixed)                             | —        | -10.8 | 50.1  |
| <i>u</i> <sub>2184</sub> | H(17)...H(49)   | 799.5(61)  | 96.0(fixed)                             | —        | -30.6 | 96.0  |
| <i>u</i> <sub>2076</sub> | H(124)...C(163) | 799.8(122) | 77.7(fixed)                             | —        | -9.5  | 77.7  |
| <i>u</i> <sub>2195</sub> | C(15)...H(49)   | 799.9(55)  | 82.6(fixed)                             | —        | -27.9 | 82.6  |
| <i>u</i> <sub>1685</sub> | H(74)...H(104)  | 800.2(71)  | 78.0(fixed)                             | —        | 0.2   | 78.0  |
| <i>u</i> <sub>2106</sub> | H(73)...H(78)   | 800.2(22)  | 31.3(fixed)                             | —        | -9.7  | 31.3  |
| <i>u</i> <sub>1993</sub> | H(74)...H(84)   | 801.1(35)  | 36.9(fixed)                             | —        | -12.9 | 36.9  |
| <i>u</i> <sub>2255</sub> | H(68)...H(110)  | 801.3(105) | 49.3(fixed)                             | —        | -10.7 | 49.3  |
| <i>u</i> <sub>2030</sub> | H(78)...H(106)  | 802.1(93)  | 55.7(fixed)                             | —        | -3.3  | 55.7  |
| <i>u</i> <sub>2012</sub> | H(126)...H(152) | 802.9(105) | 63.7(fixed)                             | —        | -2.1  | 63.7  |
| <i>u</i> <sub>2131</sub> | H(134)...C(159) | 803.3(89)  | 58.9(fixed)                             | —        | -9.4  | 58.9  |
| <i>u</i> <sub>2224</sub> | H(133)...H(158) | 804.6(133) | 56.7(fixed)                             | —        | -22.9 | 56.7  |
| <i>u</i> <sub>2239</sub> | C(67)...H(109)  | 805.1(62)  | 34.9(fixed)                             | —        | -12.5 | 34.9  |
| <i>u</i> <sub>2034</sub> | H(125)...H(165) | 805.3(86)  | 83.1(fixed)                             | —        | -10.8 | 83.1  |
| <i>u</i> <sub>1958</sub> | H(22)...H(48)   | 805.5(95)  | 115.9(fixed)                            | —        | 4.7   | 115.9 |
| <i>u</i> <sub>2099</sub> | H(73)...H(108)  | 805.6(56)  | 50.9(fixed)                             | —        | -5.5  | 50.9  |
| <i>u</i> <sub>2117</sub> | H(9)...H(42)    | 806.0(59)  | 49.1(fixed)                             | —        | -11.2 | 49.1  |
| <i>u</i> <sub>2165</sub> | C(15)...C(47)   | 806.1(40)  | 49.2(51)                                | 50.0(50) | -25.7 | 50.0  |
| <i>u</i> <sub>2208</sub> | H(74)...H(110)  | 806.5(72)  | 43.9(fixed)                             | —        | -12.9 | 43.9  |
| <i>u</i> <sub>2114</sub> | C(123)...H(164) | 806.9(108) | 80.5(fixed)                             | —        | -13.5 | 80.5  |
| <i>u</i> <sub>2177</sub> | H(65)...H(109)  | 807.2(120) | 57.7(fixed)                             | —        | -15.2 | 57.7  |
| <i>u</i> <sub>2199</sub> | C(63)...H(94)   | 807.7(97)  | 52.0(fixed)                             | —        | -19.0 | 52.0  |
| <i>u</i> <sub>1970</sub> | H(21)...H(50)   | 808.3(98)  | 100.1(fixed)                            | —        | -0.2  | 100.1 |
| <i>u</i> <sub>2158</sub> | H(24)...H(52)   | 808.3(46)  | 123.7(fixed)                            | —        | -13.1 | 123.7 |
| <i>u</i> <sub>2194</sub> | H(28)...C(51)   | 808.6(45)  | 66.9(fixed)                             | —        | -28.0 | 66.9  |
| <i>u</i> <sub>2192</sub> | H(29)...H(46)   | 808.7(58)  | 89.0(fixed)                             | —        | -34.3 | 89.0  |
| <i>u</i> <sub>2179</sub> | C(123)...H(160) | 809.0(55)  | 49.3(fixed)                             | —        | -11.4 | 49.3  |
| <i>u</i> <sub>2132</sub> | H(121)...H(154) | 809.1(36)  | 44.0(fixed)                             | —        | -2.9  | 44.0  |
| <i>u</i> <sub>2156</sub> | C(119)...H(148) | 810.5(45)  | 46.2(fixed)                             | —        | -6.4  | 46.2  |
| <i>u</i> <sub>2108</sub> | H(74)...H(76)   | 810.5(17)  | 33.5(fixed)                             | —        | -10.2 | 33.5  |
| <i>u</i> <sub>2154</sub> | C(119)...C(147) | 810.6(31)  | 31.3(tied to <i>u</i> <sub>2165</sub> ) | —        | -7.7  | 31.8  |
| <i>u</i> <sub>2218</sub> | H(120)...H(144) | 813.4(131) | 57.8(fixed)                             | —        | -7.1  | 57.8  |
| <i>u</i> <sub>2147</sub> | H(22)...H(36)   | 813.6(69)  | 64.1(fixed)                             | —        | -14.7 | 64.1  |
| <i>u</i> <sub>2123</sub> | H(14)...H(45)   | 813.9(40)  | 71.5(fixed)                             | —        | -14.7 | 71.5  |
| <i>u</i> <sub>2166</sub> | C(123)...C(159) | 814.3(46)  | 26.2(tied to <i>u</i> <sub>2165</sub> ) | —        | -13.0 | 26.6  |
| <i>u</i> <sub>2225</sub> | H(28)...H(53)   | 816.0(51)  | 77.2(fixed)                             | —        | -32.4 | 77.2  |
| <i>u</i> <sub>2164</sub> | H(65)...H(108)  | 816.3(188) | 74.2(fixed)                             | —        | -13.3 | 74.2  |

|                          |                  |            |                                         |   |       |       |
|--------------------------|------------------|------------|-----------------------------------------|---|-------|-------|
| <i>u</i> <sub>2017</sub> | H(124)...H(153)  | 816.5(110) | 70.4(fixed)                             | — | -3.9  | 70.4  |
| <i>u</i> <sub>2270</sub> | H(70)...H(109)   | 818.8(55)  | 46.8(fixed)                             | — | -12.7 | 46.8  |
| <i>u</i> <sub>2214</sub> | C(119)...H(144)  | 819.1(109) | 44.3(fixed)                             | — | -7.9  | 44.3  |
| <i>u</i> <sub>2148</sub> | H(125)...H(164)  | 820.8(91)  | 89.4(fixed)                             | — | -12.0 | 89.4  |
| <i>u</i> <sub>2178</sub> | H(69)...H(102)   | 821.0(112) | 50.8(fixed)                             | — | -8.5  | 50.8  |
| <i>u</i> <sub>1941</sub> | H(69)...H(102)   | 821.7(113) | 78.3(fixed)                             | — | -3.6  | 78.3  |
| <i>u</i> <sub>1940</sub> | H(65)...H(105)   | 821.7(61)  | 81.4(fixed)                             | — | -12.4 | 81.4  |
| <i>u</i> <sub>2078</sub> | H(22)...C(47)    | 822.9(76)  | 77.7(fixed)                             | — | -7.0  | 77.7  |
| <i>u</i> <sub>2205</sub> | C(23)...H(38)    | 823.2(71)  | 55.9(fixed)                             | — | -16.4 | 55.9  |
| <i>u</i> <sub>2155</sub> | C(119)...H(149)  | 823.7(38)  | 43.4(fixed)                             | — | -7.3  | 43.4  |
| <i>u</i> <sub>2135</sub> | Si(115)...H(150) | 824.1(27)  | 26.0(fixed)                             | — | -10.9 | 26.0  |
| <i>u</i> <sub>2233</sub> | H(133)...H(162)  | 824.8(93)  | 68.0(fixed)                             | — | -17.2 | 68.0  |
| <i>u</i> <sub>2202</sub> | H(24)...H(37)    | 824.9(53)  | 61.7(fixed)                             | — | -17.9 | 61.7  |
| <i>u</i> <sub>2157</sub> | C(19)...H(38)    | 825.6(60)  | 66.8(fixed)                             | — | -18.6 | 66.8  |
| <i>u</i> <sub>2160</sub> | H(22)...C(35)    | 826.6(61)  | 56.9(fixed)                             | — | -15.7 | 56.9  |
| <i>u</i> <sub>2262</sub> | H(134)...H(158)  | 827.0(187) | 71.4(fixed)                             | — | -21.7 | 71.4  |
| <i>u</i> <sub>2120</sub> | C(123)...H(152)  | 828.3(69)  | 48.5(fixed)                             | — | -8.5  | 48.5  |
| <i>u</i> <sub>2203</sub> | C(23)...H(52)    | 829.6(39)  | 94.9(fixed)                             | — | -21.9 | 94.9  |
| <i>u</i> <sub>2196</sub> | H(122)...H(152)  | 829.9(48)  | 43.5(fixed)                             | — | -8.6  | 43.5  |
| <i>u</i> <sub>2116</sub> | H(124)...C(151)  | 830.2(73)  | 44.4(fixed)                             | — | -7.5  | 44.4  |
| <i>u</i> <sub>2079</sub> | H(138)...H(164)  | 831.1(134) | 61.3(fixed)                             | — | -4.4  | 61.3  |
| <i>u</i> <sub>2217</sub> | H(26)...C(51)    | 831.1(41)  | 95.2(fixed)                             | — | -23.9 | 95.2  |
| <i>u</i> <sub>2198</sub> | H(74)...C(107)   | 832.4(56)  | 39.1(fixed)                             | — | -14.3 | 39.1  |
| <i>u</i> <sub>2008</sub> | C(67)...H(102)   | 832.5(116) | 63.7(fixed)                             | — | -9.9  | 63.7  |
| <i>u</i> <sub>2170</sub> | C(15)...C(39)    | 832.6(30)  | 22.3(tied to <i>u</i> <sub>2165</sub> ) | — | -9.4  | 22.6  |
| <i>u</i> <sub>2201</sub> | H(126)...H(160)  | 832.8(65)  | 64.4(fixed)                             | — | -9.6  | 64.4  |
| <i>u</i> <sub>2216</sub> | C(11)...H(50)    | 834.2(70)  | 47.3(fixed)                             | — | -15.2 | 47.3  |
| <i>u</i> <sub>2144</sub> | H(16)...H(46)    | 835.6(66)  | 76.0(fixed)                             | — | -7.6  | 76.0  |
| <i>u</i> <sub>2153</sub> | C(67)...H(102)   | 835.7(115) | 39.4(fixed)                             | — | -9.6  | 39.4  |
| <i>u</i> <sub>2221</sub> | H(64)...H(88)    | 835.8(42)  | 48.6(fixed)                             | — | -20.1 | 48.6  |
| <i>u</i> <sub>2146</sub> | H(125)...H(152)  | 836.0(47)  | 64.2(fixed)                             | — | -9.2  | 64.2  |
| <i>u</i> <sub>2136</sub> | H(136)...H(164)  | 836.3(95)  | 56.3(fixed)                             | — | -17.3 | 56.3  |
| <i>u</i> <sub>2085</sub> | H(78)...H(104)   | 836.5(68)  | 50.6(fixed)                             | — | -8.7  | 50.6  |
| <i>u</i> <sub>2031</sub> | H(82)...C(95)    | 836.7(50)  | 56.3(fixed)                             | — | -12.0 | 56.3  |
| <i>u</i> <sub>2187</sub> | C(71)...H(108)   | 836.8(52)  | 37.7(fixed)                             | — | -13.4 | 37.7  |
| <i>u</i> <sub>2206</sub> | C(67)...C(91)    | 837.3(66)  | 33.4(tied to <i>u</i> <sub>2165</sub> ) | — | -15.5 | 34.0  |
| <i>u</i> <sub>2038</sub> | H(74)...H(105)   | 837.6(52)  | 71.8(fixed)                             | — | -11.8 | 71.8  |
| <i>u</i> <sub>2286</sub> | H(26)...H(53)    | 840.6(53)  | 116.3(fixed)                            | — | -36.7 | 116.3 |
| <i>u</i> <sub>2263</sub> | H(69)...H(108)   | 840.9(110) | 62.0(fixed)                             | — | -9.4  | 62.0  |
| <i>u</i> <sub>2235</sub> | H(65)...H(92)    | 841.5(52)  | 66.7(fixed)                             | — | -19.3 | 66.7  |
| <i>u</i> <sub>2105</sub> | H(74)...H(102)   | 842.4(174) | 72.5(fixed)                             | — | -14.3 | 72.5  |
| <i>u</i> <sub>2122</sub> | H(78)...H(97)    | 843.1(109) | 56.4(fixed)                             | — | -18.7 | 56.4  |
| <i>u</i> <sub>2210</sub> | C(67)...H(93)    | 843.5(66)  | 50.8(fixed)                             | — | -12.8 | 50.8  |
| <i>u</i> <sub>2137</sub> | H(126)...H(165)  | 844.0(68)  | 64.4(fixed)                             | — | -15.6 | 64.4  |
| <i>u</i> <sub>2219</sub> | H(120)...C(147)  | 844.7(46)  | 38.6(fixed)                             | — | -10.5 | 38.6  |
| <i>u</i> <sub>2193</sub> | H(121)...C(151)  | 846.3(25)  | 30.7(fixed)                             | — | -9.0  | 30.7  |

|                          |                 |            |                                         |   |       |       |
|--------------------------|-----------------|------------|-----------------------------------------|---|-------|-------|
| <i>u</i> <sub>2207</sub> | H(126)...C(159) | 846.4(53)  | 40.2(fixed)                             | — | -13.2 | 40.2  |
| <i>u</i> <sub>2185</sub> | H(18)...H(45)   | 846.7(71)  | 109.0(fixed)                            | — | -27.4 | 109.0 |
| <i>u</i> <sub>2240</sub> | H(120)...H(148) | 846.8(60)  | 50.9(fixed)                             | — | -10.1 | 50.9  |
| <i>u</i> <sub>2211</sub> | C(119)...H(152) | 846.8(34)  | 31.2(fixed)                             | — | -10.9 | 31.2  |
| <i>u</i> <sub>1944</sub> | H(65)...H(106)  | 847.4(119) | 90.2(fixed)                             | — | -9.3  | 90.2  |
| <i>u</i> <sub>2246</sub> | C(79)...H(105)  | 847.9(60)  | 29.6(fixed)                             | — | -7.4  | 29.6  |
| <i>u</i> <sub>2256</sub> | H(25)...H(52)   | 848.0(39)  | 96.2(fixed)                             | — | -25.2 | 96.2  |
| <i>u</i> <sub>1948</sub> | H(74)...H(102)  | 848.7(174) | 63.4(fixed)                             | — | -9.4  | 63.4  |
| <i>u</i> <sub>1911</sub> | H(72)...H(102)  | 848.9(110) | 63.5(fixed)                             | — | -12.0 | 63.5  |
| <i>u</i> <sub>2231</sub> | H(17)...H(48)   | 851.1(39)  | 59.2(fixed)                             | — | -34.7 | 59.2  |
| <i>u</i> <sub>2229</sub> | H(134)...H(160) | 853.3(61)  | 57.4(fixed)                             | — | -16.0 | 57.4  |
| <i>u</i> <sub>2250</sub> | H(122)...H(150) | 853.4(52)  | 50.6(fixed)                             | — | -7.4  | 50.6  |
| <i>u</i> <sub>2223</sub> | H(74)...H(78)   | 853.8(21)  | 21.6(fixed)                             | — | -14.6 | 21.6  |
| <i>u</i> <sub>2226</sub> | H(9)...H(22)    | 854.2(15)  | 27.3(fixed)                             | — | -25.0 | 27.3  |
| <i>u</i> <sub>2236</sub> | H(22)...H(52)   | 854.3(88)  | 90.7(fixed)                             | — | -20.7 | 90.7  |
| <i>u</i> <sub>2175</sub> | H(121)...H(153) | 854.3(61)  | 52.3(fixed)                             | — | -8.3  | 52.3  |
| <i>u</i> <sub>2253</sub> | C(15)...H(48)   | 854.4(29)  | 44.4(fixed)                             | — | -34.1 | 44.4  |
| <i>u</i> <sub>2103</sub> | H(126)...H(149) | 854.5(81)  | 79.7(fixed)                             | — | -1.8  | 79.7  |
| <i>u</i> <sub>2230</sub> | C(23)...C(47)   | 856.1(28)  | 39.8(tied to <i>u</i> <sub>2165</sub> ) | — | -36.3 | 40.5  |
| <i>u</i> <sub>2238</sub> | H(17)...H(50)   | 857.8(56)  | 74.9(fixed)                             | — | -24.5 | 74.9  |
| <i>u</i> <sub>2242</sub> | H(120)...H(152) | 857.8(66)  | 43.5(fixed)                             | — | -10.5 | 43.5  |
| <i>u</i> <sub>2212</sub> | H(124)...H(164) | 858.3(139) | 92.1(fixed)                             | — | -14.8 | 92.1  |
| <i>u</i> <sub>2294</sub> | H(16)...H(49)   | 858.6(47)  | 72.9(fixed)                             | — | -32.6 | 72.9  |
| <i>u</i> <sub>2189</sub> | C(135)...C(159) | 858.6(46)  | 27.0(tied to <i>u</i> <sub>2165</sub> ) | — | -13.2 | 27.4  |
| <i>u</i> <sub>2278</sub> | C(67)...H(108)  | 858.6(87)  | 43.6(fixed)                             | — | -14.3 | 43.6  |
| <i>u</i> <sub>2222</sub> | H(70)...H(93)   | 858.8(67)  | 62.8(fixed)                             | — | -11.5 | 62.8  |
| <i>u</i> <sub>2277</sub> | H(124)...H(160) | 858.9(65)  | 54.6(fixed)                             | — | -13.1 | 54.6  |
| <i>u</i> <sub>2264</sub> | H(16)...C(47)   | 859.2(33)  | 48.5(fixed)                             | — | -29.1 | 48.5  |
| <i>u</i> <sub>2301</sub> | H(18)...H(49)   | 859.6(66)  | 93.9(fixed)                             | — | -29.2 | 93.9  |
| <i>u</i> <sub>2228</sub> | C(15)...H(41)   | 859.7(29)  | 32.7(fixed)                             | — | -10.9 | 32.7  |
| <i>u</i> <sub>2251</sub> | H(125)...C(159) | 859.9(35)  | 30.3(fixed)                             | — | -15.6 | 30.3  |
| <i>u</i> <sub>2259</sub> | H(74)...H(109)  | 860.1(31)  | 43.1(fixed)                             | — | -14.6 | 43.1  |
| <i>u</i> <sub>2275</sub> | H(64)...H(94)   | 860.3(70)  | 56.8(fixed)                             | — | -23.6 | 56.8  |
| <i>u</i> <sub>2290</sub> | H(68)...C(107)  | 860.4(84)  | 39.3(fixed)                             | — | -15.1 | 39.3  |
| <i>u</i> <sub>2279</sub> | H(24)...H(38)   | 862.0(60)  | 58.0(fixed)                             | — | -25.3 | 58.0  |
| <i>u</i> <sub>2191</sub> | H(18)...H(46)   | 863.1(84)  | 85.3(fixed)                             | — | -13.3 | 85.3  |
| <i>u</i> <sub>2220</sub> | H(130)...H(134) | 863.6(12)  | 25.6(fixed)                             | — | -19.2 | 25.6  |
| <i>u</i> <sub>2234</sub> | C(23)...H(48)   | 863.7(37)  | 72.5(fixed)                             | — | -38.2 | 72.5  |
| <i>u</i> <sub>2188</sub> | H(22)...H(49)   | 863.9(62)  | 83.4(fixed)                             | — | -22.1 | 83.4  |
| <i>u</i> <sub>2271</sub> | H(125)...H(160) | 864.9(46)  | 45.0(fixed)                             | — | -16.1 | 45.0  |
| <i>u</i> <sub>2183</sub> | H(124)...H(165) | 864.9(109) | 78.6(fixed)                             | — | -16.8 | 78.6  |
| <i>u</i> <sub>2266</sub> | H(72)...H(108)  | 867.7(36)  | 50.7(fixed)                             | — | -18.5 | 50.7  |
| <i>u</i> <sub>2244</sub> | H(120)...H(149) | 867.7(33)  | 45.6(fixed)                             | — | -11.5 | 45.6  |
| <i>u</i> <sub>2245</sub> | H(126)...H(146) | 867.7(33)  | 45.6(fixed)                             | — | -11.5 | 45.6  |
| <i>u</i> <sub>2273</sub> | H(124)...C(159) | 867.8(58)  | 32.9(fixed)                             | — | -14.9 | 32.9  |
| <i>u</i> <sub>2215</sub> | H(126)...H(164) | 868.2(93)  | 68.6(fixed)                             | — | -18.5 | 68.6  |

|                          |                 |            |                                         |   |       |      |
|--------------------------|-----------------|------------|-----------------------------------------|---|-------|------|
| <i>u</i> <sub>2163</sub> | C(123)...H(149) | 869.2(62)  | 60.6(fixed)                             | — | -7.4  | 60.6 |
| <i>u</i> <sub>2261</sub> | C(123)...H(161) | 869.4(35)  | 32.1(fixed)                             | — | -18.3 | 32.1 |
| <i>u</i> <sub>2241</sub> | H(14)...H(46)   | 869.9(45)  | 53.2(fixed)                             | — | -17.3 | 53.2 |
| <i>u</i> <sub>2247</sub> | H(12)...H(45)   | 870.0(46)  | 75.7(fixed)                             | — | -28.2 | 75.7 |
| <i>u</i> <sub>2232</sub> | C(15)...H(42)   | 870.5(30)  | 30.8(fixed)                             | — | -11.2 | 30.8 |
| <i>u</i> <sub>2174</sub> | H(72)...H(106)  | 872.7(50)  | 64.4(fixed)                             | — | -19.8 | 64.4 |
| <i>u</i> <sub>2303</sub> | H(81)...H(105)  | 873.3(67)  | 36.6(fixed)                             | — | -10.1 | 36.6 |
| <i>u</i> <sub>2274</sub> | C(15)...H(50)   | 873.3(47)  | 57.8(fixed)                             | — | -27.0 | 57.8 |
| <i>u</i> <sub>2289</sub> | H(18)...C(47)   | 873.6(49)  | 58.3(fixed)                             | — | -29.3 | 58.3 |
| <i>u</i> <sub>2267</sub> | H(134)...H(162) | 874.4(119) | 67.7(fixed)                             | — | -14.4 | 67.7 |
| <i>u</i> <sub>2197</sub> | C(123)...C(147) | 875.8(40)  | 39.7(tied to <i>u</i> <sub>2165</sub> ) | — | -10.9 | 40.3 |
| <i>u</i> <sub>2297</sub> | C(23)...H(49)   | 876.0(30)  | 41.7(fixed)                             | — | -43.2 | 41.7 |
| <i>u</i> <sub>2209</sub> | H(137)...C(159) | 876.8(46)  | 45.4(fixed)                             | — | -13.1 | 45.4 |
| <i>u</i> <sub>2252</sub> | H(24)...H(48)   | 877.3(51)  | 95.6(fixed)                             | — | -43.4 | 95.6 |
| <i>u</i> <sub>2321</sub> | H(65)...H(94)   | 877.8(123) | 62.3(fixed)                             | — | -25.6 | 62.3 |
| <i>u</i> <sub>2280</sub> | C(123)...H(162) | 878.4(60)  | 33.2(fixed)                             | — | -16.0 | 33.2 |
| <i>u</i> <sub>2204</sub> | C(79)...H(104)  | 879.4(38)  | 32.5(fixed)                             | — | -6.0  | 32.5 |
| <i>u</i> <sub>2320</sub> | H(65)...H(88)   | 882.6(104) | 39.8(fixed)                             | — | -25.4 | 39.8 |
| <i>u</i> <sub>2248</sub> | H(130)...H(152) | 884.6(113) | 44.3(fixed)                             | — | -13.7 | 44.3 |
| <i>u</i> <sub>2328</sub> | H(25)...H(49)   | 886.6(49)  | 47.9(fixed)                             | — | -46.5 | 47.9 |
| <i>u</i> <sub>2307</sub> | H(24)...H(49)   | 886.7(31)  | 68.4(fixed)                             | — | -47.7 | 68.4 |
| <i>u</i> <sub>2086</sub> | C(67)...H(104)  | 886.8(40)  | 53.6(fixed)                             | — | -3.9  | 53.6 |
| <i>u</i> <sub>2260</sub> | H(80)...H(105)  | 886.8(42)  | 40.9(fixed)                             | — | -5.5  | 40.9 |
| <i>u</i> <sub>2306</sub> | H(26)...H(37)   | 887.7(62)  | 51.8(fixed)                             | — | -21.6 | 51.8 |
| <i>u</i> <sub>2282</sub> | C(67)...H(92)   | 887.9(45)  | 31.3(fixed)                             | — | -18.5 | 31.3 |
| <i>u</i> <sub>2326</sub> | H(70)...H(108)  | 888.2(56)  | 46.1(fixed)                             | — | -17.9 | 46.1 |
| <i>u</i> <sub>2268</sub> | C(135)...H(160) | 888.4(36)  | 31.7(fixed)                             | — | -16.4 | 31.7 |
| <i>u</i> <sub>2269</sub> | H(17)...H(41)   | 889.1(28)  | 43.9(fixed)                             | — | -10.6 | 43.9 |
| <i>u</i> <sub>2168</sub> | H(70)...H(102)  | 892.1(87)  | 58.2(fixed)                             | — | -16.6 | 58.2 |
| <i>u</i> <sub>2227</sub> | C(67)...H(105)  | 892.5(20)  | 43.1(fixed)                             | — | -13.4 | 43.1 |
| <i>u</i> <sub>2296</sub> | H(121)...H(148) | 894.1(43)  | 53.4(fixed)                             | — | -11.2 | 53.4 |
| <i>u</i> <sub>2162</sub> | H(68)...H(102)  | 894.3(147) | 78.0(fixed)                             | — | -12.9 | 78.0 |
| <i>u</i> <sub>2288</sub> | C(79)...H(106)  | 894.8(62)  | 28.5(fixed)                             | — | -7.6  | 28.5 |
| <i>u</i> <sub>2300</sub> | H(16)...H(41)   | 895.5(34)  | 35.3(fixed)                             | — | -14.6 | 35.3 |
| <i>u</i> <sub>2285</sub> | H(126)...H(161) | 895.9(39)  | 44.9(fixed)                             | — | -18.3 | 44.9 |
| <i>u</i> <sub>2213</sub> | H(22)...H(50)   | 896.3(86)  | 79.3(fixed)                             | — | -10.3 | 79.3 |
| <i>u</i> <sub>2276</sub> | C(15)...H(40)   | 896.4(38)  | 30.3(fixed)                             | — | -11.3 | 30.3 |
| <i>u</i> <sub>2342</sub> | H(68)...H(109)  | 896.8(64)  | 38.2(fixed)                             | — | -18.5 | 38.2 |
| <i>u</i> <sub>2298</sub> | H(69)...H(93)   | 897.1(52)  | 47.6(fixed)                             | — | -17.5 | 47.6 |
| <i>u</i> <sub>2237</sub> | H(70)...H(102)  | 897.4(86)  | 36.0(fixed)                             | — | -13.6 | 36.0 |
| <i>u</i> <sub>2292</sub> | H(121)...C(147) | 897.8(29)  | 38.1(fixed)                             | — | -12.5 | 38.1 |
| <i>u</i> <sub>2310</sub> | H(68)...H(93)   | 898.8(85)  | 63.8(fixed)                             | — | -15.7 | 63.8 |
| <i>u</i> <sub>2258</sub> | H(68)...H(102)  | 899.0(146) | 51.4(fixed)                             | — | -12.0 | 51.4 |
| <i>u</i> <sub>2312</sub> | H(16)...H(48)   | 899.8(26)  | 49.6(fixed)                             | — | -34.1 | 49.6 |
| <i>u</i> <sub>2317</sub> | C(67)...H(94)   | 900.9(85)  | 42.9(fixed)                             | — | -20.5 | 42.9 |
| <i>u</i> <sub>2305</sub> | C(119)...H(150) | 901.9(34)  | 31.4(fixed)                             | — | -12.9 | 31.4 |

|                          |                 |            |             |   |       |      |
|--------------------------|-----------------|------------|-------------|---|-------|------|
| <i>u</i> <sub>2291</sub> | H(12)...H(46)   | 903.5(73)  | 68.3(fixed) | — | -21.3 | 68.3 |
| <i>u</i> <sub>2283</sub> | H(136)...H(161) | 903.5(37)  | 46.3(fixed) | — | -16.4 | 46.3 |
| <i>u</i> <sub>2254</sub> | H(137)...H(161) | 904.3(52)  | 56.0(fixed) | — | -16.6 | 56.0 |
| <i>u</i> <sub>2330</sub> | H(28)...H(52)   | 904.4(46)  | 67.5(fixed) | — | -35.2 | 67.5 |
| <i>u</i> <sub>2281</sub> | H(17)...H(42)   | 905.2(36)  | 37.8(fixed) | — | -12.7 | 37.8 |
| <i>u</i> <sub>2284</sub> | H(121)...H(149) | 905.5(49)  | 50.1(fixed) | — | -11.2 | 50.1 |
| <i>u</i> <sub>2325</sub> | H(12)...H(50)   | 905.6(80)  | 58.1(fixed) | — | -20.1 | 58.1 |
| <i>u</i> <sub>2265</sub> | C(123)...H(148) | 907.1(29)  | 46.7(fixed) | — | -14.3 | 46.7 |
| <i>u</i> <sub>2249</sub> | H(125)...H(149) | 909.3(46)  | 64.7(fixed) | — | -12.8 | 64.7 |
| <i>u</i> <sub>2309</sub> | H(125)...H(161) | 909.6(30)  | 39.8(fixed) | — | -19.7 | 39.8 |
| <i>u</i> <sub>2311</sub> | H(136)...H(160) | 910.6(40)  | 39.2(fixed) | — | -16.6 | 39.2 |
| <i>u</i> <sub>2134</sub> | H(69)...H(104)  | 912.1(44)  | 62.7(fixed) | — | -4.1  | 62.7 |
| <i>u</i> <sub>2332</sub> | H(81)...H(106)  | 912.8(75)  | 32.9(fixed) | — | -10.4 | 32.9 |
| <i>u</i> <sub>2293</sub> | H(70)...H(105)  | 914.5(29)  | 45.2(fixed) | — | -15.3 | 45.2 |
| <i>u</i> <sub>2272</sub> | H(69)...H(105)  | 914.6(34)  | 50.2(fixed) | — | -13.9 | 50.2 |
| <i>u</i> <sub>2181</sub> | H(74)...H(106)  | 914.9(66)  | 69.9(fixed) | — | -16.5 | 69.9 |
| <i>u</i> <sub>2318</sub> | H(126)...H(162) | 917.7(67)  | 41.3(fixed) | — | -17.9 | 41.3 |
| <i>u</i> <sub>2343</sub> | H(121)...H(144) | 919.7(110) | 44.9(fixed) | — | -14.2 | 44.9 |
| <i>u</i> <sub>2333</sub> | H(26)...H(52)   | 920.5(44)  | 95.1(fixed) | — | -30.5 | 95.1 |
| <i>u</i> <sub>2314</sub> | H(18)...H(41)   | 922.6(36)  | 40.1(fixed) | — | -12.8 | 40.1 |
| <i>u</i> <sub>2319</sub> | H(74)...H(108)  | 923.0(75)  | 46.0(fixed) | — | -19.2 | 46.0 |
| <i>u</i> <sub>2186</sub> | H(70)...H(104)  | 923.3(32)  | 50.4(fixed) | — | -9.3  | 50.4 |
| <i>u</i> <sub>2331</sub> | H(125)...H(162) | 923.7(44)  | 37.0(fixed) | — | -18.6 | 37.0 |
| <i>u</i> <sub>2338</sub> | H(124)...H(162) | 924.7(76)  | 41.6(fixed) | — | -16.9 | 41.6 |
| <i>u</i> <sub>2257</sub> | H(80)...H(104)  | 925.0(35)  | 38.3(fixed) | — | -7.5  | 38.3 |
| <i>u</i> <sub>2295</sub> | H(124)...H(152) | 925.2(75)  | 48.9(fixed) | — | -15.5 | 48.9 |
| <i>u</i> <sub>2340</sub> | H(18)...H(48)   | 925.8(37)  | 50.0(fixed) | — | -40.1 | 50.0 |
| <i>u</i> <sub>2322</sub> | H(69)...H(92)   | 929.4(33)  | 39.0(fixed) | — | -19.4 | 39.0 |
| <i>u</i> <sub>2336</sub> | H(124)...H(161) | 930.3(46)  | 35.6(fixed) | — | -22.1 | 35.6 |
| <i>u</i> <sub>2339</sub> | H(16)...H(50)   | 930.5(40)  | 56.6(fixed) | — | -32.0 | 56.6 |
| <i>u</i> <sub>2337</sub> | H(120)...H(150) | 930.5(56)  | 39.5(fixed) | — | -14.7 | 39.5 |
| <i>u</i> <sub>2304</sub> | C(135)...H(162) | 931.9(59)  | 34.3(fixed) | — | -16.1 | 34.3 |
| <i>u</i> <sub>2329</sub> | C(23)...H(50)   | 936.3(31)  | 47.0(fixed) | — | -39.3 | 47.0 |
| <i>u</i> <sub>2323</sub> | H(24)...H(50)   | 937.5(43)  | 83.8(fixed) | — | -38.5 | 83.8 |
| <i>u</i> <sub>2346</sub> | H(18)...H(50)   | 938.6(59)  | 66.4(fixed) | — | -30.6 | 66.4 |
| <i>u</i> <sub>2316</sub> | H(125)...H(148) | 940.9(30)  | 48.0(fixed) | — | -17.8 | 48.0 |
| <i>u</i> <sub>2327</sub> | H(17)...H(40)   | 941.2(36)  | 33.6(fixed) | — | -15.0 | 33.6 |
| <i>u</i> <sub>2335</sub> | H(121)...H(152) | 942.9(26)  | 32.2(fixed) | — | -16.5 | 32.2 |
| <i>u</i> <sub>2351</sub> | H(68)...H(108)  | 944.7(103) | 51.6(fixed) | — | -19.7 | 51.6 |
| <i>u</i> <sub>2308</sub> | H(137)...H(162) | 945.7(57)  | 53.8(fixed) | — | -14.3 | 53.8 |
| <i>u</i> <sub>2313</sub> | H(80)...H(106)  | 948.7(47)  | 36.4(fixed) | — | -9.2  | 36.4 |
| <i>u</i> <sub>2299</sub> | H(124)...H(149) | 948.8(70)  | 62.5(fixed) | — | -11.3 | 62.5 |
| <i>u</i> <sub>2345</sub> | H(82)...H(106)  | 950.5(77)  | 35.9(fixed) | — | -8.3  | 35.9 |
| <i>u</i> <sub>2176</sub> | H(68)...H(104)  | 951.5(51)  | 66.3(fixed) | — | -4.0  | 66.3 |
| <i>u</i> <sub>2334</sub> | H(18)...H(40)   | 953.8(51)  | 38.9(fixed) | — | -11.7 | 38.9 |
| <i>u</i> <sub>2350</sub> | H(68)...H(92)   | 956.4(58)  | 40.9(fixed) | — | -24.4 | 40.9 |

|                          |                 |            |             |   |       |      |
|--------------------------|-----------------|------------|-------------|---|-------|------|
| <i>u</i> <sub>2287</sub> | C(67)...H(106)  | 957.1(46)  | 47.0(fixed) | — | -14.5 | 47.0 |
| <i>u</i> <sub>2324</sub> | C(123)...H(150) | 958.9(43)  | 41.9(fixed) | — | -15.4 | 41.9 |
| <i>u</i> <sub>2353</sub> | H(25)...H(50)   | 959.1(27)  | 45.2(fixed) | — | -47.6 | 45.2 |
| <i>u</i> <sub>2354</sub> | H(68)...H(94)   | 961.8(112) | 54.9(fixed) | — | -26.4 | 54.9 |
| <i>u</i> <sub>2348</sub> | H(138)...H(160) | 967.6(43)  | 35.4(fixed) | — | -21.4 | 35.4 |
| <i>u</i> <sub>2347</sub> | H(136)...H(162) | 967.7(43)  | 35.2(fixed) | — | -21.4 | 35.2 |
| <i>u</i> <sub>2302</sub> | H(69)...H(106)  | 968.4(60)  | 59.9(fixed) | — | -11.7 | 59.9 |
| <i>u</i> <sub>2315</sub> | H(68)...H(105)  | 968.4(23)  | 53.8(fixed) | — | -16.6 | 53.8 |
| <i>u</i> <sub>2349</sub> | H(124)...H(148) | 985.2(27)  | 49.9(fixed) | — | -17.9 | 49.9 |
| <i>u</i> <sub>2355</sub> | H(121)...H(150) | 991.4(30)  | 36.9(fixed) | — | -18.5 | 36.9 |
| <i>u</i> <sub>2341</sub> | H(70)...H(106)  | 992.2(26)  | 41.0(fixed) | — | -19.6 | 41.0 |
| <i>u</i> <sub>2352</sub> | H(138)...H(162) | 1002.5(78) | 41.6(fixed) | — | -18.6 | 41.6 |
| <i>u</i> <sub>2356</sub> | H(26)...H(50)   | 1016.5(39) | 51.7(fixed) | — | -43.3 | 51.7 |
| <i>u</i> <sub>2344</sub> | H(68)...H(106)  | 1029.5(59) | 60.9(fixed) | — | -17.3 | 60.9 |
| <i>u</i> <sub>2357</sub> | H(124)...H(150) | 1044.8(46) | 43.3(fixed) | — | -20.9 | 43.3 |

---

**Table S11** Interatomic distances ( $r_a$  / pm), refined and calculated amplitudes of vibration ( $u_{h1}$  / pm) and perpendicular corrections ( $k_{h1}$  / pm) for the SARACEN-restrained GED structure of **2**.

|          | Atom pair     | $r_a$    | $u_{h1}$ (GED)  | Restraint | $k_{h1}$ | $u_{h1}$ (calc.) |
|----------|---------------|----------|-----------------|-----------|----------|------------------|
| $u_{12}$ | C(179)-H(182) | 109.6(2) | 8.9(tied to u9) | —         | 0.4      | 7.7              |
| $u_{14}$ | C(135)-H(137) | 109.7(2) | 8.9(tied to u9) | —         | 0.4      | 7.7              |
| $u_9$    | C(27)-H(30)   | 109.7(2) | 8.9(2)          | 7.6(8)    | 0.4      | 7.7              |
| $u_{19}$ | C(147)-H(149) | 109.7(2) | 8.9(tied to u9) | —         | 0.4      | 7.7              |
| $u_6$    | C(85)-H(87)   | 109.7(2) | 8.9(tied to u9) | —         | 0.4      | 7.7              |
| $u_{60}$ | C(11)-H(12)   | 109.7(2) | 9.0(tied to u9) | —         | 0.4      | 7.7              |
| $u_{50}$ | C(131)-H(133) | 109.7(2) | 9.0(tied to u9) | —         | 0.4      | 7.7              |
| $u_{51}$ | C(143)-H(146) | 109.7(2) | 9.0(tied to u9) | —         | 0.4      | 7.7              |
| $u_{52}$ | C(151)-H(152) | 109.7(2) | 9.0(tied to u9) | —         | 0.4      | 7.7              |
| $u_{63}$ | C(139)-H(142) | 109.7(2) | 9.0(tied to u9) | —         | 0.4      | 7.7              |
| $u_{48}$ | C(69)-H(71)   | 109.7(2) | 9.0(tied to u9) | —         | 0.4      | 7.7              |
| $u_{46}$ | C(7)-H(9)     | 109.7(2) | 9.0(tied to u9) | —         | 0.4      | 7.7              |
| $u_{57}$ | C(85)-H(88)   | 109.7(2) | 9.0(tied to u9) | —         | 0.4      | 7.7              |
| $u_{58}$ | C(135)-H(136) | 109.7(2) | 9.0(tied to u9) | —         | 0.4      | 7.7              |
| $u_{59}$ | C(147)-H(150) | 109.7(2) | 9.0(tied to u9) | —         | 0.4      | 7.7              |
| $u_{47}$ | C(31)-H(32)   | 109.7(2) | 9.0(tied to u9) | —         | 0.4      | 7.7              |
| $u_{62}$ | C(73)-H(74)   | 109.7(2) | 9.0(tied to u9) | —         | 0.4      | 7.7              |
| $u_{54}$ | C(19)-H(22)   | 109.7(2) | 9.0(tied to u9) | —         | 0.4      | 7.7              |
| $u_{61}$ | C(23)-H(26)   | 109.7(2) | 9.0(tied to u9) | —         | 0.4      | 7.7              |
| $u_{53}$ | C(15)-H(18)   | 109.7(2) | 9.0(tied to u9) | —         | 0.4      | 7.7              |
| $u_{55}$ | C(77)-H(80)   | 109.7(2) | 9.0(tied to u9) | —         | 0.4      | 7.7              |
| $u_{56}$ | C(81)-H(84)   | 109.7(2) | 9.0(tied to u9) | —         | 0.4      | 7.7              |
| $u_{49}$ | C(93)-H(94)   | 109.7(2) | 8.9(tied to u9) | —         | 0.4      | 7.7              |
| $u_{43}$ | C(143)-H(145) | 109.7(2) | 8.9(tied to u9) | —         | 0.4      | 7.7              |
| $u_{44}$ | C(15)-H(16)   | 109.7(2) | 8.9(tied to u9) | —         | 0.4      | 7.7              |
| $u_{29}$ | C(179)-H(183) | 109.7(2) | 8.9(tied to u9) | —         | 0.4      | 7.7              |
| $u_{35}$ | C(7)-H(8)     | 109.7(2) | 8.9(tied to u9) | —         | 0.4      | 7.7              |
| $u_{36}$ | C(55)-H(59)   | 109.7(2) | 8.9(tied to u9) | —         | 0.4      | 7.7              |
| $u_{27}$ | C(55)-H(58)   | 109.7(2) | 8.9(tied to u9) | —         | 0.4      | 7.7              |
| $u_{45}$ | C(117)-H(121) | 109.7(2) | 8.9(tied to u9) | —         | 0.4      | 7.7              |
| $u_{31}$ | C(179)-H(181) | 109.7(2) | 8.9(tied to u9) | —         | 0.4      | 7.7              |
| $u_{41}$ | C(77)-H(78)   | 109.7(2) | 8.9(tied to u9) | —         | 0.4      | 7.7              |
| $u_{40}$ | C(11)-H(14)   | 109.7(2) | 8.9(tied to u9) | —         | 0.4      | 7.7              |
| $u_{42}$ | C(135)-H(138) | 109.7(2) | 8.9(tied to u9) | —         | 0.4      | 7.7              |
| $u_{32}$ | C(19)-H(21)   | 109.7(2) | 8.9(tied to u9) | —         | 0.4      | 7.7              |
| $u_{28}$ | C(81)-H(83)   | 109.7(2) | 8.9(tied to u9) | —         | 0.4      | 7.7              |
| $u_{33}$ | C(23)-H(24)   | 109.7(2) | 8.9(tied to u9) | —         | 0.4      | 7.7              |
| $u_{38}$ | C(131)-H(134) | 109.7(2) | 8.9(tied to u9) | —         | 0.4      | 7.7              |
| $u_{34}$ | C(73)-H(76)   | 109.7(2) | 8.9(tied to u9) | —         | 0.4      | 7.7              |
| $u_{30}$ | C(89)-H(91)   | 109.7(2) | 8.9(tied to u9) | —         | 0.4      | 7.7              |
| $u_{18}$ | C(117)-H(120) | 109.7(2) | 8.9(tied to u9) | —         | 0.4      | 7.7              |
| $u_{23}$ | C(23)-H(25)   | 109.7(2) | 8.9(tied to u9) | —         | 0.4      | 7.7              |



|                         |                 |          |                                     |   |      |      |
|-------------------------|-----------------|----------|-------------------------------------|---|------|------|
| <i>u</i> <sub>25</sub>  | C(73)-H(75)     | 109.7(2) | 8.9(tied to <i>u</i> <sub>9</sub> ) | — | 0.4  | 7.7  |
| <i>u</i> <sub>37</sub>  | C(85)-H(86)     | 109.7(2) | 8.9(tied to <i>u</i> <sub>9</sub> ) | — | 0.4  | 7.7  |
| <i>u</i> <sub>22</sub>  | C(117)-H(119)   | 109.7(2) | 8.9(tied to <i>u</i> <sub>9</sub> ) | — | 0.4  | 7.7  |
| <i>u</i> <sub>7</sub>   | C(19)-H(20)     | 109.7(2) | 8.9(tied to <i>u</i> <sub>9</sub> ) | — | 0.4  | 7.7  |
| <i>u</i> <sub>24</sub>  | C(69)-H(70)     | 109.7(2) | 8.9(tied to <i>u</i> <sub>9</sub> ) | — | 0.4  | 7.7  |
| <i>u</i> <sub>39</sub>  | C(147)-H(148)   | 109.7(2) | 8.9(tied to <i>u</i> <sub>9</sub> ) | — | 0.4  | 7.7  |
| <i>u</i> <sub>21</sub>  | C(7)-H(10)      | 109.7(2) | 8.9(tied to <i>u</i> <sub>9</sub> ) | — | 0.4  | 7.7  |
| <i>u</i> <sub>17</sub>  | C(139)-H(141)   | 109.7(2) | 8.9(tied to <i>u</i> <sub>9</sub> ) | — | 0.4  | 7.7  |
| <i>u</i> <sub>13</sub>  | C(69)-H(72)     | 109.7(2) | 8.9(tied to <i>u</i> <sub>9</sub> ) | — | 0.4  | 7.7  |
| <i>u</i> <sub>5</sub>   | C(11)-H(13)     | 109.7(2) | 8.9(tied to <i>u</i> <sub>9</sub> ) | — | 0.4  | 7.7  |
| <i>u</i> <sub>20</sub>  | C(151)-H(153)   | 109.7(2) | 8.9(tied to <i>u</i> <sub>9</sub> ) | — | 0.4  | 7.7  |
| <i>u</i> <sub>16</sub>  | C(131)-H(132)   | 109.7(2) | 8.9(tied to <i>u</i> <sub>9</sub> ) | — | 0.4  | 7.7  |
| <i>u</i> <sub>10</sub>  | C(77)-H(79)     | 109.7(2) | 8.9(tied to <i>u</i> <sub>9</sub> ) | — | 0.4  | 7.7  |
| <i>u</i> <sub>15</sub>  | C(89)-H(92)     | 109.7(2) | 8.9(tied to <i>u</i> <sub>9</sub> ) | — | 0.4  | 7.7  |
| <i>u</i> <sub>26</sub>  | C(27)-H(29)     | 109.7(2) | 8.9(tied to <i>u</i> <sub>9</sub> ) | — | 0.4  | 7.7  |
| <i>u</i> <sub>11</sub>  | C(151)-H(154)   | 109.7(2) | 8.9(tied to <i>u</i> <sub>9</sub> ) | — | 0.4  | 7.7  |
| <i>u</i> <sub>2</sub>   | C(139)-H(140)   | 109.7(2) | 8.9(tied to <i>u</i> <sub>9</sub> ) | — | 0.4  | 7.7  |
| <i>u</i> <sub>8</sub>   | C(55)-H(57)     | 109.7(2) | 8.9(tied to <i>u</i> <sub>9</sub> ) | — | 0.4  | 7.7  |
| <i>u</i> <sub>3</sub>   | C(143)-H(144)   | 109.7(2) | 8.9(tied to <i>u</i> <sub>9</sub> ) | — | 0.4  | 7.7  |
| <i>u</i> <sub>4</sub>   | C(15)-H(17)     | 109.7(2) | 8.9(tied to <i>u</i> <sub>9</sub> ) | — | 0.4  | 7.7  |
| <i>u</i> <sub>1</sub>   | C(81)-H(82)     | 109.7(2) | 8.9(tied to <i>u</i> <sub>9</sub> ) | — | 0.4  | 7.7  |
| <i>u</i> <sub>68</sub>  | H(29)...H(30)   | 175.5(8) | 12.6(fixed)                         | — | -0.3 | 12.6 |
| <i>u</i> <sub>126</sub> | H(24)...H(25)   | 175.5(8) | 12.6(fixed)                         | — | -0.3 | 12.6 |
| <i>u</i> <sub>67</sub>  | H(182)...H(183) | 175.5(8) | 12.7(fixed)                         | — | -0.2 | 12.7 |
| <i>u</i> <sub>108</sub> | H(181)...H(183) | 175.5(8) | 12.6(fixed)                         | — | -0.2 | 12.6 |
| <i>u</i> <sub>78</sub>  | H(8)...H(9)     | 175.5(8) | 12.6(fixed)                         | — | -0.2 | 12.6 |
| <i>u</i> <sub>86</sub>  | H(148)...H(150) | 175.5(8) | 12.6(fixed)                         | — | -0.2 | 12.6 |
| <i>u</i> <sub>91</sub>  | H(149)...H(150) | 175.5(8) | 12.6(fixed)                         | — | -0.2 | 12.6 |
| <i>u</i> <sub>113</sub> | H(12)...H(13)   | 175.5(8) | 12.6(fixed)                         | — | -0.2 | 12.6 |
| <i>u</i> <sub>76</sub>  | H(132)...H(133) | 175.5(8) | 12.6(fixed)                         | — | -0.2 | 12.6 |
| <i>u</i> <sub>74</sub>  | H(181)...H(182) | 175.5(8) | 12.6(fixed)                         | — | -0.2 | 12.6 |
| <i>u</i> <sub>84</sub>  | H(12)...H(14)   | 175.5(8) | 12.7(fixed)                         | — | -0.2 | 12.7 |
| <i>u</i> <sub>80</sub>  | H(83)...H(84)   | 175.5(8) | 12.6(fixed)                         | — | -0.2 | 12.6 |
| <i>u</i> <sub>119</sub> | H(75)...H(76)   | 175.5(8) | 12.6(fixed)                         | — | -0.2 | 12.6 |
| <i>u</i> <sub>66</sub>  | H(70)...H(72)   | 175.5(8) | 12.6(fixed)                         | — | -0.2 | 12.6 |
| <i>u</i> <sub>114</sub> | H(13)...H(14)   | 175.5(8) | 12.6(fixed)                         | — | -0.2 | 12.6 |
| <i>u</i> <sub>110</sub> | H(20)...H(21)   | 175.5(8) | 12.6(fixed)                         | — | -0.2 | 12.6 |
| <i>u</i> <sub>79</sub>  | H(8)...H(10)    | 175.5(8) | 12.6(fixed)                         | — | -0.2 | 12.6 |
| <i>u</i> <sub>94</sub>  | H(91)...H(92)   | 175.5(8) | 12.6(fixed)                         | — | -0.2 | 12.6 |
| <i>u</i> <sub>121</sub> | H(132)...H(134) | 175.5(8) | 12.6(fixed)                         | — | -0.2 | 12.6 |
| <i>u</i> <sub>89</sub>  | H(86)...H(88)   | 175.5(8) | 12.6(fixed)                         | — | -0.2 | 12.6 |
| <i>u</i> <sub>95</sub>  | H(152)...H(154) | 175.5(8) | 12.6(fixed)                         | — | -0.2 | 12.6 |
| <i>u</i> <sub>104</sub> | H(17)...H(18)   | 175.5(8) | 12.6(fixed)                         | — | -0.2 | 12.6 |
| <i>u</i> <sub>118</sub> | H(148)...H(149) | 175.5(8) | 12.6(fixed)                         | — | -0.2 | 12.6 |
| <i>u</i> <sub>83</sub>  | H(16)...H(18)   | 175.5(8) | 12.6(fixed)                         | — | -0.2 | 12.6 |
| <i>u</i> <sub>90</sub>  | H(90)...H(91)   | 175.5(8) | 12.6(fixed)                         | — | -0.2 | 12.6 |

|                         |                 |          |                                       |   |      |      |
|-------------------------|-----------------|----------|---------------------------------------|---|------|------|
| <i>u</i> <sub>73</sub>  | H(9)...H(10)    | 175.5(8) | 12.6(fixed)                           | — | -0.2 | 12.6 |
| <i>u</i> <sub>65</sub>  | H(82)...H(83)   | 175.5(8) | 12.6(fixed)                           | — | -0.2 | 12.6 |
| <i>u</i> <sub>101</sub> | H(86)...H(87)   | 175.5(8) | 12.6(fixed)                           | — | -0.2 | 12.6 |
| <i>u</i> <sub>103</sub> | H(137)...H(138) | 175.5(8) | 12.6(fixed)                           | — | -0.2 | 12.6 |
| <i>u</i> <sub>107</sub> | H(152)...H(153) | 175.5(8) | 12.6(fixed)                           | — | -0.2 | 12.6 |
| <i>u</i> <sub>109</sub> | H(16)...H(17)   | 175.5(8) | 12.6(fixed)                           | — | -0.2 | 12.6 |
| <i>u</i> <sub>116</sub> | H(87)...H(88)   | 175.5(8) | 12.6(fixed)                           | — | -0.2 | 12.6 |
| <i>u</i> <sub>117</sub> | H(78)...H(79)   | 175.5(8) | 12.6(fixed)                           | — | -0.2 | 12.6 |
| <i>u</i> <sub>125</sub> | H(136)...H(137) | 175.5(8) | 12.6(fixed)                           | — | -0.2 | 12.6 |
| <i>u</i> <sub>124</sub> | H(82)...H(84)   | 175.5(8) | 12.6(fixed)                           | — | -0.2 | 12.6 |
| <i>u</i> <sub>88</sub>  | H(140)...H(142) | 175.5(8) | 12.6(fixed)                           | — | -0.2 | 12.6 |
| <i>u</i> <sub>72</sub>  | H(144)...H(146) | 175.5(8) | 12.6(fixed)                           | — | -0.2 | 12.6 |
| <i>u</i> <sub>75</sub>  | H(58)...H(59)   | 175.5(8) | 12.6(fixed)                           | — | -0.2 | 12.6 |
| <i>u</i> <sub>70</sub>  | H(153)...H(154) | 175.5(8) | 12.6(fixed)                           | — | -0.2 | 12.6 |
| <i>u</i> <sub>115</sub> | H(57)...H(59)   | 175.6(8) | 12.6(fixed)                           | — | -0.2 | 12.6 |
| <i>u</i> <sub>82</sub>  | H(57)...H(58)   | 175.6(8) | 12.6(fixed)                           | — | -0.2 | 12.6 |
| <i>u</i> <sub>96</sub>  | H(133)...H(134) | 175.6(8) | 12.6(fixed)                           | — | -0.2 | 12.6 |
| <i>u</i> <sub>98</sub>  | H(145)...H(146) | 175.6(8) | 12.6(fixed)                           | — | -0.2 | 12.6 |
| <i>u</i> <sub>100</sub> | H(28)...H(29)   | 175.6(8) | 12.6(fixed)                           | — | -0.2 | 12.6 |
| <i>u</i> <sub>122</sub> | H(28)...H(30)   | 175.6(8) | 12.6(fixed)                           | — | -0.2 | 12.6 |
| <i>u</i> <sub>106</sub> | H(136)...H(138) | 175.6(8) | 12.6(fixed)                           | — | -0.2 | 12.6 |
| <i>u</i> <sub>123</sub> | H(140)...H(141) | 175.6(8) | 12.6(fixed)                           | — | -0.2 | 12.6 |
| <i>u</i> <sub>99</sub>  | H(141)...H(142) | 175.6(8) | 12.6(fixed)                           | — | -0.2 | 12.6 |
| <i>u</i> <sub>112</sub> | H(144)...H(145) | 175.6(8) | 12.6(fixed)                           | — | -0.2 | 12.6 |
| <i>u</i> <sub>81</sub>  | H(120)...H(121) | 175.6(8) | 12.6(fixed)                           | — | -0.2 | 12.6 |
| <i>u</i> <sub>64</sub>  | H(119)...H(121) | 175.6(8) | 12.6(fixed)                           | — | -0.2 | 12.6 |
| <i>u</i> <sub>105</sub> | H(119)...H(120) | 175.6(8) | 12.6(fixed)                           | — | -0.2 | 12.6 |
| <i>u</i> <sub>77</sub>  | H(25)...H(26)   | 175.6(8) | 12.6(fixed)                           | — | -0.2 | 12.6 |
| <i>u</i> <sub>97</sub>  | H(74)...H(76)   | 175.6(8) | 12.6(fixed)                           | — | -0.2 | 12.6 |
| <i>u</i> <sub>102</sub> | H(71)...H(72)   | 175.6(8) | 12.6(fixed)                           | — | -0.2 | 12.6 |
| <i>u</i> <sub>71</sub>  | H(90)...H(92)   | 175.6(8) | 12.6(fixed)                           | — | -0.2 | 12.6 |
| <i>u</i> <sub>111</sub> | H(70)...H(71)   | 175.6(8) | 12.6(fixed)                           | — | -0.2 | 12.6 |
| <i>u</i> <sub>120</sub> | H(79)...H(80)   | 175.6(8) | 12.6(fixed)                           | — | -0.2 | 12.6 |
| <i>u</i> <sub>85</sub>  | H(74)...H(75)   | 175.6(8) | 12.6(fixed)                           | — | -0.2 | 12.6 |
| <i>u</i> <sub>87</sub>  | H(24)...H(26)   | 175.6(8) | 12.6(fixed)                           | — | -0.2 | 12.6 |
| <i>u</i> <sub>93</sub>  | H(78)...H(80)   | 175.6(8) | 12.6(fixed)                           | — | -0.2 | 12.6 |
| <i>u</i> <sub>92</sub>  | H(21)...H(22)   | 175.6(8) | 12.6(fixed)                           | — | -0.2 | 12.6 |
| <i>u</i> <sub>69</sub>  | H(20)...H(22)   | 175.6(8) | 12.6(fixed)                           | — | -0.2 | 12.6 |
| <i>u</i> <sub>127</sub> | Si(4)-C(27)     | 187.7(2) | 6.3(2)                                | — | 0.2  | 5.9  |
| <i>u</i> <sub>129</sub> | Si(127)-C(139)  | 187.8(2) | 6.3(tied to <i>u</i> <sub>127</sub> ) | — | 0.2  | 5.9  |
| <i>u</i> <sub>128</sub> | Si(65)-C(69)    | 187.8(2) | 6.3(tied to <i>u</i> <sub>127</sub> ) | — | 0.2  | 5.9  |
| <i>u</i> <sub>131</sub> | Si(66)-C(81)    | 187.9(2) | 6.3(tied to <i>u</i> <sub>127</sub> ) | — | 0.2  | 5.9  |
| <i>u</i> <sub>132</sub> | Si(66)-C(89)    | 188.0(2) | 6.3(tied to <i>u</i> <sub>127</sub> ) | — | 0.2  | 5.9  |
| <i>u</i> <sub>130</sub> | Si(128)-C(151)  | 188.0(2) | 6.3(tied to <i>u</i> <sub>127</sub> ) | — | 0.2  | 5.9  |
| <i>u</i> <sub>138</sub> | Si(4)-C(19)     | 188.1(2) | 6.4(tied to <i>u</i> <sub>127</sub> ) | — | 0.2  | 6.0  |
| <i>u</i> <sub>140</sub> | Si(3)-C(11)     | 188.1(2) | 6.4(tied to <i>u</i> <sub>127</sub> ) | — | 0.2  | 6.0  |

|                         |                  |            |                                       |   |      |      |
|-------------------------|------------------|------------|---------------------------------------|---|------|------|
| <i>u</i> <sub>136</sub> | Si(127)-C(131)   | 188.1(2)   | 6.4(tied to <i>u</i> <sub>127</sub> ) | — | 0.2  | 5.9  |
| <i>u</i> <sub>133</sub> | Si(3)-C(7)       | 188.1(2)   | 6.4(tied to <i>u</i> <sub>127</sub> ) | — | 0.2  | 5.9  |
| <i>u</i> <sub>139</sub> | Si(65)-C(77)     | 188.1(2)   | 6.4(tied to <i>u</i> <sub>127</sub> ) | — | 0.2  | 5.9  |
| <i>u</i> <sub>134</sub> | Si(3)-C(15)      | 188.1(2)   | 6.4(tied to <i>u</i> <sub>127</sub> ) | — | 0.2  | 5.9  |
| <i>u</i> <sub>135</sub> | Si(128)-C(143)   | 188.1(2)   | 6.3(tied to <i>u</i> <sub>127</sub> ) | — | 0.2  | 5.9  |
| <i>u</i> <sub>141</sub> | Si(127)-C(135)   | 188.2(2)   | 6.4(tied to <i>u</i> <sub>127</sub> ) | — | 0.2  | 6.0  |
| <i>u</i> <sub>143</sub> | Si(65)-C(73)     | 188.2(2)   | 6.4(tied to <i>u</i> <sub>127</sub> ) | — | 0.2  | 6.0  |
| <i>u</i> <sub>137</sub> | Si(66)-C(85)     | 188.2(2)   | 6.4(tied to <i>u</i> <sub>127</sub> ) | — | 0.2  | 6.0  |
| <i>u</i> <sub>142</sub> | Si(4)-C(23)      | 188.3(2)   | 6.4(tied to <i>u</i> <sub>127</sub> ) | — | 0.2  | 6.0  |
| <i>u</i> <sub>144</sub> | Si(128)-C(147)   | 188.3(2)   | 6.4(tied to <i>u</i> <sub>127</sub> ) | — | 0.2  | 6.0  |
| <i>u</i> <sub>145</sub> | Si(125)-C(179)   | 192.9(19)  | 6.6(tied to <i>u</i> <sub>127</sub> ) | — | 0.2  | 6.2  |
| <i>u</i> <sub>146</sub> | Si(1)-C(55)      | 193.3(19)  | 6.6(tied to <i>u</i> <sub>127</sub> ) | — | 0.2  | 6.2  |
| <i>u</i> <sub>147</sub> | Si(63)-C(117)    | 193.4(19)  | 6.6(tied to <i>u</i> <sub>127</sub> ) | — | 0.2  | 6.2  |
| <i>u</i> <sub>157</sub> | H(144)...H(168)  | 197.9(297) | 56.9(fixed)                           | — | 22.7 | 56.9 |
| <i>u</i> <sub>179</sub> | H(20)...H(33)    | 229.8(162) | 63.4(fixed)                           | — | 31.7 | 63.4 |
| <i>u</i> <sub>177</sub> | H(10)...H(44)    | 229.8(162) | 63.4(fixed)                           | — | 31.7 | 63.4 |
| <i>u</i> <sub>242</sub> | H(58)...H(61)    | 232.5(113) | 51.4(fixed)                           | — | 12.3 | 51.4 |
| <i>u</i> <sub>232</sub> | H(17)...H(57)    | 233.8(90)  | 57.7(fixed)                           | — | 20.8 | 57.7 |
| <i>u</i> <sub>185</sub> | H(137)...H(149)  | 234.0(99)  | 59.8(fixed)                           | — | 22.7 | 59.8 |
| <i>u</i> <sub>164</sub> | H(132)...H(153)  | 235.8(144) | 53.0(fixed)                           | — | 26.4 | 53.0 |
| <i>u</i> <sub>152</sub> | Si(1)-Si(5)      | 236.3(1)   | 7.7(1)                                | — | 0.4  | 7.4  |
| <i>u</i> <sub>151</sub> | Si(63)-Si(68)    | 236.3(1)   | 7.7(tied to <i>u</i> <sub>152</sub> ) | — | 0.4  | 7.4  |
| <i>u</i> <sub>153</sub> | Si(1)-Si(6)      | 236.6(1)   | 7.7(tied to <i>u</i> <sub>152</sub> ) | — | 0.4  | 7.4  |
| <i>u</i> <sub>154</sub> | Si(63)-Si(67)    | 236.6(1)   | 7.7(tied to <i>u</i> <sub>152</sub> ) | — | 0.4  | 7.4  |
| <i>u</i> <sub>159</sub> | Si(125)-Si(126)  | 236.9(1)   | 8.0(tied to <i>u</i> <sub>152</sub> ) | — | 0.4  | 7.7  |
| <i>u</i> <sub>155</sub> | Si(125)-Si(130)  | 236.9(1)   | 7.8(tied to <i>u</i> <sub>152</sub> ) | — | 0.4  | 7.5  |
| <i>u</i> <sub>158</sub> | Si(1)-Si(2)      | 237.0(1)   | 7.9(tied to <i>u</i> <sub>152</sub> ) | — | 0.4  | 7.6  |
| <i>u</i> <sub>160</sub> | Si(63)-Si(64)    | 237.2(1)   | 8.0(tied to <i>u</i> <sub>152</sub> ) | — | 0.4  | 7.7  |
| <i>u</i> <sub>156</sub> | Si(125)-Si(129)  | 237.3(1)   | 7.9(tied to <i>u</i> <sub>152</sub> ) | — | 0.4  | 7.5  |
| <i>u</i> <sub>227</sub> | H(13)...H(25)    | 239.7(98)  | 69.2(fixed)                           | — | 37.3 | 69.2 |
| <i>u</i> <sub>239</sub> | H(140)...H(166)  | 245.3(176) | 71.2(fixed)                           | — | 28.1 | 71.2 |
| <i>u</i> <sub>268</sub> | H(8)...H(29)     | 248.3(149) | 98.6(fixed)                           | — | 26.7 | 98.6 |
| <i>u</i> <sub>168</sub> | Si(4)...H(28)    | 249.4(6)   | 13.2(fixed)                           | — | -0.4 | 13.2 |
| <i>u</i> <sub>192</sub> | Si(4)...H(29)    | 249.5(6)   | 13.3(fixed)                           | — | -0.4 | 13.3 |
| <i>u</i> <sub>196</sub> | Si(4)...H(30)    | 249.5(6)   | 13.2(fixed)                           | — | -0.4 | 13.2 |
| <i>u</i> <sub>199</sub> | Si(65)...H(70)   | 249.5(6)   | 13.2(fixed)                           | — | -0.4 | 13.2 |
| <i>u</i> <sub>206</sub> | Si(127)...H(141) | 249.5(6)   | 13.2(fixed)                           | — | -0.4 | 13.2 |
| <i>u</i> <sub>198</sub> | Si(65)...H(72)   | 249.6(6)   | 13.1(fixed)                           | — | -0.4 | 13.1 |
| <i>u</i> <sub>200</sub> | Si(127)...H(140) | 249.6(6)   | 13.1(fixed)                           | — | -0.4 | 13.1 |
| <i>u</i> <sub>165</sub> | Si(127)...H(142) | 249.6(6)   | 13.2(fixed)                           | — | -0.4 | 13.2 |
| <i>u</i> <sub>166</sub> | Si(65)...H(71)   | 249.6(6)   | 13.2(fixed)                           | — | -0.3 | 13.2 |
| <i>u</i> <sub>186</sub> | Si(66)...H(83)   | 249.6(6)   | 13.3(fixed)                           | — | -0.4 | 13.3 |
| <i>u</i> <sub>171</sub> | Si(66)...H(84)   | 249.6(6)   | 13.2(fixed)                           | — | -0.4 | 13.2 |
| <i>u</i> <sub>213</sub> | Si(66)...H(82)   | 249.7(6)   | 13.1(fixed)                           | — | -0.4 | 13.1 |
| <i>u</i> <sub>204</sub> | Si(66)...H(92)   | 249.7(6)   | 13.5(fixed)                           | — | -0.4 | 13.5 |
| <i>u</i> <sub>201</sub> | Si(66)...H(91)   | 249.7(6)   | 13.3(fixed)                           | — | -0.4 | 13.3 |

|                         |                  |            |             |   |      |      |
|-------------------------|------------------|------------|-------------|---|------|------|
| <i>u</i> <sub>175</sub> | Si(66)...H(90)   | 249.7(6)   | 13.3(fixed) | — | -0.4 | 13.3 |
| <i>u</i> <sub>189</sub> | Si(128)...H(153) | 249.7(6)   | 13.2(fixed) | — | -0.4 | 13.2 |
| <i>u</i> <sub>182</sub> | Si(128)...H(152) | 249.7(6)   | 13.2(fixed) | — | -0.4 | 13.2 |
| <i>u</i> <sub>202</sub> | Si(128)...H(154) | 249.8(6)   | 13.1(fixed) | — | -0.3 | 13.1 |
| <i>u</i> <sub>224</sub> | Si(4)...H(20)    | 249.8(6)   | 13.3(fixed) | — | -0.4 | 13.3 |
| <i>u</i> <sub>194</sub> | Si(4)...H(21)    | 249.8(6)   | 13.3(fixed) | — | -0.4 | 13.3 |
| <i>u</i> <sub>216</sub> | Si(3)...H(10)    | 249.8(6)   | 13.3(fixed) | — | -0.4 | 13.3 |
| <i>u</i> <sub>170</sub> | Si(127)...H(133) | 249.8(6)   | 13.3(fixed) | — | -0.4 | 13.3 |
| <i>u</i> <sub>176</sub> | Si(3)...H(12)    | 249.8(6)   | 13.4(fixed) | — | -0.4 | 13.4 |
| <i>u</i> <sub>195</sub> | Si(65)...H(78)   | 249.8(6)   | 13.2(fixed) | — | -0.4 | 13.2 |
| <i>u</i> <sub>190</sub> | Si(3)...H(8)     | 249.8(6)   | 13.3(fixed) | — | -0.4 | 13.3 |
| <i>u</i> <sub>173</sub> | Si(128)...H(146) | 249.8(6)   | 13.3(fixed) | — | -0.4 | 13.3 |
| <i>u</i> <sub>178</sub> | Si(3)...H(18)    | 249.8(6)   | 13.3(fixed) | — | -0.4 | 13.3 |
| <i>u</i> <sub>203</sub> | Si(127)...H(134) | 249.8(6)   | 13.2(fixed) | — | -0.4 | 13.2 |
| <i>u</i> <sub>191</sub> | Si(128)...H(145) | 249.8(6)   | 13.2(fixed) | — | -0.4 | 13.2 |
| <i>u</i> <sub>208</sub> | Si(127)...H(132) | 249.8(6)   | 13.3(fixed) | — | -0.4 | 13.3 |
| <i>u</i> <sub>183</sub> | Si(3)...H(9)     | 249.8(6)   | 13.3(fixed) | — | -0.4 | 13.3 |
| <i>u</i> <sub>211</sub> | Si(65)...H(79)   | 249.8(6)   | 13.1(fixed) | — | -0.4 | 13.1 |
| <i>u</i> <sub>188</sub> | Si(3)...H(16)    | 249.8(6)   | 13.3(fixed) | — | -0.4 | 13.3 |
| <i>u</i> <sub>197</sub> | Si(3)...H(14)    | 249.8(6)   | 13.3(fixed) | — | -0.4 | 13.3 |
| <i>u</i> <sub>217</sub> | Si(3)...H(13)    | 249.8(6)   | 13.2(fixed) | — | -0.4 | 13.2 |
| <i>u</i> <sub>180</sub> | Si(65)...H(80)   | 249.9(6)   | 13.2(fixed) | — | -0.3 | 13.2 |
| <i>u</i> <sub>222</sub> | Si(128)...H(144) | 249.9(6)   | 13.1(fixed) | — | -0.4 | 13.1 |
| <i>u</i> <sub>219</sub> | Si(3)...H(17)    | 249.9(6)   | 13.0(fixed) | — | -0.3 | 13.0 |
| <i>u</i> <sub>210</sub> | Si(65)...H(75)   | 249.9(6)   | 13.3(fixed) | — | -0.4 | 13.3 |
| <i>u</i> <sub>169</sub> | Si(4)...H(22)    | 249.9(6)   | 13.2(fixed) | — | -0.3 | 13.2 |
| <i>u</i> <sub>223</sub> | Si(127)...H(137) | 249.9(6)   | 13.3(fixed) | — | -0.4 | 13.3 |
| <i>u</i> <sub>172</sub> | Si(66)...H(88)   | 249.9(6)   | 13.4(fixed) | — | -0.4 | 13.4 |
| <i>u</i> <sub>193</sub> | Si(66)...H(86)   | 249.9(6)   | 13.3(fixed) | — | -0.4 | 13.3 |
| <i>u</i> <sub>184</sub> | Si(127)...H(136) | 249.9(6)   | 13.3(fixed) | — | -0.4 | 13.3 |
| <i>u</i> <sub>187</sub> | Si(127)...H(138) | 249.9(6)   | 13.3(fixed) | — | -0.4 | 13.3 |
| <i>u</i> <sub>220</sub> | Si(66)...H(87)   | 249.9(6)   | 13.3(fixed) | — | -0.4 | 13.3 |
| <i>u</i> <sub>209</sub> | Si(65)...H(76)   | 249.9(6)   | 13.2(fixed) | — | -0.4 | 13.2 |
| <i>u</i> <sub>174</sub> | Si(65)...H(74)   | 249.9(6)   | 13.2(fixed) | — | -0.3 | 13.2 |
| <i>u</i> <sub>215</sub> | Si(4)...H(25)    | 250.0(6)   | 13.5(fixed) | — | -0.4 | 13.5 |
| <i>u</i> <sub>207</sub> | Si(4)...H(24)    | 250.0(6)   | 13.4(fixed) | — | -0.4 | 13.4 |
| <i>u</i> <sub>181</sub> | Si(128)...H(150) | 250.0(6)   | 13.3(fixed) | — | -0.4 | 13.3 |
| <i>u</i> <sub>205</sub> | Si(128)...H(148) | 250.0(6)   | 13.2(fixed) | — | -0.4 | 13.2 |
| <i>u</i> <sub>212</sub> | Si(128)...H(149) | 250.0(6)   | 13.3(fixed) | — | -0.4 | 13.3 |
| <i>u</i> <sub>167</sub> | Si(4)...H(26)    | 250.0(6)   | 13.3(fixed) | — | -0.3 | 13.3 |
| <i>u</i> <sub>228</sub> | Si(125)...H(182) | 254.3(17)  | 14.0(fixed) | — | -0.3 | 14.0 |
| <i>u</i> <sub>218</sub> | Si(125)...H(183) | 254.3(17)  | 13.5(fixed) | — | -0.4 | 13.5 |
| <i>u</i> <sub>225</sub> | Si(125)...H(181) | 254.4(17)  | 13.0(fixed) | — | -0.3 | 13.0 |
| <i>u</i> <sub>327</sub> | H(75)...H(91)    | 254.4(165) | 84.4(fixed) | — | 22.5 | 84.4 |
| <i>u</i> <sub>221</sub> | Si(1)...H(59)    | 254.7(17)  | 13.1(fixed) | — | -0.3 | 13.1 |
| <i>u</i> <sub>226</sub> | Si(1)...H(58)    | 254.8(17)  | 13.0(fixed) | — | -0.3 | 13.0 |

|                         |                 |            |                                        |   |      |      |
|-------------------------|-----------------|------------|----------------------------------------|---|------|------|
| <i>u</i> <sub>230</sub> | Si(1)...H(57)   | 254.8(17)  | 13.0(fixed)                            | — | -0.3 | 13.0 |
| <i>u</i> <sub>214</sub> | Si(63)...H(121) | 254.8(17)  | 13.1(fixed)                            | — | -0.3 | 13.1 |
| <i>u</i> <sub>231</sub> | Si(63)...H(119) | 254.8(17)  | 13.0(fixed)                            | — | -0.3 | 13.0 |
| <i>u</i> <sub>229</sub> | Si(63)...H(120) | 254.9(17)  | 13.0(fixed)                            | — | -0.3 | 13.0 |
| <i>u</i> <sub>250</sub> | H(76)...H(87)   | 256.8(104) | 74.9(fixed)                            | — | 27.0 | 74.9 |
| <i>u</i> <sub>234</sub> | H(72)...H(107)  | 256.8(141) | 67.7(fixed)                            | — | 44.2 | 67.7 |
| <i>u</i> <sub>246</sub> | H(72)...H(119)  | 260.4(154) | 79.9(fixed)                            | — | 21.4 | 79.9 |
| <i>u</i> <sub>266</sub> | H(30)...H(54)   | 260.5(166) | 88.5(fixed)                            | — | 29.0 | 88.5 |
| <i>u</i> <sub>244</sub> | H(70)...H(106)  | 262.0(168) | 71.9(fixed)                            | — | 35.7 | 71.9 |
| <i>u</i> <sub>316</sub> | H(134)...H(182) | 263.6(120) | 88.4(fixed)                            | — | 21.4 | 88.4 |
| <i>u</i> <sub>240</sub> | H(79)...H(119)  | 264.1(122) | 59.1(fixed)                            | — | 22.0 | 59.1 |
| <i>u</i> <sub>258</sub> | H(17)...H(45)   | 272.0(122) | 85.6(fixed)                            | — | 24.4 | 85.6 |
| <i>u</i> <sub>415</sub> | H(70)...H(107)  | 273.5(141) | 96.8(fixed)                            | — | 16.2 | 96.8 |
| <i>u</i> <sub>318</sub> | H(154)...H(181) | 276.9(68)  | 71.0(fixed)                            | — | 22.7 | 71.0 |
| <i>u</i> <sub>233</sub> | H(79)...H(120)  | 280.0(120) | 56.6(fixed)                            | — | 26.7 | 56.6 |
| <i>u</i> <sub>163</sub> | H(141)...H(182) | 280.4(109) | 81.2(fixed)                            | — | 37.3 | 81.2 |
| <i>u</i> <sub>241</sub> | H(13)...H(24)   | 280.5(128) | 74.5(fixed)                            | — | 32.1 | 74.5 |
| <i>u</i> <sub>542</sub> | H(141)...H(166) | 281.3(230) | 82.1(fixed)                            | — | 3.6  | 82.1 |
| <i>u</i> <sub>162</sub> | H(75)...H(87)   | 281.7(148) | 62.0(fixed)                            | — | 39.1 | 62.0 |
| <i>u</i> <sub>247</sub> | H(86)...H(124)  | 282.2(41)  | 57.9(fixed)                            | — | 18.5 | 57.9 |
| <i>u</i> <sub>148</sub> | H(144)...H(178) | 283.7(228) | 46.1(fixed)                            | — | 26.2 | 46.1 |
| <i>u</i> <sub>254</sub> | H(16)...H(57)   | 284.3(106) | 70.5(fixed)                            | — | 15.4 | 70.5 |
| <i>u</i> <sub>251</sub> | H(137)...H(148) | 284.3(128) | 67.3(fixed)                            | — | 19.5 | 67.3 |
| <i>u</i> <sub>243</sub> | H(14)...H(62)   | 284.6(66)  | 66.0(fixed)                            | — | 17.0 | 66.0 |
| <i>u</i> <sub>235</sub> | H(132)...H(149) | 286.3(165) | 65.2(fixed)                            | — | 25.5 | 65.2 |
| <i>u</i> <sub>428</sub> | H(120)...H(123) | 287.6(107) | 52.1(fixed)                            | — | 10.4 | 52.1 |
| <i>u</i> <sub>262</sub> | H(138)...H(186) | 288.1(66)  | 61.6(fixed)                            | — | 16.9 | 61.6 |
| <i>u</i> <sub>149</sub> | H(82)...H(116)  | 288.5(218) | 57.7(fixed)                            | — | 33.4 | 57.7 |
| <i>u</i> <sub>271</sub> | H(72)...H(106)  | 291.0(246) | 82.9(fixed)                            | — | 18.9 | 82.9 |
| <i>u</i> <sub>248</sub> | H(78)...H(123)  | 291.3(58)  | 55.1(fixed)                            | — | 18.6 | 55.1 |
| <i>u</i> <sub>384</sub> | C(143)...H(168) | 292.7(227) | 50.9(fixed)                            | — | 13.7 | 50.9 |
| <i>u</i> <sub>257</sub> | H(133)...H(142) | 296.7(30)  | 38.7(fixed)                            | — | 8.6  | 38.7 |
| <i>u</i> <sub>277</sub> | C(11)...C(15)   | 296.8(26)  | 11.8(4)                                | — | -0.3 | 12.5 |
| <i>u</i> <sub>263</sub> | H(145)...H(178) | 297.2(86)  | 70.5(fixed)                            | — | 21.6 | 70.5 |
| <i>u</i> <sub>253</sub> | H(134)...H(153) | 297.8(126) | 70.0(fixed)                            | — | 19.5 | 70.0 |
| <i>u</i> <sub>284</sub> | C(73)...C(77)   | 298.1(26)  | 11.9(tied to <i>u</i> <sub>277</sub> ) | — | -0.3 | 12.6 |
| <i>u</i> <sub>338</sub> | H(134)...H(181) | 298.7(90)  | 82.5(fixed)                            | — | 21.2 | 82.5 |
| <i>u</i> <sub>259</sub> | H(146)...H(150) | 298.9(24)  | 39.3(fixed)                            | — | 9.6  | 39.3 |
| <i>u</i> <sub>310</sub> | H(14)...H(16)   | 299.0(57)  | 46.3(fixed)                            | — | 8.2  | 46.3 |
| <i>u</i> <sub>281</sub> | C(135)...C(139) | 299.0(25)  | 12.0(tied to <i>u</i> <sub>277</sub> ) | — | -0.3 | 12.7 |
| <i>u</i> <sub>288</sub> | C(23)...C(27)   | 299.1(21)  | 12.4(tied to <i>u</i> <sub>277</sub> ) | — | -0.4 | 13.1 |
| <i>u</i> <sub>393</sub> | C(55)...H(61)   | 299.2(81)  | 40.4(fixed)                            | — | 5.6  | 40.4 |
| <i>u</i> <sub>255</sub> | H(22)...H(26)   | 299.3(24)  | 40.4(fixed)                            | — | 8.9  | 40.4 |
| <i>u</i> <sub>252</sub> | H(21)...H(60)   | 299.5(51)  | 58.9(fixed)                            | — | 19.8 | 58.9 |
| <i>u</i> <sub>283</sub> | C(131)...C(139) | 299.6(9)   | 11.9(tied to <i>u</i> <sub>277</sub> ) | — | -0.3 | 12.6 |
| <i>u</i> <sub>293</sub> | C(147)...C(151) | 299.9(21)  | 12.0(tied to <i>u</i> <sub>277</sub> ) | — | -0.3 | 12.6 |

|                         |                 |            |                                        |   |      |      |
|-------------------------|-----------------|------------|----------------------------------------|---|------|------|
| <i>u</i> <sub>269</sub> | H(136)...H(142) | 300.0(45)  | 41.0(fixed)                            | — | 6.7  | 41.0 |
| <i>u</i> <sub>150</sub> | H(140)...H(165) | 300.0(176) | 56.7(fixed)                            | — | 34.8 | 56.7 |
| <i>u</i> <sub>161</sub> | H(17)...H(44)   | 300.1(131) | 62.7(fixed)                            | — | 35.5 | 62.7 |
| <i>u</i> <sub>295</sub> | C(85)...C(89)   | 300.6(21)  | 12.1(tied to <i>u</i> <sub>277</sub> ) | — | -0.3 | 12.8 |
| <i>u</i> <sub>276</sub> | C(143)...C(147) | 300.9(11)  | 11.7(tied to <i>u</i> <sub>277</sub> ) | — | -0.3 | 12.3 |
| <i>u</i> <sub>311</sub> | H(149)...H(153) | 301.0(50)  | 43.0(fixed)                            | — | 8.3  | 43.0 |
| <i>u</i> <sub>261</sub> | H(74)...H(80)   | 301.3(47)  | 39.1(fixed)                            | — | 7.4  | 39.1 |
| <i>u</i> <sub>279</sub> | C(81)...C(85)   | 301.6(11)  | 11.9(tied to <i>u</i> <sub>277</sub> ) | — | -0.3 | 12.5 |
| <i>u</i> <sub>275</sub> | C(19)...C(23)   | 302.3(11)  | 12.2(tied to <i>u</i> <sub>277</sub> ) | — | -0.4 | 12.9 |
| <i>u</i> <sub>317</sub> | C(15)...H(57)   | 302.6(83)  | 45.8(fixed)                            | — | 13.2 | 45.8 |
| <i>u</i> <sub>290</sub> | C(69)...C(73)   | 303.0(9)   | 12.0(tied to <i>u</i> <sub>277</sub> ) | — | -0.3 | 12.7 |
| <i>u</i> <sub>299</sub> | C(19)...C(27)   | 304.3(4)   | 12.2(tied to <i>u</i> <sub>277</sub> ) | — | -0.4 | 12.9 |
| <i>u</i> <sub>312</sub> | H(25)...H(29)   | 304.4(50)  | 45.0(fixed)                            | — | 9.3  | 45.0 |
| <i>u</i> <sub>297</sub> | C(81)...C(89)   | 304.8(4)   | 12.1(tied to <i>u</i> <sub>277</sub> ) | — | -0.3 | 12.7 |
| <i>u</i> <sub>294</sub> | C(7)...C(11)    | 304.9(9)   | 12.2(tied to <i>u</i> <sub>277</sub> ) | — | -0.3 | 12.9 |
| <i>u</i> <sub>308</sub> | H(137)...C(147) | 305.0(84)  | 48.6(fixed)                            | — | 16.5 | 48.6 |
| <i>u</i> <sub>298</sub> | C(69)...C(77)   | 305.2(9)   | 12.0(tied to <i>u</i> <sub>277</sub> ) | — | -0.3 | 12.7 |
| <i>u</i> <sub>303</sub> | C(131)...C(135) | 305.7(9)   | 12.2(tied to <i>u</i> <sub>277</sub> ) | — | -0.3 | 12.9 |
| <i>u</i> <sub>334</sub> | H(76)...H(78)   | 305.7(57)  | 42.6(fixed)                            | — | 5.3  | 42.6 |
| <i>u</i> <sub>238</sub> | H(92)...H(116)  | 306.1(316) | 72.9(fixed)                            | — | 25.8 | 72.9 |
| <i>u</i> <sub>245</sub> | H(70)...H(91)   | 306.1(120) | 75.6(fixed)                            | — | 32.1 | 75.6 |
| <i>u</i> <sub>304</sub> | C(143)...C(151) | 306.1(4)   | 12.2(tied to <i>u</i> <sub>277</sub> ) | — | -0.3 | 12.9 |
| <i>u</i> <sub>273</sub> | H(88)...H(90)   | 306.4(36)  | 40.7(fixed)                            | — | 8.8  | 40.7 |
| <i>u</i> <sub>282</sub> | H(9)...H(18)    | 306.5(30)  | 44.4(fixed)                            | — | 9.3  | 44.4 |
| <i>u</i> <sub>306</sub> | C(7)...C(15)    | 306.6(9)   | 12.2(tied to <i>u</i> <sub>277</sub> ) | — | -0.3 | 12.9 |
| <i>u</i> <sub>270</sub> | H(84)...H(88)   | 307.1(23)  | 42.2(fixed)                            | — | 8.1  | 42.2 |
| <i>u</i> <sub>319</sub> | H(24)...H(62)   | 307.4(84)  | 70.6(fixed)                            | — | 19.9 | 70.6 |
| <i>u</i> <sub>265</sub> | H(12)...H(18)   | 307.6(46)  | 40.2(fixed)                            | — | 9.9  | 40.2 |
| <i>u</i> <sub>426</sub> | H(57)...H(61)   | 307.7(76)  | 56.0(fixed)                            | — | 6.5  | 56.0 |
| <i>u</i> <sub>260</sub> | H(145)...H(184) | 307.8(51)  | 64.0(fixed)                            | — | 16.7 | 64.0 |
| <i>u</i> <sub>292</sub> | H(71)...H(80)   | 308.6(31)  | 39.1(fixed)                            | — | 7.1  | 39.1 |
| <i>u</i> <sub>280</sub> | H(26)...H(28)   | 308.9(35)  | 45.1(fixed)                            | — | 8.8  | 45.1 |
| <i>u</i> <sub>278</sub> | H(71)...H(74)   | 309.2(37)  | 40.9(fixed)                            | — | 6.2  | 40.9 |
| <i>u</i> <sub>274</sub> | H(13)...C(23)   | 309.5(78)  | 46.8(fixed)                            | — | 27.8 | 46.8 |
| <i>u</i> <sub>272</sub> | H(84)...H(90)   | 310.0(29)  | 42.3(fixed)                            | — | 8.0  | 42.3 |
| <i>u</i> <sub>548</sub> | H(79)...H(123)  | 310.3(66)  | 70.7(fixed)                            | — | 4.7  | 70.7 |
| <i>u</i> <sub>469</sub> | C(139)...H(166) | 310.4(184) | 64.2(fixed)                            | — | 12.0 | 64.2 |
| <i>u</i> <sub>301</sub> | H(146)...H(152) | 310.5(26)  | 42.8(fixed)                            | — | 7.2  | 42.8 |
| <i>u</i> <sub>236</sub> | H(10)...H(54)   | 310.8(167) | 87.6(fixed)                            | — | 34.0 | 87.6 |
| <i>u</i> <sub>326</sub> | H(87)...H(91)   | 311.0(51)  | 45.3(fixed)                            | — | 7.4  | 45.3 |
| <i>u</i> <sub>309</sub> | C(131)...H(153) | 311.3(116) | 44.7(fixed)                            | — | 17.9 | 44.7 |
| <i>u</i> <sub>305</sub> | H(138)...H(140) | 311.6(56)  | 42.2(fixed)                            | — | 6.3  | 42.2 |
| <i>u</i> <sub>346</sub> | H(136)...C(139) | 312.0(35)  | 28.3(fixed)                            | — | 0.9  | 28.3 |
| <i>u</i> <sub>249</sub> | H(8)...H(25)    | 312.1(160) | 80.9(fixed)                            | — | 33.1 | 80.9 |
| <i>u</i> <sub>300</sub> | H(83)...H(86)   | 312.3(31)  | 44.9(fixed)                            | — | 7.4  | 44.9 |
| <i>u</i> <sub>287</sub> | H(22)...H(28)   | 312.4(28)  | 43.1(fixed)                            | — | 8.0  | 43.1 |

|                         |                 |            |             |   |      |      |
|-------------------------|-----------------|------------|-------------|---|------|------|
| <i>u</i> <sub>314</sub> | H(70)...H(75)   | 312.7(42)  | 41.8(fixed) | — | 5.8  | 41.8 |
| <i>u</i> <sub>325</sub> | H(132)...H(137) | 312.7(40)  | 44.3(fixed) | — | 7.1  | 44.3 |
| <i>u</i> <sub>372</sub> | C(11)...H(16)   | 312.7(37)  | 30.5(fixed) | — | 0.7  | 30.5 |
| <i>u</i> <sub>429</sub> | H(78)...H(124)  | 313.1(64)  | 65.4(fixed) | — | 9.1  | 65.4 |
| <i>u</i> <sub>291</sub> | H(150)...H(152) | 313.9(36)  | 43.1(fixed) | — | 8.3  | 43.1 |
| <i>u</i> <sub>335</sub> | H(74)...C(77)   | 314.0(37)  | 26.2(fixed) | — | 1.0  | 26.2 |
| <i>u</i> <sub>332</sub> | C(131)...H(142) | 315.0(15)  | 26.4(fixed) | — | 0.9  | 26.4 |
| <i>u</i> <sub>286</sub> | H(9)...H(12)    | 315.0(36)  | 44.0(fixed) | — | 9.1  | 44.0 |
| <i>u</i> <sub>331</sub> | H(133)...C(139) | 315.9(21)  | 27.1(fixed) | — | 1.6  | 27.1 |
| <i>u</i> <sub>391</sub> | C(73)...H(78)   | 316.1(37)  | 29.3(fixed) | — | 0.2  | 29.3 |
| <i>u</i> <sub>315</sub> | H(8)...H(13)    | 316.1(41)  | 45.5(fixed) | — | 8.5  | 45.5 |
| <i>u</i> <sub>340</sub> | H(12)...C(15)   | 316.2(36)  | 28.1(fixed) | — | 1.5  | 28.1 |
| <i>u</i> <sub>329</sub> | H(20)...H(30)   | 316.5(32)  | 43.5(fixed) | — | 7.4  | 43.5 |
| <i>u</i> <sub>323</sub> | H(146)...C(147) | 316.6(15)  | 25.4(fixed) | — | 1.5  | 25.4 |
| <i>u</i> <sub>389</sub> | C(147)...H(153) | 316.7(36)  | 29.0(fixed) | — | 0.7  | 29.0 |
| <i>u</i> <sub>344</sub> | H(134)...H(141) | 317.0(38)  | 44.4(fixed) | — | 5.8  | 44.4 |
| <i>u</i> <sub>289</sub> | C(73)...H(87)   | 317.0(102) | 47.4(fixed) | — | 26.8 | 47.4 |
| <i>u</i> <sub>339</sub> | C(143)...H(150) | 317.1(14)  | 28.7(fixed) | — | 1.4  | 28.7 |
| <i>u</i> <sub>356</sub> | C(135)...H(140) | 317.2(36)  | 27.4(fixed) | — | 0.5  | 27.4 |
| <i>u</i> <sub>380</sub> | H(14)...C(15)   | 317.3(40)  | 31.6(fixed) | — | 0.6  | 31.6 |
| <i>u</i> <sub>374</sub> | H(25)...C(27)   | 317.3(31)  | 29.7(fixed) | — | 1.1  | 29.7 |
| <i>u</i> <sub>328</sub> | H(22)...C(23)   | 317.7(15)  | 26.8(fixed) | — | 1.1  | 26.8 |
| <i>u</i> <sub>355</sub> | C(85)...H(90)   | 317.8(29)  | 28.0(fixed) | — | 1.1  | 28.0 |
| <i>u</i> <sub>324</sub> | C(19)...H(26)   | 318.1(15)  | 28.8(fixed) | — | 1.4  | 28.8 |
| <i>u</i> <sub>385</sub> | H(149)...C(151) | 318.3(31)  | 29.2(fixed) | — | 1.1  | 29.2 |
| <i>u</i> <sub>446</sub> | C(69)...H(107)  | 318.4(98)  | 63.7(fixed) | — | 22.0 | 63.7 |
| <i>u</i> <sub>425</sub> | C(7)...H(44)    | 318.5(123) | 60.9(fixed) | — | 20.4 | 60.9 |
| <i>u</i> <sub>302</sub> | H(133)...H(136) | 318.8(36)  | 42.7(fixed) | — | 7.5  | 42.7 |
| <i>u</i> <sub>343</sub> | C(81)...H(88)   | 319.2(14)  | 28.7(fixed) | — | 1.1  | 28.7 |
| <i>u</i> <sub>313</sub> | H(16)...H(61)   | 319.3(57)  | 65.1(fixed) | — | 17.2 | 65.1 |
| <i>u</i> <sub>351</sub> | C(23)...H(28)   | 319.4(29)  | 30.1(fixed) | — | 1.2  | 30.1 |
| <i>u</i> <sub>347</sub> | H(82)...H(92)   | 319.7(30)  | 43.7(fixed) | — | 6.5  | 43.7 |
| <i>u</i> <sub>396</sub> | C(23)...H(29)   | 319.8(36)  | 30.6(fixed) | — | 1.0  | 30.6 |
| <i>u</i> <sub>430</sub> | C(135)...H(149) | 319.8(77)  | 50.9(fixed) | — | 9.4  | 50.9 |
| <i>u</i> <sub>422</sub> | H(132)...C(151) | 319.9(121) | 44.7(fixed) | — | 11.7 | 44.7 |
| <i>u</i> <sub>285</sub> | H(79)...C(117)  | 320.0(92)  | 45.3(fixed) | — | 20.4 | 45.3 |
| <i>u</i> <sub>402</sub> | H(87)...C(89)   | 320.3(31)  | 30.7(fixed) | — | 0.6  | 30.7 |
| <i>u</i> <sub>342</sub> | C(73)...H(80)   | 320.3(32)  | 27.3(fixed) | — | 1.0  | 27.3 |
| <i>u</i> <sub>322</sub> | H(145)...H(148) | 320.4(31)  | 44.5(fixed) | — | 7.0  | 44.5 |
| <i>u</i> <sub>496</sub> | H(70)...C(105)  | 320.5(104) | 72.3(fixed) | — | 19.6 | 72.3 |
| <i>u</i> <sub>357</sub> | C(143)...H(152) | 320.8(19)  | 28.6(fixed) | — | 1.1  | 28.6 |
| <i>u</i> <sub>348</sub> | H(71)...C(73)   | 320.9(21)  | 28.0(fixed) | — | 0.8  | 28.0 |
| <i>u</i> <sub>364</sub> | H(72)...C(105)  | 321.0(168) | 57.7(fixed) | — | 25.5 | 57.7 |
| <i>u</i> <sub>345</sub> | C(11)...H(18)   | 321.2(31)  | 27.6(fixed) | — | 1.3  | 27.6 |
| <i>u</i> <sub>352</sub> | C(135)...H(142) | 321.6(30)  | 27.2(fixed) | — | 0.4  | 27.2 |
| <i>u</i> <sub>350</sub> | H(84)...C(89)   | 321.7(11)  | 28.9(fixed) | — | 0.9  | 28.9 |

|                         |                 |            |              |   |      |       |
|-------------------------|-----------------|------------|--------------|---|------|-------|
| <i>u</i> <sub>370</sub> | H(26)...C(27)   | 321.8(23)  | 30.7(fixed)  | — | 0.5  | 30.7  |
| <i>u</i> <sub>353</sub> | H(83)...C(85)   | 321.9(19)  | 28.2(fixed)  | — | 0.9  | 28.2  |
| <i>u</i> <sub>264</sub> | H(148)...H(186) | 322.2(78)  | 61.9(fixed)  | — | 21.5 | 61.9  |
| <i>u</i> <sub>358</sub> | C(19)...H(28)   | 322.3(20)  | 30.6(fixed)  | — | 1.2  | 30.6  |
| <i>u</i> <sub>377</sub> | C(69)...H(80)   | 322.3(15)  | 26.9(fixed)  | — | 0.8  | 26.9  |
| <i>u</i> <sub>375</sub> | C(7)...H(18)    | 322.4(15)  | 30.1(fixed)  | — | 0.9  | 30.1  |
| <i>u</i> <sub>321</sub> | H(72)...H(79)   | 322.4(37)  | 42.4(fixed)  | — | 6.3  | 42.4  |
| <i>u</i> <sub>369</sub> | C(69)...H(75)   | 322.7(26)  | 27.9(fixed)  | — | 0.6  | 27.9  |
| <i>u</i> <sub>360</sub> | H(88)...C(89)   | 322.7(24)  | 27.8(fixed)  | — | 1.2  | 27.8  |
| <i>u</i> <sub>371</sub> | H(150)...C(151) | 322.7(23)  | 29.8(fixed)  | — | 0.9  | 29.8  |
| <i>u</i> <sub>410</sub> | H(76)...C(77)   | 322.7(41)  | 28.1(fixed)  | — | 0.0  | 28.1  |
| <i>u</i> <sub>354</sub> | H(84)...C(85)   | 323.4(14)  | 28.1(fixed)  | — | 0.7  | 28.1  |
| <i>u</i> <sub>330</sub> | H(21)...H(24)   | 323.5(31)  | 44.6(fixed)  | — | 6.3  | 44.6  |
| <i>u</i> <sub>359</sub> | H(9)...C(15)    | 323.9(20)  | 29.3(fixed)  | — | 1.4  | 29.3  |
| <i>u</i> <sub>337</sub> | H(144)...H(154) | 324.1(32)  | 42.4(fixed)  | — | 6.7  | 42.4  |
| <i>u</i> <sub>400</sub> | H(20)...C(27)   | 324.2(13)  | 28.4(fixed)  | — | 0.5  | 28.4  |
| <i>u</i> <sub>362</sub> | C(147)...H(152) | 324.3(29)  | 28.4(fixed)  | — | 0.9  | 28.4  |
| <i>u</i> <sub>417</sub> | C(131)...H(137) | 324.6(25)  | 29.4(fixed)  | — | 0.3  | 29.4  |
| <i>u</i> <sub>409</sub> | H(134)...C(139) | 324.9(25)  | 30.8(fixed)  | — | 0.2  | 30.8  |
| <i>u</i> <sub>406</sub> | C(85)...H(91)   | 324.9(36)  | 30.4(fixed)  | — | 0.4  | 30.4  |
| <i>u</i> <sub>366</sub> | C(7)...H(12)    | 325.4(23)  | 29.7(fixed)  | — | 1.0  | 29.7  |
| <i>u</i> <sub>404</sub> | C(131)...H(141) | 325.5(20)  | 28.2(fixed)  | — | 0.0  | 28.2  |
| <i>u</i> <sub>367</sub> | H(71)...C(77)   | 325.6(21)  | 26.7(fixed)  | — | 0.8  | 26.7  |
| <i>u</i> <sub>378</sub> | C(69)...H(74)   | 325.7(23)  | 27.4(fixed)  | — | 0.3  | 27.4  |
| <i>u</i> <sub>379</sub> | C(81)...H(86)   | 325.7(19)  | 31.3(fixed)  | — | 0.4  | 31.3  |
| <i>u</i> <sub>444</sub> | C(11)...H(25)   | 325.9(75)  | 57.7(fixed)  | — | 18.3 | 57.7  |
| <i>u</i> <sub>386</sub> | H(8)...C(11)    | 326.0(24)  | 30.9(fixed)  | — | 0.9  | 30.9  |
| <i>u</i> <sub>408</sub> | C(81)...H(92)   | 326.2(21)  | 30.3(fixed)  | — | 0.5  | 30.3  |
| <i>u</i> <sub>267</sub> | C(139)...H(165) | 326.2(148) | 44.0(fixed)  | — | 26.0 | 44.0  |
| <i>u</i> <sub>394</sub> | H(144)...C(151) | 326.7(13)  | 28.4(fixed)  | — | 0.7  | 28.4  |
| <i>u</i> <sub>361</sub> | C(81)...H(90)   | 326.7(20)  | 28.1(fixed)  | — | 0.9  | 28.1  |
| <i>u</i> <sub>387</sub> | C(143)...H(148) | 326.7(19)  | 30.0(fixed)  | — | 0.7  | 30.0  |
| <i>u</i> <sub>468</sub> | H(17)...C(55)   | 327.0(76)  | 50.9(fixed)  | — | 9.3  | 50.9  |
| <i>u</i> <sub>363</sub> | H(9)...C(11)    | 327.1(21)  | 29.6(fixed)  | — | 1.2  | 29.6  |
| <i>u</i> <sub>388</sub> | H(133)...C(135) | 327.1(21)  | 29.6(fixed)  | — | 0.6  | 29.6  |
| <i>u</i> <sub>405</sub> | H(70)...C(73)   | 327.3(25)  | 28.7(fixed)  | — | 0.2  | 28.7  |
| <i>u</i> <sub>421</sub> | C(69)...H(106)  | 327.3(186) | 57.5(fixed)  | — | 20.9 | 57.5  |
| <i>u</i> <sub>376</sub> | H(138)...C(139) | 327.4(39)  | 29.4(fixed)  | — | 0.5  | 29.4  |
| <i>u</i> <sub>398</sub> | H(145)...C(147) | 327.4(19)  | 29.7(fixed)  | — | 0.1  | 29.7  |
| <i>u</i> <sub>440</sub> | H(10)...C(43)   | 327.5(130) | 55.5(fixed)  | — | 19.2 | 55.5  |
| <i>u</i> <sub>395</sub> | C(7)...H(13)    | 327.6(26)  | 30.4(fixed)  | — | 0.8  | 30.4  |
| <i>u</i> <sub>392</sub> | H(132)...C(135) | 327.6(24)  | 29.5(fixed)  | — | 0.9  | 29.5  |
| <i>u</i> <sub>519</sub> | H(10)...H(29)   | 327.6(125) | 103.4(fixed) | — | 21.2 | 103.4 |
| <i>u</i> <sub>382</sub> | H(22)...C(27)   | 327.7(11)  | 27.5(fixed)  | — | 0.5  | 27.5  |
| <i>u</i> <sub>256</sub> | H(76)...H(124)  | 328.6(74)  | 59.6(fixed)  | — | 17.7 | 59.6  |
| <i>u</i> <sub>403</sub> | H(72)...C(77)   | 328.6(24)  | 28.4(fixed)  | — | 0.4  | 28.4  |



|                         |                  |            |                                        |          |      |      |
|-------------------------|------------------|------------|----------------------------------------|----------|------|------|
| <i>u</i> <sub>397</sub> | H(146)...C(151)  | 329.1(11)  | 29.2(fixed)                            | —        | 0.3  | 29.2 |
| <i>u</i> <sub>399</sub> | C(19)...H(24)    | 329.1(18)  | 30.4(fixed)                            | —        | 0.3  | 30.4 |
| <i>u</i> <sub>390</sub> | H(21)...C(23)    | 329.5(19)  | 29.6(fixed)                            | —        | 0.0  | 29.6 |
| <i>u</i> <sub>411</sub> | C(19)...H(30)    | 329.8(22)  | 29.8(fixed)                            | —        | 0.8  | 29.8 |
| <i>u</i> <sub>463</sub> | H(136)...H(140)  | 329.8(51)  | 44.5(fixed)                            | —        | -1.0 | 44.5 |
| <i>u</i> <sub>452</sub> | C(77)...H(123)   | 329.9(47)  | 45.9(fixed)                            | —        | 6.2  | 45.9 |
| <i>u</i> <sub>451</sub> | H(87)...H(124)   | 330.3(97)  | 72.7(fixed)                            | —        | 5.5  | 72.7 |
| <i>u</i> <sub>368</sub> | C(131)...H(136)  | 330.5(23)  | 27.7(fixed)                            | —        | 1.0  | 27.7 |
| <i>u</i> <sub>349</sub> | H(10)...H(17)    | 330.7(38)  | 44.6(fixed)                            | —        | 7.7  | 44.6 |
| <i>u</i> <sub>423</sub> | H(82)...C(89)    | 331.6(13)  | 27.9(fixed)                            | —        | 0.3  | 27.9 |
| <i>u</i> <sub>579</sub> | C(7)...H(29)     | 331.8(116) | 89.4(fixed)                            | —        | 16.8 | 89.4 |
| <i>u</i> <sub>535</sub> | H(134)...C(179)  | 332.1(84)  | 69.2(fixed)                            | —        | 14.9 | 69.2 |
| <i>u</i> <sub>401</sub> | C(69)...H(79)    | 332.2(19)  | 28.9(fixed)                            | —        | 0.4  | 28.9 |
| <i>u</i> <sub>470</sub> | H(12)...H(16)    | 332.7(51)  | 49.4(fixed)                            | —        | -1.5 | 49.4 |
| <i>u</i> <sub>434</sub> | H(78)...C(118)   | 332.8(37)  | 45.9(fixed)                            | —        | 9.5  | 45.9 |
| <i>u</i> <sub>424</sub> | H(10)...C(15)    | 333.7(25)  | 30.7(fixed)                            | —        | 0.5  | 30.7 |
| <i>u</i> <sub>471</sub> | H(74)...H(78)    | 333.8(50)  | 44.1(fixed)                            | —        | -1.3 | 44.1 |
| <i>u</i> <sub>460</sub> | Si(1)...C(56)    | 334.0(26)  | 16.3(tied to <i>u</i> <sub>447</sub> ) | —        | -0.3 | 14.6 |
| <i>u</i> <sub>433</sub> | C(85)...H(124)   | 334.3(53)  | 44.8(fixed)                            | —        | 5.9  | 44.8 |
| <i>u</i> <sub>416</sub> | C(7)...H(17)     | 335.1(19)  | 29.3(fixed)                            | —        | 0.7  | 29.3 |
| <i>u</i> <sub>307</sub> | H(17)...C(43)    | 335.3(100) | 56.8(fixed)                            | —        | 24.0 | 56.8 |
| <i>u</i> <sub>419</sub> | C(143)...H(154)  | 336.0(22)  | 28.9(fixed)                            | —        | 0.4  | 28.9 |
| <i>u</i> <sub>237</sub> | H(29)...H(54)    | 336.5(149) | 75.5(fixed)                            | —        | 59.5 | 75.5 |
| <i>u</i> <sub>333</sub> | H(83)...H(122)   | 336.8(75)  | 65.7(fixed)                            | —        | 13.5 | 65.7 |
| <i>u</i> <sub>296</sub> | C(143)...H(178)  | 337.3(156) | 45.3(fixed)                            | —        | 19.3 | 45.3 |
| <i>u</i> <sub>427</sub> | H(86)...C(118)   | 337.8(41)  | 43.8(fixed)                            | —        | 10.9 | 43.8 |
| <i>u</i> <sub>607</sub> | H(144)...H(170)  | 338.4(205) | 64.3(fixed)                            | —        | 12.0 | 64.3 |
| <i>u</i> <sub>500</sub> | H(87)...H(90)    | 338.6(41)  | 48.6(fixed)                            | —        | -1.4 | 48.6 |
| <i>u</i> <sub>485</sub> | C(77)...H(119)   | 338.8(98)  | 47.8(fixed)                            | —        | 6.7  | 47.8 |
| <i>u</i> <sub>472</sub> | H(25)...H(28)    | 339.2(40)  | 49.8(fixed)                            | —        | -1.1 | 49.8 |
| <i>u</i> <sub>488</sub> | Si(125)...C(180) | 339.3(26)  | 19.3(tied to <i>u</i> <sub>447</sub> ) | —        | -0.5 | 17.3 |
| <i>u</i> <sub>544</sub> | C(69)...H(119)   | 339.4(124) | 66.8(fixed)                            | —        | 7.9  | 66.8 |
| <i>u</i> <sub>320</sub> | H(82)...H(115)   | 339.7(90)  | 88.9(fixed)                            | —        | 20.2 | 88.9 |
| <i>u</i> <sub>487</sub> | Si(63)...C(118)  | 339.9(26)  | 17.0(tied to <i>u</i> <sub>447</sub> ) | —        | -0.3 | 15.3 |
| <i>u</i> <sub>476</sub> | H(144)...H(152)  | 340.6(30)  | 46.2(fixed)                            | —        | -0.7 | 46.2 |
| <i>u</i> <sub>420</sub> | H(86)...H(122)   | 340.7(92)  | 57.8(fixed)                            | —        | 12.4 | 57.8 |
| <i>u</i> <sub>459</sub> | H(83)...H(88)    | 341.3(22)  | 45.8(fixed)                            | —        | -1.0 | 45.8 |
| <i>u</i> <sub>666</sub> | C(73)...H(91)    | 341.5(133) | 70.4(fixed)                            | —        | 10.6 | 70.4 |
| <i>u</i> <sub>442</sub> | Si(65)...C(118)  | 341.5(19)  | 16.7(tied to <i>u</i> <sub>447</sub> ) | —        | -0.3 | 15.0 |
| <i>u</i> <sub>412</sub> | C(11)...H(62)    | 341.5(56)  | 48.3(fixed)                            | —        | 5.8  | 48.3 |
| <i>u</i> <sub>439</sub> | H(138)...C(180)  | 341.7(49)  | 46.9(fixed)                            | —        | 8.0  | 46.9 |
| <i>u</i> <sub>633</sub> | H(8)...C(27)     | 341.9(119) | 81.7(fixed)                            | —        | 10.5 | 81.7 |
| <i>u</i> <sub>640</sub> | C(131)...H(182)  | 342.0(98)  | 81.0(fixed)                            | —        | 8.8  | 81.0 |
| <i>u</i> <sub>517</sub> | H(150)...H(153)  | 342.2(42)  | 48.4(fixed)                            | —        | -1.8 | 48.4 |
| <i>u</i> <sub>464</sub> | H(71)...H(75)    | 342.9(42)  | 44.4(fixed)                            | —        | -0.9 | 44.4 |
| <i>u</i> <sub>447</sub> | Si(3)...C(56)    | 343.0(19)  | 18.4(4)                                | 16.5(17) | -0.5 | 16.5 |

|                         |                  |            |                                        |   |      |      |
|-------------------------|------------------|------------|----------------------------------------|---|------|------|
| <i>u</i> <sub>418</sub> | H(14)...C(56)    | 343.0(50)  | 51.1(fixed)                            | — | 8.9  | 51.1 |
| <i>u</i> <sub>414</sub> | H(138)...H(185)  | 343.2(72)  | 73.6(fixed)                            | — | 11.2 | 73.6 |
| <i>u</i> <sub>491</sub> | H(20)...H(28)    | 343.2(30)  | 48.2(fixed)                            | — | -1.1 | 48.2 |
| <i>u</i> <sub>564</sub> | H(76)...C(85)    | 343.4(99)  | 61.2(fixed)                            | — | 11.5 | 61.2 |
| <i>u</i> <sub>474</sub> | Si(63)...C(109)  | 343.4(7)   | 16.7(tied to <i>u</i> <sub>447</sub> ) | — | -0.2 | 15.0 |
| <i>u</i> <sub>341</sub> | H(144)...C(175)  | 343.8(146) | 39.4(fixed)                            | — | 15.4 | 39.4 |
| <i>u</i> <sub>493</sub> | H(134)...H(142)  | 344.0(34)  | 46.3(fixed)                            | — | -1.9 | 46.3 |
| <i>u</i> <sub>531</sub> | Si(1)...H(61)    | 344.4(39)  | 29.4(fixed)                            | — | 0.9  | 29.4 |
| <i>u</i> <sub>494</sub> | H(84)...H(92)    | 344.5(31)  | 47.7(fixed)                            | — | -1.4 | 47.7 |
| <i>u</i> <sub>656</sub> | H(75)...C(89)    | 344.8(123) | 67.2(fixed)                            | — | 11.0 | 67.2 |
| <i>u</i> <sub>450</sub> | Si(66)...C(118)  | 344.8(15)  | 17.5(tied to <i>u</i> <sub>447</sub> ) | — | -0.4 | 15.7 |
| <i>u</i> <sub>458</sub> | Si(4)...C(56)    | 345.2(15)  | 17.2(tied to <i>u</i> <sub>447</sub> ) | — | -0.4 | 15.5 |
| <i>u</i> <sub>465</sub> | H(146)...H(148)  | 345.4(21)  | 46.1(fixed)                            | — | -0.9 | 46.1 |
| <i>u</i> <sub>489</sub> | Si(1)...C(47)    | 345.8(7)   | 16.6(tied to <i>u</i> <sub>447</sub> ) | — | -0.2 | 14.9 |
| <i>u</i> <sub>551</sub> | H(153)...H(181)  | 345.9(115) | 78.1(fixed)                            | — | 15.7 | 78.1 |
| <i>u</i> <sub>478</sub> | H(133)...H(141)  | 346.3(34)  | 44.7(fixed)                            | — | -1.2 | 44.7 |
| <i>u</i> <sub>475</sub> | Si(125)...C(159) | 346.3(16)  | 17.0(tied to <i>u</i> <sub>447</sub> ) | — | -0.2 | 15.2 |
| <i>u</i> <sub>533</sub> | H(26)...H(29)    | 346.4(41)  | 50.8(fixed)                            | — | -2.4 | 50.8 |
| <i>u</i> <sub>483</sub> | H(14)...H(18)    | 346.7(49)  | 49.7(fixed)                            | — | -1.7 | 49.7 |
| <i>u</i> <sub>538</sub> | Si(1)...H(60)    | 346.7(38)  | 30.2(fixed)                            | — | 0.7  | 30.2 |
| <i>u</i> <sub>502</sub> | H(149)...H(152)  | 346.8(40)  | 47.4(fixed)                            | — | -1.4 | 47.4 |
| <i>u</i> <sub>477</sub> | Si(1)...C(35)    | 346.9(16)  | 17.3(tied to <i>u</i> <sub>447</sub> ) | — | -0.3 | 15.6 |
| <i>u</i> <sub>484</sub> | Si(63)...C(101)  | 346.9(15)  | 16.5(tied to <i>u</i> <sub>447</sub> ) | — | -0.2 | 14.8 |
| <i>u</i> <sub>497</sub> | H(145)...H(150)  | 347.2(21)  | 48.4(fixed)                            | — | -2.0 | 48.4 |
| <i>u</i> <sub>413</sub> | H(21)...H(62)    | 347.2(94)  | 67.7(fixed)                            | — | 11.2 | 67.7 |
| <i>u</i> <sub>479</sub> | H(22)...H(24)    | 347.8(21)  | 46.5(fixed)                            | — | -1.5 | 46.5 |
| <i>u</i> <sub>601</sub> | C(55)...C(56)    | 347.8(63)  | 29.9(tied to <i>u</i> <sub>447</sub> ) | — | 0.0  | 26.8 |
| <i>u</i> <sub>456</sub> | Si(128)...C(180) | 348.0(15)  | 18.1(tied to <i>u</i> <sub>447</sub> ) | — | -0.5 | 16.2 |
| <i>u</i> <sub>529</sub> | H(72)...H(80)    | 348.1(34)  | 44.2(fixed)                            | — | -1.5 | 44.2 |
| <i>u</i> <sub>480</sub> | Si(125)...C(171) | 348.3(7)   | 16.4(tied to <i>u</i> <sub>447</sub> ) | — | -0.2 | 14.7 |
| <i>u</i> <sub>511</sub> | H(8)...H(12)     | 348.5(42)  | 49.8(fixed)                            | — | -1.7 | 49.8 |
| <i>u</i> <sub>448</sub> | H(13)...H(62)    | 348.5(85)  | 66.0(fixed)                            | — | 6.1  | 66.0 |
| <i>u</i> <sub>550</sub> | H(133)...H(137)  | 348.7(42)  | 46.6(fixed)                            | — | -2.2 | 46.6 |
| <i>u</i> <sub>435</sub> | C(135)...H(186)  | 348.8(55)  | 49.0(fixed)                            | — | 10.5 | 49.0 |
| <i>u</i> <sub>540</sub> | Si(63)...H(123)  | 349.1(38)  | 29.0(fixed)                            | — | 0.7  | 29.0 |
| <i>u</i> <sub>473</sub> | H(21)...H(26)    | 349.1(21)  | 47.7(fixed)                            | — | -1.6 | 47.7 |
| <i>u</i> <sub>437</sub> | H(21)...C(56)    | 349.3(50)  | 47.1(fixed)                            | — | 10.5 | 47.1 |
| <i>u</i> <sub>432</sub> | H(14)...H(61)    | 349.5(73)  | 63.8(fixed)                            | — | 10.3 | 63.8 |
| <i>u</i> <sub>582</sub> | Si(65)...H(119)  | 350.1(75)  | 41.7(fixed)                            | — | 4.2  | 41.7 |
| <i>u</i> <sub>577</sub> | Si(125)...H(185) | 350.2(38)  | 44.4(fixed)                            | — | 0.9  | 44.4 |
| <i>u</i> <sub>482</sub> | Si(127)...C(180) | 350.3(19)  | 17.6(tied to <i>u</i> <sub>447</sub> ) | — | -0.4 | 15.8 |
| <i>u</i> <sub>530</sub> | Si(125)...C(175) | 350.4(9)   | 16.4(tied to <i>u</i> <sub>447</sub> ) | — | -0.3 | 14.7 |
| <i>u</i> <sub>507</sub> | Si(125)...C(155) | 350.4(16)  | 16.3(tied to <i>u</i> <sub>447</sub> ) | — | -0.2 | 14.6 |
| <i>u</i> <sub>490</sub> | Si(63)...C(97)   | 350.5(15)  | 16.5(tied to <i>u</i> <sub>447</sub> ) | — | -0.2 | 14.8 |
| <i>u</i> <sub>526</sub> | Si(1)...C(31)    | 351.1(16)  | 16.6(tied to <i>u</i> <sub>447</sub> ) | — | -0.3 | 14.9 |
| <i>u</i> <sub>574</sub> | Si(127)...H(182) | 351.1(64)  | 70.0(fixed)                            | — | 8.9  | 70.0 |

|                         |                  |            |                                        |   |      |      |
|-------------------------|------------------|------------|----------------------------------------|---|------|------|
| <i>u</i> <sub>525</sub> | Si(63)...C(113)  | 351.1(9)   | 16.1(tied to <i>u</i> <sub>447</sub> ) | — | -0.3 | 14.4 |
| <i>u</i> <sub>595</sub> | H(9)...H(44)     | 351.2(115) | 81.8(fixed)                            | — | 20.3 | 81.8 |
| <i>u</i> <sub>365</sub> | C(27)...H(54)    | 351.4(82)  | 60.8(fixed)                            | — | 36.4 | 60.8 |
| <i>u</i> <sub>547</sub> | H(10)...H(18)    | 351.8(33)  | 49.7(fixed)                            | — | -2.2 | 49.7 |
| <i>u</i> <sub>509</sub> | Si(1)...C(39)    | 351.9(14)  | 17.4(tied to <i>u</i> <sub>447</sub> ) | — | -0.3 | 15.6 |
| <i>u</i> <sub>431</sub> | C(139)...H(182)  | 351.9(86)  | 76.3(fixed)                            | — | 19.1 | 76.3 |
| <i>u</i> <sub>581</sub> | H(72)...C(117)   | 352.3(121) | 68.0(fixed)                            | — | 10.7 | 68.0 |
| <i>u</i> <sub>527</sub> | H(88)...H(91)    | 352.5(41)  | 47.6(fixed)                            | — | -1.7 | 47.6 |
| <i>u</i> <sub>505</sub> | H(76)...H(80)    | 352.6(50)  | 43.6(fixed)                            | — | -1.6 | 43.6 |
| <i>u</i> <sub>498</sub> | Si(1)...C(43)    | 352.6(15)  | 16.1(tied to <i>u</i> <sub>447</sub> ) | — | -0.2 | 14.5 |
| <i>u</i> <sub>622</sub> | C(151)...H(181)  | 353.0(59)  | 60.6(fixed)                            | — | 14.3 | 60.6 |
| <i>u</i> <sub>461</sub> | Si(65)...H(124)  | 353.3(34)  | 28.6(fixed)                            | — | 0.8  | 28.6 |
| <i>u</i> <sub>512</sub> | H(84)...H(86)    | 353.4(21)  | 47.3(fixed)                            | — | -2.1 | 47.3 |
| <i>u</i> <sub>510</sub> | H(9)...H(13)     | 353.5(41)  | 49.4(fixed)                            | — | -1.6 | 49.4 |
| <i>u</i> <sub>566</sub> | Si(125)...H(184) | 353.9(37)  | 30.9(fixed)                            | — | 2.4  | 30.9 |
| <i>u</i> <sub>536</sub> | H(70)...H(92)    | 353.9(134) | 84.5(fixed)                            | — | 18.0 | 84.5 |
| <i>u</i> <sub>532</sub> | Si(1)...C(51)    | 354.6(9)   | 16.8(tied to <i>u</i> <sub>447</sub> ) | — | -0.2 | 15.1 |
| <i>u</i> <sub>436</sub> | H(75)...C(85)    | 354.7(114) | 49.8(fixed)                            | — | 15.6 | 49.8 |
| <i>u</i> <sub>674</sub> | C(117)...H(123)  | 354.7(86)  | 41.1(fixed)                            | — | 3.1  | 41.1 |
| <i>u</i> <sub>453</sub> | H(145)...H(186)  | 354.8(92)  | 70.1(fixed)                            | — | 7.7  | 70.1 |
| <i>u</i> <sub>539</sub> | Si(128)...H(168) | 354.8(82)  | 39.2(fixed)                            | — | 12.9 | 39.2 |
| <i>u</i> <sub>513</sub> | Si(125)...C(167) | 354.8(15)  | 16.1(tied to <i>u</i> <sub>447</sub> ) | — | -0.2 | 14.4 |
| <i>u</i> <sub>537</sub> | Si(63)...C(93)   | 355.1(16)  | 15.7(tied to <i>u</i> <sub>447</sub> ) | — | -0.2 | 14.1 |
| <i>u</i> <sub>486</sub> | C(11)...H(24)    | 355.6(100) | 63.1(fixed)                            | — | 16.3 | 63.1 |
| <i>u</i> <sub>515</sub> | H(9)...H(17)     | 355.8(33)  | 48.3(fixed)                            | — | -1.2 | 48.3 |
| <i>u</i> <sub>516</sub> | Si(63)...C(105)  | 355.9(15)  | 17.4(tied to <i>u</i> <sub>447</sub> ) | — | -0.4 | 15.6 |
| <i>u</i> <sub>561</sub> | Si(1)...H(48)    | 356.0(11)  | 33.4(fixed)                            | — | 1.8  | 33.4 |
| <i>u</i> <sub>373</sub> | H(137)...H(186)  | 356.1(84)  | 69.6(fixed)                            | — | 14.7 | 69.6 |
| <i>u</i> <sub>597</sub> | Si(63)...H(122)  | 356.5(37)  | 28.5(fixed)                            | — | 0.1  | 28.5 |
| <i>u</i> <sub>492</sub> | Si(3)...H(62)    | 356.6(34)  | 32.1(fixed)                            | — | 0.6  | 32.1 |
| <i>u</i> <sub>534</sub> | Si(65)...H(123)  | 356.6(30)  | 28.4(fixed)                            | — | 0.2  | 28.4 |
| <i>u</i> <sub>524</sub> | Si(127)...H(149) | 356.7(60)  | 44.3(fixed)                            | — | 7.8  | 44.3 |
| <i>u</i> <sub>504</sub> | Si(4)...H(62)    | 357.0(28)  | 30.5(fixed)                            | — | 1.0  | 30.5 |
| <i>u</i> <sub>546</sub> | H(70)...H(74)    | 357.1(41)  | 43.3(fixed)                            | — | -2.1 | 43.3 |
| <i>u</i> <sub>455</sub> | H(145)...C(180)  | 357.3(49)  | 47.3(fixed)                            | — | 7.1  | 47.3 |
| <i>u</i> <sub>499</sub> | Si(3)...H(61)    | 357.3(30)  | 31.3(fixed)                            | — | 0.6  | 31.3 |
| <i>u</i> <sub>569</sub> | Si(125)...H(161) | 357.5(30)  | 30.3(fixed)                            | — | 1.1  | 30.3 |
| <i>u</i> <sub>449</sub> | C(131)...H(149)  | 357.8(133) | 56.6(fixed)                            | — | 12.1 | 56.6 |
| <i>u</i> <sub>495</sub> | H(132)...H(136)  | 357.8(41)  | 45.6(fixed)                            | — | -0.9 | 45.6 |
| <i>u</i> <sub>521</sub> | Si(66)...H(124)  | 357.8(28)  | 30.0(fixed)                            | — | 0.1  | 30.0 |
| <i>u</i> <sub>438</sub> | C(77)...H(120)   | 357.9(108) | 49.0(fixed)                            | — | 10.1 | 49.0 |
| <i>u</i> <sub>558</sub> | Si(63)...H(110)  | 358.1(11)  | 29.7(fixed)                            | — | 1.8  | 29.7 |
| <i>u</i> <sub>336</sub> | H(82)...C(113)   | 358.2(143) | 58.4(fixed)                            | — | 20.0 | 58.4 |
| <i>u</i> <sub>576</sub> | H(14)...H(24)    | 358.3(104) | 79.5(fixed)                            | — | 18.5 | 79.5 |
| <i>u</i> <sub>457</sub> | C(19)...H(60)    | 358.3(50)  | 46.2(fixed)                            | — | 8.7  | 46.2 |
| <i>u</i> <sub>443</sub> | H(132)...C(147)  | 358.4(130) | 55.3(fixed)                            | — | 11.7 | 55.3 |

|                         |                  |            |                                        |   |      |      |
|-------------------------|------------------|------------|----------------------------------------|---|------|------|
| <i>u</i> <sub>514</sub> | H(71)...H(79)    | 358.5(32)  | 44.7(fixed)                            | — | -1.3 | 44.7 |
| <i>u</i> <sub>575</sub> | Si(63)...H(111)  | 358.7(11)  | 33.4(fixed)                            | — | 1.2  | 33.4 |
| <i>u</i> <sub>602</sub> | C(135)...H(148)  | 358.8(103) | 60.5(fixed)                            | — | 5.0  | 60.5 |
| <i>u</i> <sub>508</sub> | H(138)...H(142)  | 358.9(46)  | 44.3(fixed)                            | — | -1.9 | 44.3 |
| <i>u</i> <sub>545</sub> | H(22)...H(30)    | 359.1(30)  | 45.9(fixed)                            | — | -2.0 | 45.9 |
| <i>u</i> <sub>506</sub> | Si(128)...H(132) | 359.4(73)  | 40.8(fixed)                            | — | 9.0  | 40.8 |
| <i>u</i> <sub>552</sub> | Si(125)...C(163) | 359.7(14)  | 15.7(tied to <i>u</i> <sub>447</sub> ) | — | -0.3 | 14.1 |
| <i>u</i> <sub>543</sub> | H(82)...H(90)    | 359.7(29)  | 44.3(fixed)                            | — | -1.7 | 44.3 |
| <i>u</i> <sub>589</sub> | H(76)...H(86)    | 359.8(135) | 82.1(fixed)                            | — | 13.3 | 82.1 |
| <i>u</i> <sub>481</sub> | Si(128)...H(186) | 359.9(28)  | 38.3(fixed)                            | — | 1.8  | 38.3 |
| <i>u</i> <sub>501</sub> | Si(66)...H(122)  | 360.3(26)  | 28.8(fixed)                            | — | 0.6  | 28.8 |
| <i>u</i> <sub>591</sub> | Si(63)...H(104)  | 360.6(22)  | 30.6(fixed)                            | — | 0.6  | 30.6 |
| <i>u</i> <sub>555</sub> | Si(63)...H(99)   | 360.8(29)  | 30.0(fixed)                            | — | 1.2  | 30.0 |
| <i>u</i> <sub>572</sub> | H(140)...H(185)  | 361.1(59)  | 61.5(fixed)                            | — | 17.5 | 61.5 |
| <i>u</i> <sub>686</sub> | H(154)...C(179)  | 361.4(55)  | 61.8(fixed)                            | — | 7.3  | 61.8 |
| <i>u</i> <sub>559</sub> | Si(125)...H(172) | 361.5(11)  | 32.7(fixed)                            | — | 1.7  | 32.7 |
| <i>u</i> <sub>441</sub> | H(141)...C(179)  | 361.9(86)  | 62.6(fixed)                            | — | 12.7 | 62.6 |
| <i>u</i> <sub>763</sub> | H(144)...H(169)  | 361.9(275) | 54.5(fixed)                            | — | 6.0  | 54.5 |
| <i>u</i> <sub>557</sub> | Si(1)...H(37)    | 361.9(30)  | 32.9(fixed)                            | — | 1.6  | 32.9 |
| <i>u</i> <sub>593</sub> | Si(63)...H(115)  | 362.1(22)  | 29.8(fixed)                            | — | 1.4  | 29.8 |
| <i>u</i> <sub>742</sub> | H(138)...H(148)  | 362.5(106) | 77.8(fixed)                            | — | 3.9  | 77.8 |
| <i>u</i> <sub>554</sub> | Si(4)...H(60)    | 362.5(27)  | 29.9(fixed)                            | — | 0.5  | 29.9 |
| <i>u</i> <sub>562</sub> | Si(1)...H(45)    | 362.8(22)  | 29.3(fixed)                            | — | 1.4  | 29.3 |
| <i>u</i> <sub>584</sub> | Si(1)...H(36)    | 363.6(30)  | 31.8(fixed)                            | — | 1.3  | 31.8 |
| <i>u</i> <sub>609</sub> | Si(125)...H(178) | 363.6(23)  | 29.7(fixed)                            | — | 1.2  | 29.7 |
| <i>u</i> <sub>556</sub> | Si(63)...H(103)  | 364.6(22)  | 28.6(fixed)                            | — | 1.6  | 28.6 |
| <i>u</i> <sub>560</sub> | Si(127)...H(186) | 365.3(34)  | 32.7(fixed)                            | — | 2.1  | 32.7 |
| <i>u</i> <sub>563</sub> | Si(125)...H(160) | 365.5(30)  | 31.8(fixed)                            | — | 1.3  | 31.8 |
| <i>u</i> <sub>503</sub> | C(143)...H(184)  | 365.8(50)  | 49.4(fixed)                            | — | 7.1  | 49.4 |
| <i>u</i> <sub>636</sub> | C(77)...C(118)   | 365.8(32)  | 38.3(tied to <i>u</i> <sub>447</sub> ) | — | 0.8  | 34.3 |
| <i>u</i> <sub>528</sub> | H(144)...H(176)  | 365.9(146) | 57.9(fixed)                            | — | 13.9 | 57.9 |
| <i>u</i> <sub>549</sub> | Si(128)...H(184) | 366.0(26)  | 35.2(fixed)                            | — | 1.1  | 35.2 |
| <i>u</i> <sub>590</sub> | Si(125)...H(157) | 366.2(29)  | 32.9(fixed)                            | — | 1.1  | 32.9 |
| <i>u</i> <sub>732</sub> | H(132)...H(154)  | 366.2(150) | 56.5(fixed)                            | — | 2.9  | 56.5 |
| <i>u</i> <sub>604</sub> | Si(1)...H(49)    | 366.2(11)  | 30.0(fixed)                            | — | 1.1  | 30.0 |
| <i>u</i> <sub>613</sub> | Si(1)...H(33)    | 366.4(29)  | 31.7(fixed)                            | — | 1.3  | 31.7 |
| <i>u</i> <sub>567</sub> | Si(125)...H(169) | 366.6(22)  | 32.2(fixed)                            | — | 1.3  | 32.2 |
| <i>u</i> <sub>407</sub> | C(15)...H(44)    | 366.8(88)  | 55.8(fixed)                            | — | 22.8 | 55.8 |
| <i>u</i> <sub>588</sub> | Si(125)...H(173) | 366.9(11)  | 31.5(fixed)                            | — | 1.3  | 31.5 |
| <i>u</i> <sub>611</sub> | Si(1)...H(42)    | 367.0(21)  | 28.7(fixed)                            | — | 1.4  | 28.7 |
| <i>u</i> <sub>568</sub> | H(146)...H(154)  | 367.0(29)  | 45.7(fixed)                            | — | -2.4 | 45.7 |
| <i>u</i> <sub>631</sub> | H(24)...C(56)    | 367.3(67)  | 57.7(fixed)                            | — | 7.3  | 57.7 |
| <i>u</i> <sub>594</sub> | Si(125)...H(158) | 367.3(29)  | 28.6(fixed)                            | — | 1.6  | 28.6 |
| <i>u</i> <sub>573</sub> | Si(127)...H(185) | 367.4(29)  | 35.8(fixed)                            | — | 1.6  | 35.8 |
| <i>u</i> <sub>585</sub> | C(139)...C(163)  | 367.8(150) | 38.0(tied to <i>u</i> <sub>447</sub> ) | — | 13.9 | 34.1 |
| <i>u</i> <sub>608</sub> | H(16)...C(55)    | 367.9(88)  | 65.9(fixed)                            | — | 5.9  | 65.9 |

|                         |                   |            |                                        |   |      |       |
|-------------------------|-------------------|------------|----------------------------------------|---|------|-------|
| <i>u</i> <sub>586</sub> | Si(3)...H(25)     | 368.1(52)  | 46.7(fixed)                            | — | 13.2 | 46.7  |
| <i>u</i> <sub>750</sub> | H(14)...H(25)     | 368.2(107) | 74.3(fixed)                            | — | 5.4  | 74.3  |
| <i>u</i> <sub>647</sub> | Si(65)...H(91)    | 368.5(69)  | 47.5(fixed)                            | — | 8.9  | 47.5  |
| <i>u</i> <sub>668</sub> | C(55)...H(60)     | 368.9(68)  | 44.7(fixed)                            | — | -0.9 | 44.7  |
| <i>u</i> <sub>620</sub> | C(23)...H(62)     | 369.4(72)  | 53.5(fixed)                            | — | 5.9  | 53.5  |
| <i>u</i> <sub>603</sub> | Si(1)...H(34)     | 369.6(29)  | 31.4(fixed)                            | — | 1.4  | 31.4  |
| <i>u</i> <sub>605</sub> | Si(125)...H(177)  | 370.1(23)  | 31.5(fixed)                            | — | 1.0  | 31.5  |
| <i>u</i> <sub>649</sub> | H(16)...H(58)     | 370.2(92)  | 79.2(fixed)                            | — | 7.4  | 79.2  |
| <i>u</i> <sub>661</sub> | C(77)...H(124)    | 370.3(54)  | 51.3(fixed)                            | — | -0.6 | 51.3  |
| <i>u</i> <sub>762</sub> | H(138)...H(149)   | 370.5(102) | 60.5(fixed)                            | — | 0.0  | 60.5  |
| <i>u</i> <sub>600</sub> | C(15)...H(61)     | 370.9(50)  | 48.2(fixed)                            | — | 4.5  | 48.2  |
| <i>u</i> <sub>677</sub> | C(15)...H(45)     | 370.9(114) | 82.2(fixed)                            | — | 8.4  | 82.2  |
| <i>u</i> <sub>583</sub> | Si(1)...H(41)     | 371.2(21)  | 35.1(fixed)                            | — | 1.2  | 35.1  |
| <i>u</i> <sub>614</sub> | Si(1)...H(53)     | 371.2(22)  | 34.0(fixed)                            | — | 1.5  | 34.0  |
| <i>u</i> <sub>599</sub> | H(134)...C(151)   | 371.3(116) | 61.5(fixed)                            | — | 6.3  | 61.5  |
| <i>u</i> <sub>782</sub> | H(79)...C(118)    | 371.4(50)  | 56.4(fixed)                            | — | -2.0 | 56.4  |
| <i>u</i> <sub>646</sub> | C(69)...C(105)    | 372.3(116) | 44.4(tied to <i>u</i> <sub>655</sub> ) | — | 15.7 | 41.9  |
| <i>u</i> <sub>627</sub> | Si(63)...H(95)    | 372.9(28)  | 29.6(fixed)                            | — | 0.7  | 29.6  |
| <i>u</i> <sub>619</sub> | Si(63)...H(96)    | 373.0(28)  | 27.4(fixed)                            | — | 1.1  | 27.4  |
| <i>u</i> <sub>523</sub> | H(70)...C(89)     | 373.0(101) | 65.2(fixed)                            | — | 17.7 | 65.2  |
| <i>u</i> <sub>760</sub> | H(17)...H(58)     | 373.4(87)  | 62.4(fixed)                            | — | 1.7  | 62.4  |
| <i>u</i> <sub>618</sub> | Si(1)...H(54)     | 373.4(23)  | 32.5(fixed)                            | — | 1.7  | 32.5  |
| <i>u</i> <sub>610</sub> | Si(63)...H(98)    | 373.5(29)  | 27.8(fixed)                            | — | 0.4  | 27.8  |
| <i>u</i> <sub>592</sub> | Si(63)...H(107)   | 373.7(21)  | 33.6(fixed)                            | — | 0.6  | 33.6  |
| <i>u</i> <sub>628</sub> | Si(66)...H(75)    | 373.8(61)  | 40.0(fixed)                            | — | 9.2  | 40.0  |
| <i>u</i> <sub>596</sub> | Si(63)...H(106)   | 374.1(21)  | 29.4(fixed)                            | — | 1.1  | 29.4  |
| <i>u</i> <sub>518</sub> | H(20)...H(60)     | 374.3(87)  | 65.8(fixed)                            | — | 8.9  | 65.8  |
| <i>u</i> <sub>623</sub> | Si(63)...H(116)   | 374.4(23)  | 29.6(fixed)                            | — | 0.9  | 29.6  |
| <i>u</i> <sub>678</sub> | H(134)...H(154)   | 374.5(147) | 74.7(fixed)                            | — | 6.8  | 74.7  |
| <i>u</i> <sub>626</sub> | C(85)...C(118)    | 375.0(43)  | 33.0(tied to <i>u</i> <sub>655</sub> ) | — | 0.8  | 31.2  |
| <i>u</i> <sub>570</sub> | C(69)...H(91)     | 375.5(96)  | 63.7(fixed)                            | — | 14.9 | 63.7  |
| <i>u</i> <sub>630</sub> | Si(125)...H(166)  | 375.8(21)  | 27.4(fixed)                            | — | 0.8  | 27.4  |
| <i>u</i> <sub>522</sub> | H(78)...H(120)    | 376.0(111) | 74.6(fixed)                            | — | 8.0  | 74.6  |
| <i>u</i> <sub>616</sub> | H(16)...C(56)     | 376.4(43)  | 51.6(fixed)                            | — | 6.7  | 51.6  |
| <i>u</i> <sub>383</sub> | C(81)...H(116)    | 376.8(151) | 52.4(fixed)                            | — | 21.1 | 52.4  |
| <i>u</i> <sub>617</sub> | Si(1)...H(44)     | 377.1(21)  | 28.6(fixed)                            | — | 0.6  | 28.6  |
| <i>u</i> <sub>587</sub> | Si(3)...H(44)     | 377.5(59)  | 53.3(fixed)                            | — | 18.6 | 53.3  |
| <i>u</i> <sub>571</sub> | H(148)...C(180)   | 377.8(63)  | 45.8(fixed)                            | — | 6.8  | 45.8  |
| <i>u</i> <sub>639</sub> | Si(127)...Si(128) | 377.9(30)  | 15.1(tied to <i>u</i> <sub>655</sub> ) | — | -0.2 | 14.2  |
| <i>u</i> <sub>803</sub> | H(10)...H(45)     | 378.0(167) | 63.3(fixed)                            | — | 8.4  | 63.3  |
| <i>u</i> <sub>462</sub> | H(8)...H(54)      | 378.0(156) | 107.4(fixed)                           | — | 24.3 | 107.4 |
| <i>u</i> <sub>736</sub> | C(131)...H(181)   | 378.4(81)  | 70.1(fixed)                            | — | 5.8  | 70.1  |
| <i>u</i> <sub>629</sub> | Si(125)...H(168)  | 378.7(21)  | 25.9(fixed)                            | — | 0.8  | 25.9  |
| <i>u</i> <sub>541</sub> | C(147)...H(186)   | 379.4(69)  | 48.2(fixed)                            | — | 8.4  | 48.2  |
| <i>u</i> <sub>665</sub> | C(135)...C(147)   | 379.5(71)  | 39.4(tied to <i>u</i> <sub>655</sub> ) | — | 2.9  | 37.1  |
| <i>u</i> <sub>565</sub> | C(7)...H(25)      | 380.6(124) | 68.1(fixed)                            | — | 18.2 | 68.1  |

|                          |                  |            |                                        |   |      |      |
|--------------------------|------------------|------------|----------------------------------------|---|------|------|
| <i>u</i> <sub>621</sub>  | C(11)...C(56)    | 381.1(39)  | 37.3(tied to <i>u</i> <sub>447</sub> ) | — | -0.1 | 33.4 |
| <i>u</i> <sub>638</sub>  | Si(125)...H(165) | 381.1(20)  | 28.2(fixed)                            | — | 0.5  | 28.2 |
| <i>u</i> <sub>466</sub>  | H(10)...C(51)    | 381.6(117) | 78.1(fixed)                            | — | 19.7 | 78.1 |
| <i>u</i> <sub>641</sub>  | Si(4)...H(8)     | 381.7(70)  | 50.8(fixed)                            | — | 8.3  | 50.8 |
| <i>u</i> <sub>644</sub>  | C(11)...C(23)    | 382.1(66)  | 37.9(tied to <i>u</i> <sub>655</sub> ) | — | 10.7 | 35.7 |
| <i>u</i> <sub>684</sub>  | Si(3)...H(57)    | 382.4(66)  | 38.5(fixed)                            | — | 5.2  | 38.5 |
| <i>u</i> <sub>612</sub>  | H(144)...H(184)  | 384.1(85)  | 58.8(fixed)                            | — | 8.3  | 58.8 |
| <i>u</i> <sub>643</sub>  | Si(1)...H(17)    | 384.1(49)  | 39.2(fixed)                            | — | 8.4  | 39.2 |
| <i>u</i> <sub>624</sub>  | C(135)...C(180)  | 384.2(38)  | 34.6(tied to <i>u</i> <sub>655</sub> ) | — | 1.0  | 32.6 |
| <i>u</i> <sub>655</sub>  | Si(3)...Si(4)    | 384.3(27)  | 17.6(8)                                | — | -0.3 | 16.6 |
| <i>u</i> <sub>580</sub>  | H(8)...C(23)     | 384.4(125) | 66.0(fixed)                            | — | 14.3 | 66.0 |
| <i>u</i> <sub>807</sub>  | C(143)...C(167)  | 384.5(190) | 47.7(tied to <i>u</i> <sub>874</sub> ) | — | 3.2  | 43.7 |
| <i>u</i> <sub>662</sub>  | C(131)...C(151)  | 384.5(103) | 35.8(tied to <i>u</i> <sub>655</sub> ) | — | 4.4  | 33.8 |
| <i>u</i> <sub>799</sub>  | H(71)...H(107)   | 384.6(110) | 65.2(fixed)                            | — | 16.9 | 65.2 |
| <i>u</i> <sub>520</sub>  | C(73)...H(124)   | 385.2(61)  | 46.9(fixed)                            | — | 5.5  | 46.9 |
| <i>u</i> <sub>553</sub>  | H(76)...C(118)   | 385.2(55)  | 49.3(fixed)                            | — | 6.6  | 49.3 |
| <i>u</i> <sub>687</sub>  | C(15)...C(55)    | 385.5(69)  | 39.6(tied to <i>u</i> <sub>655</sub> ) | — | 2.9  | 37.3 |
| <i>u</i> <sub>1023</sub> | H(76)...H(91)    | 385.6(151) | 80.6(fixed)                            | — | 1.8  | 80.6 |
| <i>u</i> <sub>652</sub>  | H(10)...H(46)    | 386.2(121) | 64.6(fixed)                            | — | 18.4 | 64.6 |
| <i>u</i> <sub>632</sub>  | Si(4)...H(33)    | 386.3(69)  | 57.5(fixed)                            | — | 16.2 | 57.5 |
| <i>u</i> <sub>663</sub>  | Si(65)...Si(66)  | 386.6(27)  | 15.8(tied to <i>u</i> <sub>655</sub> ) | — | -0.2 | 14.9 |
| <i>u</i> <sub>722</sub>  | H(87)...C(118)   | 388.2(72)  | 59.0(fixed)                            | — | -1.5 | 59.0 |
| <i>u</i> <sub>694</sub>  | Si(63)...H(72)   | 388.4(51)  | 46.5(fixed)                            | — | 8.4  | 46.5 |
| <i>u</i> <sub>675</sub>  | H(136)...H(149)  | 388.5(84)  | 59.8(fixed)                            | — | 7.5  | 59.8 |
| <i>u</i> <sub>983</sub>  | H(8)...H(30)     | 388.9(148) | 89.1(fixed)                            | — | 0.4  | 89.1 |
| <i>u</i> <sub>759</sub>  | H(18)...H(57)    | 389.2(84)  | 49.4(fixed)                            | — | 5.8  | 49.4 |
| <i>u</i> <sub>454</sub>  | C(7)...H(54)     | 389.4(149) | 85.9(fixed)                            | — | 21.4 | 85.9 |
| <i>u</i> <sub>650</sub>  | C(73)...C(85)    | 389.4(87)  | 37.4(tied to <i>u</i> <sub>655</sub> ) | — | 8.3  | 35.3 |
| <i>u</i> <sub>713</sub>  | H(137)...H(150)  | 389.6(86)  | 52.2(fixed)                            | — | 10.6 | 52.2 |
| <i>u</i> <sub>685</sub>  | H(132)...H(152)  | 389.9(120) | 53.8(fixed)                            | — | 8.7  | 53.8 |
| <i>u</i> <sub>615</sub>  | C(81)...H(122)   | 390.1(63)  | 49.8(fixed)                            | — | 3.6  | 49.8 |
| <i>u</i> <sub>689</sub>  | H(145)...C(175)  | 390.2(68)  | 66.2(fixed)                            | — | 6.1  | 66.2 |
| <i>u</i> <sub>697</sub>  | H(13)...C(15)    | 390.8(21)  | 14.1(fixed)                            | — | -5.1 | 14.1 |
| <i>u</i> <sub>698</sub>  | C(11)...H(17)    | 390.9(21)  | 14.2(fixed)                            | — | -4.8 | 14.2 |
| <i>u</i> <sub>637</sub>  | C(19)...C(56)    | 391.1(42)  | 35.5(tied to <i>u</i> <sub>655</sub> ) | — | 1.9  | 33.5 |
| <i>u</i> <sub>645</sub>  | C(77)...C(117)   | 391.5(80)  | 37.4(tied to <i>u</i> <sub>655</sub> ) | — | 5.2  | 35.3 |
| <i>u</i> <sub>673</sub>  | Si(63)...Si(65)  | 391.8(19)  | 15.5(tied to <i>u</i> <sub>655</sub> ) | — | -0.1 | 14.7 |
| <i>u</i> <sub>812</sub>  | H(8)...H(44)     | 391.9(149) | 59.5(fixed)                            | — | 9.4  | 59.5 |
| <i>u</i> <sub>786</sub>  | H(17)...H(61)    | 392.0(69)  | 58.1(fixed)                            | — | 1.9  | 58.1 |
| <i>u</i> <sub>467</sub>  | C(89)...H(116)   | 392.0(243) | 65.9(fixed)                            | — | 16.1 | 65.9 |
| <i>u</i> <sub>710</sub>  | C(23)...H(30)    | 392.3(17)  | 14.6(fixed)                            | — | -5.5 | 14.6 |
| <i>u</i> <sub>634</sub>  | H(83)...C(118)   | 392.3(62)  | 54.3(fixed)                            | — | 4.7  | 54.3 |
| <i>u</i> <sub>671</sub>  | H(13)...H(26)    | 392.4(81)  | 51.2(fixed)                            | — | 20.7 | 51.2 |
| <i>u</i> <sub>659</sub>  | C(85)...H(122)   | 392.4(73)  | 45.4(fixed)                            | — | -0.2 | 45.4 |
| <i>u</i> <sub>701</sub>  | H(137)...C(139)  | 392.5(20)  | 14.0(fixed)                            | — | -4.6 | 14.0 |
| <i>u</i> <sub>712</sub>  | H(24)...C(27)    | 392.5(17)  | 14.3(fixed)                            | — | -5.2 | 14.3 |

|                         |                   |            |                                        |   |      |      |
|-------------------------|-------------------|------------|----------------------------------------|---|------|------|
| <i>u</i> <sub>708</sub> | C(73)...H(79)     | 392.6(21)  | 14.0(fixed)                            | — | -4.4 | 14.0 |
| <i>u</i> <sub>702</sub> | H(75)...C(77)     | 392.8(21)  | 13.8(fixed)                            | — | -4.0 | 13.8 |
| <i>u</i> <sub>696</sub> | H(132)...C(139)   | 393.0(8)   | 14.2(fixed)                            | — | -4.8 | 14.2 |
| <i>u</i> <sub>718</sub> | H(148)...C(151)   | 393.2(17)  | 14.2(fixed)                            | — | -5.1 | 14.2 |
| <i>u</i> <sub>884</sub> | H(58)...H(62)     | 393.2(93)  | 43.3(fixed)                            | — | -0.2 | 43.3 |
| <i>u</i> <sub>720</sub> | C(147)...H(154)   | 393.7(18)  | 14.0(fixed)                            | — | -4.6 | 14.0 |
| <i>u</i> <sub>703</sub> | C(135)...H(141)   | 393.7(20)  | 13.8(fixed)                            | — | -4.0 | 13.8 |
| <i>u</i> <sub>691</sub> | C(143)...H(149)   | 393.8(9)   | 14.2(fixed)                            | — | -5.1 | 14.2 |
| <i>u</i> <sub>693</sub> | C(131)...H(140)   | 393.9(8)   | 13.8(fixed)                            | — | -3.9 | 13.8 |
| <i>u</i> <sub>704</sub> | H(133)...H(153)   | 394.1(127) | 47.2(fixed)                            | — | 12.1 | 47.2 |
| <i>u</i> <sub>717</sub> | H(86)...C(89)     | 394.1(17)  | 14.1(fixed)                            | — | -4.9 | 14.1 |
| <i>u</i> <sub>721</sub> | C(85)...H(92)     | 394.2(17)  | 14.2(fixed)                            | — | -4.7 | 14.2 |
| <i>u</i> <sub>642</sub> | Si(125)...H(141)  | 394.2(47)  | 41.8(fixed)                            | — | 7.5  | 41.8 |
| <i>u</i> <sub>805</sub> | H(17)...H(59)     | 394.3(87)  | 56.6(fixed)                            | — | 7.2  | 56.6 |
| <i>u</i> <sub>699</sub> | C(81)...H(87)     | 394.6(9)   | 14.1(fixed)                            | — | -5.0 | 14.1 |
| <i>u</i> <sub>692</sub> | H(144)...C(147)   | 394.6(9)   | 13.9(fixed)                            | — | -4.2 | 13.9 |
| <i>u</i> <sub>681</sub> | Si(1)...Si(3)     | 394.7(18)  | 15.4(tied to <i>u</i> <sub>655</sub> ) | — | -0.2 | 14.6 |
| <i>u</i> <sub>707</sub> | Si(4)...H(13)     | 394.8(59)  | 38.3(fixed)                            | — | 8.6  | 38.3 |
| <i>u</i> <sub>690</sub> | C(19)...H(25)     | 395.0(9)   | 14.4(fixed)                            | — | -5.1 | 14.4 |
| <i>u</i> <sub>625</sub> | H(140)...H(164)   | 395.0(163) | 46.1(fixed)                            | — | 21.3 | 46.1 |
| <i>u</i> <sub>865</sub> | H(70)...H(108)    | 395.0(115) | 74.8(fixed)                            | — | 16.8 | 74.8 |
| <i>u</i> <sub>771</sub> | H(12)...H(25)     | 395.0(80)  | 63.7(fixed)                            | — | 16.3 | 63.7 |
| <i>u</i> <sub>700</sub> | H(82)...C(85)     | 395.4(9)   | 13.9(fixed)                            | — | -4.4 | 13.9 |
| <i>u</i> <sub>676</sub> | Si(125)...Si(127) | 395.6(18)  | 17.9(tied to <i>u</i> <sub>655</sub> ) | — | -0.3 | 16.9 |
| <i>u</i> <sub>695</sub> | H(20)...C(23)     | 395.7(9)   | 14.1(fixed)                            | — | -4.3 | 14.1 |
| <i>u</i> <sub>927</sub> | H(141)...H(164)   | 396.0(191) | 68.5(fixed)                            | — | 6.3  | 68.5 |
| <i>u</i> <sub>740</sub> | Si(128)...H(137)  | 396.0(61)  | 40.9(fixed)                            | — | 7.2  | 40.9 |
| <i>u</i> <sub>727</sub> | C(19)...H(29)     | 396.3(5)   | 14.5(fixed)                            | — | -5.5 | 14.5 |
| <i>u</i> <sub>598</sub> | H(18)...H(44)     | 396.3(87)  | 68.2(fixed)                            | — | 22.1 | 68.2 |
| <i>u</i> <sub>752</sub> | H(16)...H(62)     | 396.3(67)  | 60.2(fixed)                            | — | 4.7  | 60.2 |
| <i>u</i> <sub>711</sub> | H(72)...C(73)     | 396.4(8)   | 14.0(fixed)                            | — | -4.4 | 14.0 |
| <i>u</i> <sub>753</sub> | Si(125)...H(154)  | 396.4(56)  | 45.2(fixed)                            | — | 6.3  | 45.2 |
| <i>u</i> <sub>714</sub> | C(69)...H(76)     | 396.8(8)   | 13.7(fixed)                            | — | -4.0 | 13.7 |
| <i>u</i> <sub>996</sub> | H(119)...H(123)   | 396.9(98)  | 47.1(fixed)                            | — | 0.2  | 47.1 |
| <i>u</i> <sub>725</sub> | H(10)...C(11)     | 397.1(8)   | 14.4(fixed)                            | — | -5.2 | 14.4 |
| <i>u</i> <sub>716</sub> | C(7)...H(14)      | 397.1(8)   | 14.3(fixed)                            | — | -5.2 | 14.3 |
| <i>u</i> <sub>719</sub> | H(83)...C(89)     | 397.4(5)   | 14.2(fixed)                            | — | -4.6 | 14.2 |
| <i>u</i> <sub>726</sub> | C(81)...H(91)     | 397.4(5)   | 14.1(fixed)                            | — | -4.8 | 14.1 |
| <i>u</i> <sub>724</sub> | H(21)...C(27)     | 397.5(5)   | 13.9(fixed)                            | — | -4.3 | 13.9 |
| <i>u</i> <sub>749</sub> | Si(127)...H(153)  | 397.6(81)  | 38.8(fixed)                            | — | 7.0  | 38.8 |
| <i>u</i> <sub>653</sub> | C(143)...C(180)   | 397.7(41)  | 32.3(tied to <i>u</i> <sub>655</sub> ) | — | -0.3 | 30.5 |
| <i>u</i> <sub>914</sub> | C(117)...C(118)   | 397.8(67)  | 29.7(tied to <i>u</i> <sub>874</sub> ) | — | -1.0 | 27.2 |
| <i>u</i> <sub>731</sub> | C(143)...H(153)   | 398.0(6)   | 14.2(fixed)                            | — | -4.7 | 14.2 |
| <i>u</i> <sub>745</sub> | Si(125)...Si(128) | 398.0(9)   | 16.1(tied to <i>u</i> <sub>655</sub> ) | — | -0.3 | 15.2 |
| <i>u</i> <sub>723</sub> | C(69)...H(78)     | 398.0(8)   | 13.9(fixed)                            | — | -4.3 | 13.9 |
| <i>u</i> <sub>737</sub> | H(8)...C(15)      | 398.1(8)   | 14.5(fixed)                            | — | -5.3 | 14.5 |

|                          |                  |            |                                        |   |      |       |
|--------------------------|------------------|------------|----------------------------------------|---|------|-------|
| <i>u</i> <sub>741</sub>  | H(134)...C(135)  | 398.1(8)   | 14.3(fixed)                            | — | -4.9 | 14.3  |
| <i>u</i> <sub>739</sub>  | C(7)...H(16)     | 398.1(8)   | 14.4(fixed)                            | — | -5.2 | 14.4  |
| <i>u</i> <sub>755</sub>  | Si(65)...C(117)  | 398.2(62)  | 27.7(tied to <i>u</i> <sub>655</sub> ) | — | 0.6  | 26.2  |
| <i>u</i> <sub>730</sub>  | H(70)...C(77)    | 398.4(8)   | 13.9(fixed)                            | — | -4.2 | 13.9  |
| <i>u</i> <sub>728</sub>  | C(131)...H(138)  | 398.4(8)   | 14.1(fixed)                            | — | -4.6 | 14.1  |
| <i>u</i> <sub>815</sub>  | H(24)...H(60)    | 398.5(101) | 71.9(fixed)                            | — | 2.6  | 71.9  |
| <i>u</i> <sub>680</sub>  | Si(65)...H(87)   | 398.6(68)  | 39.6(fixed)                            | — | 10.1 | 39.6  |
| <i>u</i> <sub>735</sub>  | H(145)...C(151)  | 398.8(5)   | 14.0(fixed)                            | — | -4.6 | 14.0  |
| <i>u</i> <sub>651</sub>  | C(135)...H(185)  | 399.3(57)  | 59.6(fixed)                            | — | 0.3  | 59.6  |
| <i>u</i> <sub>667</sub>  | C(11)...H(61)    | 399.4(58)  | 49.5(fixed)                            | — | -1.1 | 49.5  |
| <i>u</i> <sub>794</sub>  | H(78)...H(119)   | 399.5(114) | 65.7(fixed)                            | — | -2.7 | 65.7  |
| <i>u</i> <sub>883</sub>  | H(70)...H(119)   | 399.8(138) | 81.0(fixed)                            | — | 0.6  | 81.0  |
| <i>u</i> <sub>989</sub>  | H(79)...H(124)   | 400.1(69)  | 65.7(fixed)                            | — | -6.7 | 65.7  |
| <i>u</i> <sub>826</sub>  | H(80)...H(119)   | 400.7(95)  | 51.6(fixed)                            | — | 3.8  | 51.6  |
| <i>u</i> <sub>1008</sub> | H(75)...H(90)    | 400.9(118) | 73.6(fixed)                            | — | 9.3  | 73.6  |
| <i>u</i> <sub>658</sub>  | C(19)...H(62)    | 401.0(69)  | 53.1(fixed)                            | — | 0.7  | 53.1  |
| <i>u</i> <sub>957</sub>  | H(132)...H(181)  | 401.3(100) | 76.9(fixed)                            | — | 3.8  | 76.9  |
| <i>u</i> <sub>734</sub>  | H(13)...C(56)    | 401.8(63)  | 53.2(fixed)                            | — | -1.6 | 53.2  |
| <i>u</i> <sub>706</sub>  | Si(65)...H(120)  | 402.0(89)  | 41.2(fixed)                            | — | 1.2  | 41.2  |
| <i>u</i> <sub>751</sub>  | Si(127)...C(147) | 402.3(55)  | 27.1(tied to <i>u</i> <sub>655</sub> ) | — | 0.2  | 25.5  |
| <i>u</i> <sub>773</sub>  | H(72)...H(108)   | 402.8(173) | 63.4(fixed)                            | — | 17.8 | 63.4  |
| <i>u</i> <sub>870</sub>  | Si(66)...H(76)   | 403.1(69)  | 49.5(fixed)                            | — | 1.5  | 49.5  |
| <i>u</i> <sub>746</sub>  | Si(63)...Si(66)  | 403.4(9)   | 15.2(tied to <i>u</i> <sub>655</sub> ) | — | -0.2 | 14.4  |
| <i>u</i> <sub>911</sub>  | C(131)...C(179)  | 403.7(71)  | 60.3(tied to <i>u</i> <sub>874</sub> ) | — | 1.7  | 55.2  |
| <i>u</i> <sub>924</sub>  | H(10)...C(27)    | 404.4(111) | 87.9(fixed)                            | — | 5.0  | 87.9  |
| <i>u</i> <sub>648</sub>  | H(137)...C(180)  | 404.5(63)  | 55.0(fixed)                            | — | 0.8  | 55.0  |
| <i>u</i> <sub>792</sub>  | Si(127)...C(179) | 404.6(46)  | 41.4(tied to <i>u</i> <sub>655</sub> ) | — | -0.1 | 39.1  |
| <i>u</i> <sub>754</sub>  | Si(1)...Si(4)    | 404.7(9)   | 15.5(tied to <i>u</i> <sub>655</sub> ) | — | -0.2 | 14.7  |
| <i>u</i> <sub>679</sub>  | H(74)...H(87)    | 404.8(108) | 49.6(fixed)                            | — | 20.3 | 49.6  |
| <i>u</i> <sub>841</sub>  | H(25)...H(62)    | 405.0(102) | 66.0(fixed)                            | — | 0.7  | 66.0  |
| <i>u</i> <sub>664</sub>  | H(75)...H(86)    | 405.1(140) | 76.1(fixed)                            | — | 3.6  | 76.1  |
| <i>u</i> <sub>1044</sub> | H(132)...H(182)  | 405.1(112) | 81.7(fixed)                            | — | -1.5 | 81.7  |
| <i>u</i> <sub>796</sub>  | Si(127)...H(166) | 405.5(118) | 51.7(fixed)                            | — | 9.7  | 51.7  |
| <i>u</i> <sub>783</sub>  | H(72)...H(120)   | 405.6(143) | 73.1(fixed)                            | — | 4.2  | 73.1  |
| <i>u</i> <sub>670</sub>  | H(79)...H(121)   | 406.0(102) | 49.1(fixed)                            | — | 17.2 | 49.1  |
| <i>u</i> <sub>381</sub>  | H(29)...H(53)    | 406.0(280) | 110.1(fixed)                           | — | 23.9 | 110.1 |
| <i>u</i> <sub>683</sub>  | Si(63)...H(82)   | 406.0(41)  | 42.0(fixed)                            | — | 7.7  | 42.0  |
| <i>u</i> <sub>743</sub>  | Si(128)...C(131) | 406.1(60)  | 27.9(tied to <i>u</i> <sub>655</sub> ) | — | 1.2  | 26.4  |
| <i>u</i> <sub>835</sub>  | H(71)...H(106)   | 406.2(201) | 60.9(fixed)                            | — | 12.2 | 60.9  |
| <i>u</i> <sub>809</sub>  | C(23)...C(56)    | 406.8(52)  | 41.6(tied to <i>u</i> <sub>874</sub> ) | — | -0.9 | 38.0  |
| <i>u</i> <sub>852</sub>  | H(14)...C(23)    | 406.9(88)  | 60.0(fixed)                            | — | 5.3  | 60.0  |
| <i>u</i> <sub>709</sub>  | C(143)...H(186)  | 407.2(67)  | 57.1(fixed)                            | — | -1.0 | 57.1  |
| <i>u</i> <sub>1042</sub> | H(154)...H(182)  | 407.5(81)  | 74.0(fixed)                            | — | -1.9 | 74.0  |
| <i>u</i> <sub>877</sub>  | H(71)...H(119)   | 407.5(123) | 68.2(fixed)                            | — | 5.2  | 68.2  |
| <i>u</i> <sub>785</sub>  | C(15)...C(56)    | 407.5(35)  | 35.2(tied to <i>u</i> <sub>655</sub> ) | — | -1.0 | 33.2  |
| <i>u</i> <sub>797</sub>  | C(139)...H(185)  | 407.6(51)  | 48.6(fixed)                            | — | 7.2  | 48.6  |



|                          |                  |            |                                        |   |      |       |
|--------------------------|------------------|------------|----------------------------------------|---|------|-------|
| <i>u</i> <sub>811</sub>  | Si(66)...C(73)   | 407.6(46)  | 28.6(tied to <i>u</i> <sub>655</sub> ) | — | 2.2  | 27.0  |
| <i>u</i> <sub>769</sub>  | Si(3)...C(23)    | 408.1(50)  | 30.8(tied to <i>u</i> <sub>655</sub> ) | — | 4.1  | 29.1  |
| <i>u</i> <sub>955</sub>  | C(7)...C(27)     | 408.2(99)  | 75.9(tied to <i>u</i> <sub>874</sub> ) | — | 2.1  | 69.4  |
| <i>u</i> <sub>814</sub>  | H(140)...C(180)  | 408.3(43)  | 43.8(fixed)                            | — | 3.6  | 43.8  |
| <i>u</i> <sub>970</sub>  | H(133)...H(182)  | 408.5(96)  | 92.1(fixed)                            | — | 7.5  | 92.1  |
| <i>u</i> <sub>858</sub>  | Si(66)...H(95)   | 408.5(96)  | 49.4(fixed)                            | — | 14.1 | 49.4  |
| <i>u</i> <sub>733</sub>  | H(148)...H(184)  | 409.0(97)  | 59.4(fixed)                            | — | 3.8  | 59.4  |
| <i>u</i> <sub>968</sub>  | H(138)...C(147)  | 409.5(88)  | 54.5(fixed)                            | — | -2.5 | 54.5  |
| <i>u</i> <sub>995</sub>  | H(8)...H(28)     | 409.9(117) | 93.4(fixed)                            | — | 6.4  | 93.4  |
| <i>u</i> <sub>885</sub>  | C(7)...C(43)     | 410.1(109) | 55.1(tied to <i>u</i> <sub>874</sub> ) | — | 5.5  | 50.4  |
| <i>u</i> <sub>1056</sub> | H(10)...H(30)    | 410.5(141) | 101.8(fixed)                           | — | 2.1  | 101.8 |
| <i>u</i> <sub>1061</sub> | H(75)...H(92)    | 410.5(148) | 76.8(fixed)                            | — | 1.6  | 76.8  |
| <i>u</i> <sub>1014</sub> | H(18)...H(45)    | 410.7(124) | 89.2(fixed)                            | — | 4.7  | 89.2  |
| <i>u</i> <sub>788</sub>  | H(132)...H(142)  | 410.8(18)  | 27.6(fixed)                            | — | -4.8 | 27.6  |
| <i>u</i> <sub>863</sub>  | H(13)...H(16)    | 411.2(35)  | 29.9(fixed)                            | — | -5.7 | 29.9  |
| <i>u</i> <sub>923</sub>  | Si(3)...H(29)    | 411.2(78)  | 65.1(fixed)                            | — | 6.4  | 65.1  |
| <i>u</i> <sub>793</sub>  | H(146)...H(149)  | 411.9(15)  | 26.9(fixed)                            | — | -4.7 | 26.9  |
| <i>u</i> <sub>917</sub>  | C(15)...H(58)    | 412.0(79)  | 54.3(fixed)                            | — | -0.4 | 54.3  |
| <i>u</i> <sub>729</sub>  | C(143)...C(175)  | 412.2(102) | 42.0(tied to <i>u</i> <sub>874</sub> ) | — | 6.0  | 38.4  |
| <i>u</i> <sub>784</sub>  | Si(3)...H(24)    | 412.7(74)  | 53.7(fixed)                            | — | 3.8  | 53.7  |
| <i>u</i> <sub>791</sub>  | H(133)...H(140)  | 412.7(20)  | 27.2(fixed)                            | — | -3.1 | 27.2  |
| <i>u</i> <sub>789</sub>  | H(22)...H(25)    | 412.8(15)  | 28.2(fixed)                            | — | -4.8 | 28.2  |
| <i>u</i> <sub>816</sub>  | H(136)...H(141)  | 412.8(31)  | 28.1(fixed)                            | — | -4.0 | 28.1  |
| <i>u</i> <sub>937</sub>  | C(131)...H(154)  | 413.1(133) | 50.4(fixed)                            | — | 0.2  | 50.4  |
| <i>u</i> <sub>867</sub>  | H(14)...H(17)    | 413.1(37)  | 30.9(fixed)                            | — | -5.4 | 30.9  |
| <i>u</i> <sub>798</sub>  | H(144)...H(150)  | 413.2(15)  | 28.3(fixed)                            | — | -3.5 | 28.3  |
| <i>u</i> <sub>1012</sub> | H(134)...H(183)  | 413.3(94)  | 76.2(fixed)                            | — | 6.2  | 76.2  |
| <i>u</i> <sub>868</sub>  | H(148)...H(153)  | 413.5(33)  | 28.7(fixed)                            | — | -5.4 | 28.7  |
| <i>u</i> <sub>800</sub>  | H(74)...H(79)    | 413.6(33)  | 27.1(fixed)                            | — | -4.2 | 27.1  |
| <i>u</i> <sub>756</sub>  | C(147)...C(180)  | 413.6(50)  | 30.7(tied to <i>u</i> <sub>655</sub> ) | — | -0.7 | 29.0  |
| <i>u</i> <sub>688</sub>  | H(149)...H(186)  | 413.9(100) | 56.6(fixed)                            | — | 6.3  | 56.6  |
| <i>u</i> <sub>790</sub>  | H(20)...H(26)    | 414.0(15)  | 28.6(fixed)                            | — | -3.7 | 28.6  |
| <i>u</i> <sub>672</sub>  | H(141)...H(181)  | 414.0(102) | 72.0(fixed)                            | — | 2.8  | 72.0  |
| <i>u</i> <sub>866</sub>  | H(25)...H(30)    | 414.3(31)  | 29.8(fixed)                            | — | -5.8 | 29.8  |
| <i>u</i> <sub>818</sub>  | H(137)...H(142)  | 414.7(29)  | 28.2(fixed)                            | — | -4.9 | 28.2  |
| <i>u</i> <sub>872</sub>  | H(149)...H(154)  | 414.8(32)  | 28.7(fixed)                            | — | -4.6 | 28.7  |
| <i>u</i> <sub>669</sub>  | H(140)...H(182)  | 415.1(101) | 83.7(fixed)                            | — | 12.2 | 83.7  |
| <i>u</i> <sub>1037</sub> | C(73)...C(89)    | 415.2(103) | 58.8(tied to <i>u</i> <sub>874</sub> ) | — | 0.6  | 53.7  |
| <i>u</i> <sub>854</sub>  | Si(127)...H(181) | 415.4(61)  | 52.3(fixed)                            | — | -0.3 | 52.3  |
| <i>u</i> <sub>808</sub>  | H(12)...H(17)    | 415.4(32)  | 28.2(fixed)                            | — | -4.4 | 28.2  |
| <i>u</i> <sub>445</sub>  | C(27)...H(53)    | 415.5(178) | 75.3(fixed)                            | — | 32.9 | 75.3  |
| <i>u</i> <sub>934</sub>  | H(57)...H(60)    | 415.6(79)  | 53.0(fixed)                            | — | -4.9 | 53.0  |
| <i>u</i> <sub>757</sub>  | C(15)...C(43)    | 415.7(78)  | 55.8(tied to <i>u</i> <sub>874</sub> ) | — | 9.3  | 51.0  |
| <i>u</i> <sub>873</sub>  | H(24)...H(29)    | 415.8(33)  | 29.6(fixed)                            | — | -5.1 | 29.6  |
| <i>u</i> <sub>824</sub>  | H(86)...H(90)    | 416.0(25)  | 28.0(fixed)                            | — | -4.9 | 28.0  |
| <i>u</i> <sub>761</sub>  | H(133)...H(149)  | 416.0(138) | 67.0(fixed)                            | — | 9.4  | 67.0  |

|                          |                  |            |                                        |   |      |      |
|--------------------------|------------------|------------|----------------------------------------|---|------|------|
| <i>u</i> <sub>767</sub>  | H(75)...H(88)    | 416.3(108) | 53.0(fixed)                            | — | 11.3 | 53.0 |
| <i>u</i> <sub>804</sub>  | H(75)...H(80)    | 416.4(30)  | 27.7(fixed)                            | — | -3.5 | 27.7 |
| <i>u</i> <sub>831</sub>  | Si(127)...H(148) | 416.6(77)  | 46.6(fixed)                            | — | -0.9 | 46.6 |
| <i>u</i> <sub>606</sub>  | Si(66)...H(116)  | 416.6(90)  | 53.1(fixed)                            | — | 15.8 | 53.1 |
| <i>u</i> <sub>890</sub>  | H(75)...H(78)    | 416.9(35)  | 28.3(fixed)                            | — | -4.6 | 28.3 |
| <i>u</i> <sub>830</sub>  | H(8)...H(18)     | 417.1(18)  | 30.5(fixed)                            | — | -5.4 | 30.5 |
| <i>u</i> <sub>810</sub>  | H(13)...H(18)    | 417.2(29)  | 27.8(fixed)                            | — | -4.8 | 27.8 |
| <i>u</i> <sub>827</sub>  | H(24)...H(28)    | 417.3(25)  | 30.0(fixed)                            | — | -5.3 | 30.0 |
| <i>u</i> <sub>1043</sub> | H(9)...H(29)     | 417.6(126) | 95.1(fixed)                            | — | 9.5  | 95.1 |
| <i>u</i> <sub>781</sub>  | H(83)...H(124)   | 417.7(93)  | 64.0(fixed)                            | — | 2.4  | 64.0 |
| <i>u</i> <sub>772</sub>  | H(141)...H(183)  | 417.8(93)  | 81.6(fixed)                            | — | 5.4  | 81.6 |
| <i>u</i> <sub>850</sub>  | H(137)...H(140)  | 417.8(33)  | 27.5(fixed)                            | — | -5.0 | 27.5 |
| <i>u</i> <sub>829</sub>  | H(9)...H(16)     | 417.8(19)  | 29.7(fixed)                            | — | -4.9 | 29.7 |
| <i>u</i> <sub>832</sub>  | H(26)...H(30)    | 417.9(21)  | 30.8(fixed)                            | — | -6.1 | 30.8 |
| <i>u</i> <sub>813</sub>  | H(82)...H(88)    | 417.9(14)  | 28.8(fixed)                            | — | -4.2 | 28.8 |
| <i>u</i> <sub>828</sub>  | H(88)...H(92)    | 418.0(23)  | 28.0(fixed)                            | — | -4.4 | 28.0 |
| <i>u</i> <sub>822</sub>  | H(84)...H(87)    | 418.3(15)  | 28.8(fixed)                            | — | -5.1 | 28.8 |
| <i>u</i> <sub>758</sub>  | H(132)...H(150)  | 418.5(129) | 69.4(fixed)                            | — | 8.3  | 69.4 |
| <i>u</i> <sub>919</sub>  | Si(65)...C(89)   | 418.6(58)  | 36.7(tied to <i>u</i> <sub>874</sub> ) | — | 0.3  | 33.6 |
| <i>u</i> <sub>922</sub>  | C(69)...C(117)   | 419.1(101) | 56.5(tied to <i>u</i> <sub>655</sub> ) | — | 0.6  | 53.4 |
| <i>u</i> <sub>821</sub>  | H(84)...H(91)    | 419.2(15)  | 29.2(fixed)                            | — | -4.9 | 29.2 |
| <i>u</i> <sub>900</sub>  | H(76)...H(79)    | 419.4(37)  | 27.8(fixed)                            | — | -5.1 | 27.8 |
| <i>u</i> <sub>898</sub>  | H(87)...H(92)    | 419.4(30)  | 29.8(fixed)                            | — | -5.2 | 29.8 |
| <i>u</i> <sub>1024</sub> | H(76)...H(88)    | 419.4(98)  | 66.6(fixed)                            | — | 1.4  | 66.6 |
| <i>u</i> <sub>768</sub>  | Si(63)...H(79)   | 419.5(55)  | 38.4(fixed)                            | — | 8.7  | 38.4 |
| <i>u</i> <sub>1063</sub> | H(74)...H(91)    | 419.5(137) | 75.0(fixed)                            | — | 8.4  | 75.0 |
| <i>u</i> <sub>839</sub>  | H(145)...H(152)  | 419.7(17)  | 28.3(fixed)                            | — | -4.6 | 28.3 |
| <i>u</i> <sub>747</sub>  | C(73)...C(118)   | 419.7(41)  | 37.2(tied to <i>u</i> <sub>874</sub> ) | — | -0.3 | 34.0 |
| <i>u</i> <sub>682</sub>  | H(17)...H(46)    | 419.9(103) | 61.5(fixed)                            | — | 15.7 | 61.5 |
| <i>u</i> <sub>848</sub>  | H(70)...H(80)    | 420.0(17)  | 27.1(fixed)                            | — | -4.2 | 27.1 |
| <i>u</i> <sub>825</sub>  | H(71)...H(76)    | 420.1(21)  | 27.7(fixed)                            | — | -4.2 | 27.7 |
| <i>u</i> <sub>578</sub>  | H(84)...H(116)   | 420.2(142) | 65.7(fixed)                            | — | 20.6 | 65.7 |
| <i>u</i> <sub>840</sub>  | H(83)...H(87)    | 420.3(19)  | 28.6(fixed)                            | — | -5.2 | 28.6 |
| <i>u</i> <sub>764</sub>  | H(142)...H(182)  | 420.4(82)  | 78.3(fixed)                            | — | 16.5 | 78.3 |
| <i>u</i> <sub>838</sub>  | H(71)...H(78)    | 420.5(20)  | 26.8(fixed)                            | — | -4.4 | 26.8 |
| <i>u</i> <sub>932</sub>  | Si(128)...H(181) | 420.7(43)  | 44.2(fixed)                            | — | 7.8  | 44.2 |
| <i>u</i> <sub>833</sub>  | H(21)...H(28)    | 421.1(18)  | 29.7(fixed)                            | — | -4.2 | 29.7 |
| <i>u</i> <sub>894</sub>  | H(86)...H(91)    | 421.1(33)  | 29.7(fixed)                            | — | -5.4 | 29.7 |
| <i>u</i> <sub>823</sub>  | H(83)...H(90)    | 421.2(19)  | 28.9(fixed)                            | — | -4.4 | 28.9 |
| <i>u</i> <sub>979</sub>  | H(72)...H(121)   | 421.3(124) | 75.6(fixed)                            | — | 8.1  | 75.6 |
| <i>u</i> <sub>834</sub>  | H(72)...H(74)    | 421.3(23)  | 28.2(fixed)                            | — | -4.7 | 28.2 |
| <i>u</i> <sub>855</sub>  | H(146)...H(153)  | 421.4(18)  | 29.6(fixed)                            | — | -5.0 | 29.6 |
| <i>u</i> <sub>847</sub>  | H(22)...H(29)    | 421.4(16)  | 29.0(fixed)                            | — | -5.8 | 29.0 |
| <i>u</i> <sub>842</sub>  | H(148)...H(152)  | 421.4(25)  | 28.8(fixed)                            | — | -5.3 | 28.8 |
| <i>u</i> <sub>845</sub>  | H(150)...H(154)  | 421.4(21)  | 29.4(fixed)                            | — | -4.7 | 29.4 |
| <i>u</i> <sub>770</sub>  | H(20)...C(56)    | 421.4(66)  | 52.6(fixed)                            | — | -0.2 | 52.6 |

|                          |                  |            |                                        |   |      |      |
|--------------------------|------------------|------------|----------------------------------------|---|------|------|
| <i>u</i> <sub>705</sub>  | H(76)...H(123)   | 421.6(71)  | 62.9(fixed)                            | — | 2.8  | 62.9 |
| <i>u</i> <sub>864</sub>  | H(72)...H(75)    | 421.8(25)  | 27.6(fixed)                            | — | -4.8 | 27.6 |
| <i>u</i> <sub>896</sub>  | H(20)...H(29)    | 421.8(15)  | 28.6(fixed)                            | — | -6.3 | 28.6 |
| <i>u</i> <sub>901</sub>  | H(134)...H(137)  | 421.9(24)  | 29.3(fixed)                            | — | -5.4 | 29.3 |
| <i>u</i> <sub>843</sub>  | H(10)...H(12)    | 422.0(21)  | 29.9(fixed)                            | — | -5.3 | 29.9 |
| <i>u</i> <sub>657</sub>  | H(10)...H(52)    | 422.3(112) | 90.3(fixed)                            | — | 19.0 | 90.3 |
| <i>u</i> <sub>660</sub>  | H(146)...H(178)  | 422.3(164) | 46.2(fixed)                            | — | 13.0 | 46.2 |
| <i>u</i> <sub>820</sub>  | C(73)...H(86)    | 422.4(119) | 65.7(fixed)                            | — | 3.1  | 65.7 |
| <i>u</i> <sub>778</sub>  | H(82)...H(122)   | 422.4(92)  | 60.7(fixed)                            | — | 1.2  | 60.7 |
| <i>u</i> <sub>856</sub>  | H(82)...H(86)    | 422.6(19)  | 30.9(fixed)                            | — | -4.7 | 30.9 |
| <i>u</i> <sub>836</sub>  | H(9)...H(14)     | 422.7(21)  | 29.7(fixed)                            | — | -5.2 | 29.7 |
| <i>u</i> <sub>876</sub>  | Si(65)...H(106)  | 422.8(107) | 50.6(fixed)                            | — | 9.7  | 50.6 |
| <i>u</i> <sub>801</sub>  | C(81)...C(118)   | 422.9(46)  | 39.0(tied to <i>u</i> <sub>874</sub> ) | — | -1.3 | 35.7 |
| <i>u</i> <sub>869</sub>  | H(8)...H(14)     | 423.0(24)  | 30.1(fixed)                            | — | -5.4 | 30.1 |
| <i>u</i> <sub>882</sub>  | H(132)...H(138)  | 423.4(25)  | 28.9(fixed)                            | — | -4.7 | 28.9 |
| <i>u</i> <sub>880</sub>  | H(10)...H(13)    | 423.5(25)  | 30.1(fixed)                            | — | -5.5 | 30.1 |
| <i>u</i> <sub>969</sub>  | H(153)...C(179)  | 423.6(94)  | 69.1(fixed)                            | — | 2.0  | 69.1 |
| <i>u</i> <sub>857</sub>  | H(138)...H(141)  | 423.6(36)  | 28.9(fixed)                            | — | -4.0 | 28.9 |
| <i>u</i> <sub>903</sub>  | H(132)...H(141)  | 423.7(21)  | 28.1(fixed)                            | — | -6.0 | 28.1 |
| <i>u</i> <sub>802</sub>  | C(131)...C(147)  | 423.8(107) | 47.1(tied to <i>u</i> <sub>874</sub> ) | — | 0.7  | 43.1 |
| <i>u</i> <sub>748</sub>  | Si(1)...H(30)    | 423.8(53)  | 52.7(fixed)                            | — | 10.8 | 52.7 |
| <i>u</i> <sub>765</sub>  | Si(4)...H(42)    | 423.9(81)  | 43.4(fixed)                            | — | 13.1 | 43.4 |
| <i>u</i> <sub>879</sub>  | H(96)...H(99)    | 424.1(26)  | 28.4(fixed)                            | — | -4.2 | 28.4 |
| <i>u</i> <sub>878</sub>  | H(70)...H(76)    | 424.1(26)  | 28.4(fixed)                            | — | -4.2 | 28.4 |
| <i>u</i> <sub>906</sub>  | Si(4)...C(7)     | 424.1(56)  | 37.9(tied to <i>u</i> <sub>874</sub> ) | — | -0.1 | 34.6 |
| <i>u</i> <sub>905</sub>  | H(134)...H(140)  | 424.7(24)  | 29.4(fixed)                            | — | -4.6 | 29.4 |
| <i>u</i> <sub>777</sub>  | H(132)...H(148)  | 424.8(143) | 59.1(fixed)                            | — | 3.8  | 59.1 |
| <i>u</i> <sub>904</sub>  | H(83)...H(92)    | 425.0(19)  | 29.4(fixed)                            | — | -5.3 | 29.4 |
| <i>u</i> <sub>819</sub>  | Si(128)...H(134) | 425.1(77)  | 49.5(fixed)                            | — | 0.0  | 49.5 |
| <i>u</i> <sub>891</sub>  | H(145)...H(149)  | 425.1(19)  | 29.3(fixed)                            | — | -6.1 | 29.3 |
| <i>u</i> <sub>1020</sub> | H(145)...H(176)  | 425.2(81)  | 75.3(fixed)                            | — | 1.5  | 75.3 |
| <i>u</i> <sub>851</sub>  | H(133)...H(138)  | 425.4(20)  | 29.5(fixed)                            | — | -4.7 | 29.5 |
| <i>u</i> <sub>897</sub>  | H(21)...H(30)    | 426.0(20)  | 28.6(fixed)                            | — | -4.1 | 28.6 |
| <i>u</i> <sub>886</sub>  | H(144)...H(148)  | 426.0(19)  | 29.2(fixed)                            | — | -4.7 | 29.2 |
| <i>u</i> <sub>893</sub>  | H(144)...H(153)  | 426.1(14)  | 27.9(fixed)                            | — | -5.2 | 27.9 |
| <i>u</i> <sub>853</sub>  | H(134)...H(136)  | 426.2(22)  | 28.3(fixed)                            | — | -5.0 | 28.3 |
| <i>u</i> <sub>1026</sub> | C(151)...C(179)  | 426.7(49)  | 53.3(tied to <i>u</i> <sub>874</sub> ) | — | 0.4  | 48.8 |
| <i>u</i> <sub>806</sub>  | C(139)...C(179)  | 426.7(70)  | 59.4(tied to <i>u</i> <sub>874</sub> ) | — | 1.8  | 54.4 |
| <i>u</i> <sub>889</sub>  | H(21)...H(25)    | 427.3(19)  | 28.9(fixed)                            | — | -6.2 | 28.9 |
| <i>u</i> <sub>913</sub>  | H(82)...H(91)    | 427.3(17)  | 27.8(fixed)                            | — | -5.3 | 27.8 |
| <i>u</i> <sub>887</sub>  | H(72)...H(78)    | 427.5(23)  | 27.9(fixed)                            | — | -4.7 | 27.9 |
| <i>u</i> <sub>780</sub>  | H(134)...H(149)  | 427.6(142) | 62.3(fixed)                            | — | 4.7  | 62.3 |
| <i>u</i> <sub>1065</sub> | H(154)...H(183)  | 427.6(61)  | 72.0(fixed)                            | — | 2.3  | 72.0 |
| <i>u</i> <sub>776</sub>  | Si(128)...H(178) | 428.1(135) | 42.4(fixed)                            | — | 11.5 | 42.4 |
| <i>u</i> <sub>862</sub>  | H(144)...C(180)  | 428.2(64)  | 42.7(fixed)                            | — | -1.8 | 42.7 |
| <i>u</i> <sub>899</sub>  | H(20)...H(24)    | 428.3(18)  | 29.4(fixed)                            | — | -4.9 | 29.4 |

|                          |                  |            |                                        |          |      |      |
|--------------------------|------------------|------------|----------------------------------------|----------|------|------|
| <i>u</i> <sub>942</sub>  | H(87)...H(122)   | 428.3(96)  | 66.2(fixed)                            | —        | -6.7 | 66.2 |
| <i>u</i> <sub>775</sub>  | H(28)...H(54)    | 428.5(90)  | 65.3(fixed)                            | —        | 28.3 | 65.3 |
| <i>u</i> <sub>925</sub>  | H(88)...H(124)   | 428.5(47)  | 47.3(fixed)                            | —        | -3.7 | 47.3 |
| <i>u</i> <sub>1022</sub> | H(140)...H(186)  | 428.8(64)  | 59.9(fixed)                            | —        | 0.1  | 59.9 |
| <i>u</i> <sub>874</sub>  | Si(1)...C(15)    | 428.8(41)  | 27.5(19)                               | 25.2(25) | 0.7  | 25.2 |
| <i>u</i> <sub>892</sub>  | H(70)...H(79)    | 429.3(21)  | 28.2(fixed)                            | —        | -4.6 | 28.2 |
| <i>u</i> <sub>959</sub>  | Si(63)...C(69)   | 429.5(39)  | 35.6(tied to <i>u</i> <sub>874</sub> ) | —        | 0.9  | 32.6 |
| <i>u</i> <sub>953</sub>  | H(80)...H(123)   | 429.7(48)  | 47.0(fixed)                            | —        | -1.1 | 47.0 |
| <i>u</i> <sub>635</sub>  | C(27)...C(51)    | 430.1(95)  | 49.1(tied to <i>u</i> <sub>874</sub> ) | —        | 26.9 | 44.9 |
| <i>u</i> <sub>902</sub>  | H(145)...H(154)  | 430.7(20)  | 28.4(fixed)                            | —        | -4.7 | 28.4 |
| <i>u</i> <sub>918</sub>  | Si(125)...H(144) | 430.9(55)  | 33.1(fixed)                            | —        | 5.8  | 33.1 |
| <i>u</i> <sub>977</sub>  | Si(3)...C(55)    | 430.9(50)  | 27.1(tied to <i>u</i> <sub>874</sub> ) | —        | -0.5 | 24.8 |
| <i>u</i> <sub>949</sub>  | Si(128)...C(167) | 431.0(77)  | 34.8(tied to <i>u</i> <sub>874</sub> ) | —        | 2.6  | 31.8 |
| <i>u</i> <sub>962</sub>  | H(16)...H(45)    | 431.0(118) | 90.8(fixed)                            | —        | 5.8  | 90.8 |
| <i>u</i> <sub>915</sub>  | H(10)...H(16)    | 431.3(23)  | 29.7(fixed)                            | —        | -5.7 | 29.7 |
| <i>u</i> <sub>715</sub>  | H(75)...H(124)   | 431.3(79)  | 62.1(fixed)                            | —        | 1.3  | 62.1 |
| <i>u</i> <sub>1067</sub> | H(153)...H(182)  | 431.4(90)  | 87.3(fixed)                            | —        | 0.1  | 87.3 |
| <i>u</i> <sub>929</sub>  | C(69)...H(92)    | 431.5(114) | 75.4(fixed)                            | —        | 4.8  | 75.4 |
| <i>u</i> <sub>910</sub>  | H(8)...H(17)     | 431.7(20)  | 28.8(fixed)                            | —        | -5.8 | 28.8 |
| <i>u</i> <sub>849</sub>  | H(78)...C(117)   | 431.8(93)  | 61.9(fixed)                            | —        | -0.2 | 61.9 |
| <i>u</i> <sub>947</sub>  | Si(125)...H(134) | 431.8(53)  | 51.6(fixed)                            | —        | 5.6  | 51.6 |
| <i>u</i> <sub>964</sub>  | Si(1)...H(62)    | 432.8(22)  | 15.4(fixed)                            | —        | -4.4 | 15.4 |
| <i>u</i> <sub>744</sub>  | H(144)...H(177)  | 432.9(172) | 43.6(fixed)                            | —        | 6.7  | 43.6 |
| <i>u</i> <sub>936</sub>  | Si(1)...H(10)    | 433.5(52)  | 45.6(fixed)                            | —        | 6.9  | 45.6 |
| <i>u</i> <sub>956</sub>  | C(15)...H(62)    | 433.9(51)  | 46.0(fixed)                            | —        | -2.6 | 46.0 |
| <i>u</i> <sub>933</sub>  | H(78)...H(122)   | 434.1(39)  | 47.7(fixed)                            | —        | 4.2  | 47.7 |
| <i>u</i> <sub>971</sub>  | C(139)...C(180)  | 434.3(33)  | 31.8(tied to <i>u</i> <sub>874</sub> ) | —        | -1.1 | 29.1 |
| <i>u</i> <sub>994</sub>  | Si(125)...H(186) | 434.4(21)  | 17.8(fixed)                            | —        | -7.4 | 17.8 |
| <i>u</i> <sub>837</sub>  | H(72)...H(91)    | 435.1(109) | 80.6(fixed)                            | —        | 5.7  | 80.6 |
| <i>u</i> <sub>1032</sub> | H(141)...H(185)  | 435.2(67)  | 56.8(fixed)                            | —        | 4.7  | 56.8 |
| <i>u</i> <sub>985</sub>  | Si(128)...C(135) | 435.2(47)  | 28.8(tied to <i>u</i> <sub>874</sub> ) | —        | -0.4 | 26.4 |
| <i>u</i> <sub>908</sub>  | H(12)...H(62)    | 435.6(56)  | 53.3(fixed)                            | —        | -3.0 | 53.3 |
| <i>u</i> <sub>967</sub>  | Si(4)...C(11)    | 435.8(44)  | 26.4(tied to <i>u</i> <sub>874</sub> ) | —        | -0.2 | 24.2 |
| <i>u</i> <sub>1027</sub> | H(17)...C(56)    | 435.8(48)  | 44.6(fixed)                            | —        | -2.9 | 44.6 |
| <i>u</i> <sub>846</sub>  | H(8)...H(24)     | 436.2(142) | 79.7(fixed)                            | —        | 3.6  | 79.7 |
| <i>u</i> <sub>921</sub>  | H(86)...H(123)   | 436.6(37)  | 46.8(fixed)                            | —        | 5.5  | 46.8 |
| <i>u</i> <sub>993</sub>  | Si(127)...C(151) | 436.6(64)  | 26.0(tied to <i>u</i> <sub>874</sub> ) | —        | -0.2 | 23.7 |
| <i>u</i> <sub>875</sub>  | Si(125)...C(139) | 437.0(39)  | 30.6(tied to <i>u</i> <sub>874</sub> ) | —        | 1.4  | 27.9 |
| <i>u</i> <sub>939</sub>  | Si(1)...H(20)    | 437.1(53)  | 43.7(fixed)                            | —        | 7.2  | 43.7 |
| <i>u</i> <sub>960</sub>  | H(138)...H(184)  | 437.2(51)  | 49.8(fixed)                            | —        | -1.3 | 49.8 |
| <i>u</i> <sub>916</sub>  | C(69)...C(89)    | 438.1(84)  | 58.6(tied to <i>u</i> <sub>874</sub> ) | —        | 4.3  | 53.6 |
| <i>u</i> <sub>990</sub>  | Si(63)...H(124)  | 438.3(22)  | 15.6(fixed)                            | —        | -3.7 | 15.6 |
| <i>u</i> <sub>817</sub>  | C(81)...H(115)   | 438.5(84)  | 84.9(fixed)                            | —        | 5.4  | 84.9 |
| <i>u</i> <sub>1121</sub> | C(117)...H(122)  | 438.6(77)  | 35.5(fixed)                            | —        | -2.9 | 35.5 |
| <i>u</i> <sub>940</sub>  | H(12)...H(24)    | 438.6(111) | 68.5(fixed)                            | —        | 7.3  | 68.5 |
| <i>u</i> <sub>1096</sub> | C(143)...H(170)  | 439.0(181) | 57.5(fixed)                            | —        | 0.4  | 57.5 |

|                          |                  |            |                                        |   |      |      |
|--------------------------|------------------|------------|----------------------------------------|---|------|------|
| <i>u</i> <sub>974</sub>  | Si(63)...H(112)  | 439.0(6)   | 15.9(fixed)                            | — | -5.4 | 15.9 |
| <i>u</i> <sub>1097</sub> | Si(66)...H(96)   | 439.1(88)  | 63.2(fixed)                            | — | 5.3  | 63.2 |
| <i>u</i> <sub>950</sub>  | Si(65)...C(85)   | 439.1(55)  | 27.5(tied to <i>u</i> <sub>874</sub> ) | — | 0.5  | 25.2 |
| <i>u</i> <sub>738</sub>  | H(82)...H(114)   | 439.5(163) | 59.8(fixed)                            | — | 11.9 | 59.8 |
| <i>u</i> <sub>774</sub>  | Si(66)...H(106)  | 439.5(144) | 47.4(fixed)                            | — | 11.3 | 47.4 |
| <i>u</i> <sub>941</sub>  | Si(65)...H(122)  | 439.7(16)  | 15.5(fixed)                            | — | -3.7 | 15.5 |
| <i>u</i> <sub>1086</sub> | H(152)...H(181)  | 439.8(58)  | 65.4(fixed)                            | — | 7.2  | 65.4 |
| <i>u</i> <sub>945</sub>  | Si(3)...H(60)    | 440.1(16)  | 16.6(fixed)                            | — | -4.6 | 16.6 |
| <i>u</i> <sub>928</sub>  | H(71)...H(91)    | 440.3(101) | 67.1(fixed)                            | — | 11.4 | 67.1 |
| <i>u</i> <sub>844</sub>  | H(137)...H(185)  | 440.4(74)  | 72.2(fixed)                            | — | -5.6 | 72.2 |
| <i>u</i> <sub>912</sub>  | H(14)...H(60)    | 440.4(52)  | 55.1(fixed)                            | — | 2.6  | 55.1 |
| <i>u</i> <sub>1028</sub> | C(23)...H(60)    | 440.4(70)  | 51.6(fixed)                            | — | -4.1 | 51.6 |
| <i>u</i> <sub>986</sub>  | Si(1)...H(50)    | 440.9(6)   | 16.2(fixed)                            | — | -5.3 | 16.2 |
| <i>u</i> <sub>1036</sub> | Si(65)...H(107)  | 441.1(82)  | 54.7(fixed)                            | — | 6.2  | 54.7 |
| <i>u</i> <sub>952</sub>  | Si(128)...H(185) | 441.2(13)  | 17.7(fixed)                            | — | -7.5 | 17.7 |
| <i>u</i> <sub>654</sub>  | H(90)...H(116)   | 441.3(228) | 79.2(fixed)                            | — | 15.4 | 79.2 |
| <i>u</i> <sub>976</sub>  | Si(1)...H(38)    | 441.6(13)  | 16.3(fixed)                            | — | -5.7 | 16.3 |
| <i>u</i> <sub>1122</sub> | H(120)...H(124)  | 441.7(93)  | 46.9(fixed)                            | — | -0.5 | 46.9 |
| <i>u</i> <sub>978</sub>  | Si(125)...H(162) | 442.0(13)  | 15.9(fixed)                            | — | -4.9 | 15.9 |
| <i>u</i> <sub>958</sub>  | Si(4)...H(61)    | 442.0(13)  | 16.0(fixed)                            | — | -4.4 | 16.0 |
| <i>u</i> <sub>871</sub>  | Si(66)...H(70)   | 442.0(67)  | 48.9(fixed)                            | — | 6.2  | 48.9 |
| <i>u</i> <sub>861</sub>  | Si(127)...H(165) | 442.1(109) | 46.2(fixed)                            | — | 9.5  | 46.2 |
| <i>u</i> <sub>1180</sub> | C(7)...H(30)     | 442.1(127) | 80.0(fixed)                            | — | -4.1 | 80.0 |
| <i>u</i> <sub>1145</sub> | C(143)...H(169)  | 442.1(233) | 51.4(fixed)                            | — | -3.4 | 51.4 |
| <i>u</i> <sub>961</sub>  | H(13)...H(61)    | 442.2(74)  | 62.1(fixed)                            | — | -6.7 | 62.1 |
| <i>u</i> <sub>881</sub>  | H(9)...H(25)     | 442.2(127) | 79.1(fixed)                            | — | 16.5 | 79.1 |
| <i>u</i> <sub>948</sub>  | Si(66)...H(123)  | 442.4(13)  | 15.9(fixed)                            | — | -3.7 | 15.9 |
| <i>u</i> <sub>1000</sub> | Si(125)...C(151) | 442.7(44)  | 33.0(tied to <i>u</i> <sub>874</sub> ) | — | -0.4 | 30.2 |
| <i>u</i> <sub>980</sub>  | Si(125)...H(174) | 442.8(6)   | 16.0(fixed)                            | — | -5.6 | 16.0 |
| <i>u</i> <sub>984</sub>  | Si(63)...H(102)  | 442.8(12)  | 15.4(fixed)                            | — | -4.5 | 15.4 |
| <i>u</i> <sub>930</sub>  | C(7)...C(23)     | 443.5(101) | 56.4(tied to <i>u</i> <sub>874</sub> ) | — | 3.0  | 51.6 |
| <i>u</i> <sub>766</sub>  | H(83)...H(116)   | 443.7(208) | 56.2(fixed)                            | — | 11.6 | 56.2 |
| <i>u</i> <sub>1035</sub> | H(136)...H(148)  | 443.8(115) | 64.5(fixed)                            | — | -2.1 | 64.5 |
| <i>u</i> <sub>1114</sub> | Si(3)...H(45)    | 443.9(110) | 69.0(fixed)                            | — | -0.3 | 69.0 |
| <i>u</i> <sub>860</sub>  | Si(4)...H(54)    | 444.0(62)  | 56.8(fixed)                            | — | 16.7 | 56.8 |
| <i>u</i> <sub>1006</sub> | Si(3)...C(43)    | 444.0(63)  | 47.1(tied to <i>u</i> <sub>874</sub> ) | — | 4.6  | 43.1 |
| <i>u</i> <sub>992</sub>  | Si(127)...H(184) | 444.2(16)  | 16.9(fixed)                            | — | -6.4 | 16.9 |
| <i>u</i> <sub>944</sub>  | H(136)...H(186)  | 444.5(55)  | 51.4(fixed)                            | — | 2.8  | 51.4 |
| <i>u</i> <sub>1013</sub> | Si(1)...H(32)    | 445.0(13)  | 15.8(fixed)                            | — | -5.6 | 15.8 |
| <i>u</i> <sub>951</sub>  | Si(63)...C(81)   | 445.0(38)  | 28.6(tied to <i>u</i> <sub>874</sub> ) | — | 1.1  | 26.2 |
| <i>u</i> <sub>1017</sub> | Si(125)...H(176) | 445.0(8)   | 15.5(fixed)                            | — | -5.0 | 15.5 |
| <i>u</i> <sub>1005</sub> | Si(125)...H(156) | 445.1(13)  | 15.7(fixed)                            | — | -5.2 | 15.7 |
| <i>u</i> <sub>1178</sub> | C(7)...H(45)     | 445.2(151) | 65.5(fixed)                            | — | -3.3 | 65.5 |
| <i>u</i> <sub>1010</sub> | Si(63)...H(114)  | 445.4(8)   | 15.4(fixed)                            | — | -4.9 | 15.4 |
| <i>u</i> <sub>1033</sub> | Si(4)...H(10)    | 445.4(72)  | 53.9(fixed)                            | — | -1.6 | 53.9 |
| <i>u</i> <sub>1068</sub> | Si(63)...H(70)   | 445.4(60)  | 50.3(fixed)                            | — | -1.1 | 50.3 |

|                          |                  |            |                                        |   |      |      |
|--------------------------|------------------|------------|----------------------------------------|---|------|------|
| <i>u</i> <sub>1093</sub> | C(55)...H(62)    | 445.6(67)  | 29.4(fixed)                            | — | -5.2 | 29.4 |
| <i>u</i> <sub>1003</sub> | Si(1)...H(40)    | 445.6(12)  | 16.4(fixed)                            | — | -5.6 | 16.4 |
| <i>u</i> <sub>987</sub>  | Si(63)...H(100)  | 445.7(13)  | 15.6(fixed)                            | — | -4.1 | 15.6 |
| <i>u</i> <sub>1009</sub> | C(143)...H(176)  | 445.7(103) | 56.1(fixed)                            | — | 2.8  | 56.1 |
| <i>u</i> <sub>1052</sub> | H(25)...C(56)    | 446.0(69)  | 48.2(fixed)                            | — | -4.4 | 48.2 |
| <i>u</i> <sub>1057</sub> | Si(65)...H(92)   | 446.1(83)  | 53.5(fixed)                            | — | -2.1 | 53.5 |
| <i>u</i> <sub>1209</sub> | H(76)...C(89)    | 446.1(117) | 66.4(fixed)                            | — | -5.0 | 66.4 |
| <i>u</i> <sub>935</sub>  | Si(1)...H(16)    | 446.4(56)  | 53.0(fixed)                            | — | 0.1  | 53.0 |
| <i>u</i> <sub>966</sub>  | C(147)...H(184)  | 446.8(69)  | 46.9(fixed)                            | — | -3.2 | 46.9 |
| <i>u</i> <sub>920</sub>  | H(10)...H(25)    | 446.9(135) | 74.5(fixed)                            | — | 7.9  | 74.5 |
| <i>u</i> <sub>991</sub>  | Si(1)...H(46)    | 446.9(12)  | 15.4(fixed)                            | — | -4.3 | 15.4 |
| <i>u</i> <sub>1018</sub> | Si(1)...H(52)    | 447.2(7)   | 16.2(fixed)                            | — | -6.1 | 16.2 |
| <i>u</i> <sub>787</sub>  | C(81)...C(113)   | 447.7(109) | 56.9(tied to <i>u</i> <sub>874</sub> ) | — | 7.0  | 52.1 |
| <i>u</i> <sub>1175</sub> | H(132)...C(179)  | 448.2(88)  | 59.8(fixed)                            | — | -3.9 | 59.8 |
| <i>u</i> <sub>938</sub>  | H(21)...H(61)    | 448.4(47)  | 49.2(fixed)                            | — | 3.9  | 49.2 |
| <i>u</i> <sub>1084</sub> | H(71)...C(105)   | 448.6(134) | 47.1(fixed)                            | — | 8.4  | 47.1 |
| <i>u</i> <sub>1002</sub> | Si(125)...H(170) | 448.6(12)  | 15.8(fixed)                            | — | -4.6 | 15.8 |
| <i>u</i> <sub>1029</sub> | C(139)...H(164)  | 449.0(163) | 39.4(fixed)                            | — | 8.0  | 39.4 |
| <i>u</i> <sub>1179</sub> | H(13)...H(29)    | 449.2(139) | 77.5(fixed)                            | — | 9.0  | 77.5 |
| <i>u</i> <sub>1007</sub> | Si(63)...H(108)  | 449.3(12)  | 15.9(fixed)                            | — | -5.1 | 15.9 |
| <i>u</i> <sub>1019</sub> | Si(63)...H(94)   | 449.3(13)  | 15.0(fixed)                            | — | -4.4 | 15.0 |
| <i>u</i> <sub>975</sub>  | H(149)...C(180)  | 449.4(68)  | 42.9(fixed)                            | — | -2.7 | 42.9 |
| <i>u</i> <sub>1045</sub> | H(16)...H(59)    | 449.5(100) | 68.9(fixed)                            | — | 0.0  | 68.9 |
| <i>u</i> <sub>1102</sub> | H(9)...C(43)     | 449.5(111) | 74.2(fixed)                            | — | 2.8  | 74.2 |
| <i>u</i> <sub>779</sub>  | H(16)...H(44)    | 450.1(103) | 61.3(fixed)                            | — | 12.0 | 61.3 |
| <i>u</i> <sub>1126</sub> | H(137)...H(153)  | 450.1(138) | 56.6(fixed)                            | — | 8.1  | 56.6 |
| <i>u</i> <sub>998</sub>  | C(81)...H(124)   | 450.8(63)  | 47.2(fixed)                            | — | -3.4 | 47.2 |
| <i>u</i> <sub>1089</sub> | Si(3)...C(27)    | 451.2(60)  | 46.0(tied to <i>u</i> <sub>874</sub> ) | — | -1.8 | 42.1 |
| <i>u</i> <sub>1095</sub> | Si(128)...H(169) | 451.5(118) | 54.0(fixed)                            | — | -0.8 | 54.0 |
| <i>u</i> <sub>973</sub>  | H(22)...H(60)    | 452.0(45)  | 49.0(fixed)                            | — | 1.6  | 49.0 |
| <i>u</i> <sub>965</sub>  | H(20)...H(62)    | 452.1(88)  | 65.8(fixed)                            | — | -5.6 | 65.8 |
| <i>u</i> <sub>981</sub>  | H(145)...H(185)  | 452.9(46)  | 51.4(fixed)                            | — | -3.0 | 51.4 |
| <i>u</i> <sub>1025</sub> | Si(125)...H(164) | 453.3(11)  | 14.9(fixed)                            | — | -4.1 | 14.9 |
| <i>u</i> <sub>954</sub>  | H(8)...H(26)     | 453.3(124) | 73.8(fixed)                            | — | 10.5 | 73.8 |
| <i>u</i> <sub>1132</sub> | H(57)...H(62)    | 453.5(67)  | 49.9(fixed)                            | — | -5.0 | 49.9 |
| <i>u</i> <sub>1078</sub> | C(69)...H(108)   | 453.5(129) | 48.4(fixed)                            | — | 9.8  | 48.4 |
| <i>u</i> <sub>946</sub>  | C(73)...H(123)   | 453.8(53)  | 46.2(fixed)                            | — | -3.0 | 46.2 |
| <i>u</i> <sub>1105</sub> | Si(3)...H(58)    | 455.5(61)  | 41.4(fixed)                            | — | -2.1 | 41.4 |
| <i>u</i> <sub>999</sub>  | H(145)...H(177)  | 455.6(102) | 76.4(fixed)                            | — | 3.1  | 76.4 |
| <i>u</i> <sub>1055</sub> | H(26)...H(62)    | 456.1(61)  | 59.1(fixed)                            | — | 0.1  | 59.1 |
| <i>u</i> <sub>963</sub>  | Si(125)...H(140) | 456.2(54)  | 44.5(fixed)                            | — | 1.0  | 44.5 |
| <i>u</i> <sub>1041</sub> | H(18)...C(43)    | 456.3(80)  | 63.4(fixed)                            | — | 6.2  | 63.4 |
| <i>u</i> <sub>943</sub>  | Si(63)...H(92)   | 456.8(63)  | 43.4(fixed)                            | — | 6.8  | 43.4 |
| <i>u</i> <sub>1040</sub> | H(134)...H(152)  | 457.0(120) | 66.9(fixed)                            | — | -1.4 | 66.9 |
| <i>u</i> <sub>1047</sub> | Si(63)...H(83)   | 457.5(62)  | 45.4(fixed)                            | — | 0.0  | 45.4 |
| <i>u</i> <sub>1198</sub> | C(151)...H(182)  | 457.7(63)  | 67.5(fixed)                            | — | -5.2 | 67.5 |

|                          |                   |            |                                         |   |      |      |
|--------------------------|-------------------|------------|-----------------------------------------|---|------|------|
| <i>u</i> <sub>1073</sub> | H(24)...H(61)     | 458.2(61)  | 59.9(fixed)                             | — | 2.4  | 59.9 |
| <i>u</i> <sub>1004</sub> | Si(63)...C(77)    | 458.7(41)  | 27.4(tied to <i>u</i> <sub>874</sub> )  | — | 1.1  | 25.1 |
| <i>u</i> <sub>1049</sub> | Si(128)...Si(130) | 458.7(39)  | 19.2(tied to <i>u</i> <sub>1079</sub> ) | — | 0.9  | 22.5 |
| <i>u</i> <sub>1038</sub> | H(144)...H(186)   | 458.9(85)  | 61.1(fixed)                             | — | -6.8 | 61.1 |
| <i>u</i> <sub>982</sub>  | H(70)...H(90)     | 459.1(106) | 70.2(fixed)                             | — | 10.4 | 70.2 |
| <i>u</i> <sub>1137</sub> | H(133)...H(181)   | 459.4(83)  | 80.7(fixed)                             | — | -1.8 | 80.7 |
| <i>u</i> <sub>1021</sub> | H(82)...C(118)    | 459.7(63)  | 46.1(fixed)                             | — | -2.9 | 46.1 |
| <i>u</i> <sub>1119</sub> | Si(128)...C(179)  | 460.1(29)  | 25.1(tied to <i>u</i> <sub>1079</sub> ) | — | -1.5 | 29.4 |
| <i>u</i> <sub>895</sub>  | H(10)...H(53)     | 460.2(137) | 84.3(fixed)                             | — | 8.6  | 84.3 |
| <i>u</i> <sub>1011</sub> | H(146)...H(184)   | 460.2(45)  | 54.9(fixed)                             | — | 0.1  | 54.9 |
| <i>u</i> <sub>1060</sub> | C(69)...H(120)    | 460.3(124) | 58.5(fixed)                             | — | -2.6 | 58.5 |
| <i>u</i> <sub>909</sub>  | H(91)...H(116)    | 460.6(290) | 69.0(fixed)                             | — | 6.3  | 69.0 |
| <i>u</i> <sub>1111</sub> | C(139)...H(186)   | 460.9(48)  | 45.8(fixed)                             | — | -3.1 | 45.8 |
| <i>u</i> <sub>988</sub>  | Si(1)...C(27)     | 460.9(41)  | 35.4(tied to <i>u</i> <sub>874</sub> )  | — | 2.0  | 32.3 |
| <i>u</i> <sub>1077</sub> | H(136)...C(147)   | 461.1(79)  | 46.2(fixed)                             | — | -2.3 | 46.2 |
| <i>u</i> <sub>1030</sub> | H(72)...H(92)     | 461.7(115) | 91.6(fixed)                             | — | 4.6  | 91.6 |
| <i>u</i> <sub>926</sub>  | C(7)...C(51)      | 462.6(110) | 80.9(tied to <i>u</i> <sub>874</sub> )  | — | 5.8  | 74.0 |
| <i>u</i> <sub>1075</sub> | H(12)...C(23)     | 462.7(74)  | 43.2(fixed)                             | — | 4.2  | 43.2 |
| <i>u</i> <sub>1094</sub> | H(80)...H(124)    | 463.1(52)  | 52.5(fixed)                             | — | -4.5 | 52.5 |
| <i>u</i> <sub>1070</sub> | Si(125)...C(143)  | 463.3(45)  | 18.6(tied to <i>u</i> <sub>1079</sub> ) | — | -0.4 | 21.8 |
| <i>u</i> <sub>1174</sub> | H(72)...H(110)    | 463.3(127) | 85.3(fixed)                             | — | 22.6 | 85.3 |
| <i>u</i> <sub>1039</sub> | Si(127)...C(163)  | 463.6(102) | 31.7(tied to <i>u</i> <sub>874</sub> )  | — | 5.2  | 29.0 |
| <i>u</i> <sub>1031</sub> | H(148)...H(185)   | 463.6(57)  | 55.8(fixed)                             | — | -2.1 | 55.8 |
| <i>u</i> <sub>1054</sub> | H(18)...H(61)     | 463.6(49)  | 56.6(fixed)                             | — | -3.0 | 56.6 |
| <i>u</i> <sub>859</sub>  | H(138)...H(166)   | 463.7(128) | 80.0(fixed)                             | — | 24.9 | 80.0 |
| <i>u</i> <sub>1100</sub> | Si(4)...H(14)     | 463.9(63)  | 47.4(fixed)                             | — | -2.6 | 47.4 |
| <i>u</i> <sub>1051</sub> | Si(4)...C(31)     | 464.1(56)  | 48.0(tied to <i>u</i> <sub>874</sub> )  | — | 2.3  | 43.9 |
| <i>u</i> <sub>1099</sub> | C(73)...H(88)     | 464.9(83)  | 41.1(fixed)                             | — | 0.6  | 41.1 |
| <i>u</i> <sub>1177</sub> | Si(128)...H(138)  | 465.1(62)  | 42.2(fixed)                             | — | -3.3 | 42.2 |
| <i>u</i> <sub>1133</sub> | C(15)...H(59)     | 465.7(80)  | 43.3(fixed)                             | — | -1.9 | 43.3 |
| <i>u</i> <sub>1153</sub> | Si(66)...C(93)    | 465.8(75)  | 31.2(tied to <i>u</i> <sub>1079</sub> ) | — | 4.6  | 36.5 |
| <i>u</i> <sub>1001</sub> | H(75)...C(118)    | 465.9(55)  | 47.0(fixed)                             | — | -3.4 | 47.0 |
| <i>u</i> <sub>1231</sub> | H(79)...H(122)    | 466.3(52)  | 58.1(fixed)                             | — | -5.5 | 58.1 |
| <i>u</i> <sub>1085</sub> | C(131)...H(152)   | 466.4(105) | 44.1(fixed)                             | — | -1.5 | 44.1 |
| <i>u</i> <sub>1142</sub> | H(141)...C(180)   | 466.6(45)  | 40.0(fixed)                             | — | -3.0 | 40.0 |
| <i>u</i> <sub>1016</sub> | H(150)...H(186)   | 466.6(59)  | 56.7(fixed)                             | — | 1.1  | 56.7 |
| <i>u</i> <sub>1090</sub> | Si(65)...H(86)    | 467.2(70)  | 49.8(fixed)                             | — | -2.2 | 49.8 |
| <i>u</i> <sub>888</sub>  | H(9)...H(54)      | 467.4(158) | 89.7(fixed)                             | — | 12.0 | 89.7 |
| <i>u</i> <sub>1171</sub> | Si(127)...H(154)  | 467.4(83)  | 40.1(fixed)                             | — | -2.3 | 40.1 |
| <i>u</i> <sub>997</sub>  | H(8)...C(51)      | 467.5(128) | 98.4(fixed)                             | — | 5.2  | 98.4 |
| <i>u</i> <sub>1092</sub> | Si(1)...C(19)     | 467.6(44)  | 24.8(tied to <i>u</i> <sub>1079</sub> ) | — | 0.3  | 29.0 |
| <i>u</i> <sub>1115</sub> | H(80)...C(118)    | 467.9(30)  | 34.3(fixed)                             | — | -5.1 | 34.3 |
| <i>u</i> <sub>1081</sub> | H(80)...C(117)    | 468.0(83)  | 38.7(fixed)                             | — | -0.5 | 38.7 |
| <i>u</i> <sub>972</sub>  | H(74)...H(124)    | 468.4(61)  | 50.0(fixed)                             | — | 0.5  | 50.0 |
| <i>u</i> <sub>1116</sub> | Si(125)...C(131)  | 468.7(38)  | 35.8(tied to <i>u</i> <sub>874</sub> )  | — | -1.2 | 32.7 |
| <i>u</i> <sub>1104</sub> | Si(1)...C(7)      | 469.7(38)  | 31.0(tied to <i>u</i> <sub>874</sub> )  | — | -0.7 | 28.4 |

|                          |                  |            |                                         |          |      |      |
|--------------------------|------------------|------------|-----------------------------------------|----------|------|------|
| <i>u</i> <sub>1140</sub> | C(77)...H(122)   | 469.8(32)  | 34.8(fixed)                             | —        | -3.8 | 34.8 |
| <i>u</i> <sub>1046</sub> | C(139)...H(181)  | 470.0(83)  | 63.2(fixed)                             | —        | -4.4 | 63.2 |
| <i>u</i> <sub>1082</sub> | Si(125)...H(153) | 470.5(72)  | 50.1(fixed)                             | —        | -1.4 | 50.1 |
| <i>u</i> <sub>1189</sub> | H(70)...C(117)   | 471.2(110) | 67.2(fixed)                             | —        | -5.4 | 67.2 |
| <i>u</i> <sub>1076</sub> | H(16)...H(60)    | 471.3(45)  | 57.0(fixed)                             | —        | 1.2  | 57.0 |
| <i>u</i> <sub>1176</sub> | C(135)...H(150)  | 471.7(73)  | 41.2(fixed)                             | —        | -4.3 | 41.2 |
| <i>u</i> <sub>1110</sub> | H(88)...C(118)   | 472.0(36)  | 32.2(fixed)                             | —        | -7.0 | 32.2 |
| <i>u</i> <sub>1131</sub> | Si(65)...C(105)  | 473.0(76)  | 28.7(tied to <i>u</i> <sub>1079</sub> ) | —        | 3.6  | 33.6 |
| <i>u</i> <sub>931</sub>  | C(89)...C(113)   | 473.3(197) | 60.9(tied to <i>u</i> <sub>874</sub> )  | —        | 3.1  | 55.7 |
| <i>u</i> <sub>1062</sub> | Si(66)...C(69)   | 473.3(51)  | 37.2(tied to <i>u</i> <sub>874</sub> )  | —        | -0.7 | 34.0 |
| <i>u</i> <sub>1138</sub> | C(11)...H(26)    | 473.4(69)  | 40.9(fixed)                             | —        | 3.0  | 40.9 |
| <i>u</i> <sub>1331</sub> | H(9)...H(45)     | 474.5(163) | 89.9(fixed)                             | —        | -5.4 | 89.9 |
| <i>u</i> <sub>907</sub>  | Si(3)...H(54)    | 474.6(112) | 67.1(fixed)                             | —        | 13.5 | 67.1 |
| <i>u</i> <sub>1069</sub> | H(83)...H(115)   | 474.9(118) | 93.9(fixed)                             | —        | 2.1  | 93.9 |
| <i>u</i> <sub>1169</sub> | H(10)...H(57)    | 475.2(85)  | 54.2(fixed)                             | —        | 8.7  | 54.2 |
| <i>u</i> <sub>1015</sub> | H(76)...H(122)   | 475.3(58)  | 51.8(fixed)                             | —        | 2.8  | 51.8 |
| <i>u</i> <sub>1172</sub> | H(133)...C(151)  | 475.6(111) | 37.4(fixed)                             | —        | -2.3 | 37.4 |
| <i>u</i> <sub>1123</sub> | C(85)...H(123)   | 475.6(39)  | 32.9(fixed)                             | —        | -3.6 | 32.9 |
| <i>u</i> <sub>1165</sub> | C(7)...H(46)     | 476.0(105) | 60.2(fixed)                             | —        | 2.8  | 60.2 |
| <i>u</i> <sub>1079</sub> | Si(3)...Si(6)    | 476.2(22)  | 20.6(14)                                | 24.1(24) | 0.2  | 24.1 |
| <i>u</i> <sub>1292</sub> | C(73)...H(92)    | 476.5(124) | 64.0(fixed)                             | —        | -6.2 | 64.0 |
| <i>u</i> <sub>1088</sub> | C(131)...H(148)  | 476.6(121) | 50.5(fixed)                             | —        | -4.8 | 50.5 |
| <i>u</i> <sub>1103</sub> | H(12)...C(56)    | 477.4(38)  | 37.3(fixed)                             | —        | -7.6 | 37.3 |
| <i>u</i> <sub>1267</sub> | H(146)...H(170)  | 478.3(185) | 70.9(fixed)                             | —        | -1.2 | 70.9 |
| <i>u</i> <sub>1152</sub> | H(13)...H(17)    | 478.3(15)  | 16.8(fixed)                             | —        | -8.5 | 16.8 |
| <i>u</i> <sub>1194</sub> | H(18)...C(55)    | 478.4(72)  | 41.5(fixed)                             | —        | -5.3 | 41.5 |
| <i>u</i> <sub>1183</sub> | H(87)...H(123)   | 478.8(67)  | 61.9(fixed)                             | —        | -4.3 | 61.9 |
| <i>u</i> <sub>1113</sub> | H(88)...H(122)   | 478.9(65)  | 47.6(fixed)                             | —        | -6.2 | 47.6 |
| <i>u</i> <sub>1157</sub> | H(24)...H(30)    | 478.9(13)  | 17.0(fixed)                             | —        | -9.1 | 17.0 |
| <i>u</i> <sub>1146</sub> | H(132)...H(140)  | 479.8(10)  | 16.9(fixed)                             | —        | -7.6 | 16.9 |
| <i>u</i> <sub>1215</sub> | H(8)...C(43)     | 479.8(127) | 50.7(fixed)                             | —        | -3.5 | 50.7 |
| <i>u</i> <sub>1164</sub> | H(148)...H(154)  | 479.9(14)  | 16.7(fixed)                             | —        | -8.3 | 16.7 |
| <i>u</i> <sub>1154</sub> | H(137)...H(141)  | 480.0(14)  | 16.4(fixed)                             | —        | -7.6 | 16.4 |
| <i>u</i> <sub>1148</sub> | H(144)...H(149)  | 480.1(10)  | 16.9(fixed)                             | —        | -8.0 | 16.9 |
| <i>u</i> <sub>1150</sub> | H(75)...H(79)    | 480.2(15)  | 16.6(fixed)                             | —        | -7.3 | 16.6 |
| <i>u</i> <sub>1050</sub> | H(82)...H(106)   | 480.3(302) | 58.6(fixed)                             | —        | 10.3 | 58.6 |
| <i>u</i> <sub>1160</sub> | H(86)...H(92)    | 480.5(13)  | 16.9(fixed)                             | —        | -8.2 | 16.9 |
| <i>u</i> <sub>1149</sub> | H(20)...H(25)    | 480.7(10)  | 17.0(fixed)                             | —        | -8.1 | 17.0 |
| <i>u</i> <sub>1202</sub> | Si(1)...H(21)    | 480.8(64)  | 46.9(fixed)                             | —        | -2.1 | 46.9 |
| <i>u</i> <sub>1156</sub> | H(82)...H(87)    | 480.8(10)  | 16.7(fixed)                             | —        | -8.4 | 16.7 |
| <i>u</i> <sub>1124</sub> | C(135)...H(184)  | 480.8(39)  | 34.8(fixed)                             | —        | -7.3 | 34.8 |
| <i>u</i> <sub>1112</sub> | C(11)...H(60)    | 480.9(40)  | 35.7(fixed)                             | —        | -5.4 | 35.7 |
| <i>u</i> <sub>1087</sub> | H(134)...C(147)  | 480.9(114) | 53.7(fixed)                             | —        | -4.6 | 53.7 |
| <i>u</i> <sub>1064</sub> | H(140)...C(179)  | 481.0(83)  | 65.4(fixed)                             | —        | -2.8 | 65.4 |
| <i>u</i> <sub>1129</sub> | H(136)...C(180)  | 481.1(37)  | 33.9(fixed)                             | —        | -5.7 | 33.9 |
| <i>u</i> <sub>1071</sub> | H(84)...H(122)   | 481.2(54)  | 54.6(fixed)                             | —        | -2.7 | 54.6 |



|                          |                  |            |                                         |   |      |      |
|--------------------------|------------------|------------|-----------------------------------------|---|------|------|
| <i>u</i> <sub>1058</sub> | Si(1)...H(29)    | 481.7(70)  | 49.7(fixed)                             | — | 0.7  | 49.7 |
| <i>u</i> <sub>1158</sub> | H(8)...H(16)     | 481.8(10)  | 17.4(fixed)                             | — | -8.9 | 17.4 |
| <i>u</i> <sub>1168</sub> | H(10)...H(14)    | 481.8(10)  | 17.1(fixed)                             | — | -9.0 | 17.1 |
| <i>u</i> <sub>1101</sub> | H(22)...H(62)    | 482.0(60)  | 55.7(fixed)                             | — | -3.1 | 55.7 |
| <i>u</i> <sub>1161</sub> | H(21)...H(29)    | 482.0(9)   | 17.0(fixed)                             | — | -8.4 | 17.0 |
| <i>u</i> <sub>1234</sub> | H(133)...C(179)  | 482.0(72)  | 68.5(fixed)                             | — | -3.9 | 68.5 |
| <i>u</i> <sub>1151</sub> | H(83)...H(91)    | 482.2(9)   | 17.0(fixed)                             | — | -8.2 | 17.0 |
| <i>u</i> <sub>1117</sub> | C(7)...H(24)     | 482.4(118) | 68.7(fixed)                             | — | -4.1 | 68.7 |
| <i>u</i> <sub>1159</sub> | H(72)...H(76)    | 482.5(10)  | 16.3(fixed)                             | — | -7.4 | 16.3 |
| <i>u</i> <sub>1162</sub> | H(145)...H(153)  | 482.9(9)   | 16.8(fixed)                             | — | -8.1 | 16.8 |
| <i>u</i> <sub>1166</sub> | H(134)...H(138)  | 482.9(10)  | 16.9(fixed)                             | — | -8.3 | 16.9 |
| <i>u</i> <sub>1181</sub> | Si(125)...H(145) | 483.0(65)  | 44.7(fixed)                             | — | -1.7 | 44.7 |
| <i>u</i> <sub>1320</sub> | C(73)...H(90)    | 483.1(101) | 60.7(fixed)                             | — | -3.1 | 60.7 |
| <i>u</i> <sub>1163</sub> | H(70)...H(78)    | 483.2(10)  | 16.5(fixed)                             | — | -7.3 | 16.5 |
| <i>u</i> <sub>1218</sub> | H(17)...H(62)    | 483.5(57)  | 50.7(fixed)                             | — | -7.3 | 50.7 |
| <i>u</i> <sub>1120</sub> | H(12)...H(61)    | 483.8(58)  | 55.5(fixed)                             | — | -6.9 | 55.5 |
| <i>u</i> <sub>795</sub>  | H(28)...H(53)    | 484.1(164) | 79.3(fixed)                             | — | 30.8 | 79.3 |
| <i>u</i> <sub>1109</sub> | Si(63)...C(89)   | 484.4(45)  | 23.9(tied to <i>u</i> <sub>1079</sub> ) | — | -0.3 | 28.0 |
| <i>u</i> <sub>1155</sub> | H(74)...C(85)    | 484.5(93)  | 39.0(fixed)                             | — | 1.7  | 39.0 |
| <i>u</i> <sub>1136</sub> | H(136)...H(185)  | 485.0(58)  | 63.1(fixed)                             | — | -5.0 | 63.1 |
| <i>u</i> <sub>1125</sub> | H(22)...C(56)    | 485.2(34)  | 35.0(fixed)                             | — | -3.8 | 35.0 |
| <i>u</i> <sub>1135</sub> | C(77)...H(121)   | 485.5(89)  | 39.8(fixed)                             | — | 1.0  | 39.8 |
| <i>u</i> <sub>1258</sub> | H(13)...C(27)    | 485.6(102) | 56.2(fixed)                             | — | 3.1  | 56.2 |
| <i>u</i> <sub>1106</sub> | H(72)...C(89)    | 486.2(92)  | 72.1(fixed)                             | — | -0.5 | 72.1 |
| <i>u</i> <sub>1034</sub> | Si(66)...C(113)  | 487.0(75)  | 35.6(tied to <i>u</i> <sub>1079</sub> ) | — | 2.4  | 41.7 |
| <i>u</i> <sub>1080</sub> | H(16)...C(43)    | 487.3(94)  | 60.7(fixed)                             | — | 2.3  | 60.7 |
| <i>u</i> <sub>1074</sub> | Si(66)...Si(68)  | 487.5(44)  | 19.0(tied to <i>u</i> <sub>1079</sub> ) | — | 0.2  | 22.2 |
| <i>u</i> <sub>1243</sub> | H(137)...C(151)  | 487.6(103) | 46.2(fixed)                             | — | 3.5  | 46.2 |
| <i>u</i> <sub>1098</sub> | H(83)...H(123)   | 488.0(58)  | 57.3(fixed)                             | — | 0.4  | 57.3 |
| <i>u</i> <sub>1241</sub> | C(135)...H(153)  | 488.9(115) | 43.3(fixed)                             | — | 3.7  | 43.3 |
| <i>u</i> <sub>1262</sub> | Si(128)...H(182) | 488.9(46)  | 53.7(fixed)                             | — | -5.0 | 53.7 |
| <i>u</i> <sub>1357</sub> | H(145)...H(170)  | 489.1(234) | 67.3(fixed)                             | — | -6.4 | 67.3 |
| <i>u</i> <sub>1128</sub> | H(146)...H(186)  | 489.5(58)  | 64.2(fixed)                             | — | -4.3 | 64.2 |
| <i>u</i> <sub>1260</sub> | Si(3)...H(30)    | 489.7(76)  | 51.4(fixed)                             | — | -4.9 | 51.4 |
| <i>u</i> <sub>1296</sub> | C(7)...H(28)     | 490.1(99)  | 79.8(fixed)                             | — | -4.8 | 79.8 |
| <i>u</i> <sub>1280</sub> | C(117)...H(124)  | 490.1(67)  | 31.3(fixed)                             | — | -4.7 | 31.3 |
| <i>u</i> <sub>1298</sub> | H(10)...H(28)    | 490.6(114) | 95.6(fixed)                             | — | -3.3 | 95.6 |
| <i>u</i> <sub>1118</sub> | H(137)...H(184)  | 490.8(66)  | 59.6(fixed)                             | — | -5.9 | 59.6 |
| <i>u</i> <sub>1182</sub> | H(13)...H(60)    | 490.9(66)  | 57.1(fixed)                             | — | -5.4 | 57.1 |
| <i>u</i> <sub>1083</sub> | C(143)...H(177)  | 491.1(135) | 46.9(fixed)                             | — | -0.3 | 46.9 |
| <i>u</i> <sub>1324</sub> | C(11)...H(29)    | 491.4(115) | 70.7(fixed)                             | — | 1.5  | 70.7 |
| <i>u</i> <sub>1144</sub> | H(146)...C(180)  | 491.9(33)  | 36.0(fixed)                             | — | -6.0 | 36.0 |
| <i>u</i> <sub>1143</sub> | C(19)...H(61)    | 492.6(39)  | 34.3(fixed)                             | — | -3.6 | 34.3 |
| <i>u</i> <sub>1329</sub> | C(131)...H(183)  | 492.8(80)  | 62.7(fixed)                             | — | -8.7 | 62.7 |
| <i>u</i> <sub>1147</sub> | Si(128)...C(175) | 493.4(100) | 27.0(tied to <i>u</i> <sub>1079</sub> ) | — | 1.4  | 31.6 |
| <i>u</i> <sub>1221</sub> | C(179)...C(180)  | 493.4(41)  | 15.8(tied to <i>u</i> <sub>1079</sub> ) | — | -3.4 | 18.5 |

|                          |                   |            |                                         |   |       |      |
|--------------------------|-------------------|------------|-----------------------------------------|---|-------|------|
| <i>u</i> <sub>1274</sub> | H(20)...H(53)     | 493.7(142) | 89.2(fixed)                             | — | 14.2  | 89.2 |
| <i>u</i> <sub>1107</sub> | Si(63)...H(78)    | 494.3(51)  | 46.2(fixed)                             | — | -1.0  | 46.2 |
| <i>u</i> <sub>1139</sub> | Si(4)...C(39)     | 494.5(61)  | 28.1(tied to <i>u</i> <sub>1079</sub> ) | — | 1.0   | 32.9 |
| <i>u</i> <sub>1184</sub> | C(143)...H(185)   | 494.7(38)  | 33.6(fixed)                             | — | -9.6  | 33.6 |
| <i>u</i> <sub>1048</sub> | Si(4)...H(53)     | 495.6(96)  | 61.1(fixed)                             | — | 9.0   | 61.1 |
| <i>u</i> <sub>1141</sub> | H(146)...C(175)   | 495.7(115) | 39.9(fixed)                             | — | 0.4   | 39.9 |
| <i>u</i> <sub>1091</sub> | H(84)...H(115)    | 496.0(97)  | 93.5(fixed)                             | — | 2.4   | 93.5 |
| <i>u</i> <sub>1185</sub> | H(133)...C(147)   | 496.0(113) | 53.3(fixed)                             | — | -4.0  | 53.3 |
| <i>u</i> <sub>1254</sub> | H(144)...H(181)   | 496.1(117) | 51.6(fixed)                             | — | 11.7  | 51.6 |
| <i>u</i> <sub>1127</sub> | C(135)...H(166)   | 496.8(117) | 65.6(fixed)                             | — | 13.5  | 65.6 |
| <i>u</i> <sub>1247</sub> | H(71)...C(117)    | 497.1(104) | 56.2(fixed)                             | — | -3.0  | 56.2 |
| <i>u</i> <sub>1253</sub> | C(7)...H(57)      | 497.2(73)  | 42.9(fixed)                             | — | 2.9   | 42.9 |
| <i>u</i> <sub>1232</sub> | H(26)...C(56)     | 497.3(43)  | 42.4(fixed)                             | — | -6.3  | 42.4 |
| <i>u</i> <sub>1196</sub> | C(139)...H(183)   | 498.0(78)  | 72.3(fixed)                             | — | -6.7  | 72.3 |
| <i>u</i> <sub>1187</sub> | C(131)...H(150)   | 498.0(107) | 56.9(fixed)                             | — | -4.7  | 56.9 |
| <i>u</i> <sub>1286</sub> | H(14)...H(26)     | 498.0(92)  | 65.3(fixed)                             | — | -2.6  | 65.3 |
| <i>u</i> <sub>1374</sub> | H(119)...H(122)   | 498.5(86)  | 37.5(fixed)                             | — | -6.1  | 37.5 |
| <i>u</i> <sub>1275</sub> | H(25)...H(60)     | 498.7(77)  | 53.8(fixed)                             | — | -10.0 | 53.8 |
| <i>u</i> <sub>1259</sub> | Si(127)...H(183)  | 498.8(49)  | 47.2(fixed)                             | — | -9.9  | 47.2 |
| <i>u</i> <sub>1222</sub> | Si(127)...H(150)  | 499.0(52)  | 30.9(fixed)                             | — | -6.8  | 30.9 |
| <i>u</i> <sub>1066</sub> | H(70)...H(87)     | 499.2(131) | 77.9(fixed)                             | — | 9.6   | 77.9 |
| <i>u</i> <sub>1240</sub> | Si(65)...H(121)   | 499.8(63)  | 28.6(fixed)                             | — | -4.0  | 28.6 |
| <i>u</i> <sub>1197</sub> | H(10)...C(23)     | 500.5(107) | 58.9(fixed)                             | — | -4.2  | 58.9 |
| <i>u</i> <sub>1255</sub> | H(140)...H(184)   | 500.5(45)  | 50.3(fixed)                             | — | -4.4  | 50.3 |
| <i>u</i> <sub>1300</sub> | H(72)...C(109)    | 500.5(90)  | 64.5(fixed)                             | — | 14.0  | 64.5 |
| <i>u</i> <sub>1291</sub> | H(9)...H(46)      | 500.7(113) | 85.0(fixed)                             | — | 0.8   | 85.0 |
| <i>u</i> <sub>1302</sub> | C(69)...H(121)    | 501.1(104) | 60.6(fixed)                             | — | -3.5  | 60.6 |
| <i>u</i> <sub>1246</sub> | C(23)...H(61)     | 501.3(48)  | 39.0(fixed)                             | — | -5.4  | 39.0 |
| <i>u</i> <sub>1372</sub> | H(9)...C(27)      | 501.6(106) | 74.4(fixed)                             | — | -6.4  | 74.4 |
| <i>u</i> <sub>1223</sub> | C(69)...C(118)    | 501.6(17)  | 12.5(tied to <i>u</i> <sub>1079</sub> ) | — | -4.0  | 14.7 |
| <i>u</i> <sub>1207</sub> | H(149)...H(184)   | 501.7(77)  | 51.1(fixed)                             | — | -8.3  | 51.1 |
| <i>u</i> <sub>1229</sub> | H(142)...H(185)   | 501.9(48)  | 52.8(fixed)                             | — | 1.6   | 52.8 |
| <i>u</i> <sub>1210</sub> | Si(128)...H(133)  | 502.0(61)  | 29.7(fixed)                             | — | -5.2  | 29.7 |
| <i>u</i> <sub>1219</sub> | H(18)...C(56)     | 502.0(31)  | 39.0(fixed)                             | — | -7.4  | 39.0 |
| <i>u</i> <sub>1186</sub> | C(15)...H(46)     | 502.2(83)  | 55.6(fixed)                             | — | 2.3   | 55.6 |
| <i>u</i> <sub>1282</sub> | H(75)...H(106)    | 502.4(93)  | 76.1(fixed)                             | — | 15.5  | 76.1 |
| <i>u</i> <sub>1383</sub> | H(138)...H(150)   | 502.5(92)  | 58.5(fixed)                             | — | -10.7 | 58.5 |
| <i>u</i> <sub>1053</sub> | H(84)...C(113)    | 502.6(106) | 65.8(fixed)                             | — | 4.8   | 65.8 |
| <i>u</i> <sub>1130</sub> | H(83)...C(113)    | 503.1(160) | 59.6(fixed)                             | — | 0.4   | 59.6 |
| <i>u</i> <sub>1201</sub> | C(147)...H(185)   | 503.1(47)  | 37.2(fixed)                             | — | -8.9  | 37.2 |
| <i>u</i> <sub>1216</sub> | C(89)...C(118)    | 503.1(22)  | 12.9(tied to <i>u</i> <sub>1079</sub> ) | — | -3.7  | 15.1 |
| <i>u</i> <sub>1382</sub> | H(78)...H(87)     | 503.2(66)  | 66.5(fixed)                             | — | 6.0   | 66.5 |
| <i>u</i> <sub>1503</sub> | H(76)...H(90)     | 503.3(121) | 76.4(fixed)                             | — | -8.1  | 76.4 |
| <i>u</i> <sub>1386</sub> | H(74)...C(89)     | 503.3(108) | 58.4(fixed)                             | — | -3.7  | 58.4 |
| <i>u</i> <sub>1214</sub> | Si(127)...Si(129) | 503.4(68)  | 17.9(tied to <i>u</i> <sub>1079</sub> ) | — | -0.1  | 21.0 |
| <i>u</i> <sub>1195</sub> | H(142)...C(179)   | 504.3(68)  | 58.7(fixed)                             | — | -2.1  | 58.7 |

|                          |                  |            |                                         |   |       |       |
|--------------------------|------------------|------------|-----------------------------------------|---|-------|-------|
| <i>u</i> <sub>1199</sub> | H(150)...C(180)  | 504.4(42)  | 35.7(fixed)                             | — | -7.2  | 35.7  |
| <i>u</i> <sub>1242</sub> | C(15)...H(60)    | 504.6(35)  | 35.9(fixed)                             | — | -5.9  | 35.9  |
| <i>u</i> <sub>1211</sub> | C(7)...C(56)     | 504.7(19)  | 12.7(tied to <i>u</i> <sub>1079</sub> ) | — | -3.3  | 14.8  |
| <i>u</i> <sub>1235</sub> | Si(4)...H(34)    | 504.9(80)  | 61.1(fixed)                             | — | -2.6  | 61.1  |
| <i>u</i> <sub>1334</sub> | H(153)...H(183)  | 505.4(107) | 74.8(fixed)                             | — | -7.1  | 74.8  |
| <i>u</i> <sub>1348</sub> | C(151)...H(183)  | 505.5(59)  | 58.0(fixed)                             | — | -7.3  | 58.0  |
| <i>u</i> <sub>1283</sub> | Si(125)...H(132) | 505.5(52)  | 40.7(fixed)                             | — | -3.3  | 40.7  |
| <i>u</i> <sub>1351</sub> | H(133)...H(154)  | 506.1(142) | 54.7(fixed)                             | — | -7.5  | 54.7  |
| <i>u</i> <sub>1338</sub> | H(18)...H(58)    | 506.5(82)  | 59.7(fixed)                             | — | -9.4  | 59.7  |
| <i>u</i> <sub>1268</sub> | C(179)...H(185)  | 506.6(49)  | 41.2(fixed)                             | — | -1.6  | 41.2  |
| <i>u</i> <sub>1134</sub> | Si(4)...C(51)    | 506.9(55)  | 32.0(tied to <i>u</i> <sub>1079</sub> ) | — | 7.1   | 37.5  |
| <i>u</i> <sub>1226</sub> | C(27)...C(56)    | 507.0(15)  | 12.9(tied to <i>u</i> <sub>1079</sub> ) | — | -4.5  | 15.1  |
| <i>u</i> <sub>1252</sub> | Si(3)...H(26)    | 507.3(48)  | 31.8(fixed)                             | — | -3.1  | 31.8  |
| <i>u</i> <sub>1213</sub> | C(131)...C(180)  | 507.3(20)  | 13.7(tied to <i>u</i> <sub>1079</sub> ) | — | -3.2  | 16.0  |
| <i>u</i> <sub>1188</sub> | H(74)...C(118)   | 507.3(40)  | 36.1(fixed)                             | — | -4.7  | 36.1  |
| <i>u</i> <sub>1227</sub> | H(82)...H(124)   | 507.4(71)  | 50.5(fixed)                             | — | -7.2  | 50.5  |
| <i>u</i> <sub>1059</sub> | C(27)...H(52)    | 507.5(93)  | 51.5(fixed)                             | — | 21.0  | 51.5  |
| <i>u</i> <sub>1257</sub> | Si(1)...H(8)     | 507.7(52)  | 44.0(fixed)                             | — | -3.0  | 44.0  |
| <i>u</i> <sub>1236</sub> | Si(63)...H(91)   | 508.2(66)  | 46.6(fixed)                             | — | -2.6  | 46.6  |
| <i>u</i> <sub>1228</sub> | C(151)...C(180)  | 508.5(15)  | 12.4(tied to <i>u</i> <sub>1079</sub> ) | — | -2.6  | 14.6  |
| <i>u</i> <sub>1192</sub> | Si(66)...H(115)  | 509.8(116) | 66.1(fixed)                             | — | -2.7  | 66.1  |
| <i>u</i> <sub>1279</sub> | Si(65)...Si(68)  | 510.1(46)  | 18.6(tied to <i>u</i> <sub>1079</sub> ) | — | -0.4  | 21.8  |
| <i>u</i> <sub>1167</sub> | Si(66)...C(105)  | 510.1(115) | 30.2(tied to <i>u</i> <sub>1079</sub> ) | — | 1.3   | 35.4  |
| <i>u</i> <sub>1281</sub> | Si(66)...H(74)   | 510.4(47)  | 28.4(fixed)                             | — | -3.5  | 28.4  |
| <i>u</i> <sub>1278</sub> | H(79)...H(104)   | 511.6(176) | 83.4(fixed)                             | — | 12.4  | 83.4  |
| <i>u</i> <sub>1326</sub> | Si(65)...H(90)   | 511.7(56)  | 35.7(fixed)                             | — | -5.8  | 35.7  |
| <i>u</i> <sub>1212</sub> | H(79)...H(107)   | 511.7(164) | 83.1(fixed)                             | — | 11.7  | 83.1  |
| <i>u</i> <sub>1297</sub> | C(69)...H(123)   | 511.9(32)  | 29.1(fixed)                             | — | -3.9  | 29.1  |
| <i>u</i> <sub>1272</sub> | H(182)...H(185)  | 512.0(59)  | 54.4(fixed)                             | — | 4.4   | 54.4  |
| <i>u</i> <sub>1472</sub> | H(145)...H(169)  | 512.1(254) | 53.0(fixed)                             | — | -11.2 | 53.0  |
| <i>u</i> <sub>1170</sub> | C(7)...H(52)     | 512.5(107) | 88.5(fixed)                             | — | 3.0   | 88.5  |
| <i>u</i> <sub>1339</sub> | H(141)...H(186)  | 512.6(52)  | 48.6(fixed)                             | — | -7.8  | 48.6  |
| <i>u</i> <sub>1309</sub> | H(71)...H(92)    | 512.9(127) | 79.6(fixed)                             | — | -2.7  | 79.6  |
| <i>u</i> <sub>1265</sub> | H(146)...H(176)  | 513.0(123) | 61.6(fixed)                             | — | -0.7  | 61.6  |
| <i>u</i> <sub>1468</sub> | H(20)...H(54)    | 513.5(189) | 82.5(fixed)                             | — | 1.3   | 82.5  |
| <i>u</i> <sub>1072</sub> | H(154)...H(178)  | 513.9(244) | 49.0(fixed)                             | — | 11.0  | 49.0  |
| <i>u</i> <sub>1233</sub> | Si(66)...H(72)   | 514.2(58)  | 50.1(fixed)                             | — | -3.9  | 50.1  |
| <i>u</i> <sub>1217</sub> | H(20)...H(61)    | 514.7(63)  | 54.4(fixed)                             | — | -4.4  | 54.4  |
| <i>u</i> <sub>1193</sub> | C(73)...H(122)   | 514.7(42)  | 35.8(fixed)                             | — | -4.0  | 35.8  |
| <i>u</i> <sub>1261</sub> | C(89)...H(124)   | 514.7(45)  | 30.0(fixed)                             | — | -3.5  | 30.0  |
| <i>u</i> <sub>1237</sub> | H(84)...C(118)   | 515.0(37)  | 38.8(fixed)                             | — | -7.0  | 38.8  |
| <i>u</i> <sub>1308</sub> | Si(128)...H(170) | 515.2(74)  | 37.0(fixed)                             | — | -2.7  | 37.0  |
| <i>u</i> <sub>1270</sub> | H(74)...H(86)    | 515.8(126) | 70.0(fixed)                             | — | -3.8  | 70.0  |
| <i>u</i> <sub>1266</sub> | H(71)...C(89)    | 515.8(92)  | 57.6(fixed)                             | — | -1.4  | 57.6  |
| <i>u</i> <sub>1277</sub> | H(144)...H(185)  | 516.4(61)  | 48.3(fixed)                             | — | -9.9  | 48.3  |
| <i>u</i> <sub>1208</sub> | H(8)...H(52)     | 516.7(129) | 110.8(fixed)                            | — | 1.6   | 110.8 |

|                          |                 |            |                                         |   |       |       |
|--------------------------|-----------------|------------|-----------------------------------------|---|-------|-------|
| <i>u</i> <sub>1350</sub> | H(72)...H(123)  | 516.9(47)  | 40.5(fixed)                             | — | -2.2  | 40.5  |
| <i>u</i> <sub>1224</sub> | H(75)...H(123)  | 517.0(57)  | 51.9(fixed)                             | — | -8.3  | 51.9  |
| <i>u</i> <sub>1251</sub> | H(9)...C(23)    | 517.0(106) | 63.6(fixed)                             | — | -1.3  | 63.6  |
| <i>u</i> <sub>1276</sub> | H(18)...H(62)   | 517.2(49)  | 53.3(fixed)                             | — | -7.1  | 53.3  |
| <i>u</i> <sub>1327</sub> | H(14)...H(57)   | 517.3(91)  | 57.3(fixed)                             | — | 6.0   | 57.3  |
| <i>u</i> <sub>1328</sub> | H(26)...H(60)   | 517.4(64)  | 58.5(fixed)                             | — | -7.9  | 58.5  |
| <i>u</i> <sub>1404</sub> | H(71)...H(108)  | 517.5(155) | 55.2(fixed)                             | — | 3.5   | 55.2  |
| <i>u</i> <sub>1294</sub> | H(91)...C(118)  | 517.5(42)  | 28.8(fixed)                             | — | -2.8  | 28.8  |
| <i>u</i> <sub>1434</sub> | H(119)...H(124) | 517.6(71)  | 41.9(fixed)                             | — | -5.5  | 41.9  |
| <i>u</i> <sub>1335</sub> | H(142)...H(164) | 518.6(188) | 45.4(fixed)                             | — | 3.2   | 45.4  |
| <i>u</i> <sub>1323</sub> | H(72)...C(118)  | 519.0(28)  | 27.4(fixed)                             | — | -4.0  | 27.4  |
| <i>u</i> <sub>1321</sub> | H(10)...C(55)   | 519.4(71)  | 46.4(fixed)                             | — | 3.8   | 46.4  |
| <i>u</i> <sub>1315</sub> | Si(4)...H(9)    | 519.5(56)  | 38.3(fixed)                             | — | -7.3  | 38.3  |
| <i>u</i> <sub>1200</sub> | C(69)...H(87)   | 519.7(106) | 57.1(fixed)                             | — | 5.5   | 57.1  |
| <i>u</i> <sub>1435</sub> | H(152)...C(179) | 520.1(49)  | 53.0(fixed)                             | — | -7.2  | 53.0  |
| <i>u</i> <sub>1299</sub> | H(91)...H(124)  | 520.7(73)  | 41.7(fixed)                             | — | -0.8  | 41.7  |
| <i>u</i> <sub>1250</sub> | C(81)...H(123)  | 520.7(43)  | 36.9(fixed)                             | — | -5.1  | 36.9  |
| <i>u</i> <sub>1546</sub> | H(76)...H(92)   | 521.1(123) | 67.3(fixed)                             | — | -12.2 | 67.3  |
| <i>u</i> <sub>1256</sub> | C(7)...H(62)    | 521.6(37)  | 30.4(fixed)                             | — | -2.3  | 30.4  |
| <i>u</i> <sub>1375</sub> | H(17)...H(60)   | 521.8(51)  | 49.1(fixed)                             | — | -6.3  | 49.1  |
| <i>u</i> <sub>1204</sub> | H(8)...H(53)    | 522.5(160) | 112.1(fixed)                            | — | -2.1  | 112.1 |
| <i>u</i> <sub>1203</sub> | C(81)...H(106)  | 522.9(253) | 50.3(fixed)                             | — | 6.3   | 50.3  |
| <i>u</i> <sub>1395</sub> | C(77)...H(87)   | 523.8(54)  | 48.5(fixed)                             | — | 4.6   | 48.5  |
| <i>u</i> <sub>1368</sub> | C(11)...H(57)   | 523.9(78)  | 45.0(fixed)                             | — | 2.4   | 45.0  |
| <i>u</i> <sub>1317</sub> | Si(1)...H(18)   | 524.2(39)  | 27.6(fixed)                             | — | -6.7  | 27.6  |
| <i>u</i> <sub>1248</sub> | C(131)...H(186) | 524.6(39)  | 32.0(fixed)                             | — | 0.0   | 32.0  |
| <i>u</i> <sub>1295</sub> | C(7)...H(26)    | 525.2(100) | 58.9(fixed)                             | — | -2.9  | 58.9  |
| <i>u</i> <sub>1290</sub> | H(150)...H(184) | 525.6(62)  | 55.5(fixed)                             | — | -7.6  | 55.5  |
| <i>u</i> <sub>1359</sub> | H(70)...H(120)  | 525.7(119) | 64.4(fixed)                             | — | -9.1  | 64.4  |
| <i>u</i> <sub>1271</sub> | H(78)...H(121)  | 526.2(102) | 67.6(fixed)                             | — | -4.6  | 67.6  |
| <i>u</i> <sub>1427</sub> | H(134)...H(165) | 526.4(156) | 64.9(fixed)                             | — | 8.5   | 64.9  |
| <i>u</i> <sub>1390</sub> | C(143)...H(181) | 526.5(81)  | 44.6(fixed)                             | — | 5.5   | 44.6  |
| <i>u</i> <sub>1264</sub> | H(132)...C(180) | 526.6(34)  | 30.3(fixed)                             | — | -0.7  | 30.3  |
| <i>u</i> <sub>1378</sub> | Si(3)...H(59)   | 526.7(52)  | 28.9(fixed)                             | — | -5.4  | 28.9  |
| <i>u</i> <sub>1344</sub> | C(179)...H(184) | 526.8(46)  | 27.5(fixed)                             | — | -2.7  | 27.5  |
| <i>u</i> <sub>1407</sub> | C(135)...C(151) | 526.8(85)  | 34.4(tied to <i>u</i> <sub>1288</sub> ) | — | -2.5  | 32.0  |
| <i>u</i> <sub>1284</sub> | C(27)...H(60)   | 526.9(32)  | 30.1(fixed)                             | — | -3.8  | 30.1  |
| <i>u</i> <sub>1336</sub> | H(18)...H(46)   | 527.0(88)  | 71.7(fixed)                             | — | 0.8   | 71.7  |
| <i>u</i> <sub>1539</sub> | H(8)...H(45)    | 527.2(154) | 60.0(fixed)                             | — | -13.7 | 60.0  |
| <i>u</i> <sub>1305</sub> | H(149)...H(185) | 527.3(66)  | 53.2(fixed)                             | — | -8.6  | 53.2  |
| <i>u</i> <sub>1108</sub> | H(17)...H(54)   | 527.4(139) | 63.0(fixed)                             | — | 12.6  | 63.0  |
| <i>u</i> <sub>1263</sub> | H(74)...H(123)  | 527.4(56)  | 50.4(fixed)                             | — | -5.8  | 50.4  |
| <i>u</i> <sub>1364</sub> | Si(4)...H(12)   | 528.0(46)  | 29.2(fixed)                             | — | -7.1  | 29.2  |
| <i>u</i> <sub>1389</sub> | H(25)...H(61)   | 528.3(67)  | 52.0(fixed)                             | — | -7.3  | 52.0  |
| <i>u</i> <sub>1369</sub> | C(139)...H(184) | 528.4(34)  | 33.3(fixed)                             | — | -8.2  | 33.3  |
| <i>u</i> <sub>1373</sub> | Si(63)...H(71)  | 528.4(39)  | 34.3(fixed)                             | — | -4.6  | 34.3  |

|                          |                  |            |                                         |          |       |      |
|--------------------------|------------------|------------|-----------------------------------------|----------|-------|------|
| <i>u</i> <sub>1457</sub> | C(11)...C(27)    | 529.0(83)  | 50.2(tied to <i>u</i> <sub>1288</sub> ) | —        | -5.3  | 46.7 |
| <i>u</i> <sub>1293</sub> | H(8)...C(56)     | 529.0(32)  | 28.4(fixed)                             | —        | -1.8  | 28.4 |
| <i>u</i> <sub>1285</sub> | C(69)...H(124)   | 529.0(30)  | 27.1(fixed)                             | —        | -4.4  | 27.1 |
| <i>u</i> <sub>1343</sub> | Si(128)...H(136) | 529.1(48)  | 31.7(fixed)                             | —        | -5.5  | 31.7 |
| <i>u</i> <sub>1288</sub> | Si(4)...Si(6)    | 529.1(30)  | 24.0(7)                                 | 22.4(22) | -0.5  | 22.4 |
| <i>u</i> <sub>1340</sub> | H(142)...C(180)  | 529.2(29)  | 30.9(fixed)                             | —        | -5.5  | 30.9 |
| <i>u</i> <sub>1311</sub> | H(84)...H(124)   | 529.5(56)  | 53.0(fixed)                             | —        | -8.0  | 53.0 |
| <i>u</i> <sub>1316</sub> | C(27)...H(62)    | 529.5(28)  | 28.3(fixed)                             | —        | -5.3  | 28.3 |
| <i>u</i> <sub>1362</sub> | Si(127)...H(152) | 529.7(62)  | 30.3(fixed)                             | —        | -6.0  | 30.3 |
| <i>u</i> <sub>1397</sub> | H(144)...C(179)  | 529.8(94)  | 39.6(fixed)                             | —        | 3.5   | 39.6 |
| <i>u</i> <sub>1325</sub> | H(154)...C(180)  | 530.1(30)  | 26.1(fixed)                             | —        | -1.6  | 26.1 |
| <i>u</i> <sub>1333</sub> | H(71)...H(120)   | 530.1(133) | 63.3(fixed)                             | —        | -4.9  | 63.3 |
| <i>u</i> <sub>1319</sub> | C(69)...H(90)    | 531.0(88)  | 57.6(fixed)                             | —        | -3.3  | 57.6 |
| <i>u</i> <sub>1239</sub> | C(89)...H(115)   | 531.2(239) | 64.0(fixed)                             | —        | -5.4  | 64.0 |
| <i>u</i> <sub>1353</sub> | Si(65)...H(88)   | 531.3(51)  | 28.7(fixed)                             | —        | -6.4  | 28.7 |
| <i>u</i> <sub>1310</sub> | C(7)...H(61)     | 531.3(25)  | 27.8(fixed)                             | —        | -3.5  | 27.8 |
| <i>u</i> <sub>1191</sub> | C(81)...H(114)   | 531.3(129) | 53.9(fixed)                             | —        | -0.2  | 53.9 |
| <i>u</i> <sub>1205</sub> | Si(3)...C(51)    | 531.5(79)  | 42.7(tied to <i>u</i> <sub>1079</sub> ) | —        | 1.0   | 50.0 |
| <i>u</i> <sub>1303</sub> | C(151)...H(184)  | 531.7(31)  | 31.5(fixed)                             | —        | -0.8  | 31.5 |
| <i>u</i> <sub>1345</sub> | H(144)...C(171)  | 532.1(94)  | 40.8(fixed)                             | —        | 10.9  | 40.8 |
| <i>u</i> <sub>1173</sub> | C(89)...H(114)   | 532.3(191) | 70.2(fixed)                             | —        | 0.2   | 70.2 |
| <i>u</i> <sub>1401</sub> | C(73)...H(106)   | 532.5(88)  | 59.7(fixed)                             | —        | 8.9   | 59.7 |
| <i>u</i> <sub>1387</sub> | H(70)...H(116)   | 532.8(200) | 72.0(fixed)                             | —        | 12.2  | 72.0 |
| <i>u</i> <sub>1307</sub> | H(30)...C(56)    | 532.8(31)  | 31.3(fixed)                             | —        | -2.7  | 31.3 |
| <i>u</i> <sub>1225</sub> | C(7)...H(53)     | 533.2(134) | 83.3(fixed)                             | —        | -3.5  | 83.3 |
| <i>u</i> <sub>1301</sub> | C(151)...H(186)  | 533.4(28)  | 33.3(fixed)                             | —        | -1.7  | 33.3 |
| <i>u</i> <sub>1416</sub> | C(73)...H(119)   | 533.9(75)  | 42.2(fixed)                             | —        | -1.5  | 42.2 |
| <i>u</i> <sub>1314</sub> | C(89)...H(122)   | 534.1(23)  | 26.7(fixed)                             | —        | -4.2  | 26.7 |
| <i>u</i> <sub>1347</sub> | Si(3)...H(46)    | 534.6(60)  | 46.7(fixed)                             | —        | -1.0  | 46.7 |
| <i>u</i> <sub>1313</sub> | Si(125)...H(142) | 535.1(38)  | 30.8(fixed)                             | —        | -4.0  | 30.8 |
| <i>u</i> <sub>1244</sub> | H(132)...H(186)  | 535.4(56)  | 43.3(fixed)                             | —        | 5.4   | 43.3 |
| <i>u</i> <sub>1655</sub> | H(9)...H(30)     | 535.6(135) | 84.7(fixed)                             | —        | -14.1 | 84.7 |
| <i>u</i> <sub>1249</sub> | H(70)...C(85)    | 535.9(99)  | 64.2(fixed)                             | —        | 1.8   | 64.2 |
| <i>u</i> <sub>1306</sub> | H(140)...H(181)  | 536.0(86)  | 68.2(fixed)                             | —        | -10.2 | 68.2 |
| <i>u</i> <sub>1365</sub> | H(10)...C(56)    | 536.0(23)  | 25.8(fixed)                             | —        | -3.8  | 25.8 |
| <i>u</i> <sub>1408</sub> | Si(125)...H(152) | 536.2(40)  | 33.1(fixed)                             | —        | -6.9  | 33.1 |
| <i>u</i> <sub>1379</sub> | Si(4)...H(32)    | 536.3(59)  | 55.5(fixed)                             | —        | -4.4  | 55.5 |
| <i>u</i> <sub>1505</sub> | H(78)...H(86)    | 536.7(80)  | 72.0(fixed)                             | —        | 4.9   | 72.0 |
| <i>u</i> <sub>1289</sub> | H(8)...H(62)     | 537.5(52)  | 39.5(fixed)                             | —        | 1.3   | 39.5 |
| <i>u</i> <sub>1633</sub> | H(132)...H(183)  | 537.7(96)  | 65.4(fixed)                             | —        | -15.1 | 65.4 |
| <i>u</i> <sub>1356</sub> | C(131)...H(185)  | 538.3(24)  | 31.3(fixed)                             | —        | -4.3  | 31.3 |
| <i>u</i> <sub>1337</sub> | H(142)...H(181)  | 538.5(84)  | 69.1(fixed)                             | —        | -7.5  | 69.1 |
| <i>u</i> <sub>1376</sub> | H(29)...C(56)    | 538.6(25)  | 29.4(fixed)                             | —        | -4.9  | 29.4 |
| <i>u</i> <sub>1411</sub> | C(135)...H(182)  | 538.7(62)  | 69.9(fixed)                             | —        | 3.6   | 69.9 |
| <i>u</i> <sub>1220</sub> | C(151)...H(178)  | 538.7(210) | 41.5(fixed)                             | —        | 7.0   | 41.5 |
| <i>u</i> <sub>1410</sub> | Si(66)...C(77)   | 538.7(20)  | 18.4(tied to <i>u</i> <sub>1288</sub> ) | —        | -3.7  | 17.1 |

|                          |                  |            |                                         |   |       |      |
|--------------------------|------------------|------------|-----------------------------------------|---|-------|------|
| <i>u</i> <sub>1451</sub> | H(8)...H(46)     | 539.2(127) | 63.3(fixed)                             | — | -6.1  | 63.3 |
| <i>u</i> <sub>1517</sub> | H(13)...H(28)    | 539.2(105) | 67.2(fixed)                             | — | 0.0   | 67.2 |
| <i>u</i> <sub>1304</sub> | H(13)...H(21)    | 539.5(99)  | 73.8(fixed)                             | — | 4.3   | 73.8 |
| <i>u</i> <sub>1371</sub> | H(134)...C(180)  | 539.7(24)  | 27.9(fixed)                             | — | -4.3  | 27.9 |
| <i>u</i> <sub>1477</sub> | Si(3)...H(28)    | 540.0(57)  | 47.6(fixed)                             | — | -8.8  | 47.6 |
| <i>u</i> <sub>1355</sub> | H(70)...C(118)   | 540.0(23)  | 24.9(fixed)                             | — | -4.6  | 24.9 |
| <i>u</i> <sub>1346</sub> | H(13)...C(19)    | 540.1(72)  | 52.8(fixed)                             | — | 2.4   | 52.8 |
| <i>u</i> <sub>1269</sub> | H(9)...C(51)     | 540.1(116) | 78.9(fixed)                             | — | -2.6  | 78.9 |
| <i>u</i> <sub>1366</sub> | C(139)...H(149)  | 540.2(59)  | 45.2(fixed)                             | — | 4.3   | 45.2 |
| <i>u</i> <sub>1393</sub> | C(77)...H(107)   | 540.6(127) | 64.9(fixed)                             | — | 5.1   | 64.9 |
| <i>u</i> <sub>1352</sub> | H(153)...C(180)  | 540.9(27)  | 26.0(fixed)                             | — | -2.7  | 26.0 |
| <i>u</i> <sub>1456</sub> | H(14)...H(58)    | 541.5(90)  | 63.3(fixed)                             | — | 5.6   | 63.3 |
| <i>u</i> <sub>1431</sub> | H(17)...H(48)    | 542.0(116) | 72.7(fixed)                             | — | 12.3  | 72.7 |
| <i>u</i> <sub>1385</sub> | H(133)...H(148)  | 542.4(134) | 62.2(fixed)                             | — | -9.4  | 62.2 |
| <i>u</i> <sub>1358</sub> | H(134)...H(148)  | 542.6(115) | 54.4(fixed)                             | — | -10.7 | 54.4 |
| <i>u</i> <sub>1377</sub> | H(92)...C(118)   | 543.2(22)  | 25.5(fixed)                             | — | -4.7  | 25.5 |
| <i>u</i> <sub>1190</sub> | H(78)...H(104)   | 543.4(158) | 73.7(fixed)                             | — | 22.6  | 73.7 |
| <i>u</i> <sub>1540</sub> | H(59)...H(62)    | 543.6(74)  | 31.5(fixed)                             | — | -11.4 | 31.5 |
| <i>u</i> <sub>1318</sub> | H(30)...H(60)    | 543.7(59)  | 43.8(fixed)                             | — | 0.4   | 43.8 |
| <i>u</i> <sub>1380</sub> | H(136)...H(166)  | 544.0(132) | 69.1(fixed)                             | — | 9.4   | 69.1 |
| <i>u</i> <sub>1354</sub> | H(132)...C(143)  | 544.0(75)  | 41.5(fixed)                             | — | 5.6   | 41.5 |
| <i>u</i> <sub>1381</sub> | Si(63)...H(84)   | 544.0(33)  | 30.1(fixed)                             | — | -5.0  | 30.1 |
| <i>u</i> <sub>1459</sub> | H(136)...H(150)  | 544.2(86)  | 53.3(fixed)                             | — | -9.2  | 53.3 |
| <i>u</i> <sub>1398</sub> | Si(3)...C(19)    | 544.5(24)  | 20.0(tied to <i>u</i> <sub>1288</sub> ) | — | -5.0  | 18.6 |
| <i>u</i> <sub>1455</sub> | C(7)...C(55)     | 544.9(58)  | 34.5(tied to <i>u</i> <sub>1288</sub> ) | — | -2.7  | 32.1 |
| <i>u</i> <sub>1543</sub> | H(20)...C(51)    | 544.9(150) | 71.2(fixed)                             | — | 3.3   | 71.2 |
| <i>u</i> <sub>1432</sub> | H(142)...H(186)  | 544.9(46)  | 49.1(fixed)                             | — | -5.2  | 49.1 |
| <i>u</i> <sub>1391</sub> | Si(127)...C(143) | 545.2(26)  | 16.9(tied to <i>u</i> <sub>1288</sub> ) | — | -2.2  | 15.8 |
| <i>u</i> <sub>1473</sub> | H(12)...H(26)    | 545.3(81)  | 50.1(fixed)                             | — | -3.3  | 50.1 |
| <i>u</i> <sub>1238</sub> | H(17)...C(51)    | 545.7(109) | 49.8(fixed)                             | — | 7.5   | 49.8 |
| <i>u</i> <sub>1349</sub> | H(82)...H(123)   | 546.3(61)  | 49.8(fixed)                             | — | -5.5  | 49.8 |
| <i>u</i> <sub>1370</sub> | H(140)...H(183)  | 546.8(92)  | 83.1(fixed)                             | — | -10.5 | 83.1 |
| <i>u</i> <sub>1363</sub> | H(154)...H(184)  | 546.9(57)  | 37.2(fixed)                             | — | 2.6   | 37.2 |
| <i>u</i> <sub>1576</sub> | H(70)...H(121)   | 547.5(115) | 76.7(fixed)                             | — | -9.9  | 76.7 |
| <i>u</i> <sub>1406</sub> | Si(128)...C(139) | 547.5(27)  | 16.9(tied to <i>u</i> <sub>1288</sub> ) | — | -2.7  | 15.8 |
| <i>u</i> <sub>1341</sub> | Si(4)...H(41)    | 547.7(77)  | 50.9(fixed)                             | — | -4.7  | 50.9 |
| <i>u</i> <sub>1470</sub> | Si(66)...H(78)   | 547.8(30)  | 31.5(fixed)                             | — | -2.7  | 31.5 |
| <i>u</i> <sub>1388</sub> | H(9)...H(24)     | 548.4(129) | 83.0(fixed)                             | — | -7.6  | 83.0 |
| <i>u</i> <sub>1412</sub> | H(10)...H(24)    | 548.6(111) | 67.1(fixed)                             | — | -12.1 | 67.1 |
| <i>u</i> <sub>1469</sub> | H(133)...H(152)  | 548.7(118) | 49.5(fixed)                             | — | -7.8  | 49.5 |
| <i>u</i> <sub>1394</sub> | H(137)...C(143)  | 548.8(74)  | 46.9(fixed)                             | — | 5.3   | 46.9 |
| <i>u</i> <sub>1502</sub> | C(19)...H(54)    | 548.8(127) | 63.4(fixed)                             | — | 3.1   | 63.4 |
| <i>u</i> <sub>1418</sub> | C(15)...H(25)    | 549.0(47)  | 46.6(fixed)                             | — | 7.7   | 46.6 |
| <i>u</i> <sub>1521</sub> | Si(128)...H(183) | 549.0(30)  | 35.1(fixed)                             | — | -9.4  | 35.1 |
| <i>u</i> <sub>1409</sub> | Si(125)...C(135) | 549.3(18)  | 19.3(tied to <i>u</i> <sub>1288</sub> ) | — | -3.2  | 18.0 |
| <i>u</i> <sub>1403</sub> | Si(63)...H(80)   | 549.4(39)  | 27.2(fixed)                             | — | -4.5  | 27.2 |

|                          |                  |            |                                         |   |       |      |
|--------------------------|------------------|------------|-----------------------------------------|---|-------|------|
| <i>u</i> <sub>1384</sub> | H(134)...H(150)  | 549.5(118) | 68.3(fixed)                             | — | -9.7  | 68.3 |
| <i>u</i> <sub>1537</sub> | H(18)...H(59)    | 549.6(87)  | 49.2(fixed)                             | — | -10.2 | 49.2 |
| <i>u</i> <sub>1322</sub> | H(75)...H(122)   | 549.8(60)  | 51.0(fixed)                             | — | -5.8  | 51.0 |
| <i>u</i> <sub>1506</sub> | H(137)...H(152)  | 549.9(107) | 55.9(fixed)                             | — | 2.1   | 55.9 |
| <i>u</i> <sub>1425</sub> | Si(4)...C(15)    | 550.2(21)  | 16.8(tied to <i>u</i> <sub>1288</sub> ) | — | -2.7  | 15.6 |
| <i>u</i> <sub>1415</sub> | Si(1)...C(11)    | 550.2(18)  | 18.0(tied to <i>u</i> <sub>1288</sub> ) | — | -2.6  | 16.7 |
| <i>u</i> <sub>1436</sub> | Si(4)...C(55)    | 550.2(24)  | 16.8(tied to <i>u</i> <sub>1288</sub> ) | — | -1.8  | 15.6 |
| <i>u</i> <sub>1511</sub> | H(141)...H(184)  | 550.5(48)  | 45.5(fixed)                             | — | -8.1  | 45.5 |
| <i>u</i> <sub>1571</sub> | H(78)...C(85)    | 550.8(59)  | 50.3(fixed)                             | — | -0.1  | 50.3 |
| <i>u</i> <sub>1519</sub> | C(77)...H(91)    | 551.0(70)  | 47.4(fixed)                             | — | 2.1   | 47.4 |
| <i>u</i> <sub>1461</sub> | C(131)...H(165)  | 551.0(135) | 50.0(fixed)                             | — | 6.1   | 50.0 |
| <i>u</i> <sub>1581</sub> | C(69)...H(110)   | 551.1(119) | 78.4(fixed)                             | — | 6.2   | 78.4 |
| <i>u</i> <sub>1440</sub> | Si(63)...C(73)   | 552.0(19)  | 16.3(tied to <i>u</i> <sub>1288</sub> ) | — | -3.7  | 15.2 |
| <i>u</i> <sub>1245</sub> | H(138)...C(163)  | 552.3(125) | 70.4(fixed)                             | — | 11.1  | 70.4 |
| <i>u</i> <sub>1360</sub> | H(137)...H(145)  | 552.4(100) | 58.7(fixed)                             | — | 8.1   | 58.7 |
| <i>u</i> <sub>1487</sub> | H(136)...H(153)  | 552.4(128) | 51.4(fixed)                             | — | 3.1   | 51.4 |
| <i>u</i> <sub>1713</sub> | H(70)...H(110)   | 552.7(139) | 99.9(fixed)                             | — | -0.6  | 99.9 |
| <i>u</i> <sub>1489</sub> | H(74)...H(88)    | 552.7(93)  | 45.9(fixed)                             | — | -5.7  | 45.9 |
| <i>u</i> <sub>1433</sub> | Si(65)...C(81)   | 552.8(23)  | 16.4(tied to <i>u</i> <sub>1288</sub> ) | — | -3.2  | 15.2 |
| <i>u</i> <sub>1475</sub> | H(80)...H(121)   | 553.1(97)  | 44.6(fixed)                             | — | -4.8  | 44.6 |
| <i>u</i> <sub>1696</sub> | H(12)...H(29)    | 553.2(129) | 83.1(fixed)                             | — | -0.8  | 83.1 |
| <i>u</i> <sub>1520</sub> | H(9)...H(57)     | 553.2(80)  | 53.6(fixed)                             | — | 0.8   | 53.6 |
| <i>u</i> <sub>1448</sub> | Si(63)...C(85)   | 553.6(15)  | 17.7(tied to <i>u</i> <sub>1288</sub> ) | — | -2.9  | 16.5 |
| <i>u</i> <sub>1709</sub> | H(152)...H(182)  | 554.4(65)  | 70.4(fixed)                             | — | -13.9 | 70.4 |
| <i>u</i> <sub>1419</sub> | C(139)...H(153)  | 554.5(83)  | 47.4(fixed)                             | — | 4.2   | 47.4 |
| <i>u</i> <sub>1447</sub> | Si(128)...H(176) | 554.7(100) | 44.4(fixed)                             | — | -3.4  | 44.4 |
| <i>u</i> <sub>1444</sub> | Si(66)...C(117)  | 555.2(21)  | 17.2(tied to <i>u</i> <sub>1288</sub> ) | — | -1.9  | 16.0 |
| <i>u</i> <sub>1439</sub> | H(17)...C(47)    | 555.5(91)  | 55.9(fixed)                             | — | 8.7   | 55.9 |
| <i>u</i> <sub>1206</sub> | H(138)...H(165)  | 555.6(152) | 81.7(fixed)                             | — | 8.5   | 81.7 |
| <i>u</i> <sub>1443</sub> | C(19)...H(53)    | 555.6(89)  | 66.7(fixed)                             | — | 7.1   | 66.7 |
| <i>u</i> <sub>1458</sub> | H(75)...C(81)    | 556.1(63)  | 40.0(fixed)                             | — | 3.3   | 40.0 |
| <i>u</i> <sub>1405</sub> | Si(1)...H(28)    | 556.4(37)  | 37.2(fixed)                             | — | -5.3  | 37.2 |
| <i>u</i> <sub>1550</sub> | H(70)...C(113)   | 556.4(150) | 59.1(fixed)                             | — | 5.0   | 59.1 |
| <i>u</i> <sub>1392</sub> | Si(66)...H(107)  | 556.7(139) | 47.5(fixed)                             | — | -3.9  | 47.5 |
| <i>u</i> <sub>1582</sub> | C(131)...H(166)  | 556.7(140) | 53.8(fixed)                             | — | 1.2   | 53.8 |
| <i>u</i> <sub>1507</sub> | H(181)...H(185)  | 556.8(47)  | 40.2(fixed)                             | — | -5.4  | 40.2 |
| <i>u</i> <sub>1596</sub> | Si(66)...H(94)   | 557.0(82)  | 40.7(fixed)                             | — | -2.5  | 40.7 |
| <i>u</i> <sub>1549</sub> | H(72)...H(112)   | 557.0(95)  | 62.6(fixed)                             | — | 12.8  | 62.6 |
| <i>u</i> <sub>1460</sub> | Si(125)...C(147) | 557.3(9)   | 16.5(tied to <i>u</i> <sub>1288</sub> ) | — | -2.1  | 15.4 |
| <i>u</i> <sub>1464</sub> | Si(1)...C(23)    | 557.4(8)   | 17.3(tied to <i>u</i> <sub>1288</sub> ) | — | -4.7  | 16.1 |
| <i>u</i> <sub>1697</sub> | H(134)...H(166)  | 557.7(154) | 62.1(fixed)                             | — | -1.0  | 62.1 |
| <i>u</i> <sub>1482</sub> | Si(4)...H(58)    | 558.0(39)  | 28.3(fixed)                             | — | -0.4  | 28.3 |
| <i>u</i> <sub>1454</sub> | Si(127)...H(164) | 558.1(109) | 33.9(fixed)                             | — | -1.3  | 33.9 |
| <i>u</i> <sub>1420</sub> | H(79)...H(106)   | 558.1(167) | 75.1(fixed)                             | — | 1.3   | 75.1 |
| <i>u</i> <sub>1728</sub> | H(74)...H(92)    | 558.1(135) | 71.6(fixed)                             | — | -10.5 | 71.6 |
| <i>u</i> <sub>1402</sub> | Si(128)...H(177) | 558.1(119) | 45.0(fixed)                             | — | -3.6  | 45.0 |

|                          |                  |            |                                         |   |       |       |
|--------------------------|------------------|------------|-----------------------------------------|---|-------|-------|
| <i>u</i> <sub>1453</sub> | H(144)...H(174)  | 558.2(99)  | 47.3(fixed)                             | — | 13.1  | 47.3  |
| <i>u</i> <sub>1474</sub> | H(29)...H(62)    | 558.3(48)  | 38.6(fixed)                             | — | -4.8  | 38.6  |
| <i>u</i> <sub>1399</sub> | C(11)...H(44)    | 558.3(61)  | 54.6(fixed)                             | — | 16.4  | 54.6  |
| <i>u</i> <sub>1496</sub> | Si(1)...H(9)     | 558.4(39)  | 34.0(fixed)                             | — | -7.1  | 34.0  |
| <i>u</i> <sub>1400</sub> | C(69)...C(85)    | 558.7(79)  | 48.1(tied to <i>u</i> <sub>1288</sub> ) | — | -3.4  | 44.7  |
| <i>u</i> <sub>1429</sub> | Si(3)...H(21)    | 558.9(40)  | 35.9(fixed)                             | — | -3.8  | 35.9  |
| <i>u</i> <sub>1500</sub> | Si(125)...H(133) | 559.2(39)  | 39.6(fixed)                             | — | -7.1  | 39.6  |
| <i>u</i> <sub>1490</sub> | H(181)...H(184)  | 559.4(51)  | 31.9(fixed)                             | — | -0.6  | 31.9  |
| <i>u</i> <sub>1471</sub> | H(10)...H(61)    | 559.7(32)  | 32.9(fixed)                             | — | -3.0  | 32.9  |
| <i>u</i> <sub>1493</sub> | Si(125)...H(146) | 559.8(39)  | 24.3(fixed)                             | — | -6.3  | 24.3  |
| <i>u</i> <sub>1529</sub> | H(72)...C(113)   | 560.0(136) | 54.6(fixed)                             | — | 4.7   | 54.6  |
| <i>u</i> <sub>1708</sub> | H(133)...H(183)  | 560.3(86)  | 80.2(fixed)                             | — | -14.8 | 80.2  |
| <i>u</i> <sub>1446</sub> | Si(125)...H(138) | 560.5(30)  | 32.7(fixed)                             | — | -1.3  | 32.7  |
| <i>u</i> <sub>1516</sub> | H(72)...H(116)   | 560.6(174) | 70.3(fixed)                             | — | 4.1   | 70.3  |
| <i>u</i> <sub>1554</sub> | C(143)...C(179)  | 560.7(65)  | 32.6(tied to <i>u</i> <sub>1288</sub> ) | — | -3.0  | 30.3  |
| <i>u</i> <sub>1618</sub> | H(137)...H(154)  | 560.8(102) | 47.6(fixed)                             | — | -3.1  | 47.6  |
| <i>u</i> <sub>1476</sub> | Si(4)...H(40)    | 561.1(60)  | 44.6(fixed)                             | — | -4.6  | 44.6  |
| <i>u</i> <sub>1628</sub> | H(138)...H(153)  | 561.2(106) | 46.1(fixed)                             | — | -3.4  | 46.1  |
| <i>u</i> <sub>1413</sub> | H(141)...H(153)  | 561.9(91)  | 60.7(fixed)                             | — | 6.0   | 60.7  |
| <i>u</i> <sub>1445</sub> | Si(66)...H(71)   | 562.0(51)  | 35.2(fixed)                             | — | -5.6  | 35.2  |
| <i>u</i> <sub>1422</sub> | H(153)...H(186)  | 562.3(50)  | 35.4(fixed)                             | — | -0.4  | 35.4  |
| <i>u</i> <sub>1533</sub> | H(14)...C(55)    | 562.5(72)  | 45.3(fixed)                             | — | 1.9   | 45.3  |
| <i>u</i> <sub>1706</sub> | H(14)...H(29)    | 562.6(107) | 68.4(fixed)                             | — | -7.2  | 68.4  |
| <i>u</i> <sub>1681</sub> | H(13)...H(30)    | 563.5(100) | 54.7(fixed)                             | — | -4.7  | 54.7  |
| <i>u</i> <sub>1230</sub> | H(25)...H(54)    | 563.5(168) | 104.4(fixed)                            | — | 24.5  | 104.4 |
| <i>u</i> <sub>1491</sub> | H(133)...H(150)  | 563.5(118) | 68.3(fixed)                             | — | -9.8  | 68.3  |
| <i>u</i> <sub>1501</sub> | H(8)...C(19)     | 563.7(70)  | 51.0(fixed)                             | — | 0.5   | 51.0  |
| <i>u</i> <sub>1479</sub> | Si(1)...H(14)    | 563.7(30)  | 31.6(fixed)                             | — | -0.9  | 31.6  |
| <i>u</i> <sub>1488</sub> | H(72)...H(124)   | 563.7(31)  | 31.3(fixed)                             | — | -7.2  | 31.3  |
| <i>u</i> <sub>1767</sub> | H(74)...H(90)    | 564.0(111) | 66.7(fixed)                             | — | -8.1  | 66.7  |
| <i>u</i> <sub>1485</sub> | C(77)...H(106)   | 564.0(145) | 60.1(fixed)                             | — | 1.0   | 60.1  |
| <i>u</i> <sub>1466</sub> | Si(127)...H(145) | 564.9(39)  | 29.2(fixed)                             | — | -1.6  | 29.2  |
| <i>u</i> <sub>1524</sub> | Si(63)...H(86)   | 565.0(35)  | 29.5(fixed)                             | — | -1.5  | 29.5  |
| <i>u</i> <sub>1273</sub> | C(15)...H(54)    | 565.3(128) | 61.7(fixed)                             | — | 6.7   | 61.7  |
| <i>u</i> <sub>1396</sub> | C(77)...H(104)   | 566.3(150) | 63.0(fixed)                             | — | 12.3  | 63.0  |
| <i>u</i> <sub>1497</sub> | H(91)...H(122)   | 566.5(33)  | 31.4(fixed)                             | — | -6.2  | 31.4  |
| <i>u</i> <sub>1332</sub> | C(135)...H(165)  | 566.5(131) | 62.6(fixed)                             | — | 5.1   | 62.6  |
| <i>u</i> <sub>1522</sub> | Si(1)...H(22)    | 566.7(38)  | 29.9(fixed)                             | — | -4.9  | 29.9  |
| <i>u</i> <sub>1414</sub> | H(70)...H(124)   | 567.0(36)  | 35.2(fixed)                             | — | -4.4  | 35.2  |
| <i>u</i> <sub>1450</sub> | H(10)...C(47)    | 567.2(72)  | 58.8(fixed)                             | — | 12.1  | 58.8  |
| <i>u</i> <sub>1538</sub> | H(70)...H(123)   | 567.3(30)  | 30.5(fixed)                             | — | -7.3  | 30.5  |
| <i>u</i> <sub>1560</sub> | Si(65)...H(108)  | 567.3(83)  | 38.9(fixed)                             | — | -3.2  | 38.9  |
| <i>u</i> <sub>1421</sub> | H(14)...H(21)    | 567.3(108) | 84.0(fixed)                             | — | 3.6   | 84.0  |
| <i>u</i> <sub>1759</sub> | H(70)...C(109)   | 567.5(98)  | 80.4(fixed)                             | — | -1.6  | 80.4  |
| <i>u</i> <sub>1541</sub> | H(142)...H(183)  | 568.5(80)  | 78.7(fixed)                             | — | -11.3 | 78.7  |
| <i>u</i> <sub>1531</sub> | H(134)...H(185)  | 568.6(30)  | 34.8(fixed)                             | — | -4.7  | 34.8  |



|                          |                  |            |                                         |   |       |      |
|--------------------------|------------------|------------|-----------------------------------------|---|-------|------|
| <i>u</i> <sub>1638</sub> | C(11)...H(58)    | 568.6(76)  | 51.0(fixed)                             | — | -2.4  | 51.0 |
| <i>u</i> <sub>1465</sub> | H(79)...C(105)   | 568.8(147) | 65.5(fixed)                             | — | 3.4   | 65.5 |
| <i>u</i> <sub>1625</sub> | C(77)...C(85)    | 568.9(48)  | 35.1(tied to <i>u</i> <sub>1288</sub> ) | — | -3.3  | 32.6 |
| <i>u</i> <sub>1361</sub> | Si(66)...H(114)  | 570.1(74)  | 47.0(fixed)                             | — | -3.6  | 47.0 |
| <i>u</i> <sub>1478</sub> | H(92)...H(122)   | 570.3(36)  | 34.4(fixed)                             | — | -4.5  | 34.4 |
| <i>u</i> <sub>1510</sub> | H(10)...H(62)    | 570.4(33)  | 32.6(fixed)                             | — | -6.1  | 32.6 |
| <i>u</i> <sub>1671</sub> | C(77)...H(86)    | 570.7(69)  | 58.4(fixed)                             | — | -2.6  | 58.4 |
| <i>u</i> <sub>1578</sub> | H(80)...H(122)   | 571.0(31)  | 35.4(fixed)                             | — | -10.4 | 35.4 |
| <i>u</i> <sub>1483</sub> | H(148)...H(178)  | 571.3(57)  | 57.5(fixed)                             | — | 14.4  | 57.5 |
| <i>u</i> <sub>1526</sub> | Si(66)...H(119)  | 571.4(36)  | 29.1(fixed)                             | — | -1.2  | 29.1 |
| <i>u</i> <sub>1606</sub> | C(11)...C(55)    | 571.6(58)  | 33.5(tied to <i>u</i> <sub>1288</sub> ) | — | -2.7  | 31.2 |
| <i>u</i> <sub>1504</sub> | Si(128)...H(141) | 571.7(37)  | 27.7(fixed)                             | — | -2.1  | 27.7 |
| <i>u</i> <sub>1786</sub> | H(9)...H(28)     | 571.9(111) | 88.5(fixed)                             | — | -13.7 | 88.5 |
| <i>u</i> <sub>1528</sub> | H(92)...H(124)   | 572.0(36)  | 32.1(fixed)                             | — | -7.4  | 32.1 |
| <i>u</i> <sub>1508</sub> | H(154)...H(186)  | 572.1(27)  | 35.9(fixed)                             | — | -4.6  | 35.9 |
| <i>u</i> <sub>1330</sub> | H(84)...H(114)   | 572.4(132) | 71.0(fixed)                             | — | -0.7  | 71.0 |
| <i>u</i> <sub>1691</sub> | H(71)...H(121)   | 572.7(113) | 64.9(fixed)                             | — | -7.4  | 64.9 |
| <i>u</i> <sub>1752</sub> | H(75)...H(107)   | 572.7(122) | 82.6(fixed)                             | — | -0.3  | 82.6 |
| <i>u</i> <sub>1509</sub> | H(30)...H(62)    | 572.8(27)  | 33.8(fixed)                             | — | -6.8  | 33.8 |
| <i>u</i> <sub>1498</sub> | H(8)...H(61)     | 572.9(29)  | 32.3(fixed)                             | — | -5.3  | 32.3 |
| <i>u</i> <sub>1635</sub> | H(8)...H(57)     | 573.0(69)  | 44.9(fixed)                             | — | -3.9  | 44.9 |
| <i>u</i> <sub>1562</sub> | H(88)...H(123)   | 573.1(34)  | 34.2(fixed)                             | — | -12.2 | 34.2 |
| <i>u</i> <sub>1605</sub> | C(147)...H(181)  | 573.3(63)  | 47.5(fixed)                             | — | 4.9   | 47.5 |
| <i>u</i> <sub>1569</sub> | H(21)...H(58)    | 573.4(59)  | 56.1(fixed)                             | — | 7.6   | 56.1 |
| <i>u</i> <sub>1518</sub> | C(73)...H(120)   | 573.4(83)  | 43.0(fixed)                             | — | -3.0  | 43.0 |
| <i>u</i> <sub>1572</sub> | H(149)...H(181)  | 573.5(97)  | 55.6(fixed)                             | — | 9.4   | 55.6 |
| <i>u</i> <sub>1486</sub> | H(134)...H(186)  | 573.7(35)  | 34.5(fixed)                             | — | -4.8  | 34.5 |
| <i>u</i> <sub>1441</sub> | H(9)...H(52)     | 573.8(120) | 96.6(fixed)                             | — | -3.7  | 96.6 |
| <i>u</i> <sub>1515</sub> | H(132)...H(185)  | 574.0(30)  | 37.5(fixed)                             | — | -5.7  | 37.5 |
| <i>u</i> <sub>1480</sub> | C(147)...H(178)  | 574.8(86)  | 47.3(fixed)                             | — | 10.6  | 47.3 |
| <i>u</i> <sub>1613</sub> | C(179)...H(186)  | 575.0(38)  | 22.1(fixed)                             | — | -9.6  | 22.1 |
| <i>u</i> <sub>1579</sub> | Si(63)...H(75)   | 575.3(33)  | 27.8(fixed)                             | — | -4.0  | 27.8 |
| <i>u</i> <sub>1499</sub> | Si(66)...H(104)  | 575.4(93)  | 47.2(fixed)                             | — | 5.2   | 47.2 |
| <i>u</i> <sub>1741</sub> | H(72)...H(111)   | 575.5(89)  | 73.2(fixed)                             | — | 4.0   | 73.2 |
| <i>u</i> <sub>1484</sub> | H(16)...H(46)    | 575.6(99)  | 63.6(fixed)                             | — | -6.2  | 63.6 |
| <i>u</i> <sub>1536</sub> | H(29)...H(60)    | 575.7(27)  | 32.5(fixed)                             | — | -7.5  | 32.5 |
| <i>u</i> <sub>1424</sub> | C(135)...C(163)  | 575.8(111) | 54.0(tied to <i>u</i> <sub>1288</sub> ) | — | 3.9   | 50.2 |
| <i>u</i> <sub>1748</sub> | C(69)...C(109)   | 576.1(79)  | 68.0(tied to <i>u</i> <sub>1727</sub> ) | — | 1.0   | 56.5 |
| <i>u</i> <sub>1611</sub> | Si(66)...H(79)   | 576.3(21)  | 26.8(fixed)                             | — | -5.3  | 26.8 |
| <i>u</i> <sub>1452</sub> | H(134)...H(169)  | 576.3(88)  | 91.7(fixed)                             | — | 15.6  | 91.7 |
| <i>u</i> <sub>1430</sub> | H(71)...H(87)    | 576.4(117) | 62.3(fixed)                             | — | 5.1   | 62.3 |
| <i>u</i> <sub>1437</sub> | C(81)...C(105)   | 576.6(210) | 42.6(tied to <i>u</i> <sub>1288</sub> ) | — | -0.7  | 39.7 |
| <i>u</i> <sub>1367</sub> | H(28)...H(52)    | 576.6(101) | 59.6(fixed)                             | — | 17.4  | 59.6 |
| <i>u</i> <sub>1590</sub> | Si(4)...H(57)    | 576.7(33)  | 28.0(fixed)                             | — | -2.1  | 28.0 |
| <i>u</i> <sub>1342</sub> | C(23)...H(54)    | 576.9(107) | 79.5(fixed)                             | — | 15.1  | 79.5 |
| <i>u</i> <sub>1740</sub> | H(134)...C(163)  | 576.9(142) | 51.4(fixed)                             | — | 0.7   | 51.4 |

|                          |                  |            |                                         |   |       |      |
|--------------------------|------------------|------------|-----------------------------------------|---|-------|------|
| <i>u</i> <sub>1645</sub> | Si(4)...H(44)    | 577.0(101) | 55.0(fixed)                             | — | 3.0   | 55.0 |
| <i>u</i> <sub>1586</sub> | Si(66)...H(120)  | 577.2(35)  | 27.2(fixed)                             | — | -2.1  | 27.2 |
| <i>u</i> <sub>1423</sub> | H(82)...H(108)   | 577.3(268) | 62.2(fixed)                             | — | 4.2   | 62.2 |
| <i>u</i> <sub>1553</sub> | H(12)...H(60)    | 577.4(39)  | 39.5(fixed)                             | — | -14.0 | 39.5 |
| <i>u</i> <sub>1556</sub> | H(10)...H(26)    | 577.4(110) | 68.1(fixed)                             | — | -10.0 | 68.1 |
| <i>u</i> <sub>1463</sub> | H(146)...H(177)  | 577.5(145) | 47.3(fixed)                             | — | -7.7  | 47.3 |
| <i>u</i> <sub>1608</sub> | Si(1)...H(24)    | 577.7(17)  | 30.8(fixed)                             | — | -5.2  | 30.8 |
| <i>u</i> <sub>1555</sub> | Si(4)...H(17)    | 577.7(29)  | 25.5(fixed)                             | — | -1.3  | 25.5 |
| <i>u</i> <sub>1587</sub> | H(136)...H(184)  | 578.1(38)  | 36.3(fixed)                             | — | -15.2 | 36.3 |
| <i>u</i> <sub>1570</sub> | C(15)...H(24)    | 578.1(60)  | 52.3(fixed)                             | — | 1.9   | 52.3 |
| <i>u</i> <sub>1636</sub> | H(76)...C(81)    | 578.4(69)  | 49.3(fixed)                             | — | -1.4  | 49.3 |
| <i>u</i> <sub>1600</sub> | C(73)...C(117)   | 578.4(58)  | 27.3(tied to <i>u</i> <sub>1288</sub> ) | — | -4.6  | 25.4 |
| <i>u</i> <sub>1559</sub> | Si(65)...H(82)   | 578.4(36)  | 26.8(fixed)                             | — | -2.2  | 26.8 |
| <i>u</i> <sub>1438</sub> | H(137)...H(166)  | 579.0(111) | 73.6(fixed)                             | — | 6.7   | 73.6 |
| <i>u</i> <sub>1527</sub> | Si(63)...H(90)   | 579.0(40)  | 30.4(fixed)                             | — | -6.1  | 30.4 |
| <i>u</i> <sub>1449</sub> | C(151)...C(175)  | 579.5(175) | 34.4(tied to <i>u</i> <sub>1288</sub> ) | — | -0.3  | 32.0 |
| <i>u</i> <sub>1657</sub> | H(74)...H(119)   | 579.8(83)  | 47.1(fixed)                             | — | -1.0  | 47.1 |
| <i>u</i> <sub>1557</sub> | Si(63)...H(76)   | 579.8(24)  | 27.9(fixed)                             | — | -4.2  | 27.9 |
| <i>u</i> <sub>1492</sub> | C(11)...H(21)    | 580.0(83)  | 60.4(fixed)                             | — | -1.6  | 60.4 |
| <i>u</i> <sub>1749</sub> | C(73)...H(107)   | 580.1(93)  | 65.1(fixed)                             | — | -0.8  | 65.1 |
| <i>u</i> <sub>1664</sub> | H(182)...H(186)  | 580.3(52)  | 49.0(fixed)                             | — | -6.7  | 49.0 |
| <i>u</i> <sub>1312</sub> | H(90)...H(114)   | 580.3(198) | 84.9(fixed)                             | — | -2.1  | 84.9 |
| <i>u</i> <sub>1566</sub> | H(71)...C(118)   | 580.5(17)  | 19.1(fixed)                             | — | -6.8  | 19.1 |
| <i>u</i> <sub>1654</sub> | C(15)...H(29)    | 580.6(74)  | 64.4(fixed)                             | — | 3.4   | 64.4 |
| <i>u</i> <sub>1701</sub> | H(76)...H(119)   | 580.6(71)  | 43.3(fixed)                             | — | -4.8  | 43.3 |
| <i>u</i> <sub>1665</sub> | H(80)...H(107)   | 580.6(141) | 68.0(fixed)                             | — | 5.8   | 68.0 |
| <i>u</i> <sub>1565</sub> | Si(4)...H(16)    | 580.7(21)  | 29.2(fixed)                             | — | -3.1  | 29.2 |
| <i>u</i> <sub>1532</sub> | H(142)...H(149)  | 580.7(73)  | 49.5(fixed)                             | — | 5.4   | 49.5 |
| <i>u</i> <sub>1545</sub> | H(153)...H(184)  | 580.9(27)  | 34.0(fixed)                             | — | -4.5  | 34.0 |
| <i>u</i> <sub>1574</sub> | Si(1)...H(25)    | 581.2(25)  | 33.8(fixed)                             | — | -3.7  | 33.8 |
| <i>u</i> <sub>1567</sub> | Si(125)...H(149) | 581.4(26)  | 29.2(fixed)                             | — | -0.6  | 29.2 |
| <i>u</i> <sub>1661</sub> | H(12)...H(57)    | 581.8(83)  | 48.7(fixed)                             | — | 1.5   | 48.7 |
| <i>u</i> <sub>1568</sub> | H(90)...C(118)   | 581.9(22)  | 19.7(fixed)                             | — | -6.9  | 19.7 |
| <i>u</i> <sub>1649</sub> | H(138)...H(145)  | 582.3(105) | 61.4(fixed)                             | — | 3.2   | 61.4 |
| <i>u</i> <sub>1547</sub> | H(72)...H(90)    | 582.4(96)  | 75.7(fixed)                             | — | -9.1  | 75.7 |
| <i>u</i> <sub>1686</sub> | H(16)...H(25)    | 582.9(46)  | 49.3(fixed)                             | — | 3.2   | 49.3 |
| <i>u</i> <sub>1573</sub> | C(11)...C(19)    | 583.5(56)  | 41.4(tied to <i>u</i> <sub>1288</sub> ) | — | -5.2  | 38.5 |
| <i>u</i> <sub>1644</sub> | H(71)...H(123)   | 583.5(36)  | 34.4(fixed)                             | — | -5.9  | 34.4 |
| <i>u</i> <sub>1594</sub> | H(90)...H(124)   | 583.6(47)  | 35.9(fixed)                             | — | -5.8  | 35.9 |
| <i>u</i> <sub>1583</sub> | H(28)...C(56)    | 583.6(14)  | 20.9(fixed)                             | — | -9.8  | 20.9 |
| <i>u</i> <sub>1599</sub> | Si(125)...H(148) | 583.6(17)  | 29.0(fixed)                             | — | -1.6  | 29.0 |
| <i>u</i> <sub>1561</sub> | H(9)...C(56)     | 583.6(18)  | 20.4(fixed)                             | — | -7.3  | 20.4 |
| <i>u</i> <sub>1670</sub> | H(144)...H(172)  | 583.9(135) | 45.4(fixed)                             | — | 7.5   | 45.4 |
| <i>u</i> <sub>1747</sub> | H(75)...C(105)   | 583.9(87)  | 67.9(fixed)                             | — | 3.1   | 67.9 |
| <i>u</i> <sub>1729</sub> | Si(127)...H(157) | 584.2(94)  | 50.5(fixed)                             | — | 1.4   | 50.5 |
| <i>u</i> <sub>1442</sub> | H(90)...H(115)   | 584.3(239) | 82.2(fixed)                             | — | -8.2  | 82.2 |

|                          |                  |            |                                         |   |       |      |
|--------------------------|------------------|------------|-----------------------------------------|---|-------|------|
| <i>u</i> <sub>1637</sub> | Si(63)...H(87)   | 584.4(11)  | 29.3(fixed)                             | — | -4.0  | 29.3 |
| <i>u</i> <sub>1703</sub> | H(10)...H(58)    | 584.6(67)  | 48.4(fixed)                             | — | -2.1  | 48.4 |
| <i>u</i> <sub>1467</sub> | Si(66)...H(108)  | 584.8(112) | 47.4(fixed)                             | — | -2.9  | 47.4 |
| <i>u</i> <sub>1610</sub> | C(139)...C(147)  | 584.9(49)  | 27.5(tied to <i>u</i> <sub>1288</sub> ) | — | -3.4  | 25.6 |
| <i>u</i> <sub>1781</sub> | H(138)...C(151)  | 585.0(80)  | 39.5(fixed)                             | — | -7.4  | 39.5 |
| <i>u</i> <sub>1630</sub> | H(140)...H(149)  | 585.0(49)  | 47.2(fixed)                             | — | 1.4   | 47.2 |
| <i>u</i> <sub>1667</sub> | C(135)...C(179)  | 585.1(43)  | 40.0(tied to <i>u</i> <sub>1288</sub> ) | — | -5.0  | 37.2 |
| <i>u</i> <sub>1780</sub> | H(121)...H(124)  | 585.2(71)  | 34.1(fixed)                             | — | -9.3  | 34.1 |
| <i>u</i> <sub>1717</sub> | H(75)...H(119)   | 585.3(79)  | 49.4(fixed)                             | — | -3.4  | 49.4 |
| <i>u</i> <sub>1619</sub> | Si(1)...H(13)    | 585.4(25)  | 28.3(fixed)                             | — | -3.1  | 28.3 |
| <i>u</i> <sub>1615</sub> | C(15)...C(23)    | 585.6(41)  | 29.5(tied to <i>u</i> <sub>1288</sub> ) | — | 0.2   | 27.4 |
| <i>u</i> <sub>1589</sub> | Si(125)...H(137) | 585.6(26)  | 28.8(fixed)                             | — | -4.5  | 28.8 |
| <i>u</i> <sub>1602</sub> | H(138)...H(182)  | 585.7(61)  | 70.7(fixed)                             | — | 2.8   | 70.7 |
| <i>u</i> <sub>1647</sub> | C(69)...H(116)   | 585.7(173) | 57.8(fixed)                             | — | 4.1   | 57.8 |
| <i>u</i> <sub>1779</sub> | H(14)...C(27)    | 585.7(81)  | 51.3(fixed)                             | — | -10.9 | 51.3 |
| <i>u</i> <sub>1760</sub> | C(135)...H(154)  | 585.9(88)  | 38.7(fixed)                             | — | -6.7  | 38.7 |
| <i>u</i> <sub>1632</sub> | Si(3)...H(20)    | 586.0(23)  | 26.1(fixed)                             | — | -7.1  | 26.1 |
| <i>u</i> <sub>1735</sub> | H(137)...H(182)  | 586.1(66)  | 70.2(fixed)                             | — | -1.6  | 70.2 |
| <i>u</i> <sub>1669</sub> | H(80)...H(87)    | 586.3(66)  | 50.7(fixed)                             | — | 5.8   | 50.7 |
| <i>u</i> <sub>1462</sub> | Si(3)...H(53)    | 586.4(99)  | 60.4(fixed)                             | — | -5.8  | 60.4 |
| <i>u</i> <sub>1514</sub> | Si(65)...H(104)  | 586.5(91)  | 46.7(fixed)                             | — | 7.6   | 46.7 |
| <i>u</i> <sub>1584</sub> | Si(65)...H(83)   | 586.6(25)  | 30.0(fixed)                             | — | -3.5  | 30.0 |
| <i>u</i> <sub>1612</sub> | Si(127)...H(144) | 587.2(26)  | 22.9(fixed)                             | — | -2.6  | 22.9 |
| <i>u</i> <sub>1622</sub> | Si(128)...H(140) | 587.2(22)  | 24.7(fixed)                             | — | -3.7  | 24.7 |
| <i>u</i> <sub>1597</sub> | H(22)...H(61)    | 587.3(33)  | 36.1(fixed)                             | — | -10.2 | 36.1 |
| <i>u</i> <sub>1593</sub> | H(133)...C(180)  | 587.8(19)  | 21.2(fixed)                             | — | -7.6  | 21.2 |
| <i>u</i> <sub>1428</sub> | H(152)...H(178)  | 587.8(223) | 53.4(fixed)                             | — | 5.3   | 53.4 |
| <i>u</i> <sub>1544</sub> | H(132)...H(146)  | 587.9(87)  | 47.1(fixed)                             | — | 7.1   | 47.1 |
| <i>u</i> <sub>1598</sub> | H(13)...H(22)    | 588.3(78)  | 55.9(fixed)                             | — | 2.9   | 55.9 |
| <i>u</i> <sub>1676</sub> | H(16)...H(24)    | 588.4(59)  | 56.8(fixed)                             | — | 5.9   | 56.8 |
| <i>u</i> <sub>1588</sub> | H(152)...C(180)  | 588.7(14)  | 19.3(fixed)                             | — | -6.3  | 19.3 |
| <i>u</i> <sub>1525</sub> | H(20)...H(58)    | 588.7(48)  | 50.2(fixed)                             | — | 8.9   | 50.2 |
| <i>u</i> <sub>1643</sub> | C(89)...H(123)   | 588.8(21)  | 17.4(fixed)                             | — | -6.7  | 17.4 |
| <i>u</i> <sub>1604</sub> | H(14)...C(19)    | 588.8(81)  | 65.4(fixed)                             | — | -4.0  | 65.4 |
| <i>u</i> <sub>1614</sub> | C(131)...H(184)  | 588.9(20)  | 19.8(fixed)                             | — | -8.2  | 19.8 |
| <i>u</i> <sub>1601</sub> | C(131)...C(143)  | 589.2(58)  | 31.1(tied to <i>u</i> <sub>1727</sub> ) | — | -2.0  | 25.9 |
| <i>u</i> <sub>1627</sub> | H(132)...H(144)  | 589.2(80)  | 43.3(fixed)                             | — | 3.3   | 43.3 |
| <i>u</i> <sub>1513</sub> | H(12)...H(44)    | 589.2(62)  | 60.1(fixed)                             | — | 20.0  | 60.1 |
| <i>u</i> <sub>1672</sub> | C(73)...C(81)    | 589.6(44)  | 27.8(tied to <i>u</i> <sub>1288</sub> ) | — | -2.3  | 25.8 |
| <i>u</i> <sub>1631</sub> | H(146)...H(185)  | 589.6(32)  | 38.5(fixed)                             | — | -16.6 | 38.5 |
| <i>u</i> <sub>1806</sub> | H(78)...H(91)    | 589.6(78)  | 50.2(fixed)                             | — | -1.9  | 50.2 |
| <i>u</i> <sub>1744</sub> | H(145)...H(181)  | 589.6(83)  | 47.0(fixed)                             | — | -0.9  | 47.0 |
| <i>u</i> <sub>1659</sub> | C(151)...H(185)  | 589.7(14)  | 18.0(fixed)                             | — | -8.9  | 18.0 |
| <i>u</i> <sub>1865</sub> | H(152)...H(183)  | 589.7(60)  | 65.2(fixed)                             | — | -15.0 | 65.2 |
| <i>u</i> <sub>1652</sub> | C(77)...C(105)   | 589.7(120) | 55.6(tied to <i>u</i> <sub>1727</sub> ) | — | -0.9  | 46.2 |
| <i>u</i> <sub>1658</sub> | C(69)...H(122)   | 589.7(16)  | 16.6(fixed)                             | — | -7.0  | 16.6 |

|                          |                 |            |                                         |   |       |      |
|--------------------------|-----------------|------------|-----------------------------------------|---|-------|------|
| <i>u</i> <sub>1694</sub> | H(10)...H(59)   | 589.9(81)  | 55.1(fixed)                             | — | 2.1   | 55.1 |
| <i>u</i> <sub>1639</sub> | C(7)...H(60)    | 590.0(18)  | 17.4(fixed)                             | — | -7.0  | 17.4 |
| <i>u</i> <sub>1692</sub> | C(139)...H(148) | 590.1(67)  | 49.1(fixed)                             | — | -3.7  | 49.1 |
| <i>u</i> <sub>1668</sub> | H(136)...H(182) | 590.4(68)  | 75.4(fixed)                             | — | 5.3   | 75.4 |
| <i>u</i> <sub>1523</sub> | H(83)...H(114)  | 590.4(175) | 60.5(fixed)                             | — | -8.6  | 60.5 |
| <i>u</i> <sub>1738</sub> | H(144)...H(183) | 590.4(106) | 52.7(fixed)                             | — | -0.3  | 52.7 |
| <i>u</i> <sub>1718</sub> | C(135)...H(181) | 591.0(60)  | 51.0(fixed)                             | — | -4.5  | 51.0 |
| <i>u</i> <sub>1684</sub> | H(133)...H(165) | 591.1(154) | 56.2(fixed)                             | — | 7.2   | 56.2 |
| <i>u</i> <sub>1680</sub> | C(135)...C(143) | 591.1(56)  | 33.5(tied to <i>u</i> <sub>1288</sub> ) | — | -2.1  | 31.2 |
| <i>u</i> <sub>1712</sub> | C(19)...C(51)   | 591.2(96)  | 55.7(tied to <i>u</i> <sub>1727</sub> ) | — | -0.2  | 46.3 |
| <i>u</i> <sub>1609</sub> | H(76)...H(120)  | 591.3(81)  | 53.2(fixed)                             | — | -1.8  | 53.2 |
| <i>u</i> <sub>1736</sub> | H(74)...H(106)  | 591.9(112) | 63.3(fixed)                             | — | 6.6   | 63.3 |
| <i>u</i> <sub>1580</sub> | H(20)...C(55)   | 592.1(38)  | 42.7(fixed)                             | — | 5.3   | 42.7 |
| <i>u</i> <sub>1621</sub> | C(135)...H(145) | 592.2(81)  | 43.5(fixed)                             | — | 1.1   | 43.5 |
| <i>u</i> <sub>1617</sub> | Si(65)...Si(67) | 592.3(38)  | 19.2(tied to <i>u</i> <sub>1288</sub> ) | — | -1.6  | 17.8 |
| <i>u</i> <sub>1679</sub> | H(9)...H(26)    | 592.5(109) | 72.6(fixed)                             | — | -7.9  | 72.6 |
| <i>u</i> <sub>1577</sub> | H(9)...H(62)    | 592.6(41)  | 38.0(fixed)                             | — | -5.4  | 38.0 |
| <i>u</i> <sub>1651</sub> | C(27)...H(61)   | 592.9(14)  | 17.5(fixed)                             | — | -8.0  | 17.5 |
| <i>u</i> <sub>1753</sub> | C(131)...C(163) | 593.2(126) | 37.4(tied to <i>u</i> <sub>1288</sub> ) | — | -0.6  | 34.8 |
| <i>u</i> <sub>1558</sub> | H(72)...H(87)   | 593.8(95)  | 59.4(fixed)                             | — | -2.8  | 59.4 |
| <i>u</i> <sub>1731</sub> | H(26)...H(61)   | 593.9(42)  | 43.0(fixed)                             | — | -12.2 | 43.0 |
| <i>u</i> <sub>1719</sub> | H(91)...H(123)  | 594.5(43)  | 33.2(fixed)                             | — | -5.0  | 33.2 |
| <i>u</i> <sub>1834</sub> | C(11)...H(30)   | 594.9(85)  | 47.7(fixed)                             | — | -10.6 | 47.7 |
| <i>u</i> <sub>1585</sub> | H(82)...C(117)  | 595.2(40)  | 41.7(fixed)                             | — | 4.0   | 41.7 |
| <i>u</i> <sub>1773</sub> | C(7)...H(58)    | 595.2(60)  | 39.8(fixed)                             | — | -6.2  | 39.8 |
| <i>u</i> <sub>1653</sub> | H(144)...H(173) | 595.6(68)  | 41.8(fixed)                             | — | 8.3   | 41.8 |
| <i>u</i> <sub>1640</sub> | H(28)...H(60)   | 595.6(34)  | 38.5(fixed)                             | — | -8.2  | 38.5 |
| <i>u</i> <sub>1822</sub> | H(79)...H(87)   | 595.9(47)  | 49.0(fixed)                             | — | -2.7  | 49.0 |
| <i>u</i> <sub>1702</sub> | H(141)...H(154) | 596.0(96)  | 60.5(fixed)                             | — | 2.4   | 60.5 |
| <i>u</i> <sub>1675</sub> | H(28)...H(62)   | 596.1(31)  | 35.0(fixed)                             | — | -9.3  | 35.0 |
| <i>u</i> <sub>1687</sub> | H(150)...H(185) | 596.2(40)  | 41.7(fixed)                             | — | -17.0 | 41.7 |
| <i>u</i> <sub>1783</sub> | H(13)...H(57)   | 596.2(72)  | 47.8(fixed)                             | — | -3.4  | 47.8 |
| <i>u</i> <sub>1620</sub> | H(70)...C(81)   | 596.2(78)  | 48.1(fixed)                             | — | 2.4   | 48.1 |
| <i>u</i> <sub>1842</sub> | C(11)...H(28)   | 596.3(84)  | 56.4(fixed)                             | — | -11.0 | 56.4 |
| <i>u</i> <sub>1796</sub> | H(146)...H(181) | 596.6(77)  | 54.8(fixed)                             | — | 2.6   | 54.8 |
| <i>u</i> <sub>1646</sub> | H(18)...H(25)   | 596.6(59)  | 52.8(fixed)                             | — | 10.3  | 52.8 |
| <i>u</i> <sub>1705</sub> | C(139)...C(151) | 596.7(65)  | 36.6(tied to <i>u</i> <sub>1727</sub> ) | — | -2.7  | 30.4 |
| <i>u</i> <sub>1592</sub> | H(133)...H(186) | 596.9(43)  | 39.9(fixed)                             | — | -3.5  | 39.9 |
| <i>u</i> <sub>1494</sub> | C(15)...C(51)   | 597.1(94)  | 48.3(tied to <i>u</i> <sub>1288</sub> ) | — | -2.0  | 45.0 |
| <i>u</i> <sub>1689</sub> | H(70)...H(82)   | 597.1(102) | 53.4(fixed)                             | — | 5.5   | 53.4 |
| <i>u</i> <sub>1603</sub> | H(71)...H(124)  | 597.3(35)  | 33.0(fixed)                             | — | -5.9  | 33.0 |
| <i>u</i> <sub>1656</sub> | H(137)...H(146) | 597.4(80)  | 51.4(fixed)                             | — | 5.6   | 51.4 |
| <i>u</i> <sub>1626</sub> | H(91)...H(115)  | 597.4(261) | 64.4(fixed)                             | — | -15.3 | 64.4 |
| <i>u</i> <sub>1768</sub> | C(77)...C(89)   | 597.6(52)  | 38.2(tied to <i>u</i> <sub>1727</sub> ) | — | -5.2  | 31.7 |
| <i>u</i> <sub>1707</sub> | H(75)...H(84)   | 597.9(72)  | 46.1(fixed)                             | — | 3.8   | 46.1 |
| <i>u</i> <sub>1563</sub> | Si(4)...H(52)   | 598.1(56)  | 43.8(fixed)                             | — | -0.8  | 43.8 |

|                          |                   |            |                                         |          |       |      |
|--------------------------|-------------------|------------|-----------------------------------------|----------|-------|------|
| <i>u</i> <sub>1678</sub> | H(17)...H(29)     | 598.2(80)  | 66.8(fixed)                             | —        | 8.6   | 66.8 |
| <i>u</i> <sub>1814</sub> | H(144)...H(182)   | 598.2(86)  | 47.8(fixed)                             | —        | -4.8  | 47.8 |
| <i>u</i> <sub>1793</sub> | H(138)...C(143)   | 598.9(80)  | 50.3(fixed)                             | —        | -3.1  | 50.3 |
| <i>u</i> <sub>1770</sub> | C(69)...C(113)    | 598.9(128) | 47.2(tied to <i>u</i> <sub>1727</sub> ) | —        | 0.1   | 39.2 |
| <i>u</i> <sub>1739</sub> | H(71)...H(90)     | 598.9(99)  | 63.7(fixed)                             | —        | -8.6  | 63.7 |
| <i>u</i> <sub>1495</sub> | H(92)...H(119)    | 599.0(79)  | 54.0(fixed)                             | —        | 8.0   | 54.0 |
| <i>u</i> <sub>1663</sub> | H(141)...H(149)   | 599.2(69)  | 48.6(fixed)                             | —        | 2.2   | 48.6 |
| <i>u</i> <sub>1623</sub> | H(132)...H(145)   | 599.3(74)  | 45.3(fixed)                             | —        | 2.2   | 45.3 |
| <i>u</i> <sub>1481</sub> | H(17)...H(52)     | 599.6(115) | 62.1(fixed)                             | —        | 4.7   | 62.1 |
| <i>u</i> <sub>1591</sub> | H(70)...H(86)     | 599.8(93)  | 68.2(fixed)                             | —        | -7.1  | 68.2 |
| <i>u</i> <sub>1512</sub> | H(82)...C(109)    | 599.9(89)  | 53.0(fixed)                             | —        | 9.0   | 53.0 |
| <i>u</i> <sub>1766</sub> | H(21)...C(55)     | 599.9(52)  | 48.4(fixed)                             | —        | 0.1   | 48.4 |
| <i>u</i> <sub>1535</sub> | H(134)...H(168)   | 600.1(98)  | 73.1(fixed)                             | —        | 10.3  | 73.1 |
| <i>u</i> <sub>1750</sub> | H(181)...H(186)   | 600.3(44)  | 33.3(fixed)                             | —        | -6.7  | 33.3 |
| <i>u</i> <sub>1660</sub> | H(132)...H(184)   | 600.4(40)  | 36.4(fixed)                             | —        | -4.7  | 36.4 |
| <i>u</i> <sub>1551</sub> | Si(3)...H(52)     | 600.4(75)  | 62.2(fixed)                             | —        | -4.3  | 62.2 |
| <i>u</i> <sub>1732</sub> | H(18)...H(60)     | 600.5(32)  | 41.0(fixed)                             | —        | -13.7 | 41.0 |
| <i>u</i> <sub>1417</sub> | C(85)...H(116)    | 600.5(87)  | 54.0(fixed)                             | —        | 13.2  | 54.0 |
| <i>u</i> <sub>1764</sub> | H(72)...H(122)    | 600.6(33)  | 30.8(fixed)                             | —        | -6.6  | 30.8 |
| <i>u</i> <sub>1575</sub> | H(10)...H(50)     | 600.7(74)  | 63.0(fixed)                             | —        | 14.1  | 63.0 |
| <i>u</i> <sub>1820</sub> | C(73)...C(105)    | 600.7(70)  | 57.3(tied to <i>u</i> <sub>1727</sub> ) | —        | -0.5  | 47.6 |
| <i>u</i> <sub>1595</sub> | H(82)...H(107)    | 600.8(239) | 51.5(fixed)                             | —        | -0.4  | 51.5 |
| <i>u</i> <sub>1673</sub> | H(9)...H(61)      | 600.8(31)  | 35.0(fixed)                             | —        | -6.1  | 35.0 |
| <i>u</i> <sub>1685</sub> | H(134)...C(143)   | 600.8(77)  | 50.5(fixed)                             | —        | -2.5  | 50.5 |
| <i>u</i> <sub>1792</sub> | H(80)...H(91)     | 601.9(82)  | 53.5(fixed)                             | —        | 3.7   | 53.5 |
| <i>u</i> <sub>1699</sub> | H(142)...H(153)   | 601.9(97)  | 50.7(fixed)                             | —        | 4.3   | 50.7 |
| <i>u</i> <sub>1700</sub> | C(19)...H(58)     | 602.0(46)  | 37.1(fixed)                             | —        | 3.8   | 37.1 |
| <i>u</i> <sub>1754</sub> | C(7)...C(19)      | 602.0(51)  | 39.3(tied to <i>u</i> <sub>1727</sub> ) | —        | -7.5  | 32.6 |
| <i>u</i> <sub>1810</sub> | C(135)...H(152)   | 602.0(86)  | 41.9(fixed)                             | —        | -6.4  | 41.9 |
| <i>u</i> <sub>1693</sub> | H(76)...H(83)     | 602.2(84)  | 56.8(fixed)                             | —        | 2.6   | 56.8 |
| <i>u</i> <sub>1698</sub> | H(141)...C(151)   | 602.8(74)  | 43.8(fixed)                             | —        | -0.2  | 43.8 |
| <i>u</i> <sub>1530</sub> | H(136)...H(165)   | 602.9(144) | 65.6(fixed)                             | —        | 6.0   | 65.6 |
| <i>u</i> <sub>1798</sub> | H(136)...C(151)   | 603.1(95)  | 40.1(fixed)                             | —        | -5.7  | 40.1 |
| <i>u</i> <sub>1677</sub> | H(152)...H(184)   | 603.1(35)  | 38.5(fixed)                             | —        | -3.5  | 38.5 |
| <i>u</i> <sub>1715</sub> | Si(127)...Si(130) | 603.4(12)  | 20.8(tied to <i>u</i> <sub>1727</sub> ) | —        | -2.5  | 17.3 |
| <i>u</i> <sub>1755</sub> | H(154)...H(185)   | 603.5(31)  | 32.2(fixed)                             | —        | -7.1  | 32.2 |
| <i>u</i> <sub>1901</sub> | H(12)...C(27)     | 603.8(93)  | 57.8(fixed)                             | —        | -10.5 | 57.8 |
| <i>u</i> <sub>1727</sub> | Si(3)...Si(5)     | 603.9(24)  | 18.9(10)                                | 15.7(16) | -2.3  | 15.7 |
| <i>u</i> <sub>1650</sub> | H(79)...H(110)    | 604.3(124) | 69.5(fixed)                             | —        | 19.1  | 69.5 |
| <i>u</i> <sub>1548</sub> | H(70)...H(88)     | 604.4(104) | 71.7(fixed)                             | —        | 0.2   | 71.7 |
| <i>u</i> <sub>1763</sub> | H(79)...H(91)     | 604.4(60)  | 50.6(fixed)                             | —        | -0.5  | 50.6 |
| <i>u</i> <sub>1666</sub> | H(91)...H(119)    | 604.6(77)  | 61.3(fixed)                             | —        | 4.5   | 61.3 |
| <i>u</i> <sub>1827</sub> | H(149)...H(182)   | 604.7(93)  | 70.5(fixed)                             | —        | 3.2   | 70.5 |
| <i>u</i> <sub>1813</sub> | H(8)...H(20)      | 604.9(76)  | 56.4(fixed)                             | —        | -3.0  | 56.4 |
| <i>u</i> <sub>1864</sub> | H(133)...H(166)   | 604.9(160) | 59.9(fixed)                             | —        | -0.2  | 59.9 |
| <i>u</i> <sub>1674</sub> | H(90)...H(122)    | 605.0(27)  | 32.6(fixed)                             | —        | -6.1  | 32.6 |

|                          |                  |            |                                         |   |       |      |
|--------------------------|------------------|------------|-----------------------------------------|---|-------|------|
| <i>u</i> <sub>1648</sub> | H(74)...H(122)   | 605.2(41)  | 37.9(fixed)                             | — | -9.5  | 37.9 |
| <i>u</i> <sub>1534</sub> | H(82)...H(111)   | 605.2(52)  | 64.4(fixed)                             | — | 11.8  | 64.4 |
| <i>u</i> <sub>1688</sub> | H(75)...H(83)    | 605.3(67)  | 45.4(fixed)                             | — | 0.8   | 45.4 |
| <i>u</i> <sub>1641</sub> | H(152)...H(186)  | 605.4(30)  | 40.7(fixed)                             | — | -3.7  | 40.7 |
| <i>u</i> <sub>1287</sub> | H(78)...H(103)   | 605.9(167) | 81.2(fixed)                             | — | 16.3  | 81.2 |
| <i>u</i> <sub>1825</sub> | H(70)...H(114)   | 606.2(156) | 67.8(fixed)                             | — | 5.2   | 67.8 |
| <i>u</i> <sub>1819</sub> | H(76)...H(106)   | 606.6(77)  | 61.5(fixed)                             | — | 2.1   | 61.5 |
| <i>u</i> <sub>1704</sub> | H(17)...H(50)    | 606.7(96)  | 64.9(fixed)                             | — | 6.7   | 64.9 |
| <i>u</i> <sub>1564</sub> | H(92)...C(117)   | 606.8(54)  | 45.2(fixed)                             | — | 4.7   | 45.2 |
| <i>u</i> <sub>1720</sub> | H(8)...H(60)     | 607.0(36)  | 33.9(fixed)                             | — | -4.6  | 33.9 |
| <i>u</i> <sub>1716</sub> | Si(65)...H(116)  | 607.6(121) | 49.0(fixed)                             | — | 3.3   | 49.0 |
| <i>u</i> <sub>1801</sub> | H(75)...H(82)    | 607.9(67)  | 42.8(fixed)                             | — | 0.1   | 42.8 |
| <i>u</i> <sub>1808</sub> | C(139)...H(154)  | 608.1(86)  | 49.1(fixed)                             | — | -2.7  | 49.1 |
| <i>u</i> <sub>1830</sub> | H(8)...C(55)     | 608.6(56)  | 38.4(fixed)                             | — | -7.3  | 38.4 |
| <i>u</i> <sub>1624</sub> | H(30)...C(55)    | 608.6(44)  | 51.2(fixed)                             | — | 5.8   | 51.2 |
| <i>u</i> <sub>1818</sub> | H(22)...H(54)    | 608.9(129) | 67.7(fixed)                             | — | 3.2   | 67.7 |
| <i>u</i> <sub>1725</sub> | H(13)...H(44)    | 608.9(80)  | 57.0(fixed)                             | — | 12.5  | 57.0 |
| <i>u</i> <sub>1723</sub> | C(69)...H(86)    | 609.0(79)  | 55.1(fixed)                             | — | -9.6  | 55.1 |
| <i>u</i> <sub>1840</sub> | H(145)...C(179)  | 609.3(72)  | 40.5(fixed)                             | — | -6.6  | 40.5 |
| <i>u</i> <sub>1742</sub> | H(17)...H(25)    | 609.6(53)  | 49.4(fixed)                             | — | 4.5   | 49.4 |
| <i>u</i> <sub>1815</sub> | H(140)...H(148)  | 609.8(61)  | 56.4(fixed)                             | — | -1.6  | 56.4 |
| <i>u</i> <sub>1743</sub> | H(133)...H(185)  | 610.2(29)  | 38.6(fixed)                             | — | -7.2  | 38.6 |
| <i>u</i> <sub>1756</sub> | Si(66)...C(101)  | 610.8(72)  | 38.7(tied to <i>u</i> <sub>1727</sub> ) | — | -1.8  | 32.1 |
| <i>u</i> <sub>1797</sub> | H(16)...C(23)    | 611.0(40)  | 33.5(fixed)                             | — | -0.3  | 33.5 |
| <i>u</i> <sub>1765</sub> | C(19)...C(55)    | 611.0(36)  | 33.5(tied to <i>u</i> <sub>1727</sub> ) | — | -0.5  | 27.8 |
| <i>u</i> <sub>1710</sub> | H(132)...H(168)  | 611.2(91)  | 58.1(fixed)                             | — | 10.3  | 58.1 |
| <i>u</i> <sub>1839</sub> | C(147)...C(179)  | 611.3(46)  | 37.0(tied to <i>u</i> <sub>1727</sub> ) | — | -3.5  | 30.7 |
| <i>u</i> <sub>1790</sub> | H(76)...C(117)   | 611.3(55)  | 33.9(fixed)                             | — | -5.6  | 33.9 |
| <i>u</i> <sub>1737</sub> | H(30)...H(61)    | 612.1(32)  | 36.0(fixed)                             | — | -5.4  | 36.0 |
| <i>u</i> <sub>1777</sub> | Si(3)...H(42)    | 612.1(51)  | 41.6(fixed)                             | — | 4.3   | 41.6 |
| <i>u</i> <sub>1758</sub> | H(8)...H(22)     | 612.5(81)  | 57.5(fixed)                             | — | 1.7   | 57.5 |
| <i>u</i> <sub>1800</sub> | H(10)...H(60)    | 613.0(27)  | 31.3(fixed)                             | — | -6.4  | 31.3 |
| <i>u</i> <sub>1771</sub> | H(10)...H(48)    | 613.1(88)  | 57.4(fixed)                             | — | 7.9   | 57.4 |
| <i>u</i> <sub>1829</sub> | H(149)...C(179)  | 613.2(75)  | 41.5(fixed)                             | — | 1.2   | 41.5 |
| <i>u</i> <sub>1782</sub> | H(134)...H(184)  | 613.3(29)  | 34.1(fixed)                             | — | -7.5  | 34.1 |
| <i>u</i> <sub>1426</sub> | C(77)...H(103)   | 613.6(146) | 62.3(fixed)                             | — | 12.6  | 62.3 |
| <i>u</i> <sub>1828</sub> | C(143)...C(171)  | 613.6(84)  | 40.2(tied to <i>u</i> <sub>1727</sub> ) | — | 0.2   | 33.4 |
| <i>u</i> <sub>1967</sub> | H(70)...H(112)   | 613.8(99)  | 81.7(fixed)                             | — | 0.7   | 81.7 |
| <i>u</i> <sub>1857</sub> | H(9)...C(55)     | 613.8(64)  | 42.4(fixed)                             | — | -7.1  | 42.4 |
| <i>u</i> <sub>1869</sub> | H(137)...H(181)  | 614.2(68)  | 54.6(fixed)                             | — | -3.2  | 54.6 |
| <i>u</i> <sub>1784</sub> | H(153)...H(185)  | 614.2(31)  | 31.9(fixed)                             | — | -7.3  | 31.9 |
| <i>u</i> <sub>1852</sub> | Si(127)...C(155) | 614.4(81)  | 38.7(tied to <i>u</i> <sub>1727</sub> ) | — | -3.5  | 32.1 |
| <i>u</i> <sub>1817</sub> | H(80)...H(106)   | 614.4(169) | 64.3(fixed)                             | — | 0.5   | 64.3 |
| <i>u</i> <sub>1746</sub> | H(84)...H(123)   | 614.7(36)  | 39.5(fixed)                             | — | -12.0 | 39.5 |
| <i>u</i> <sub>1823</sub> | H(72)...H(114)   | 614.8(147) | 60.7(fixed)                             | — | 4.8   | 60.7 |
| <i>u</i> <sub>1682</sub> | H(9)...H(53)     | 615.1(138) | 86.6(fixed)                             | — | -13.7 | 86.6 |

|                          |                  |            |                                         |   |       |      |
|--------------------------|------------------|------------|-----------------------------------------|---|-------|------|
| <i>u</i> <sub>1900</sub> | C(143)...H(182)  | 615.5(61)  | 45.7(fixed)                             | — | -8.9  | 45.7 |
| <i>u</i> <sub>1757</sub> | H(8)...H(21)     | 615.7(68)  | 51.8(fixed)                             | — | -2.6  | 51.8 |
| <i>u</i> <sub>1799</sub> | H(29)...H(61)    | 615.7(29)  | 34.8(fixed)                             | — | -7.1  | 34.8 |
| <i>u</i> <sub>1870</sub> | H(10)...C(19)    | 615.7(70)  | 55.3(fixed)                             | — | -8.7  | 55.3 |
| <i>u</i> <sub>1795</sub> | H(13)...H(20)    | 616.2(62)  | 52.1(fixed)                             | — | -4.8  | 52.1 |
| <i>u</i> <sub>1844</sub> | H(134)...H(161)  | 616.2(83)  | 82.7(fixed)                             | — | 13.3  | 82.7 |
| <i>u</i> <sub>1733</sub> | H(22)...H(53)    | 616.5(88)  | 70.8(fixed)                             | — | 7.8   | 70.8 |
| <i>u</i> <sub>1774</sub> | Si(128)...H(157) | 616.6(55)  | 58.7(fixed)                             | — | 4.4   | 58.7 |
| <i>u</i> <sub>1838</sub> | Si(4)...C(43)    | 617.2(72)  | 42.6(tied to <i>u</i> <sub>1727</sub> ) | — | -3.1  | 35.4 |
| <i>u</i> <sub>1711</sub> | H(14)...H(44)    | 618.3(54)  | 56.8(fixed)                             | — | 12.4  | 56.8 |
| <i>u</i> <sub>1552</sub> | H(18)...H(54)    | 618.7(141) | 76.2(fixed)                             | — | 3.6   | 76.2 |
| <i>u</i> <sub>1860</sub> | C(15)...C(27)    | 618.9(55)  | 46.6(tied to <i>u</i> <sub>1727</sub> ) | — | -4.3  | 38.7 |
| <i>u</i> <sub>1629</sub> | H(153)...H(178)  | 618.9(193) | 44.9(fixed)                             | — | 0.3   | 44.9 |
| <i>u</i> <sub>1916</sub> | C(147)...H(182)  | 619.4(66)  | 60.7(fixed)                             | — | -4.6  | 60.7 |
| <i>u</i> <sub>1791</sub> | H(70)...H(122)   | 619.5(27)  | 29.3(fixed)                             | — | -6.5  | 29.3 |
| <i>u</i> <sub>1846</sub> | Si(65)...H(95)   | 620.0(55)  | 47.7(fixed)                             | — | 3.4   | 47.7 |
| <i>u</i> <sub>1802</sub> | Si(127)...H(146) | 620.0(30)  | 19.7(fixed)                             | — | -5.3  | 19.7 |
| <i>u</i> <sub>1642</sub> | H(17)...H(53)    | 620.0(101) | 51.3(fixed)                             | — | 0.2   | 51.3 |
| <i>u</i> <sub>2001</sub> | H(71)...H(110)   | 620.3(130) | 86.7(fixed)                             | — | 1.3   | 86.7 |
| <i>u</i> <sub>1837</sub> | Si(66)...H(80)   | 621.0(24)  | 19.8(fixed)                             | — | -6.5  | 19.8 |
| <i>u</i> <sub>1841</sub> | H(140)...C(147)  | 621.1(41)  | 31.0(fixed)                             | — | -4.2  | 31.0 |
| <i>u</i> <sub>1714</sub> | H(134)...C(167)  | 621.1(78)  | 70.5(fixed)                             | — | 7.8   | 70.5 |
| <i>u</i> <sub>1866</sub> | H(132)...H(169)  | 621.2(102) | 81.8(fixed)                             | — | 3.3   | 81.8 |
| <i>u</i> <sub>1724</sub> | C(89)...H(119)   | 621.2(60)  | 40.2(fixed)                             | — | 1.7   | 40.2 |
| <i>u</i> <sub>1824</sub> | Si(3)...H(22)    | 621.2(27)  | 22.5(fixed)                             | — | -8.0  | 22.5 |
| <i>u</i> <sub>1804</sub> | Si(128)...H(142) | 621.3(32)  | 19.9(fixed)                             | — | -5.4  | 19.9 |
| <i>u</i> <sub>1809</sub> | H(92)...H(123)   | 621.5(26)  | 30.1(fixed)                             | — | -6.9  | 30.1 |
| <i>u</i> <sub>1721</sub> | Si(127)...H(161) | 621.7(75)  | 53.8(fixed)                             | — | 2.5   | 53.8 |
| <i>u</i> <sub>1775</sub> | H(72)...C(85)    | 622.0(71)  | 50.7(fixed)                             | — | -9.0  | 50.7 |
| <i>u</i> <sub>1811</sub> | H(134)...H(144)  | 622.7(91)  | 56.4(fixed)                             | — | 0.6   | 56.4 |
| <i>u</i> <sub>1891</sub> | H(137)...C(179)  | 623.1(47)  | 38.6(fixed)                             | — | -7.0  | 38.6 |
| <i>u</i> <sub>1893</sub> | Si(65)...H(110)  | 623.3(84)  | 49.1(fixed)                             | — | 1.3   | 49.1 |
| <i>u</i> <sub>1607</sub> | H(138)...H(164)  | 623.4(136) | 79.9(fixed)                             | — | 6.8   | 79.9 |
| <i>u</i> <sub>1751</sub> | H(136)...C(163)  | 623.5(126) | 53.7(fixed)                             | — | 1.8   | 53.7 |
| <i>u</i> <sub>1972</sub> | C(11)...H(45)    | 623.5(110) | 73.1(fixed)                             | — | -2.5  | 73.1 |
| <i>u</i> <sub>1920</sub> | H(21)...H(54)    | 623.9(115) | 61.8(fixed)                             | — | -4.1  | 61.8 |
| <i>u</i> <sub>1821</sub> | C(81)...C(117)   | 624.3(33)  | 30.3(tied to <i>u</i> <sub>1727</sub> ) | — | -1.9  | 25.2 |
| <i>u</i> <sub>1906</sub> | H(21)...H(53)    | 624.9(100) | 69.7(fixed)                             | — | -4.4  | 69.7 |
| <i>u</i> <sub>1876</sub> | H(142)...H(184)  | 625.0(30)  | 33.9(fixed)                             | — | -13.9 | 33.9 |
| <i>u</i> <sub>1968</sub> | H(74)...H(107)   | 625.0(96)  | 68.9(fixed)                             | — | 0.3   | 68.9 |
| <i>u</i> <sub>1616</sub> | C(77)...C(101)   | 625.1(132) | 47.2(tied to <i>u</i> <sub>1288</sub> ) | — | 6.7   | 43.9 |
| <i>u</i> <sub>1832</sub> | H(137)...H(144)  | 625.2(64)  | 46.9(fixed)                             | — | -0.5  | 46.9 |
| <i>u</i> <sub>1845</sub> | H(138)...C(179)  | 625.3(42)  | 41.8(fixed)                             | — | -6.0  | 41.8 |
| <i>u</i> <sub>1882</sub> | C(77)...H(92)    | 625.5(72)  | 52.5(fixed)                             | — | -6.6  | 52.5 |
| <i>u</i> <sub>1730</sub> | H(150)...H(178)  | 626.0(105) | 51.3(fixed)                             | — | 9.8   | 51.3 |
| <i>u</i> <sub>2007</sub> | H(79)...H(86)    | 626.1(57)  | 59.9(fixed)                             | — | -7.7  | 59.9 |

|                          |                  |            |                                         |   |      |      |
|--------------------------|------------------|------------|-----------------------------------------|---|------|------|
| <i>u</i> <sub>1856</sub> | H(78)...H(107)   | 626.2(116) | 69.2(fixed)                             | — | -4.5 | 69.2 |
| <i>u</i> <sub>1812</sub> | C(73)...H(83)    | 626.6(53)  | 35.5(fixed)                             | — | -2.0 | 35.5 |
| <i>u</i> <sub>1902</sub> | C(7)...H(59)     | 626.8(65)  | 40.0(fixed)                             | — | -6.6 | 40.0 |
| <i>u</i> <sub>1803</sub> | Si(127)...H(168) | 627.0(48)  | 37.7(fixed)                             | — | 3.2  | 37.7 |
| <i>u</i> <sub>1855</sub> | Si(4)...H(18)    | 627.1(25)  | 20.3(fixed)                             | — | -6.8 | 20.3 |
| <i>u</i> <sub>1965</sub> | H(13)...H(58)    | 627.3(75)  | 56.4(fixed)                             | — | -6.2 | 56.4 |
| <i>u</i> <sub>1769</sub> | Si(128)...H(166) | 627.4(48)  | 43.8(fixed)                             | — | 3.2  | 43.8 |
| <i>u</i> <sub>1859</sub> | C(11)...C(43)    | 627.5(64)  | 53.9(tied to <i>u</i> <sub>1727</sub> ) | — | 2.0  | 44.8 |
| <i>u</i> <sub>1836</sub> | C(131)...H(144)  | 627.5(65)  | 30.1(fixed)                             | — | -2.1 | 30.1 |
| <i>u</i> <sub>1888</sub> | H(75)...C(117)   | 627.9(58)  | 31.9(fixed)                             | — | -7.1 | 31.9 |
| <i>u</i> <sub>1789</sub> | C(89)...C(117)   | 628.1(39)  | 35.1(tied to <i>u</i> <sub>1727</sub> ) | — | -1.6 | 29.2 |
| <i>u</i> <sub>1826</sub> | H(91)...C(117)   | 628.1(60)  | 51.2(fixed)                             | — | -1.3 | 51.2 |
| <i>u</i> <sub>1787</sub> | H(71)...C(85)    | 628.4(87)  | 49.2(fixed)                             | — | -6.5 | 49.2 |
| <i>u</i> <sub>1861</sub> | Si(65)...H(84)   | 628.4(27)  | 19.6(fixed)                             | — | -7.4 | 19.6 |
| <i>u</i> <sub>1982</sub> | H(79)...C(85)    | 628.6(40)  | 36.2(fixed)                             | — | -8.3 | 36.2 |
| <i>u</i> <sub>1785</sub> | H(10)...H(49)    | 628.7(69)  | 66.4(fixed)                             | — | 9.5  | 66.4 |
| <i>u</i> <sub>1805</sub> | H(74)...H(120)   | 629.0(96)  | 48.0(fixed)                             | — | -4.0 | 48.0 |
| <i>u</i> <sub>1941</sub> | H(72)...H(115)   | 629.4(111) | 53.6(fixed)                             | — | -1.9 | 53.6 |
| <i>u</i> <sub>1936</sub> | H(76)...H(84)    | 629.5(78)  | 56.4(fixed)                             | — | -4.5 | 56.4 |
| <i>u</i> <sub>1928</sub> | C(15)...H(48)    | 629.8(104) | 65.0(fixed)                             | — | -1.7 | 65.0 |
| <i>u</i> <sub>1853</sub> | H(140)...H(153)  | 629.8(73)  | 47.1(fixed)                             | — | -1.1 | 47.1 |
| <i>u</i> <sub>1874</sub> | Si(65)...C(113)  | 630.0(86)  | 37.7(tied to <i>u</i> <sub>1727</sub> ) | — | -2.7 | 31.4 |
| <i>u</i> <sub>1883</sub> | H(83)...C(117)   | 630.2(49)  | 45.4(fixed)                             | — | -2.4 | 45.4 |
| <i>u</i> <sub>1851</sub> | Si(125)...H(136) | 630.8(19)  | 21.2(fixed)                             | — | -7.0 | 21.2 |
| <i>u</i> <sub>1973</sub> | H(78)...C(89)    | 631.0(54)  | 35.4(fixed)                             | — | -7.7 | 35.4 |
| <i>u</i> <sub>1890</sub> | Si(127)...H(178) | 631.1(51)  | 44.9(fixed)                             | — | 2.6  | 44.9 |
| <i>u</i> <sub>1863</sub> | Si(1)...H(12)    | 631.3(19)  | 19.4(fixed)                             | — | -6.8 | 19.4 |
| <i>u</i> <sub>1843</sub> | C(69)...C(81)    | 631.4(57)  | 39.2(tied to <i>u</i> <sub>1727</sub> ) | — | -3.8 | 32.6 |
| <i>u</i> <sub>1662</sub> | H(26)...H(54)    | 631.4(96)  | 82.4(fixed)                             | — | 12.2 | 82.4 |
| <i>u</i> <sub>1772</sub> | C(151)...H(176)  | 631.6(186) | 46.5(fixed)                             | — | -3.2 | 46.5 |
| <i>u</i> <sub>1966</sub> | H(18)...H(29)    | 631.8(89)  | 75.8(fixed)                             | — | 2.0  | 75.8 |
| <i>u</i> <sub>1946</sub> | H(13)...C(55)    | 632.2(53)  | 37.5(fixed)                             | — | -6.5 | 37.5 |
| <i>u</i> <sub>1873</sub> | Si(63)...H(74)   | 632.8(18)  | 18.7(fixed)                             | — | -6.8 | 18.7 |
| <i>u</i> <sub>1848</sub> | H(82)...H(120)   | 632.9(45)  | 45.0(fixed)                             | — | 1.4  | 45.0 |
| <i>u</i> <sub>1877</sub> | H(17)...H(49)    | 632.9(83)  | 51.2(fixed)                             | — | 2.2  | 51.2 |
| <i>u</i> <sub>1963</sub> | H(145)...C(171)  | 633.2(108) | 56.9(fixed)                             | — | -3.3 | 56.9 |
| <i>u</i> <sub>1831</sub> | C(27)...C(55)    | 633.2(31)  | 34.6(tied to <i>u</i> <sub>1727</sub> ) | — | -1.6 | 28.8 |
| <i>u</i> <sub>1761</sub> | Si(65)...C(101)  | 633.3(76)  | 36.7(tied to <i>u</i> <sub>1727</sub> ) | — | 0.9  | 30.5 |
| <i>u</i> <sub>1977</sub> | C(143)...H(183)  | 634.1(75)  | 41.6(fixed)                             | — | -9.1 | 41.6 |
| <i>u</i> <sub>2008</sub> | H(10)...H(20)    | 634.2(85)  | 66.9(fixed)                             | — | -7.5 | 66.9 |
| <i>u</i> <sub>1958</sub> | H(132)...H(166)  | 634.4(119) | 52.7(fixed)                             | — | -1.2 | 52.7 |
| <i>u</i> <sub>2012</sub> | C(69)...H(112)   | 634.5(82)  | 56.2(fixed)                             | — | 0.5  | 56.2 |
| <i>u</i> <sub>2016</sub> | H(70)...H(115)   | 634.5(140) | 60.8(fixed)                             | — | -5.0 | 60.8 |
| <i>u</i> <sub>1879</sub> | H(17)...C(27)    | 634.6(63)  | 43.8(fixed)                             | — | 0.8  | 43.8 |
| <i>u</i> <sub>1912</sub> | H(10)...H(33)    | 634.6(104) | 86.3(fixed)                             | — | 9.4  | 86.3 |
| <i>u</i> <sub>1849</sub> | C(131)...H(169)  | 635.3(78)  | 75.0(fixed)                             | — | 3.8  | 75.0 |



|                          |                  |            |                                         |   |       |      |
|--------------------------|------------------|------------|-----------------------------------------|---|-------|------|
| <i>u</i> <sub>1884</sub> | H(75)...H(120)   | 635.9(77)  | 42.8(fixed)                             | — | -7.5  | 42.8 |
| <i>u</i> <sub>1634</sub> | C(11)...H(54)    | 635.9(112) | 72.9(fixed)                             | — | 11.8  | 72.9 |
| <i>u</i> <sub>1947</sub> | H(148)...H(181)  | 636.0(55)  | 47.7(fixed)                             | — | -0.6  | 47.7 |
| <i>u</i> <sub>1878</sub> | C(69)...H(82)    | 636.5(78)  | 40.5(fixed)                             | — | -0.3  | 40.5 |
| <i>u</i> <sub>1915</sub> | C(15)...C(47)    | 636.5(75)  | 54.6(tied to <i>u</i> <sub>1727</sub> ) | — | -4.7  | 45.3 |
| <i>u</i> <sub>1895</sub> | H(74)...C(117)   | 636.6(67)  | 31.4(fixed)                             | — | -5.7  | 31.4 |
| <i>u</i> <sub>1850</sub> | Si(127)...C(159) | 636.8(68)  | 42.6(tied to <i>u</i> <sub>1727</sub> ) | — | -2.9  | 35.4 |
| <i>u</i> <sub>1956</sub> | H(150)...H(181)  | 636.8(61)  | 55.4(fixed)                             | — | 2.5   | 55.4 |
| <i>u</i> <sub>1854</sub> | C(131)...H(145)  | 636.9(53)  | 31.1(fixed)                             | — | -4.8  | 31.1 |
| <i>u</i> <sub>1881</sub> | H(141)...C(147)  | 637.2(52)  | 31.0(fixed)                             | — | -5.2  | 31.0 |
| <i>u</i> <sub>1816</sub> | C(131)...H(168)  | 637.3(75)  | 49.8(fixed)                             | — | 5.4   | 49.8 |
| <i>u</i> <sub>1542</sub> | H(88)...H(116)   | 637.4(93)  | 58.3(fixed)                             | — | 17.0  | 58.3 |
| <i>u</i> <sub>1983</sub> | C(7)...H(20)     | 637.7(59)  | 40.8(fixed)                             | — | -9.3  | 40.8 |
| <i>u</i> <sub>1904</sub> | Si(125)...H(150) | 638.1(10)  | 19.1(fixed)                             | — | -7.0  | 19.1 |
| <i>u</i> <sub>1935</sub> | H(132)...H(165)  | 638.2(123) | 49.9(fixed)                             | — | -1.4  | 49.9 |
| <i>u</i> <sub>1833</sub> | C(69)...H(88)    | 638.5(81)  | 51.4(fixed)                             | — | -7.8  | 51.4 |
| <i>u</i> <sub>1894</sub> | Si(63)...H(88)   | 638.5(15)  | 18.7(fixed)                             | — | -6.3  | 18.7 |
| <i>u</i> <sub>2063</sub> | H(20)...H(52)    | 638.5(153) | 76.8(fixed)                             | — | -6.0  | 76.8 |
| <i>u</i> <sub>1778</sub> | C(81)...H(108)   | 638.7(221) | 53.7(fixed)                             | — | -3.8  | 53.7 |
| <i>u</i> <sub>1922</sub> | H(17)...H(30)    | 638.8(83)  | 59.9(fixed)                             | — | 2.6   | 59.9 |
| <i>u</i> <sub>1885</sub> | H(142)...C(147)  | 638.9(62)  | 31.7(fixed)                             | — | -4.6  | 31.7 |
| <i>u</i> <sub>1872</sub> | H(18)...H(24)    | 638.9(76)  | 59.0(fixed)                             | — | 0.7   | 59.0 |
| <i>u</i> <sub>1899</sub> | Si(4)...H(59)    | 639.1(19)  | 18.3(fixed)                             | — | -5.5  | 18.3 |
| <i>u</i> <sub>1919</sub> | Si(128)...C(171) | 639.3(37)  | 27.7(tied to <i>u</i> <sub>1727</sub> ) | — | -1.5  | 23.0 |
| <i>u</i> <sub>1862</sub> | H(30)...H(57)    | 639.8(38)  | 52.0(fixed)                             | — | 3.2   | 52.0 |
| <i>u</i> <sub>1908</sub> | H(17)...C(23)    | 639.9(41)  | 31.6(fixed)                             | — | -2.7  | 31.6 |
| <i>u</i> <sub>1943</sub> | C(73)...H(82)    | 639.9(45)  | 30.0(fixed)                             | — | -4.7  | 30.0 |
| <i>u</i> <sub>1909</sub> | Si(1)...H(26)    | 640.2(9)   | 19.9(fixed)                             | — | -9.6  | 19.9 |
| <i>u</i> <sub>1937</sub> | H(17)...H(24)    | 640.3(52)  | 51.9(fixed)                             | — | -3.8  | 51.9 |
| <i>u</i> <sub>1897</sub> | H(78)...H(106)   | 640.3(119) | 59.5(fixed)                             | — | -4.9  | 59.5 |
| <i>u</i> <sub>1991</sub> | Si(65)...C(109)  | 640.4(53)  | 39.3(tied to <i>u</i> <sub>1727</sub> ) | — | -3.5  | 32.6 |
| <i>u</i> <sub>1835</sub> | H(82)...H(119)   | 640.5(57)  | 44.0(fixed)                             | — | 2.4   | 44.0 |
| <i>u</i> <sub>1986</sub> | C(15)...H(30)    | 640.6(73)  | 52.4(fixed)                             | — | -5.4  | 52.4 |
| <i>u</i> <sub>1690</sub> | H(16)...H(54)    | 640.8(118) | 61.7(fixed)                             | — | -1.5  | 61.7 |
| <i>u</i> <sub>1984</sub> | H(76)...H(82)    | 641.2(61)  | 48.1(fixed)                             | — | -5.7  | 48.1 |
| <i>u</i> <sub>1978</sub> | H(12)...C(55)    | 641.2(63)  | 35.8(fixed)                             | — | -6.1  | 35.8 |
| <i>u</i> <sub>1726</sub> | Si(65)...H(103)  | 641.5(89)  | 52.8(fixed)                             | — | 2.5   | 52.8 |
| <i>u</i> <sub>1960</sub> | H(80)...C(105)   | 641.9(136) | 50.9(fixed)                             | — | -1.8  | 50.9 |
| <i>u</i> <sub>2046</sub> | H(138)...H(154)  | 641.9(75)  | 43.0(fixed)                             | — | -10.1 | 43.0 |
| <i>u</i> <sub>2018</sub> | H(12)...H(58)    | 642.0(80)  | 55.6(fixed)                             | — | -7.5  | 55.6 |
| <i>u</i> <sub>1683</sub> | H(13)...H(54)    | 642.0(116) | 79.9(fixed)                             | — | 16.9  | 79.9 |
| <i>u</i> <sub>1969</sub> | H(80)...C(85)    | 642.1(57)  | 36.2(fixed)                             | — | -5.2  | 36.2 |
| <i>u</i> <sub>1975</sub> | H(83)...H(120)   | 642.1(64)  | 51.3(fixed)                             | — | -0.6  | 51.3 |
| <i>u</i> <sub>1962</sub> | H(138)...H(181)  | 642.2(55)  | 50.1(fixed)                             | — | -8.0  | 50.1 |
| <i>u</i> <sub>2020</sub> | H(146)...C(179)  | 642.3(60)  | 38.9(fixed)                             | — | -7.9  | 38.9 |
| <i>u</i> <sub>1939</sub> | H(79)...C(89)    | 642.5(45)  | 37.1(fixed)                             | — | -6.1  | 37.1 |

|                          |                  |            |                                         |   |       |       |
|--------------------------|------------------|------------|-----------------------------------------|---|-------|-------|
| <i>u</i> <sub>1929</sub> | Si(3)...H(33)    | 642.8(50)  | 50.9(fixed)                             | — | 3.5   | 50.9  |
| <i>u</i> <sub>1903</sub> | Si(66)...H(121)  | 643.0(17)  | 18.0(fixed)                             | — | -5.2  | 18.0  |
| <i>u</i> <sub>1994</sub> | H(133)...C(163)  | 643.2(145) | 42.6(fixed)                             | — | -1.9  | 42.6  |
| <i>u</i> <sub>1957</sub> | C(73)...H(84)    | 643.5(52)  | 32.7(fixed)                             | — | -4.6  | 32.7  |
| <i>u</i> <sub>1930</sub> | C(7)...C(47)     | 644.0(58)  | 54.6(tied to <i>u</i> <sub>1727</sub> ) | — | -3.9  | 45.4  |
| <i>u</i> <sub>1695</sub> | H(25)...C(51)    | 644.1(155) | 94.0(fixed)                             | — | 5.7   | 94.0  |
| <i>u</i> <sub>1925</sub> | C(11)...H(22)    | 644.5(61)  | 42.4(fixed)                             | — | -7.3  | 42.4  |
| <i>u</i> <sub>1932</sub> | C(7)...H(21)     | 645.1(48)  | 35.8(fixed)                             | — | -9.6  | 35.8  |
| <i>u</i> <sub>1905</sub> | H(72)...H(82)    | 645.1(92)  | 59.3(fixed)                             | — | 1.4   | 59.3  |
| <i>u</i> <sub>1880</sub> | H(29)...C(55)    | 645.4(50)  | 47.0(fixed)                             | — | -1.7  | 47.0  |
| <i>u</i> <sub>1945</sub> | H(142)...H(148)  | 645.6(84)  | 53.7(fixed)                             | — | -5.9  | 53.7  |
| <i>u</i> <sub>1913</sub> | H(18)...C(23)    | 645.6(52)  | 34.2(fixed)                             | — | -0.5  | 34.2  |
| <i>u</i> <sub>1868</sub> | C(81)...H(107)   | 645.7(205) | 44.1(fixed)                             | — | -7.0  | 44.1  |
| <i>u</i> <sub>1944</sub> | Si(3)...C(47)    | 646.0(30)  | 30.5(tied to <i>u</i> <sub>1727</sub> ) | — | -6.2  | 25.4  |
| <i>u</i> <sub>1996</sub> | H(16)...H(29)    | 646.2(65)  | 60.6(fixed)                             | — | -4.1  | 60.6  |
| <i>u</i> <sub>1892</sub> | C(131)...H(146)  | 646.4(68)  | 32.9(fixed)                             | — | -3.0  | 32.9  |
| <i>u</i> <sub>1918</sub> | H(20)...H(49)    | 647.0(45)  | 76.9(fixed)                             | — | 16.5  | 76.9  |
| <i>u</i> <sub>1788</sub> | C(23)...C(51)    | 647.5(102) | 79.0(tied to <i>u</i> <sub>1727</sub> ) | — | 0.4   | 65.7  |
| <i>u</i> <sub>2109</sub> | H(78)...H(88)    | 647.9(60)  | 52.6(fixed)                             | — | -10.1 | 52.6  |
| <i>u</i> <sub>1776</sub> | H(24)...H(54)    | 647.9(101) | 81.0(fixed)                             | — | 5.0   | 81.0  |
| <i>u</i> <sub>1985</sub> | C(143)...H(174)  | 648.2(92)  | 41.6(fixed)                             | — | 1.0   | 41.6  |
| <i>u</i> <sub>2019</sub> | H(80)...H(86)    | 648.2(81)  | 63.3(fixed)                             | — | -6.4  | 63.3  |
| <i>u</i> <sub>1970</sub> | H(136)...C(179)  | 648.4(47)  | 44.5(fixed)                             | — | -6.5  | 44.5  |
| <i>u</i> <sub>2183</sub> | H(70)...H(111)   | 648.8(90)  | 79.7(fixed)                             | — | -10.3 | 79.7  |
| <i>u</i> <sub>1921</sub> | Si(127)...H(169) | 649.1(60)  | 57.8(fixed)                             | — | -1.1  | 57.8  |
| <i>u</i> <sub>1745</sub> | C(23)...H(53)    | 649.3(142) | 83.3(fixed)                             | — | -2.7  | 83.3  |
| <i>u</i> <sub>2058</sub> | H(14)...H(30)    | 649.9(74)  | 50.6(fixed)                             | — | -14.3 | 50.6  |
| <i>u</i> <sub>1951</sub> | C(11)...H(20)    | 650.0(45)  | 39.7(fixed)                             | — | -10.5 | 39.7  |
| <i>u</i> <sub>1980</sub> | C(81)...H(120)   | 650.1(44)  | 31.6(fixed)                             | — | -2.5  | 31.6  |
| <i>u</i> <sub>1923</sub> | H(79)...C(109)   | 650.2(106) | 57.7(fixed)                             | — | 7.8   | 57.7  |
| <i>u</i> <sub>1911</sub> | H(149)...H(178)  | 650.6(85)  | 49.0(fixed)                             | — | 4.6   | 49.0  |
| <i>u</i> <sub>1722</sub> | H(86)...H(116)   | 650.6(76)  | 56.0(fixed)                             | — | 10.2  | 56.0  |
| <i>u</i> <sub>1858</sub> | H(30)...H(58)    | 651.2(52)  | 52.6(fixed)                             | — | 3.2   | 52.6  |
| <i>u</i> <sub>2078</sub> | H(24)...H(58)    | 651.2(64)  | 56.2(fixed)                             | — | 0.5   | 56.2  |
| <i>u</i> <sub>1807</sub> | H(137)...H(165)  | 651.6(121) | 65.4(fixed)                             | — | -3.3  | 65.4  |
| <i>u</i> <sub>2093</sub> | H(14)...H(28)    | 651.7(86)  | 60.1(fixed)                             | — | -17.2 | 60.1  |
| <i>u</i> <sub>1954</sub> | Si(3)...C(39)    | 651.9(44)  | 33.4(tied to <i>u</i> <sub>1727</sub> ) | — | -2.5  | 27.7  |
| <i>u</i> <sub>1940</sub> | C(147)...C(175)  | 652.1(67)  | 44.4(tied to <i>u</i> <sub>1727</sub> ) | — | -0.4  | 36.9  |
| <i>u</i> <sub>1995</sub> | H(141)...H(148)  | 652.2(60)  | 47.5(fixed)                             | — | -7.0  | 47.5  |
| <i>u</i> <sub>1992</sub> | C(135)...H(146)  | 652.3(62)  | 37.0(fixed)                             | — | -4.3  | 37.0  |
| <i>u</i> <sub>1981</sub> | H(14)...H(22)    | 652.5(86)  | 69.1(fixed)                             | — | -8.0  | 69.1  |
| <i>u</i> <sub>1887</sub> | H(16)...H(41)    | 652.9(105) | 90.2(fixed)                             | — | 9.8   | 90.2  |
| <i>u</i> <sub>2122</sub> | C(69)...H(111)   | 653.2(74)  | 62.5(fixed)                             | — | -7.6  | 62.5  |
| <i>u</i> <sub>1949</sub> | H(29)...H(57)    | 653.5(43)  | 51.7(fixed)                             | — | 1.4   | 51.7  |
| <i>u</i> <sub>1917</sub> | H(70)...H(84)    | 654.3(86)  | 58.5(fixed)                             | — | 1.1   | 58.5  |
| <i>u</i> <sub>1734</sub> | H(25)...H(53)    | 654.3(197) | 108.9(fixed)                            | — | -1.8  | 108.9 |

|                          |                  |            |                                         |   |       |      |
|--------------------------|------------------|------------|-----------------------------------------|---|-------|------|
| <i>u</i> <sub>1875</sub> | H(82)...H(121)   | 654.4(48)  | 45.9(fixed)                             | — | 4.1   | 45.9 |
| <i>u</i> <sub>2023</sub> | H(21)...H(57)    | 654.5(51)  | 50.4(fixed)                             | — | -2.9  | 50.4 |
| <i>u</i> <sub>2010</sub> | H(136)...H(181)  | 654.5(65)  | 58.1(fixed)                             | — | -6.5  | 58.1 |
| <i>u</i> <sub>1950</sub> | H(20)...H(57)    | 654.5(40)  | 44.6(fixed)                             | — | -0.5  | 44.6 |
| <i>u</i> <sub>2048</sub> | Si(66)...H(98)   | 654.6(64)  | 47.1(fixed)                             | — | -2.3  | 47.1 |
| <i>u</i> <sub>2045</sub> | H(8)...H(58)     | 654.6(56)  | 43.1(fixed)                             | — | -9.4  | 43.1 |
| <i>u</i> <sub>1762</sub> | H(87)...H(116)   | 655.0(125) | 58.1(fixed)                             | — | 8.6   | 58.1 |
| <i>u</i> <sub>1952</sub> | H(72)...C(81)    | 655.0(69)  | 51.3(fixed)                             | — | -5.0  | 51.3 |
| <i>u</i> <sub>1990</sub> | H(132)...C(167)  | 655.0(82)  | 55.9(fixed)                             | — | 1.6   | 55.9 |
| <i>u</i> <sub>1934</sub> | Si(3)...H(41)    | 655.2(59)  | 58.1(fixed)                             | — | -1.4  | 58.1 |
| <i>u</i> <sub>1989</sub> | H(8)...H(33)     | 655.6(88)  | 84.6(fixed)                             | — | 12.2  | 84.6 |
| <i>u</i> <sub>1871</sub> | H(18)...C(51)    | 655.7(101) | 61.0(fixed)                             | — | -6.4  | 61.0 |
| <i>u</i> <sub>1953</sub> | Si(127)...C(167) | 656.2(40)  | 34.9(tied to <i>u</i> <sub>1727</sub> ) | — | -2.4  | 29.0 |
| <i>u</i> <sub>1847</sub> | C(15)...H(52)    | 656.5(96)  | 58.8(fixed)                             | — | -6.1  | 58.8 |
| <i>u</i> <sub>1979</sub> | C(27)...H(57)    | 656.6(26)  | 32.6(fixed)                             | — | -1.6  | 32.6 |
| <i>u</i> <sub>1898</sub> | C(135)...H(164)  | 656.7(123) | 58.6(fixed)                             | — | -1.9  | 58.6 |
| <i>u</i> <sub>1867</sub> | H(137)...C(163)  | 656.8(103) | 57.8(fixed)                             | — | -3.4  | 57.8 |
| <i>u</i> <sub>1971</sub> | H(14)...H(20)    | 656.8(73)  | 67.0(fixed)                             | — | -9.3  | 67.0 |
| <i>u</i> <sub>2092</sub> | H(12)...H(45)    | 656.8(120) | 79.2(fixed)                             | — | -0.8  | 79.2 |
| <i>u</i> <sub>1794</sub> | H(82)...H(112)   | 656.9(117) | 56.3(fixed)                             | — | 9.2   | 56.3 |
| <i>u</i> <sub>2177</sub> | H(71)...C(109)   | 656.9(90)  | 63.3(fixed)                             | — | -5.4  | 63.3 |
| <i>u</i> <sub>1974</sub> | H(79)...H(92)    | 657.0(67)  | 59.4(fixed)                             | — | -4.3  | 59.4 |
| <i>u</i> <sub>2039</sub> | H(16)...H(48)    | 657.0(122) | 86.9(fixed)                             | — | -4.4  | 86.9 |
| <i>u</i> <sub>1964</sub> | H(134)...H(145)  | 657.1(65)  | 49.2(fixed)                             | — | -7.0  | 49.2 |
| <i>u</i> <sub>1961</sub> | Si(4)...C(35)    | 657.3(21)  | 28.4(tied to <i>u</i> <sub>1727</sub> ) | — | -3.2  | 23.6 |
| <i>u</i> <sub>2006</sub> | H(142)...C(151)  | 657.3(77)  | 35.5(fixed)                             | — | -4.7  | 35.5 |
| <i>u</i> <sub>1886</sub> | C(151)...H(177)  | 657.4(168) | 39.3(fixed)                             | — | -6.5  | 39.3 |
| <i>u</i> <sub>2015</sub> | C(135)...H(144)  | 657.5(45)  | 32.6(fixed)                             | — | -5.5  | 32.6 |
| <i>u</i> <sub>1987</sub> | H(148)...C(175)  | 657.7(49)  | 48.0(fixed)                             | — | 2.5   | 48.0 |
| <i>u</i> <sub>2029</sub> | C(69)...H(114)   | 657.7(136) | 47.7(fixed)                             | — | -0.9  | 47.7 |
| <i>u</i> <sub>1931</sub> | H(20)...H(59)    | 658.0(46)  | 48.8(fixed)                             | — | 4.4   | 48.8 |
| <i>u</i> <sub>2005</sub> | Si(128)...C(155) | 658.2(39)  | 42.2(tied to <i>u</i> <sub>1727</sub> ) | — | -2.6  | 35.1 |
| <i>u</i> <sub>1998</sub> | H(22)...C(51)    | 658.6(95)  | 51.6(fixed)                             | — | -0.8  | 51.6 |
| <i>u</i> <sub>2051</sub> | Si(66)...C(97)   | 658.8(47)  | 35.7(tied to <i>u</i> <sub>1727</sub> ) | — | -4.5  | 29.7 |
| <i>u</i> <sub>2031</sub> | Si(65)...C(93)   | 658.9(42)  | 37.9(tied to <i>u</i> <sub>1727</sub> ) | — | -2.7  | 31.4 |
| <i>u</i> <sub>2074</sub> | H(74)...C(105)   | 659.1(84)  | 52.1(fixed)                             | — | -1.8  | 52.1 |
| <i>u</i> <sub>2127</sub> | H(138)...H(152)  | 659.8(84)  | 48.3(fixed)                             | — | -12.0 | 48.3 |
| <i>u</i> <sub>2070</sub> | H(21)...C(51)    | 659.8(97)  | 48.4(fixed)                             | — | -8.9  | 48.4 |
| <i>u</i> <sub>1955</sub> | H(134)...H(146)  | 659.9(88)  | 56.3(fixed)                             | — | -4.5  | 56.3 |
| <i>u</i> <sub>2133</sub> | H(75)...H(108)   | 660.2(94)  | 77.1(fixed)                             | — | -1.8  | 77.1 |
| <i>u</i> <sub>2114</sub> | H(76)...H(107)   | 660.4(87)  | 62.3(fixed)                             | — | -7.8  | 62.3 |
| <i>u</i> <sub>2065</sub> | H(183)...H(186)  | 660.6(35)  | 24.9(fixed)                             | — | -18.3 | 24.9 |
| <i>u</i> <sub>2052</sub> | H(80)...C(89)    | 661.1(64)  | 38.5(fixed)                             | — | -6.1  | 38.5 |
| <i>u</i> <sub>2080</sub> | Si(4)...H(45)    | 661.4(79)  | 45.0(fixed)                             | — | -8.2  | 45.0 |
| <i>u</i> <sub>2088</sub> | H(145)...H(182)  | 661.5(59)  | 51.8(fixed)                             | — | -10.9 | 51.8 |
| <i>u</i> <sub>2099</sub> | H(136)...H(154)  | 661.9(102) | 46.0(fixed)                             | — | -10.6 | 46.0 |

|                          |                  |            |                                         |   |       |      |
|--------------------------|------------------|------------|-----------------------------------------|---|-------|------|
| <i>u</i> <sub>2059</sub> | H(148)...C(179)  | 661.9(37)  | 35.5(fixed)                             | — | -6.1  | 35.5 |
| <i>u</i> <sub>2017</sub> | H(14)...H(42)    | 661.9(72)  | 69.2(fixed)                             | — | 10.4  | 69.2 |
| <i>u</i> <sub>2026</sub> | H(140)...C(151)  | 662.1(52)  | 32.4(fixed)                             | — | -6.0  | 32.4 |
| <i>u</i> <sub>2108</sub> | H(14)...H(45)    | 662.4(103) | 78.8(fixed)                             | — | -1.7  | 78.8 |
| <i>u</i> <sub>2034</sub> | H(16)...H(42)    | 662.4(92)  | 74.6(fixed)                             | — | 3.8   | 74.6 |
| <i>u</i> <sub>2075</sub> | H(14)...H(59)    | 662.6(77)  | 47.3(fixed)                             | — | -5.1  | 47.3 |
| <i>u</i> <sub>1933</sub> | H(79)...H(102)   | 662.7(159) | 66.8(fixed)                             | — | 3.7   | 66.8 |
| <i>u</i> <sub>1988</sub> | H(70)...H(83)    | 662.9(66)  | 46.8(fixed)                             | — | -3.8  | 46.8 |
| <i>u</i> <sub>2027</sub> | C(19)...H(57)    | 662.9(39)  | 33.5(fixed)                             | — | -3.8  | 33.5 |
| <i>u</i> <sub>2062</sub> | Si(3)...H(48)    | 663.7(58)  | 40.2(fixed)                             | — | -6.5  | 40.2 |
| <i>u</i> <sub>1927</sub> | H(92)...H(120)   | 663.9(49)  | 46.3(fixed)                             | — | -0.2  | 46.3 |
| <i>u</i> <sub>2100</sub> | H(138)...H(146)  | 663.9(85)  | 56.0(fixed)                             | — | -7.2  | 56.0 |
| <i>u</i> <sub>2036</sub> | C(7)...H(22)     | 664.2(61)  | 40.0(fixed)                             | — | -8.8  | 40.0 |
| <i>u</i> <sub>2069</sub> | C(143)...H(172)  | 664.2(116) | 37.0(fixed)                             | — | -2.9  | 37.0 |
| <i>u</i> <sub>2079</sub> | H(134)...C(159)  | 664.2(81)  | 69.7(fixed)                             | — | 3.6   | 69.7 |
| <i>u</i> <sub>2103</sub> | H(9)...H(58)     | 664.3(66)  | 48.4(fixed)                             | — | -10.8 | 48.4 |
| <i>u</i> <sub>2013</sub> | H(79)...H(108)   | 664.9(152) | 71.0(fixed)                             | — | -4.6  | 71.0 |
| <i>u</i> <sub>2004</sub> | C(81)...H(119)   | 665.3(41)  | 30.9(fixed)                             | — | -3.2  | 30.9 |
| <i>u</i> <sub>1948</sub> | Si(66)...C(109)  | 665.3(36)  | 27.2(tied to <i>u</i> <sub>1727</sub> ) | — | -3.7  | 22.6 |
| <i>u</i> <sub>2014</sub> | H(12)...C(43)    | 666.1(69)  | 52.2(fixed)                             | — | 3.8   | 52.2 |
| <i>u</i> <sub>2235</sub> | H(12)...H(28)    | 666.1(97)  | 69.7(fixed)                             | — | -17.0 | 69.7 |
| <i>u</i> <sub>2085</sub> | H(138)...H(144)  | 666.2(71)  | 50.7(fixed)                             | — | -6.1  | 50.7 |
| <i>u</i> <sub>2146</sub> | C(77)...H(88)    | 666.2(47)  | 34.7(fixed)                             | — | -12.0 | 34.7 |
| <i>u</i> <sub>2101</sub> | H(145)...H(174)  | 666.3(122) | 62.9(fixed)                             | — | -3.2  | 62.9 |
| <i>u</i> <sub>2077</sub> | H(10)...H(21)    | 666.4(57)  | 49.2(fixed)                             | — | -12.6 | 49.2 |
| <i>u</i> <sub>1889</sub> | H(16)...C(51)    | 666.5(91)  | 49.4(fixed)                             | — | -9.2  | 49.4 |
| <i>u</i> <sub>1999</sub> | C(27)...H(58)    | 666.8(38)  | 33.4(fixed)                             | — | -3.4  | 33.4 |
| <i>u</i> <sub>1910</sub> | H(82)...H(110)   | 667.3(90)  | 52.7(fixed)                             | — | 2.7   | 52.7 |
| <i>u</i> <sub>2000</sub> | C(131)...C(167)  | 667.4(62)  | 56.3(tied to <i>u</i> <sub>1727</sub> ) | — | -0.2  | 46.8 |
| <i>u</i> <sub>2028</sub> | H(72)...H(86)    | 667.4(64)  | 54.8(fixed)                             | — | -13.8 | 54.8 |
| <i>u</i> <sub>2119</sub> | H(148)...H(182)  | 667.5(63)  | 64.2(fixed)                             | — | -6.4  | 64.2 |
| <i>u</i> <sub>1914</sub> | C(15)...H(53)    | 667.6(93)  | 49.1(fixed)                             | — | -9.1  | 49.1 |
| <i>u</i> <sub>1997</sub> | Si(128)...C(163) | 668.2(36)  | 34.4(tied to <i>u</i> <sub>1727</sub> ) | — | -2.3  | 28.6 |
| <i>u</i> <sub>2148</sub> | H(86)...H(120)   | 668.5(60)  | 46.1(fixed)                             | — | 0.5   | 46.1 |
| <i>u</i> <sub>2047</sub> | Si(128)...H(172) | 668.8(54)  | 31.1(fixed)                             | — | -1.4  | 31.1 |
| <i>u</i> <sub>2037</sub> | C(77)...H(110)   | 668.8(106) | 57.9(fixed)                             | — | 5.6   | 57.9 |
| <i>u</i> <sub>1896</sub> | C(85)...C(113)   | 669.4(71)  | 52.0(tied to <i>u</i> <sub>1727</sub> ) | — | -1.2  | 43.2 |
| <i>u</i> <sub>2035</sub> | H(78)...C(105)   | 669.5(102) | 50.3(fixed)                             | — | -8.2  | 50.3 |
| <i>u</i> <sub>2242</sub> | H(12)...H(30)    | 669.6(99)  | 58.6(fixed)                             | — | -16.8 | 58.6 |
| <i>u</i> <sub>2136</sub> | C(23)...H(58)    | 669.6(50)  | 36.9(fixed)                             | — | -4.1  | 36.9 |
| <i>u</i> <sub>2068</sub> | Si(128)...H(158) | 669.6(60)  | 45.5(fixed)                             | — | -2.3  | 45.5 |
| <i>u</i> <sub>1993</sub> | H(152)...H(176)  | 669.7(208) | 63.0(fixed)                             | — | -4.6  | 63.0 |
| <i>u</i> <sub>2143</sub> | C(69)...H(115)   | 670.2(111) | 41.9(fixed)                             | — | -7.6  | 41.9 |
| <i>u</i> <sub>2032</sub> | H(91)...H(120)   | 670.4(58)  | 51.1(fixed)                             | — | -2.8  | 51.1 |
| <i>u</i> <sub>2102</sub> | H(78)...H(92)    | 670.5(65)  | 49.0(fixed)                             | — | -10.6 | 49.0 |
| <i>u</i> <sub>2145</sub> | H(24)...C(55)    | 670.5(38)  | 41.4(fixed)                             | — | -3.8  | 41.4 |

|                          |                  |            |                                         |   |       |      |
|--------------------------|------------------|------------|-----------------------------------------|---|-------|------|
| <i>u</i> <sub>2049</sub> | C(143)...H(173)  | 671.6(57)  | 35.9(fixed)                             | — | -1.1  | 35.9 |
| <i>u</i> <sub>2056</sub> | C(7)...H(33)     | 671.8(79)  | 69.2(fixed)                             | — | 5.4   | 69.2 |
| <i>u</i> <sub>2060</sub> | Si(127)...C(175) | 671.8(35)  | 33.8(tied to <i>u</i> <sub>1727</sub> ) | — | -3.5  | 28.0 |
| <i>u</i> <sub>2129</sub> | C(11)...H(59)    | 672.0(61)  | 33.3(fixed)                             | — | -8.9  | 33.3 |
| <i>u</i> <sub>2025</sub> | C(89)...H(120)   | 672.2(38)  | 33.0(fixed)                             | — | -4.0  | 33.0 |
| <i>u</i> <sub>2022</sub> | Si(66)...H(103)  | 672.3(66)  | 45.5(fixed)                             | — | -6.7  | 45.5 |
| <i>u</i> <sub>2104</sub> | H(72)...H(104)   | 672.5(109) | 63.6(fixed)                             | — | 1.8   | 63.6 |
| <i>u</i> <sub>2111</sub> | H(142)...H(154)  | 672.9(101) | 53.2(fixed)                             | — | -6.3  | 53.2 |
| <i>u</i> <sub>2106</sub> | H(132)...C(163)  | 672.9(109) | 35.0(fixed)                             | — | -5.5  | 35.0 |
| <i>u</i> <sub>2054</sub> | H(90)...H(123)   | 673.2(22)  | 20.0(fixed)                             | — | -11.3 | 20.0 |
| <i>u</i> <sub>2121</sub> | C(23)...C(55)    | 674.0(28)  | 24.2(tied to <i>u</i> <sub>1727</sub> ) | — | -5.7  | 20.1 |
| <i>u</i> <sub>2057</sub> | H(71)...H(122)   | 674.1(16)  | 19.3(fixed)                             | — | -11.1 | 19.3 |
| <i>u</i> <sub>2053</sub> | H(9)...H(60)     | 674.2(17)  | 20.8(fixed)                             | — | -12.8 | 20.8 |
| <i>u</i> <sub>2095</sub> | H(140)...H(154)  | 674.3(71)  | 50.5(fixed)                             | — | -5.7  | 50.5 |
| <i>u</i> <sub>2086</sub> | H(16)...C(27)    | 674.5(43)  | 38.6(fixed)                             | — | -8.6  | 38.6 |
| <i>u</i> <sub>2055</sub> | H(133)...H(184)  | 674.5(19)  | 22.7(fixed)                             | — | -14.6 | 22.7 |
| <i>u</i> <sub>2110</sub> | H(136)...H(152)  | 674.7(98)  | 51.7(fixed)                             | — | -9.9  | 51.7 |
| <i>u</i> <sub>2030</sub> | H(72)...H(103)   | 674.7(118) | 69.8(fixed)                             | — | 7.0   | 69.8 |
| <i>u</i> <sub>2064</sub> | H(28)...H(61)    | 674.7(14)  | 21.5(fixed)                             | — | -15.0 | 21.5 |
| <i>u</i> <sub>2067</sub> | H(152)...H(185)  | 674.7(14)  | 20.9(fixed)                             | — | -14.8 | 20.9 |
| <i>u</i> <sub>1924</sub> | H(30)...H(59)    | 674.8(54)  | 56.9(fixed)                             | — | 6.4   | 56.9 |
| <i>u</i> <sub>2158</sub> | H(17)...H(42)    | 675.0(84)  | 60.2(fixed)                             | — | 1.0   | 60.2 |
| <i>u</i> <sub>2245</sub> | H(134)...H(164)  | 675.0(148) | 54.8(fixed)                             | — | -6.5  | 54.8 |
| <i>u</i> <sub>2165</sub> | Si(65)...H(96)   | 675.1(55)  | 45.8(fixed)                             | — | -4.7  | 45.8 |
| <i>u</i> <sub>1976</sub> | C(81)...C(109)   | 675.3(75)  | 49.5(tied to <i>u</i> <sub>1727</sub> ) | — | -1.8  | 41.1 |
| <i>u</i> <sub>2171</sub> | H(76)...C(105)   | 675.9(64)  | 47.1(fixed)                             | — | -6.9  | 47.1 |
| <i>u</i> <sub>2167</sub> | Si(127)...H(158) | 677.2(72)  | 35.3(fixed)                             | — | -7.3  | 35.3 |
| <i>u</i> <sub>2187</sub> | H(24)...H(57)    | 677.2(52)  | 52.0(fixed)                             | — | -2.0  | 52.0 |
| <i>u</i> <sub>2166</sub> | H(21)...H(59)    | 677.4(62)  | 55.1(fixed)                             | — | -4.6  | 55.1 |
| <i>u</i> <sub>2003</sub> | Si(4)...H(49)    | 677.6(71)  | 60.1(fixed)                             | — | -1.5  | 60.1 |
| <i>u</i> <sub>2083</sub> | H(16)...C(47)    | 677.7(95)  | 67.0(fixed)                             | — | -9.8  | 67.0 |
| <i>u</i> <sub>2033</sub> | Si(4)...C(47)    | 677.7(41)  | 44.0(tied to <i>u</i> <sub>1727</sub> ) | — | -5.8  | 36.5 |
| <i>u</i> <sub>2112</sub> | H(145)...H(173)  | 677.7(70)  | 62.9(fixed)                             | — | -1.8  | 62.9 |
| <i>u</i> <sub>2084</sub> | C(131)...H(161)  | 678.0(72)  | 68.8(fixed)                             | — | 2.9   | 68.8 |
| <i>u</i> <sub>2043</sub> | H(71)...H(86)    | 678.3(92)  | 61.9(fixed)                             | — | -12.9 | 61.9 |
| <i>u</i> <sub>2081</sub> | Si(3)...C(31)    | 678.4(36)  | 37.1(tied to <i>u</i> <sub>1727</sub> ) | — | -3.3  | 30.8 |
| <i>u</i> <sub>2042</sub> | H(12)...H(21)    | 678.6(84)  | 62.8(fixed)                             | — | -11.9 | 62.8 |
| <i>u</i> <sub>2072</sub> | H(14)...C(43)    | 679.0(60)  | 48.6(fixed)                             | — | -0.3  | 48.6 |
| <i>u</i> <sub>1938</sub> | H(92)...H(121)   | 679.2(61)  | 50.3(fixed)                             | — | 3.5   | 50.3 |
| <i>u</i> <sub>2184</sub> | C(85)...H(120)   | 679.3(47)  | 34.0(fixed)                             | — | -3.0  | 34.0 |
| <i>u</i> <sub>2181</sub> | C(135)...H(183)  | 679.3(45)  | 45.8(fixed)                             | — | -16.1 | 45.8 |
| <i>u</i> <sub>2061</sub> | H(75)...H(116)   | 679.7(162) | 69.6(fixed)                             | — | 11.9  | 69.6 |
| <i>u</i> <sub>2141</sub> | C(85)...C(117)   | 680.1(26)  | 23.5(tied to <i>u</i> <sub>1727</sub> ) | — | -4.4  | 19.5 |
| <i>u</i> <sub>2096</sub> | H(12)...C(19)    | 680.2(56)  | 40.2(fixed)                             | — | -14.4 | 40.2 |
| <i>u</i> <sub>2091</sub> | H(20)...C(47)    | 680.3(56)  | 62.6(fixed)                             | — | 6.0   | 62.6 |
| <i>u</i> <sub>2139</sub> | C(73)...H(121)   | 680.3(59)  | 27.8(fixed)                             | — | -10.3 | 27.8 |

|                          |                  |            |                             |   |       |      |
|--------------------------|------------------|------------|-----------------------------|---|-------|------|
| <i>u</i> <sub>2169</sub> | H(10)...H(22)    | 680.7(79)  | 61.4(fixed)                 | — | -11.0 | 61.4 |
| <i>u</i> <sub>2138</sub> | Si(65)...H(115)  | 681.2(80)  | 41.0(fixed)                 | — | -7.4  | 41.0 |
| <i>u</i> <sub>2176</sub> | H(71)...H(116)   | 681.4(182) | 60.9(fixed)                 | — | -3.7  | 60.9 |
| <i>u</i> <sub>2123</sub> | C(139)...H(150)  | 681.7(49)  | 31.3(fixed)                 | — | -11.5 | 31.3 |
| <i>u</i> <sub>2120</sub> | H(13)...C(43)    | 682.4(72)  | 45.5(fixed)                 | — | -1.3  | 45.5 |
| <i>u</i> <sub>2186</sub> | C(23)...H(57)    | 682.4(43)  | 34.7(fixed)                 | — | -3.8  | 34.7 |
| <i>u</i> <sub>2147</sub> | C(15)...H(42)    | 682.4(76)  | 53.0(fixed)                 | — | -0.1  | 53.0 |
| <i>u</i> <sub>2113</sub> | H(83)...H(119)   | 682.8(47)  | 45.4(fixed)                 | — | -5.5  | 45.4 |
| <i>u</i> <sub>2150</sub> | Si(66)...H(102)  | 682.9(78)  | 36.0(fixed)                 | — | -5.6  | 36.0 |
| <i>u</i> <sub>2206</sub> | H(18)...C(27)    | 683.0(67)  | 49.6(fixed)                 | — | -8.3  | 49.6 |
| <i>u</i> <sub>2212</sub> | H(145)...H(183)  | 683.2(85)  | 48.8(fixed)                 | — | -13.0 | 48.8 |
| <i>u</i> <sub>2203</sub> | H(86)...C(117)   | 683.2(37)  | 33.8(fixed)                 | — | -3.2  | 33.8 |
| <i>u</i> <sub>2044</sub> | Si(128)...H(165) | 684.5(50)  | 43.4(fixed)                 | — | -2.5  | 43.4 |
| <i>u</i> <sub>2073</sub> | C(15)...H(41)    | 684.6(86)  | 69.1(fixed)                 | — | 1.4   | 69.1 |
| <i>u</i> <sub>2202</sub> | H(25)...H(57)    | 685.0(44)  | 47.4(fixed)                 | — | -0.7  | 47.4 |
| <i>u</i> <sub>2179</sub> | C(7)...H(48)     | 685.1(74)  | 44.9(fixed)                 | — | -7.2  | 44.9 |
| <i>u</i> <sub>2210</sub> | H(87)...H(120)   | 685.1(49)  | 49.1(fixed)                 | — | -1.7  | 49.1 |
| <i>u</i> <sub>2071</sub> | C(7)...H(50)     | 685.2(62)  | 52.3(fixed)                 | — | -4.2  | 52.3 |
| <i>u</i> <sub>2214</sub> | H(150)...C(179)  | 685.4(43)  | 38.3(fixed)                 | — | -8.2  | 38.3 |
| <i>u</i> <sub>2194</sub> | Si(127)...H(156) | 685.6(92)  | 40.9(fixed)                 | — | -7.7  | 40.9 |
| <i>u</i> <sub>2024</sub> | C(81)...H(111)   | 685.8(43)  | 53.7(fixed)                 | — | -0.2  | 53.7 |
| <i>u</i> <sub>2107</sub> | H(133)...C(143)  | 685.8(58)  | 29.6(fixed)                 | — | -9.3  | 29.6 |
| <i>u</i> <sub>2160</sub> | C(15)...H(26)    | 685.8(40)  | 30.2(fixed)                 | — | -7.9  | 30.2 |
| <i>u</i> <sub>2134</sub> | H(8)...C(47)     | 685.9(81)  | 67.2(fixed)                 | — | -10.0 | 67.2 |
| <i>u</i> <sub>2087</sub> | C(69)...H(83)    | 686.5(43)  | 34.2(fixed)                 | — | -7.5  | 34.2 |
| <i>u</i> <sub>2256</sub> | C(73)...H(108)   | 687.0(80)  | 55.5(fixed)                 | — | -6.8  | 55.5 |
| <i>u</i> <sub>2090</sub> | H(29)...H(58)    | 687.1(48)  | 46.9(fixed)                 | — | -5.3  | 46.9 |
| <i>u</i> <sub>2217</sub> | C(19)...H(52)    | 687.1(100) | 51.3(fixed)                 | — | -9.3  | 51.3 |
| <i>u</i> <sub>2118</sub> | C(11)...H(42)    | 687.4(57)  | 50.2(fixed)                 | — | 5.6   | 50.2 |
| <i>u</i> <sub>2175</sub> | C(77)...H(108)   | 687.5(126) | 51.1(fixed)                 | — | -8.8  | 51.1 |
| <i>u</i> <sub>2200</sub> | H(80)...H(92)    | 687.7(88)  | 59.5(fixed)                 | — | -8.7  | 59.5 |
| <i>u</i> <sub>2197</sub> | H(87)...H(119)   | 688.2(54)  | 45.4(fixed)                 | — | -0.2  | 45.4 |
| <i>u</i> <sub>2156</sub> | H(72)...C(101)   | 688.6(97)  | 55.1(fixed)                 | — | 1.8   | 55.1 |
| <i>u</i> <sub>2125</sub> | C(19)...H(59)    | 688.7(41)  | 34.3(fixed)                 | — | -3.7  | 34.3 |
| <i>u</i> <sub>2050</sub> | C(85)...H(115)   | 689.3(96)  | 71.0(fixed)                 | — | -6.5  | 71.0 |
| <i>u</i> <sub>2255</sub> | C(77)...H(90)    | 689.4(51)  | 34.0(fixed)                 | — | -12.1 | 34.0 |
| <i>u</i> <sub>2159</sub> | H(136)...C(143)  | 689.4(56)  | 35.0(fixed)                 | — | -8.8  | 35.0 |
| <i>u</i> <sub>2152</sub> | H(72)...H(99)    | 689.6(65)  | 71.7(fixed)                 | — | 9.9   | 71.7 |
| <i>u</i> <sub>2116</sub> | H(79)...H(111)   | 689.6(103) | 70.6(fixed)                 | — | 4.4   | 70.6 |
| <i>u</i> <sub>2115</sub> | H(13)...H(42)    | 689.7(68)  | 60.2(fixed)                 | — | 9.7   | 60.2 |
| <i>u</i> <sub>2011</sub> | H(84)...H(108)   | 689.7(239) | 69.8(fixed)                 | — | -5.4  | 69.8 |
| <i>u</i> <sub>2207</sub> | H(87)...C(117)   | 689.8(31)  | 35.3(fixed)                 | — | -3.3  | 35.3 |
| <i>u</i> <sub>2298</sub> | H(13)...H(45)    | 690.1(111) | 69.7(fixed)                 | — | -8.0  | 69.7 |
| <i>u</i> <sub>2157</sub> | C(77)...C(81)    | 690.4(20)  | 24.9(tied to <i>u</i> 1727) | — | -6.1  | 20.7 |
| <i>u</i> <sub>2253</sub> | C(131)...H(164)  | 690.4(134) | 38.4(fixed)                 | — | -7.6  | 38.4 |
| <i>u</i> <sub>2248</sub> | H(9)...H(59)     | 691.1(74)  | 51.9(fixed)                 | — | -11.5 | 51.9 |

|                          |                  |            |                                         |   |       |      |
|--------------------------|------------------|------------|-----------------------------------------|---|-------|------|
| <i>u</i> <sub>2229</sub> | H(25)...C(55)    | 691.1(28)  | 35.0(fixed)                             | — | -5.0  | 35.0 |
| <i>u</i> <sub>1926</sub> | H(76)...H(104)   | 691.4(108) | 67.5(fixed)                             | — | 14.4  | 67.5 |
| <i>u</i> <sub>2153</sub> | Si(127)...H(177) | 691.4(59)  | 49.6(fixed)                             | — | -3.9  | 49.6 |
| <i>u</i> <sub>2267</sub> | H(138)...H(178)  | 691.6(69)  | 69.5(fixed)                             | — | 6.0   | 69.5 |
| <i>u</i> <sub>2211</sub> | C(85)...H(119)   | 691.9(41)  | 33.3(fixed)                             | — | -3.7  | 33.3 |
| <i>u</i> <sub>2198</sub> | H(74)...C(81)    | 692.1(45)  | 27.4(fixed)                             | — | -8.8  | 27.4 |
| <i>u</i> <sub>2227</sub> | H(146)...C(171)  | 692.2(89)  | 40.5(fixed)                             | — | -5.5  | 40.5 |
| <i>u</i> <sub>2140</sub> | H(136)...H(145)  | 692.3(83)  | 46.3(fixed)                             | — | -7.0  | 46.3 |
| <i>u</i> <sub>2154</sub> | C(15)...H(50)    | 692.6(79)  | 54.4(fixed)                             | — | -7.6  | 54.4 |
| <i>u</i> <sub>2236</sub> | H(8)...H(59)     | 692.7(63)  | 45.5(fixed)                             | — | -11.9 | 45.5 |
| <i>u</i> <sub>1907</sub> | H(12)...H(54)    | 692.7(126) | 79.6(fixed)                             | — | 10.2  | 79.6 |
| <i>u</i> <sub>2021</sub> | H(141)...H(172)  | 692.7(69)  | 70.4(fixed)                             | — | 11.1  | 70.4 |
| <i>u</i> <sub>2149</sub> | C(15)...C(19)    | 692.7(21)  | 26.1(tied to <i>u</i> <sub>1727</sub> ) | — | -6.9  | 21.7 |
| <i>u</i> <sub>2162</sub> | Si(128)...H(173) | 692.9(37)  | 27.5(fixed)                             | — | -3.0  | 27.5 |
| <i>u</i> <sub>2170</sub> | H(78)...C(81)    | 693.5(38)  | 37.1(fixed)                             | — | -4.3  | 37.1 |
| <i>u</i> <sub>2117</sub> | H(78)...H(83)    | 693.7(62)  | 55.0(fixed)                             | — | 0.5   | 55.0 |
| <i>u</i> <sub>2082</sub> | H(16)...H(21)    | 694.3(59)  | 57.6(fixed)                             | — | 1.1   | 57.6 |
| <i>u</i> <sub>2193</sub> | C(139)...H(152)  | 694.4(64)  | 34.8(fixed)                             | — | -9.9  | 34.8 |
| <i>u</i> <sub>2128</sub> | Si(4)...H(36)    | 694.6(33)  | 30.9(fixed)                             | — | -3.5  | 30.9 |
| <i>u</i> <sub>2135</sub> | C(15)...H(21)    | 694.6(40)  | 40.8(fixed)                             | — | -4.9  | 40.8 |
| <i>u</i> <sub>2265</sub> | H(71)...C(113)   | 694.7(136) | 42.7(fixed)                             | — | -7.6  | 42.7 |
| <i>u</i> <sub>2282</sub> | H(25)...H(58)    | 694.7(48)  | 45.0(fixed)                             | — | -5.9  | 45.0 |
| <i>u</i> <sub>2270</sub> | H(145)...H(172)  | 694.8(133) | 54.9(fixed)                             | — | -8.3  | 54.9 |
| <i>u</i> <sub>2105</sub> | C(81)...H(121)   | 695.2(39)  | 29.8(fixed)                             | — | -3.7  | 29.8 |
| <i>u</i> <sub>2260</sub> | Si(65)...H(111)  | 696.1(45)  | 43.3(fixed)                             | — | -8.3  | 43.3 |
| <i>u</i> <sub>2310</sub> | H(146)...H(182)  | 696.3(59)  | 52.4(fixed)                             | — | -14.4 | 52.4 |
| <i>u</i> <sub>2316</sub> | H(18)...H(48)    | 696.4(113) | 71.7(fixed)                             | — | -8.9  | 71.7 |
| <i>u</i> <sub>2185</sub> | Si(128)...H(174) | 696.5(44)  | 28.9(fixed)                             | — | -3.4  | 28.9 |
| <i>u</i> <sub>2190</sub> | Si(3)...H(34)    | 696.5(53)  | 50.9(fixed)                             | — | -3.2  | 50.9 |
| <i>u</i> <sub>2098</sub> | Si(66)...H(111)  | 696.9(42)  | 31.6(fixed)                             | — | -5.1  | 31.6 |
| <i>u</i> <sub>2137</sub> | H(136)...H(164)  | 697.2(144) | 62.8(fixed)                             | — | -3.9  | 62.8 |
| <i>u</i> <sub>2002</sub> | H(141)...H(169)  | 697.4(78)  | 73.2(fixed)                             | — | 7.2   | 73.2 |
| <i>u</i> <sub>2246</sub> | H(9)...C(19)     | 697.6(51)  | 36.7(fixed)                             | — | -16.2 | 36.7 |
| <i>u</i> <sub>1959</sub> | H(26)...H(53)    | 697.6(141) | 88.6(fixed)                             | — | -2.4  | 88.6 |
| <i>u</i> <sub>2220</sub> | H(16)...H(30)    | 697.9(58)  | 53.4(fixed)                             | — | -8.9  | 53.4 |
| <i>u</i> <sub>2321</sub> | H(150)...H(182)  | 698.1(64)  | 64.8(fixed)                             | — | -11.5 | 64.8 |
| <i>u</i> <sub>2192</sub> | H(83)...H(121)   | 698.5(59)  | 49.7(fixed)                             | — | -4.4  | 49.7 |
| <i>u</i> <sub>2038</sub> | C(11)...C(51)    | 698.5(82)  | 66.4(tied to <i>u</i> <sub>1727</sub> ) | — | -1.9  | 55.2 |
| <i>u</i> <sub>2164</sub> | Si(4)...H(37)    | 699.1(25)  | 27.8(fixed)                             | — | -5.4  | 27.8 |
| <i>u</i> <sub>2131</sub> | Si(127)...H(160) | 699.4(59)  | 43.9(fixed)                             | — | -7.5  | 43.9 |
| <i>u</i> <sub>2174</sub> | C(69)...H(84)    | 700.2(63)  | 42.4(fixed)                             | — | -7.4  | 42.4 |
| <i>u</i> <sub>2204</sub> | Si(3)...H(49)    | 700.4(21)  | 31.1(fixed)                             | — | -8.7  | 31.1 |
| <i>u</i> <sub>2213</sub> | C(69)...H(104)   | 700.8(91)  | 51.3(fixed)                             | — | 0.2   | 51.3 |
| <i>u</i> <sub>1942</sub> | H(78)...H(102)   | 701.5(156) | 66.1(fixed)                             | — | 4.8   | 66.1 |
| <i>u</i> <sub>2009</sub> | H(14)...H(54)    | 701.7(102) | 70.1(fixed)                             | — | 5.0   | 70.1 |
| <i>u</i> <sub>2196</sub> | C(139)...C(143)  | 702.4(20)  | 20.6(tied to <i>u</i> <sub>1727</sub> ) | — | -4.7  | 17.2 |

|                          |                  |            |                                         |   |       |      |
|--------------------------|------------------|------------|-----------------------------------------|---|-------|------|
| <i>u</i> <sub>2205</sub> | H(141)...H(152)  | 702.5(75)  | 47.0(fixed)                             | — | -8.5  | 47.0 |
| <i>u</i> <sub>2224</sub> | C(15)...C(39)    | 702.8(71)  | 51.3(tied to <i>u</i> <sub>1727</sub> ) | — | -3.4  | 42.6 |
| <i>u</i> <sub>2233</sub> | Si(4)...H(46)    | 703.0(67)  | 39.0(fixed)                             | — | -6.8  | 39.0 |
| <i>u</i> <sub>2094</sub> | H(18)...H(52)    | 703.1(106) | 77.4(fixed)                             | — | -9.1  | 77.4 |
| <i>u</i> <sub>2216</sub> | C(77)...H(83)    | 703.3(39)  | 41.0(fixed)                             | — | -4.4  | 41.0 |
| <i>u</i> <sub>2191</sub> | C(7)...H(49)     | 703.4(57)  | 54.9(fixed)                             | — | -6.1  | 54.9 |
| <i>u</i> <sub>2155</sub> | H(71)...H(88)    | 703.7(91)  | 57.1(fixed)                             | — | -11.6 | 57.1 |
| <i>u</i> <sub>2288</sub> | H(18)...C(47)    | 703.7(80)  | 54.8(fixed)                             | — | -11.3 | 54.8 |
| <i>u</i> <sub>2168</sub> | H(72)...H(88)    | 703.9(75)  | 58.6(fixed)                             | — | -13.7 | 58.6 |
| <i>u</i> <sub>2161</sub> | H(148)...H(177)  | 704.0(68)  | 63.8(fixed)                             | — | 0.2   | 63.8 |
| <i>u</i> <sub>2311</sub> | H(86)...H(119)   | 704.3(47)  | 43.4(fixed)                             | — | -5.0  | 43.4 |
| <i>u</i> <sub>2250</sub> | H(8)...H(34)     | 704.5(127) | 90.5(fixed)                             | — | 2.5   | 90.5 |
| <i>u</i> <sub>2223</sub> | H(22)...H(58)    | 704.8(46)  | 38.4(fixed)                             | — | -3.3  | 38.4 |
| <i>u</i> <sub>2163</sub> | Si(66)...H(110)  | 704.9(47)  | 28.1(fixed)                             | — | -5.9  | 28.1 |
| <i>u</i> <sub>2209</sub> | Si(127)...H(162) | 705.0(80)  | 38.5(fixed)                             | — | -6.6  | 38.5 |
| <i>u</i> <sub>2151</sub> | H(141)...H(173)  | 705.3(68)  | 63.6(fixed)                             | — | 6.6   | 63.6 |
| <i>u</i> <sub>2180</sub> | H(150)...C(175)  | 705.6(82)  | 42.0(fixed)                             | — | -1.7  | 42.0 |
| <i>u</i> <sub>2398</sub> | H(71)...H(112)   | 706.1(96)  | 64.1(fixed)                             | — | -6.1  | 64.1 |
| <i>u</i> <sub>2251</sub> | C(77)...C(109)   | 706.2(84)  | 53.2(tied to <i>u</i> <sub>1727</sub> ) | — | -2.6  | 44.2 |
| <i>u</i> <sub>2218</sub> | H(134)...H(172)  | 706.2(89)  | 78.3(fixed)                             | — | 12.7  | 78.3 |
| <i>u</i> <sub>2226</sub> | H(72)...H(83)    | 706.6(58)  | 50.0(fixed)                             | — | -8.7  | 50.0 |
| <i>u</i> <sub>2189</sub> | H(16)...C(19)    | 706.9(35)  | 41.9(fixed)                             | — | -4.4  | 41.9 |
| <i>u</i> <sub>2332</sub> | C(147)...H(183)  | 706.9(45)  | 33.7(fixed)                             | — | -13.2 | 33.7 |
| <i>u</i> <sub>2373</sub> | H(20)...H(44)    | 707.1(149) | 64.2(fixed)                             | — | -4.8  | 64.2 |
| <i>u</i> <sub>2040</sub> | H(26)...C(51)    | 707.3(97)  | 70.7(fixed)                             | — | -1.8  | 70.7 |
| <i>u</i> <sub>2225</sub> | Si(3)...H(50)    | 707.3(32)  | 32.4(fixed)                             | — | -9.2  | 32.4 |
| <i>u</i> <sub>2360</sub> | H(18)...H(30)    | 707.4(87)  | 60.7(fixed)                             | — | -11.7 | 60.7 |
| <i>u</i> <sub>2201</sub> | H(83)...H(111)   | 708.3(56)  | 67.9(fixed)                             | — | -3.1  | 67.9 |
| <i>u</i> <sub>2254</sub> | Si(65)...H(114)  | 708.6(88)  | 37.3(fixed)                             | — | -6.9  | 37.3 |
| <i>u</i> <sub>2215</sub> | H(83)...H(107)   | 709.0(191) | 49.3(fixed)                             | — | -12.0 | 49.3 |
| <i>u</i> <sub>2261</sub> | C(15)...H(49)    | 709.1(65)  | 40.0(fixed)                             | — | -10.0 | 40.0 |
| <i>u</i> <sub>2130</sub> | H(141)...C(171)  | 709.2(61)  | 52.8(fixed)                             | — | 4.5   | 52.8 |
| <i>u</i> <sub>2195</sub> | C(147)...H(177)  | 709.5(88)  | 52.6(fixed)                             | — | -4.9  | 52.6 |
| <i>u</i> <sub>2178</sub> | H(14)...H(41)    | 709.9(95)  | 84.1(fixed)                             | — | 7.2   | 84.1 |
| <i>u</i> <sub>2259</sub> | C(7)...H(34)     | 710.0(89)  | 71.2(fixed)                             | — | 1.2   | 71.2 |
| <i>u</i> <sub>2336</sub> | H(149)...H(183)  | 710.1(77)  | 43.4(fixed)                             | — | -9.6  | 43.4 |
| <i>u</i> <sub>2286</sub> | H(9)...C(47)     | 710.1(66)  | 59.4(fixed)                             | — | -11.5 | 59.4 |
| <i>u</i> <sub>2144</sub> | C(27)...H(59)    | 710.5(37)  | 35.0(fixed)                             | — | -3.4  | 35.0 |
| <i>u</i> <sub>2173</sub> | C(89)...H(121)   | 710.8(44)  | 34.6(fixed)                             | — | -4.8  | 34.6 |
| <i>u</i> <sub>2208</sub> | H(83)...C(109)   | 711.0(93)  | 55.5(fixed)                             | — | -6.7  | 55.5 |
| <i>u</i> <sub>2273</sub> | H(72)...C(97)    | 711.6(52)  | 57.7(fixed)                             | — | 4.7   | 57.7 |
| <i>u</i> <sub>2295</sub> | H(141)...H(178)  | 711.6(50)  | 52.5(fixed)                             | — | 0.0   | 52.5 |
| <i>u</i> <sub>2269</sub> | H(79)...C(81)    | 711.7(26)  | 33.3(fixed)                             | — | -6.4  | 33.3 |
| <i>u</i> <sub>2309</sub> | H(16)...H(26)    | 712.1(40)  | 35.6(fixed)                             | — | -8.9  | 35.6 |
| <i>u</i> <sub>2339</sub> | C(15)...H(28)    | 712.5(53)  | 43.5(fixed)                             | — | -13.1 | 43.5 |
| <i>u</i> <sub>2313</sub> | Si(66)...H(99)   | 712.6(43)  | 32.6(fixed)                             | — | -7.8  | 32.6 |



|                          |                 |            |                                         |   |       |       |
|--------------------------|-----------------|------------|-----------------------------------------|---|-------|-------|
| <i>u</i> <sub>2239</sub> | C(73)...H(116)  | 712.7(140) | 57.7(fixed)                             | — | 4.9   | 57.7  |
| <i>u</i> <sub>2285</sub> | C(147)...H(176) | 712.9(73)  | 49.9(fixed)                             | — | -5.7  | 49.9  |
| <i>u</i> <sub>2377</sub> | H(146)...H(183) | 712.9(70)  | 51.2(fixed)                             | — | -14.8 | 51.2  |
| <i>u</i> <sub>2188</sub> | H(83)...H(108)  | 713.1(219) | 54.8(fixed)                             | — | -11.6 | 54.8  |
| <i>u</i> <sub>2076</sub> | C(73)...H(104)  | 713.2(93)  | 53.2(fixed)                             | — | 7.2   | 53.2  |
| <i>u</i> <sub>2275</sub> | H(134)...H(160) | 713.2(67)  | 83.1(fixed)                             | — | 1.7   | 83.1  |
| <i>u</i> <sub>2097</sub> | H(86)...C(113)  | 713.3(59)  | 48.3(fixed)                             | — | -3.4  | 48.3  |
| <i>u</i> <sub>2308</sub> | C(135)...H(178) | 713.4(63)  | 56.7(fixed)                             | — | 3.4   | 56.7  |
| <i>u</i> <sub>2274</sub> | H(17)...C(19)   | 713.4(26)  | 30.1(fixed)                             | — | -5.5  | 30.1  |
| <i>u</i> <sub>2277</sub> | C(7)...C(31)    | 713.6(66)  | 61.5(tied to <i>u</i> <sub>1727</sub> ) | — | -1.9  | 51.1  |
| <i>u</i> <sub>2247</sub> | C(139)...H(145) | 714.0(34)  | 33.4(fixed)                             | — | -4.0  | 33.4  |
| <i>u</i> <sub>2238</sub> | H(91)...H(121)  | 714.0(67)  | 56.6(fixed)                             | — | -6.1  | 56.6  |
| <i>u</i> <sub>2257</sub> | H(137)...H(178) | 714.3(86)  | 68.8(fixed)                             | — | 7.6   | 68.8  |
| <i>u</i> <sub>2089</sub> | H(13)...C(51)   | 714.5(92)  | 64.2(fixed)                             | — | 1.4   | 64.2  |
| <i>u</i> <sub>2252</sub> | C(19)...H(49)   | 714.5(34)  | 64.2(fixed)                             | — | 2.8   | 64.2  |
| <i>u</i> <sub>2348</sub> | H(140)...H(178) | 714.6(61)  | 58.6(fixed)                             | — | 0.9   | 58.6  |
| <i>u</i> <sub>2272</sub> | H(22)...C(55)   | 714.6(34)  | 28.6(fixed)                             | — | -6.9  | 28.6  |
| <i>u</i> <sub>2328</sub> | C(131)...C(159) | 714.7(71)  | 63.1(tied to <i>u</i> <sub>1727</sub> ) | — | -4.8  | 52.4  |
| <i>u</i> <sub>2268</sub> | C(11)...H(46)   | 714.9(64)  | 50.0(fixed)                             | — | -4.2  | 50.0  |
| <i>u</i> <sub>2344</sub> | Si(65)...H(112) | 715.1(55)  | 34.2(fixed)                             | — | -6.7  | 34.2  |
| <i>u</i> <sub>2300</sub> | H(76)...H(121)  | 715.2(56)  | 36.0(fixed)                             | — | -11.6 | 36.0  |
| <i>u</i> <sub>2258</sub> | C(77)...H(82)   | 715.9(25)  | 31.7(fixed)                             | — | -4.7  | 31.7  |
| <i>u</i> <sub>2041</sub> | H(88)...C(113)  | 716.1(79)  | 49.8(fixed)                             | — | 1.1   | 49.8  |
| <i>u</i> <sub>2142</sub> | H(24)...C(51)   | 716.1(87)  | 63.1(fixed)                             | — | -8.6  | 63.1  |
| <i>u</i> <sub>2342</sub> | H(72)...H(95)   | 716.4(76)  | 53.0(fixed)                             | — | -0.4  | 53.0  |
| <i>u</i> <sub>2409</sub> | H(78)...H(90)   | 716.5(56)  | 39.7(fixed)                             | — | -13.9 | 39.7  |
| <i>u</i> <sub>2124</sub> | H(141)...C(167) | 716.5(60)  | 52.8(fixed)                             | — | 1.9   | 52.8  |
| <i>u</i> <sub>2333</sub> | H(146)...H(174) | 716.8(100) | 49.6(fixed)                             | — | -3.2  | 49.6  |
| <i>u</i> <sub>2199</sub> | H(152)...H(177) | 716.9(178) | 48.9(fixed)                             | — | -10.8 | 48.9  |
| <i>u</i> <sub>2324</sub> | H(138)...H(183) | 717.0(45)  | 51.5(fixed)                             | — | -16.2 | 51.5  |
| <i>u</i> <sub>2126</sub> | H(24)...H(53)   | 717.7(117) | 77.0(fixed)                             | — | -11.8 | 77.0  |
| <i>u</i> <sub>2380</sub> | C(19)...H(44)   | 717.8(123) | 54.5(fixed)                             | — | -4.4  | 54.5  |
| <i>u</i> <sub>2241</sub> | Si(4)...H(38)   | 717.9(26)  | 31.6(fixed)                             | — | -4.8  | 31.6  |
| <i>u</i> <sub>2244</sub> | H(134)...H(178) | 718.1(83)  | 58.2(fixed)                             | — | 2.8   | 58.2  |
| <i>u</i> <sub>2351</sub> | H(148)...H(176) | 718.7(63)  | 59.2(fixed)                             | — | -4.0  | 59.2  |
| <i>u</i> <sub>2230</sub> | H(86)...H(115)  | 719.1(72)  | 80.8(fixed)                             | — | -6.0  | 80.8  |
| <i>u</i> <sub>2334</sub> | H(79)...H(83)   | 719.3(40)  | 51.5(fixed)                             | — | -5.5  | 51.5  |
| <i>u</i> <sub>2318</sub> | H(141)...H(177) | 719.3(67)  | 57.7(fixed)                             | — | 0.4   | 57.7  |
| <i>u</i> <sub>2323</sub> | H(17)...H(21)   | 719.4(35)  | 43.8(fixed)                             | — | -5.9  | 43.8  |
| <i>u</i> <sub>2066</sub> | H(25)...H(52)   | 719.5(161) | 107.0(fixed)                            | — | 0.4   | 107.0 |
| <i>u</i> <sub>2338</sub> | H(72)...H(98)   | 720.0(64)  | 64.0(fixed)                             | — | 5.6   | 64.0  |
| <i>u</i> <sub>2395</sub> | H(137)...H(183) | 720.1(48)  | 43.0(fixed)                             | — | -18.8 | 43.0  |
| <i>u</i> <sub>2132</sub> | C(77)...H(102)  | 720.2(140) | 48.5(fixed)                             | — | -1.6  | 48.5  |
| <i>u</i> <sub>2172</sub> | H(141)...H(168) | 720.2(61)  | 56.0(fixed)                             | — | 2.3   | 56.0  |
| <i>u</i> <sub>2262</sub> | H(141)...C(143) | 720.2(31)  | 29.0(fixed)                             | — | -4.0  | 29.0  |
| <i>u</i> <sub>2228</sub> | H(134)...H(170) | 720.5(81)  | 74.2(fixed)                             | — | -0.4  | 74.2  |

|                          |                 |            |                                         |   |       |      |
|--------------------------|-----------------|------------|-----------------------------------------|---|-------|------|
| <i>u</i> <sub>2356</sub> | H(140)...H(150) | 720.8(41)  | 33.5(fixed)                             | — | -13.2 | 33.5 |
| <i>u</i> <sub>2355</sub> | C(139)...H(178) | 721.4(44)  | 46.3(fixed)                             | — | -0.8  | 46.3 |
| <i>u</i> <sub>2290</sub> | C(15)...H(20)   | 721.7(25)  | 32.7(fixed)                             | — | -8.1  | 32.7 |
| <i>u</i> <sub>2306</sub> | H(10)...H(42)   | 721.7(60)  | 54.8(fixed)                             | — | 2.6   | 54.8 |
| <i>u</i> <sub>2182</sub> | H(87)...C(113)  | 721.8(100) | 45.5(fixed)                             | — | -5.5  | 45.5 |
| <i>u</i> <sub>2307</sub> | H(141)...C(175) | 722.0(47)  | 43.2(fixed)                             | — | -1.3  | 43.2 |
| <i>u</i> <sub>2219</sub> | H(29)...H(59)   | 723.0(61)  | 52.6(fixed)                             | — | -4.4  | 52.6 |
| <i>u</i> <sub>2276</sub> | H(14)...C(39)   | 723.1(69)  | 59.4(fixed)                             | — | 2.6   | 59.4 |
| <i>u</i> <sub>2243</sub> | H(90)...H(119)  | 723.2(60)  | 41.8(fixed)                             | — | -6.4  | 41.8 |
| <i>u</i> <sub>2287</sub> | H(149)...C(175) | 723.2(69)  | 38.3(fixed)                             | — | -4.9  | 38.3 |
| <i>u</i> <sub>2376</sub> | H(80)...H(110)  | 723.7(117) | 65.8(fixed)                             | — | 2.3   | 65.8 |
| <i>u</i> <sub>2240</sub> | C(69)...H(103)  | 723.7(97)  | 57.7(fixed)                             | — | 0.0   | 57.7 |
| <i>u</i> <sub>2291</sub> | Si(4)...H(48)   | 723.9(30)  | 37.8(fixed)                             | — | -10.1 | 37.8 |
| <i>u</i> <sub>2279</sub> | H(140)...H(145) | 724.0(50)  | 45.6(fixed)                             | — | -1.4  | 45.6 |
| <i>u</i> <sub>2371</sub> | C(69)...H(95)   | 724.0(60)  | 44.5(fixed)                             | — | -0.9  | 44.5 |
| <i>u</i> <sub>2312</sub> | H(20)...H(48)   | 724.1(37)  | 68.1(fixed)                             | — | 3.6   | 68.1 |
| <i>u</i> <sub>2299</sub> | H(84)...C(117)  | 724.3(30)  | 28.4(fixed)                             | — | -8.6  | 28.4 |
| <i>u</i> <sub>2292</sub> | H(79)...H(82)   | 725.0(37)  | 43.5(fixed)                             | — | -2.4  | 43.5 |
| <i>u</i> <sub>2302</sub> | H(8)...H(50)    | 725.3(87)  | 73.8(fixed)                             | — | -11.1 | 73.8 |
| <i>u</i> <sub>2315</sub> | C(7)...H(42)    | 725.5(53)  | 41.8(fixed)                             | — | 1.8   | 41.8 |
| <i>u</i> <sub>2379</sub> | H(70)...H(95)   | 725.6(72)  | 54.0(fixed)                             | — | 0.8   | 54.0 |
| <i>u</i> <sub>2266</sub> | H(132)...H(178) | 726.5(105) | 53.3(fixed)                             | — | 6.4   | 53.3 |
| <i>u</i> <sub>2325</sub> | H(71)...C(81)   | 726.6(56)  | 33.6(fixed)                             | — | -10.0 | 33.6 |
| <i>u</i> <sub>2319</sub> | C(69)...C(101)  | 726.7(78)  | 47.5(tied to <i>u</i> <sub>1727</sub> ) | — | -3.1  | 39.5 |
| <i>u</i> <sub>2303</sub> | H(140)...C(143) | 726.8(28)  | 30.4(fixed)                             | — | -4.4  | 30.4 |
| <i>u</i> <sub>2352</sub> | H(133)...H(144) | 727.3(64)  | 31.8(fixed)                             | — | -10.3 | 31.8 |
| <i>u</i> <sub>2388</sub> | H(75)...H(121)  | 727.5(58)  | 34.9(fixed)                             | — | -13.0 | 34.9 |
| <i>u</i> <sub>2340</sub> | H(140)...H(177) | 727.7(76)  | 62.8(fixed)                             | — | 2.4   | 62.8 |
| <i>u</i> <sub>2297</sub> | C(131)...H(178) | 727.8(78)  | 42.9(fixed)                             | — | 1.4   | 42.9 |
| <i>u</i> <sub>2347</sub> | H(137)...H(168) | 728.1(82)  | 49.4(fixed)                             | — | 6.8   | 49.4 |
| <i>u</i> <sub>2454</sub> | H(79)...H(88)   | 728.3(38)  | 36.6(fixed)                             | — | -16.7 | 36.6 |
| <i>u</i> <sub>2354</sub> | H(17)...H(20)   | 728.3(40)  | 41.8(fixed)                             | — | -4.0  | 41.8 |
| <i>u</i> <sub>2249</sub> | H(153)...H(177) | 728.3(162) | 47.3(fixed)                             | — | -11.4 | 47.3 |
| <i>u</i> <sub>2317</sub> | H(133)...H(169) | 728.7(80)  | 83.1(fixed)                             | — | -4.0  | 83.1 |
| <i>u</i> <sub>2296</sub> | H(78)...H(82)   | 728.7(34)  | 43.4(fixed)                             | — | -4.8  | 43.4 |
| <i>u</i> <sub>2222</sub> | H(16)...H(53)   | 729.1(88)  | 54.7(fixed)                             | — | -14.6 | 54.7 |
| <i>u</i> <sub>2280</sub> | H(90)...C(117)  | 729.1(37)  | 30.6(fixed)                             | — | -8.7  | 30.6 |
| <i>u</i> <sub>2294</sub> | H(79)...C(113)  | 729.2(84)  | 44.4(fixed)                             | — | -1.1  | 44.4 |
| <i>u</i> <sub>2439</sub> | H(70)...H(96)   | 729.2(112) | 56.9(fixed)                             | — | 0.1   | 56.9 |
| <i>u</i> <sub>2432</sub> | H(134)...H(157) | 729.3(101) | 54.2(fixed)                             | — | -4.4  | 54.2 |
| <i>u</i> <sub>2305</sub> | H(72)...H(84)   | 729.3(74)  | 60.3(fixed)                             | — | -10.2 | 60.3 |
| <i>u</i> <sub>2331</sub> | H(74)...H(83)   | 729.7(54)  | 37.0(fixed)                             | — | -9.0  | 37.0 |
| <i>u</i> <sub>2320</sub> | H(28)...C(55)   | 730.0(29)  | 32.9(fixed)                             | — | -9.8  | 32.9 |
| <i>u</i> <sub>2337</sub> | H(133)...H(145) | 730.7(56)  | 36.0(fixed)                             | — | -11.8 | 36.0 |
| <i>u</i> <sub>2329</sub> | C(139)...H(144) | 731.1(28)  | 27.1(fixed)                             | — | -3.5  | 27.1 |
| <i>u</i> <sub>2367</sub> | H(142)...H(150) | 731.1(63)  | 39.4(fixed)                             | — | -12.7 | 39.4 |

|                          |                  |            |                                         |   |       |      |
|--------------------------|------------------|------------|-----------------------------------------|---|-------|------|
| <i>u</i> <sub>2271</sub> | Si(65)...H(102)  | 731.2(77)  | 33.1(fixed)                             | — | -6.5  | 33.1 |
| <i>u</i> <sub>2353</sub> | H(134)...C(171)  | 731.3(69)  | 66.6(fixed)                             | — | 4.4   | 66.6 |
| <i>u</i> <sub>2304</sub> | H(8)...H(42)     | 731.3(73)  | 56.1(fixed)                             | — | 6.2   | 56.1 |
| <i>u</i> <sub>2382</sub> | H(75)...C(113)   | 731.5(122) | 55.7(fixed)                             | — | -0.2  | 55.7 |
| <i>u</i> <sub>2231</sub> | H(16)...H(52)    | 731.5(96)  | 59.2(fixed)                             | — | -15.1 | 59.2 |
| <i>u</i> <sub>2375</sub> | H(17)...H(28)    | 731.7(62)  | 47.2(fixed)                             | — | -8.9  | 47.2 |
| <i>u</i> <sub>2414</sub> | H(80)...H(108)   | 731.7(148) | 57.7(fixed)                             | — | -9.3  | 57.7 |
| <i>u</i> <sub>2363</sub> | H(141)...H(150)  | 731.9(53)  | 38.0(fixed)                             | — | -13.0 | 38.0 |
| <i>u</i> <sub>2410</sub> | Si(66)...H(100)  | 731.9(54)  | 33.9(fixed)                             | — | -7.4  | 33.9 |
| <i>u</i> <sub>2237</sub> | Si(66)...H(112)  | 732.1(45)  | 28.5(fixed)                             | — | -4.1  | 28.5 |
| <i>u</i> <sub>2349</sub> | H(8)...H(49)     | 732.5(88)  | 82.8(fixed)                             | — | -9.4  | 82.8 |
| <i>u</i> <sub>2264</sub> | H(18)...H(53)    | 733.1(100) | 62.0(fixed)                             | — | -15.3 | 62.0 |
| <i>u</i> <sub>2444</sub> | C(131)...H(157)  | 733.3(93)  | 47.3(fixed)                             | — | -4.7  | 47.3 |
| <i>u</i> <sub>2346</sub> | H(79)...H(112)   | 733.4(113) | 61.6(fixed)                             | — | 0.2   | 61.6 |
| <i>u</i> <sub>2221</sub> | C(23)...H(52)    | 733.7(106) | 76.6(fixed)                             | — | -6.8  | 76.6 |
| <i>u</i> <sub>2361</sub> | H(133)...H(161)  | 733.9(89)  | 83.5(fixed)                             | — | 0.2   | 83.5 |
| <i>u</i> <sub>2430</sub> | H(133)...H(164)  | 734.0(157) | 47.0(fixed)                             | — | -8.5  | 47.0 |
| <i>u</i> <sub>2343</sub> | Si(65)...C(97)   | 734.1(30)  | 27.2(tied to <i>u</i> <sub>1727</sub> ) | — | -5.1  | 22.6 |
| <i>u</i> <sub>2234</sub> | H(88)...H(115)   | 734.1(107) | 76.3(fixed)                             | — | -4.6  | 76.3 |
| <i>u</i> <sub>2429</sub> | H(13)...H(59)    | 734.4(53)  | 37.7(fixed)                             | — | -12.8 | 37.7 |
| <i>u</i> <sub>2424</sub> | H(80)...H(88)    | 734.5(56)  | 39.7(fixed)                             | — | -13.8 | 39.7 |
| <i>u</i> <sub>2359</sub> | Si(3)...H(37)    | 734.7(42)  | 42.0(fixed)                             | — | -2.0  | 42.0 |
| <i>u</i> <sub>2335</sub> | H(141)...H(144)  | 734.9(48)  | 38.4(fixed)                             | — | -0.6  | 38.4 |
| <i>u</i> <sub>2301</sub> | H(79)...H(116)   | 734.9(98)  | 52.5(fixed)                             | — | -1.3  | 52.5 |
| <i>u</i> <sub>2369</sub> | Si(3)...C(35)    | 734.9(27)  | 26.4(tied to <i>u</i> <sub>1727</sub> ) | — | -4.6  | 21.9 |
| <i>u</i> <sub>2394</sub> | H(74)...H(121)   | 735.0(71)  | 35.1(fixed)                             | — | -11.5 | 35.1 |
| <i>u</i> <sub>2525</sub> | H(71)...H(111)   | 735.0(86)  | 69.9(fixed)                             | — | -14.8 | 69.9 |
| <i>u</i> <sub>2378</sub> | H(71)...H(82)    | 735.0(79)  | 41.1(fixed)                             | — | -7.6  | 41.1 |
| <i>u</i> <sub>2281</sub> | C(81)...H(110)   | 735.3(77)  | 40.1(fixed)                             | — | -6.8  | 40.1 |
| <i>u</i> <sub>2350</sub> | H(78)...H(110)   | 735.7(105) | 70.0(fixed)                             | — | -2.2  | 70.0 |
| <i>u</i> <sub>2455</sub> | H(9)...H(20)     | 735.9(57)  | 41.1(fixed)                             | — | -19.4 | 41.1 |
| <i>u</i> <sub>2420</sub> | H(8)...H(48)     | 736.2(82)  | 58.2(fixed)                             | — | -15.5 | 58.2 |
| <i>u</i> <sub>2397</sub> | H(12)...H(22)    | 736.3(64)  | 45.9(fixed)                             | — | -16.5 | 45.9 |
| <i>u</i> <sub>2385</sub> | C(19)...C(47)    | 736.5(39)  | 55.0(tied to <i>u</i> <sub>1727</sub> ) | — | -4.5  | 45.7 |
| <i>u</i> <sub>2314</sub> | H(133)...H(168)  | 736.6(78)  | 54.8(fixed)                             | — | -3.4  | 54.8 |
| <i>u</i> <sub>2322</sub> | Si(65)...H(99)   | 736.9(40)  | 40.8(fixed)                             | — | -3.1  | 40.8 |
| <i>u</i> <sub>2384</sub> | H(9)...H(21)     | 737.0(51)  | 43.5(fixed)                             | — | -17.5 | 43.5 |
| <i>u</i> <sub>2427</sub> | H(12)...H(59)    | 737.0(69)  | 39.3(fixed)                             | — | -12.1 | 39.3 |
| <i>u</i> <sub>2327</sub> | H(16)...H(20)    | 737.2(36)  | 52.8(fixed)                             | — | -5.9  | 52.8 |
| <i>u</i> <sub>2365</sub> | H(141)...H(145)  | 737.7(31)  | 40.9(fixed)                             | — | -5.2  | 40.9 |
| <i>u</i> <sub>2426</sub> | H(136)...H(183)  | 737.9(53)  | 55.8(fixed)                             | — | -18.0 | 55.8 |
| <i>u</i> <sub>2372</sub> | H(133)...H(146)  | 738.1(72)  | 38.1(fixed)                             | — | -10.2 | 38.1 |
| <i>u</i> <sub>2232</sub> | C(81)...H(112)   | 738.3(98)  | 45.6(fixed)                             | — | -2.1  | 45.6 |
| <i>u</i> <sub>2422</sub> | H(79)...H(90)    | 738.6(43)  | 37.5(fixed)                             | — | -14.2 | 37.5 |
| <i>u</i> <sub>2490</sub> | H(74)...H(108)   | 738.9(99)  | 60.7(fixed)                             | — | -8.1  | 60.7 |
| <i>u</i> <sub>2370</sub> | Si(127)...C(171) | 739.0(19)  | 28.1(tied to <i>u</i> <sub>1727</sub> ) | — | -4.3  | 23.3 |

|                          |                  |            |                                         |   |       |      |
|--------------------------|------------------|------------|-----------------------------------------|---|-------|------|
| <i>u</i> <sub>2366</sub> | H(134)...C(175)  | 739.0(62)  | 53.2(fixed)                             | — | -1.2  | 53.2 |
| <i>u</i> <sub>2387</sub> | Si(128)...C(159) | 739.2(17)  | 23.6(tied to <i>u</i> <sub>1727</sub> ) | — | -5.4  | 19.6 |
| <i>u</i> <sub>2400</sub> | H(17)...H(26)    | 739.2(41)  | 34.2(fixed)                             | — | -10.5 | 34.2 |
| <i>u</i> <sub>2461</sub> | H(146)...H(172)  | 739.2(122) | 46.9(fixed)                             | — | -8.5  | 46.9 |
| <i>u</i> <sub>2453</sub> | C(19)...C(43)    | 739.7(100) | 48.0(tied to <i>u</i> <sub>1727</sub> ) | — | -7.5  | 39.9 |
| <i>u</i> <sub>2293</sub> | H(137)...H(164)  | 739.8(113) | 66.9(fixed)                             | — | -10.0 | 66.9 |
| <i>u</i> <sub>2390</sub> | H(16)...H(50)    | 740.1(99)  | 72.3(fixed)                             | — | -14.9 | 72.3 |
| <i>u</i> <sub>2399</sub> | H(9)...H(50)     | 740.4(72)  | 68.5(fixed)                             | — | -10.8 | 68.5 |
| <i>u</i> <sub>2263</sub> | C(139)...H(169)  | 740.8(60)  | 64.1(fixed)                             | — | -0.7  | 64.1 |
| <i>u</i> <sub>2423</sub> | H(74)...H(82)    | 741.0(47)  | 31.5(fixed)                             | — | -10.8 | 31.5 |
| <i>u</i> <sub>2401</sub> | H(140)...C(175)  | 741.1(54)  | 46.2(fixed)                             | — | -2.1  | 46.2 |
| <i>u</i> <sub>2368</sub> | Si(127)...H(172) | 742.2(33)  | 43.0(fixed)                             | — | -1.4  | 43.0 |
| <i>u</i> <sub>2402</sub> | H(18)...H(26)    | 742.2(53)  | 38.5(fixed)                             | — | -8.8  | 38.5 |
| <i>u</i> <sub>2357</sub> | C(11)...H(41)    | 742.4(80)  | 69.6(fixed)                             | — | -1.7  | 69.6 |
| <i>u</i> <sub>2498</sub> | H(134)...H(162)  | 743.0(99)  | 69.9(fixed)                             | — | -3.7  | 69.9 |
| <i>u</i> <sub>2437</sub> | H(74)...H(84)    | 743.1(56)  | 35.4(fixed)                             | — | -11.4 | 35.4 |
| <i>u</i> <sub>2456</sub> | C(69)...C(93)    | 743.5(52)  | 36.5(tied to <i>u</i> <sub>1727</sub> ) | — | -4.4  | 30.3 |
| <i>u</i> <sub>2478</sub> | C(69)...H(96)    | 743.5(76)  | 43.9(fixed)                             | — | -3.3  | 43.9 |
| <i>u</i> <sub>2383</sub> | H(12)...H(46)    | 744.0(72)  | 59.8(fixed)                             | — | -1.4  | 59.8 |
| <i>u</i> <sub>2406</sub> | C(135)...H(168)  | 744.1(64)  | 38.4(fixed)                             | — | 1.7   | 38.4 |
| <i>u</i> <sub>2417</sub> | H(16)...H(49)    | 744.1(86)  | 63.9(fixed)                             | — | -14.8 | 63.9 |
| <i>u</i> <sub>2330</sub> | C(139)...H(168)  | 744.2(46)  | 44.6(fixed)                             | — | -0.9  | 44.6 |
| <i>u</i> <sub>2419</sub> | Si(128)...H(161) | 744.4(33)  | 35.9(fixed)                             | — | -4.0  | 35.9 |
| <i>u</i> <sub>2396</sub> | C(11)...C(39)    | 744.7(54)  | 47.0(tied to <i>u</i> <sub>1727</sub> ) | — | -3.1  | 39.0 |
| <i>u</i> <sub>2405</sub> | C(139)...H(177)  | 744.8(61)  | 50.4(fixed)                             | — | -2.1  | 50.4 |
| <i>u</i> <sub>2416</sub> | H(70)...H(104)   | 745.1(72)  | 52.1(fixed)                             | — | -3.3  | 52.1 |
| <i>u</i> <sub>2412</sub> | C(139)...C(175)  | 745.2(38)  | 37.0(tied to <i>u</i> <sub>1727</sub> ) | — | -4.2  | 30.8 |
| <i>u</i> <sub>2492</sub> | H(9)...H(48)     | 745.6(87)  | 63.8(fixed)                             | — | -13.9 | 63.8 |
| <i>u</i> <sub>2487</sub> | H(71)...H(114)   | 745.9(150) | 52.4(fixed)                             | — | -8.5  | 52.4 |
| <i>u</i> <sub>2415</sub> | H(136)...H(146)  | 746.2(65)  | 42.5(fixed)                             | — | -10.5 | 42.5 |
| <i>u</i> <sub>2411</sub> | H(10)...C(39)    | 746.4(47)  | 47.1(fixed)                             | — | -2.3  | 47.1 |
| <i>u</i> <sub>2436</sub> | H(12)...H(20)    | 746.5(42)  | 39.9(fixed)                             | — | -19.9 | 39.9 |
| <i>u</i> <sub>2441</sub> | H(22)...H(52)    | 747.4(102) | 58.2(fixed)                             | — | -9.4  | 58.2 |
| <i>u</i> <sub>2480</sub> | H(132)...H(161)  | 747.4(70)  | 68.0(fixed)                             | — | -5.3  | 68.0 |
| <i>u</i> <sub>2466</sub> | H(18)...H(50)    | 747.6(85)  | 66.5(fixed)                             | — | -12.6 | 66.5 |
| <i>u</i> <sub>2374</sub> | C(77)...H(116)   | 747.6(101) | 46.3(fixed)                             | — | -2.4  | 46.3 |
| <i>u</i> <sub>2283</sub> | C(11)...H(53)    | 747.7(108) | 68.0(fixed)                             | — | -8.8  | 68.0 |
| <i>u</i> <sub>2499</sub> | H(80)...H(90)    | 748.6(65)  | 42.1(fixed)                             | — | -13.1 | 42.1 |
| <i>u</i> <sub>2503</sub> | C(131)...C(155)  | 749.7(84)  | 38.9(tied to <i>u</i> <sub>1727</sub> ) | — | -7.9  | 32.3 |
| <i>u</i> <sub>2434</sub> | H(142)...H(152)  | 749.9(79)  | 41.9(fixed)                             | — | -11.7 | 41.9 |
| <i>u</i> <sub>2445</sub> | Si(3)...H(40)    | 749.9(43)  | 29.4(fixed)                             | — | -11.2 | 29.4 |
| <i>u</i> <sub>2408</sub> | H(10)...H(36)    | 750.2(90)  | 61.8(fixed)                             | — | 10.3  | 61.8 |
| <i>u</i> <sub>2386</sub> | H(87)...H(115)   | 751.0(118) | 66.7(fixed)                             | — | -12.7 | 66.7 |
| <i>u</i> <sub>2459</sub> | H(84)...H(120)   | 751.6(42)  | 32.5(fixed)                             | — | -9.8  | 32.5 |
| <i>u</i> <sub>2510</sub> | H(21)...H(49)    | 751.8(53)  | 70.7(fixed)                             | — | -5.4  | 70.7 |
| <i>u</i> <sub>2451</sub> | H(132)...H(170)  | 751.9(86)  | 57.9(fixed)                             | — | -6.0  | 57.9 |

|                          |                  |            |                     |   |       |      |
|--------------------------|------------------|------------|---------------------|---|-------|------|
| <i>u</i> <sub>2364</sub> | C(139)...C(167)  | 752.1(43)  | 47.7(tied to u1727) | — | -3.8  | 39.6 |
| <i>u</i> <sub>2458</sub> | C(77)...H(111)   | 752.5(80)  | 58.7(fixed)         | — | -6.4  | 58.7 |
| <i>u</i> <sub>2431</sub> | Si(3)...H(36)    | 752.7(36)  | 35.9(fixed)         | — | -3.3  | 35.9 |
| <i>u</i> <sub>2278</sub> | C(85)...H(114)   | 752.8(77)  | 50.1(fixed)         | — | -8.0  | 50.1 |
| <i>u</i> <sub>2289</sub> | H(13)...H(53)    | 752.8(124) | 78.8(fixed)         | — | -4.1  | 78.8 |
| <i>u</i> <sub>2341</sub> | H(84)...C(109)   | 753.0(77)  | 53.3(fixed)         | — | -6.7  | 53.3 |
| <i>u</i> <sub>2403</sub> | H(76)...H(116)   | 753.1(126) | 63.2(fixed)         | — | 3.1   | 63.2 |
| <i>u</i> <sub>2389</sub> | Si(4)...H(50)    | 753.2(41)  | 42.5(fixed)         | — | -10.5 | 42.5 |
| <i>u</i> <sub>2467</sub> | C(73)...C(113)   | 753.8(101) | 49.2(tied to u1727) | — | -4.6  | 40.9 |
| <i>u</i> <sub>2418</sub> | C(77)...C(113)   | 753.9(76)  | 39.7(tied to u1727) | — | -5.5  | 33.0 |
| <i>u</i> <sub>2443</sub> | H(150)...H(176)  | 754.1(91)  | 57.5(fixed)         | — | -5.2  | 57.5 |
| <i>u</i> <sub>2438</sub> | Si(128)...H(160) | 754.2(37)  | 35.3(fixed)         | — | -4.8  | 35.3 |
| <i>u</i> <sub>2485</sub> | H(9)...H(22)     | 754.9(64)  | 46.1(fixed)         | — | -17.7 | 46.1 |
| <i>u</i> <sub>2464</sub> | Si(128)...H(156) | 755.4(39)  | 42.1(fixed)         | — | -10.6 | 42.1 |
| <i>u</i> <sub>2477</sub> | H(146)...H(173)  | 755.4(64)  | 39.7(fixed)         | — | -8.5  | 39.7 |
| <i>u</i> <sub>2463</sub> | H(28)...H(57)    | 755.6(26)  | 34.4(fixed)         | — | -10.6 | 34.4 |
| <i>u</i> <sub>2421</sub> | H(140)...H(144)  | 756.1(31)  | 38.3(fixed)         | — | -3.7  | 38.3 |
| <i>u</i> <sub>2473</sub> | H(136)...H(144)  | 756.3(42)  | 34.3(fixed)         | — | -12.1 | 34.3 |
| <i>u</i> <sub>2505</sub> | H(138)...C(175)  | 756.3(59)  | 55.8(fixed)         | — | -1.4  | 55.8 |
| <i>u</i> <sub>2476</sub> | C(69)...H(99)    | 756.7(55)  | 58.7(fixed)         | — | -1.3  | 58.7 |
| <i>u</i> <sub>2440</sub> | H(13)...C(39)    | 756.7(63)  | 51.4(fixed)         | — | -1.7  | 51.4 |
| <i>u</i> <sub>2544</sub> | H(21)...H(52)    | 756.8(99)  | 51.9(fixed)         | — | -19.1 | 51.9 |
| <i>u</i> <sub>2484</sub> | Si(65)...H(94)   | 756.9(45)  | 34.0(fixed)         | — | -8.2  | 34.0 |
| <i>u</i> <sub>2433</sub> | Si(127)...H(173) | 757.3(25)  | 36.7(fixed)         | — | -3.0  | 36.7 |
| <i>u</i> <sub>2520</sub> | H(148)...H(183)  | 757.9(33)  | 36.1(fixed)         | — | -15.8 | 36.1 |
| <i>u</i> <sub>2450</sub> | Si(127)...H(170) | 758.0(38)  | 29.5(fixed)         | — | -9.9  | 29.5 |
| <i>u</i> <sub>2468</sub> | Si(65)...H(98)   | 758.4(36)  | 31.3(fixed)         | — | -6.5  | 31.3 |
| <i>u</i> <sub>2358</sub> | H(14)...C(51)    | 758.5(72)  | 51.2(fixed)         | — | -6.9  | 51.2 |
| <i>u</i> <sub>2447</sub> | H(28)...H(58)    | 758.7(39)  | 37.9(fixed)         | — | -10.9 | 37.9 |
| <i>u</i> <sub>2488</sub> | H(140)...H(152)  | 759.4(50)  | 34.4(fixed)         | — | -13.3 | 34.4 |
| <i>u</i> <sub>2326</sub> | H(12)...C(51)    | 759.5(90)  | 63.0(fixed)         | — | -3.9  | 63.0 |
| <i>u</i> <sub>2284</sub> | H(76)...C(101)   | 759.8(90)  | 57.1(fixed)         | — | 1.9   | 57.1 |
| <i>u</i> <sub>2465</sub> | C(131)...C(175)  | 760.5(54)  | 38.2(tied to u1727) | — | -5.0  | 31.7 |
| <i>u</i> <sub>2469</sub> | C(7)...C(39)     | 760.6(40)  | 35.8(tied to u1727) | — | -5.6  | 29.7 |
| <i>u</i> <sub>2446</sub> | H(84)...H(119)   | 760.9(42)  | 35.0(fixed)         | — | -9.2  | 35.0 |
| <i>u</i> <sub>2475</sub> | H(10)...C(35)    | 761.2(70)  | 52.6(fixed)         | — | 3.0   | 52.6 |
| <i>u</i> <sub>2537</sub> | H(26)...H(58)    | 761.3(50)  | 38.5(fixed)         | — | -10.3 | 38.5 |
| <i>u</i> <sub>2489</sub> | H(138)...H(177)  | 761.7(90)  | 75.8(fixed)         | — | 1.2   | 75.8 |
| <i>u</i> <sub>2509</sub> | H(20)...H(50)    | 762.0(71)  | 67.7(fixed)         | — | -1.7  | 67.7 |
| <i>u</i> <sub>2381</sub> | C(139)...H(172)  | 762.0(56)  | 59.4(fixed)         | — | 1.2   | 59.4 |
| <i>u</i> <sub>2362</sub> | H(75)...H(104)   | 762.3(85)  | 56.4(fixed)         | — | 2.4   | 56.4 |
| <i>u</i> <sub>2449</sub> | H(13)...H(41)    | 762.9(92)  | 77.5(fixed)         | — | -3.6  | 77.5 |
| <i>u</i> <sub>2530</sub> | H(20)...H(45)    | 762.9(104) | 54.9(fixed)         | — | -5.6  | 54.9 |
| <i>u</i> <sub>2391</sub> | H(84)...H(111)   | 763.6(51)  | 65.0(fixed)         | — | -5.8  | 65.0 |
| <i>u</i> <sub>2561</sub> | H(76)...H(108)   | 763.7(72)  | 55.0(fixed)         | — | -14.2 | 55.0 |
| <i>u</i> <sub>2471</sub> | H(79)...H(115)   | 764.4(68)  | 47.8(fixed)         | — | -2.1  | 47.8 |

|                          |                  |            |                                         |   |       |      |
|--------------------------|------------------|------------|-----------------------------------------|---|-------|------|
| <i>u</i> <sub>2500</sub> | H(22)...H(57)    | 764.4(37)  | 33.5(fixed)                             | — | -9.9  | 33.5 |
| <i>u</i> <sub>2507</sub> | H(70)...C(101)   | 765.7(66)  | 45.7(fixed)                             | — | -7.3  | 45.7 |
| <i>u</i> <sub>2529</sub> | H(16)...H(28)    | 765.8(41)  | 40.9(fixed)                             | — | -17.4 | 40.9 |
| <i>u</i> <sub>2462</sub> | Si(128)...H(164) | 766.1(34)  | 32.2(fixed)                             | — | -8.0  | 32.2 |
| <i>u</i> <sub>2470</sub> | H(133)...C(167)  | 766.3(65)  | 54.6(fixed)                             | — | -8.8  | 54.6 |
| <i>u</i> <sub>2532</sub> | H(26)...C(55)    | 766.5(28)  | 22.1(fixed)                             | — | -12.1 | 22.1 |
| <i>u</i> <sub>2479</sub> | H(83)...H(110)   | 766.5(86)  | 56.2(fixed)                             | — | -11.1 | 56.2 |
| <i>u</i> <sub>2502</sub> | H(13)...H(46)    | 766.5(72)  | 52.1(fixed)                             | — | -6.9  | 52.1 |
| <i>u</i> <sub>2486</sub> | H(132)...C(175)  | 766.7(79)  | 44.4(fixed)                             | — | -2.4  | 44.4 |
| <i>u</i> <sub>2517</sub> | Si(127)...H(176) | 766.8(34)  | 30.2(fixed)                             | — | -10.7 | 30.2 |
| <i>u</i> <sub>2541</sub> | H(138)...H(168)  | 767.0(79)  | 46.6(fixed)                             | — | -0.4  | 46.6 |
| <i>u</i> <sub>2524</sub> | C(69)...C(97)    | 767.2(43)  | 50.8(tied to <i>u</i> <sub>1727</sub> ) | — | -4.3  | 42.2 |
| <i>u</i> <sub>2587</sub> | H(71)...H(115)   | 767.8(115) | 44.0(fixed)                             | — | -15.6 | 44.0 |
| <i>u</i> <sub>2514</sub> | H(78)...H(108)   | 768.0(107) | 53.3(fixed)                             | — | -16.7 | 53.3 |
| <i>u</i> <sub>2435</sub> | C(139)...H(173)  | 768.4(57)  | 49.5(fixed)                             | — | 0.2   | 49.5 |
| <i>u</i> <sub>2428</sub> | C(139)...C(171)  | 768.8(49)  | 45.7(tied to <i>u</i> <sub>1727</sub> ) | — | -2.9  | 37.9 |
| <i>u</i> <sub>2482</sub> | C(131)...H(170)  | 768.9(65)  | 49.5(fixed)                             | — | -8.4  | 49.5 |
| <i>u</i> <sub>2442</sub> | H(150)...H(177)  | 769.6(102) | 54.6(fixed)                             | — | -8.4  | 54.6 |
| <i>u</i> <sub>2413</sub> | H(140)...H(173)  | 769.6(78)  | 60.5(fixed)                             | — | 2.7   | 60.5 |
| <i>u</i> <sub>2513</sub> | C(131)...H(160)  | 769.7(59)  | 65.5(fixed)                             | — | -8.4  | 65.5 |
| <i>u</i> <sub>2523</sub> | H(134)...H(173)  | 769.8(71)  | 70.1(fixed)                             | — | 0.9   | 70.1 |
| <i>u</i> <sub>2504</sub> | H(14)...H(46)    | 769.8(60)  | 51.8(fixed)                             | — | -8.2  | 51.8 |
| <i>u</i> <sub>2571</sub> | H(24)...H(59)    | 770.1(37)  | 40.9(fixed)                             | — | -10.6 | 40.9 |
| <i>u</i> <sub>2559</sub> | H(80)...C(109)   | 770.2(92)  | 50.9(fixed)                             | — | -6.9  | 50.9 |
| <i>u</i> <sub>2493</sub> | H(70)...H(103)   | 770.3(86)  | 61.3(fixed)                             | — | -6.6  | 61.3 |
| <i>u</i> <sub>2495</sub> | H(10)...H(41)    | 771.1(51)  | 58.8(fixed)                             | — | -4.4  | 58.8 |
| <i>u</i> <sub>2540</sub> | H(9)...H(33)     | 771.2(81)  | 71.3(fixed)                             | — | -5.1  | 71.3 |
| <i>u</i> <sub>2491</sub> | H(78)...C(109)   | 771.2(83)  | 58.3(fixed)                             | — | -8.5  | 58.3 |
| <i>u</i> <sub>2407</sub> | C(11)...H(52)    | 771.3(80)  | 69.0(fixed)                             | — | -7.9  | 69.0 |
| <i>u</i> <sub>2549</sub> | C(23)...H(59)    | 771.3(23)  | 20.5(fixed)                             | — | -11.2 | 20.5 |
| <i>u</i> <sub>2496</sub> | H(90)...H(120)   | 771.5(36)  | 33.4(fixed)                             | — | -10.9 | 33.4 |
| <i>u</i> <sub>2584</sub> | H(18)...H(28)    | 771.5(67)  | 56.7(fixed)                             | — | -16.9 | 56.7 |
| <i>u</i> <sub>2392</sub> | C(73)...C(101)   | 771.6(75)  | 47.5(tied to <i>u</i> <sub>1727</sub> ) | — | -2.5  | 39.5 |
| <i>u</i> <sub>2564</sub> | H(132)...H(164)  | 771.8(115) | 37.8(fixed)                             | — | -12.9 | 37.8 |
| <i>u</i> <sub>2533</sub> | C(135)...C(175)  | 772.5(49)  | 49.3(tied to <i>u</i> <sub>1727</sub> ) | — | -4.7  | 41.0 |
| <i>u</i> <sub>2516</sub> | C(131)...H(172)  | 772.6(72)  | 60.6(fixed)                             | — | 0.7   | 60.6 |
| <i>u</i> <sub>2616</sub> | H(70)...H(98)    | 772.8(92)  | 66.2(fixed)                             | — | -4.3  | 66.2 |
| <i>u</i> <sub>2600</sub> | H(70)...H(99)    | 773.0(84)  | 71.3(fixed)                             | — | -6.3  | 71.3 |
| <i>u</i> <sub>2536</sub> | Si(3)...H(32)    | 773.4(35)  | 33.6(fixed)                             | — | -11.5 | 33.6 |
| <i>u</i> <sub>2535</sub> | C(77)...H(84)    | 773.7(20)  | 22.2(fixed)                             | — | -12.3 | 22.2 |
| <i>u</i> <sub>2506</sub> | H(8)...C(39)     | 774.7(55)  | 47.4(fixed)                             | — | -4.0  | 47.4 |
| <i>u</i> <sub>2591</sub> | H(21)...C(47)    | 774.7(60)  | 55.7(fixed)                             | — | -10.6 | 55.7 |
| <i>u</i> <sub>2546</sub> | H(88)...C(117)   | 774.9(24)  | 20.1(fixed)                             | — | -9.4  | 20.1 |
| <i>u</i> <sub>2552</sub> | H(78)...H(84)    | 775.3(39)  | 38.8(fixed)                             | — | -11.0 | 38.8 |
| <i>u</i> <sub>2497</sub> | H(149)...H(177)  | 775.3(86)  | 55.7(fixed)                             | — | -9.1  | 55.7 |
| <i>u</i> <sub>2553</sub> | C(85)...H(121)   | 775.8(21)  | 20.1(fixed)                             | — | -9.0  | 20.1 |

|                          |                 |            |                             |   |       |      |
|--------------------------|-----------------|------------|-----------------------------|---|-------|------|
| <i>u</i> <sub>2543</sub> | H(9)...H(49)    | 775.9(60)  | 62.0(fixed)                 | — | -15.9 | 62.0 |
| <i>u</i> <sub>2566</sub> | C(69)...H(98)   | 776.2(58)  | 50.1(fixed)                 | — | -3.7  | 50.1 |
| <i>u</i> <sub>2602</sub> | H(150)...H(183) | 776.5(44)  | 43.1(fixed)                 | — | -17.7 | 43.1 |
| <i>u</i> <sub>2582</sub> | H(88)...H(120)  | 777.5(46)  | 33.4(fixed)                 | — | -9.6  | 33.4 |
| <i>u</i> <sub>2614</sub> | H(70)...C(97)   | 777.7(73)  | 57.8(fixed)                 | — | -7.0  | 57.8 |
| <i>u</i> <sub>2575</sub> | H(86)...H(121)  | 777.8(38)  | 34.3(fixed)                 | — | -7.7  | 34.3 |
| <i>u</i> <sub>2527</sub> | H(18)...C(19)   | 778.0(21)  | 24.1(fixed)                 | — | -13.4 | 24.1 |
| <i>u</i> <sub>2526</sub> | H(134)...H(177) | 778.4(61)  | 58.5(fixed)                 | — | -4.5  | 58.5 |
| <i>u</i> <sub>2558</sub> | H(133)...C(159) | 778.8(87)  | 65.9(fixed)                 | — | -9.0  | 65.9 |
| <i>u</i> <sub>2556</sub> | C(19)...H(48)   | 779.0(29)  | 52.7(fixed)                 | — | -7.4  | 52.7 |
| <i>u</i> <sub>2531</sub> | C(15)...H(22)   | 779.1(20)  | 22.6(fixed)                 | — | -11.4 | 22.6 |
| <i>u</i> <sub>2538</sub> | H(10)...H(37)   | 779.2(80)  | 62.6(fixed)                 | — | 1.2   | 62.6 |
| <i>u</i> <sub>2592</sub> | H(132)...H(157) | 779.5(78)  | 54.8(fixed)                 | — | -3.9  | 54.8 |
| <i>u</i> <sub>2588</sub> | H(26)...H(57)   | 779.5(41)  | 34.8(fixed)                 | — | -11.3 | 34.8 |
| <i>u</i> <sub>2542</sub> | H(80)...C(81)   | 780.6(19)  | 21.1(fixed)                 | — | -10.6 | 21.1 |
| <i>u</i> <sub>2483</sub> | H(83)...H(112)  | 780.7(117) | 57.4(fixed)                 | — | -8.9  | 57.4 |
| <i>u</i> <sub>2599</sub> | H(18)...H(49)   | 781.3(67)  | 48.7(fixed)                 | — | -17.9 | 48.7 |
| <i>u</i> <sub>2528</sub> | H(71)...H(83)   | 781.4(40)  | 34.7(fixed)                 | — | -13.2 | 34.7 |
| <i>u</i> <sub>2494</sub> | H(140)...H(168) | 781.5(47)  | 49.9(fixed)                 | — | -3.1  | 49.9 |
| <i>u</i> <sub>2518</sub> | C(7)...H(41)    | 781.5(48)  | 52.3(fixed)                 | — | -7.2  | 52.3 |
| <i>u</i> <sub>2474</sub> | H(140)...C(171) | 781.9(68)  | 51.2(fixed)                 | — | -3.2  | 51.2 |
| <i>u</i> <sub>2607</sub> | C(19)...H(45)   | 781.9(92)  | 45.2(fixed)                 | — | -9.8  | 45.2 |
| <i>u</i> <sub>2534</sub> | H(137)...C(175) | 781.9(70)  | 56.1(fixed)                 | — | -2.9  | 56.1 |
| <i>u</i> <sub>2521</sub> | H(18)...H(21)   | 782.4(44)  | 44.4(fixed)                 | — | -11.7 | 44.4 |
| <i>u</i> <sub>2606</sub> | H(132)...C(159) | 782.6(66)  | 52.3(fixed)                 | — | -11.0 | 52.3 |
| <i>u</i> <sub>2452</sub> | H(140)...H(172) | 782.7(75)  | 69.8(fixed)                 | — | -1.5  | 69.8 |
| <i>u</i> <sub>2589</sub> | H(17)...H(40)   | 782.9(74)  | 54.5(fixed)                 | — | -8.5  | 54.5 |
| <i>u</i> <sub>2460</sub> | C(135)...H(161) | 783.9(90)  | 58.4(fixed)                 | — | -4.6  | 58.4 |
| <i>u</i> <sub>2345</sub> | H(76)...H(103)  | 784.2(111) | 76.1(fixed)                 | — | -0.7  | 76.1 |
| <i>u</i> <sub>2563</sub> | H(137)...C(167) | 784.3(71)  | 40.2(fixed)                 | — | -3.3  | 40.2 |
| <i>u</i> <sub>2551</sub> | H(16)...H(40)   | 784.7(88)  | 72.5(fixed)                 | — | -8.3  | 72.5 |
| <i>u</i> <sub>2548</sub> | H(71)...H(104)  | 785.0(106) | 55.7(fixed)                 | — | -3.0  | 55.7 |
| <i>u</i> <sub>2539</sub> | H(142)...C(143) | 785.2(23)  | 19.5(fixed)                 | — | -8.6  | 19.5 |
| <i>u</i> <sub>2547</sub> | C(139)...H(146) | 785.5(23)  | 19.7(fixed)                 | — | -9.3  | 19.7 |
| <i>u</i> <sub>2572</sub> | H(12)...H(42)   | 786.0(57)  | 51.8(fixed)                 | — | -3.8  | 51.8 |
| <i>u</i> <sub>2472</sub> | H(13)...H(52)   | 786.6(92)  | 77.6(fixed)                 | — | -5.2  | 77.6 |
| <i>u</i> <sub>2570</sub> | C(131)...C(171) | 786.7(51)  | 54.1(tied to <i>u</i> 1727) | — | -4.7  | 45.0 |
| <i>u</i> <sub>2448</sub> | H(26)...H(52)   | 786.8(103) | 82.5(fixed)                 | — | -8.8  | 82.5 |
| <i>u</i> <sub>2481</sub> | H(140)...H(169) | 787.2(61)  | 67.0(fixed)                 | — | -5.1  | 67.0 |
| <i>u</i> <sub>2580</sub> | H(88)...H(119)  | 787.3(39)  | 33.7(fixed)                 | — | -8.6  | 33.7 |
| <i>u</i> <sub>2515</sub> | C(135)...C(159) | 788.1(78)  | 50.4(tied to <i>u</i> 1727) | — | -8.1  | 41.8 |
| <i>u</i> <sub>2508</sub> | H(140)...C(167) | 788.2(47)  | 47.6(fixed)                 | — | -6.1  | 47.6 |
| <i>u</i> <sub>2583</sub> | C(77)...H(112)  | 788.4(89)  | 46.6(fixed)                 | — | -8.7  | 46.6 |
| <i>u</i> <sub>2562</sub> | C(135)...H(177) | 788.8(79)  | 63.3(fixed)                 | — | -4.7  | 63.3 |
| <i>u</i> <sub>2615</sub> | H(75)...H(115)  | 789.3(130) | 63.7(fixed)                 | — | -7.8  | 63.7 |
| <i>u</i> <sub>2578</sub> | C(135)...C(167) | 789.3(52)  | 27.7(tied to <i>u</i> 2627) | — | -5.9  | 27.4 |

|                          |                 |            |                                         |   |       |      |
|--------------------------|-----------------|------------|-----------------------------------------|---|-------|------|
| <i>u</i> <sub>2608</sub> | H(87)...H(121)  | 789.5(27)  | 35.0(fixed)                             | — | -9.2  | 35.0 |
| <i>u</i> <sub>2609</sub> | H(25)...H(59)   | 789.5(25)  | 36.0(fixed)                             | — | -10.6 | 36.0 |
| <i>u</i> <sub>2594</sub> | H(149)...H(176) | 789.8(75)  | 48.2(fixed)                             | — | -11.3 | 48.2 |
| <i>u</i> <sub>2560</sub> | H(71)...H(84)   | 790.1(65)  | 44.4(fixed)                             | — | -13.5 | 44.4 |
| <i>u</i> <sub>2425</sub> | H(138)...H(161) | 790.5(108) | 70.0(fixed)                             | — | -3.2  | 70.0 |
| <i>u</i> <sub>2612</sub> | H(137)...H(169) | 790.6(94)  | 62.1(fixed)                             | — | -5.6  | 62.1 |
| <i>u</i> <sub>2569</sub> | H(22)...H(59)   | 791.0(40)  | 35.6(fixed)                             | — | -10.2 | 35.6 |
| <i>u</i> <sub>2598</sub> | H(72)...H(102)  | 791.1(93)  | 56.0(fixed)                             | — | -5.3  | 56.0 |
| <i>u</i> <sub>2404</sub> | C(73)...H(103)  | 791.1(93)  | 61.3(fixed)                             | — | -3.3  | 61.3 |
| <i>u</i> <sub>2457</sub> | H(74)...H(104)  | 791.6(105) | 57.8(fixed)                             | — | 3.1   | 57.8 |
| <i>u</i> <sub>2393</sub> | H(88)...H(114)  | 791.9(88)  | 58.5(fixed)                             | — | -4.4  | 58.5 |
| <i>u</i> <sub>2624</sub> | C(131)...H(162) | 791.9(88)  | 52.7(fixed)                             | — | -10.6 | 52.7 |
| <i>u</i> <sub>2545</sub> | H(22)...H(49)   | 793.3(43)  | 73.9(fixed)                             | — | -0.9  | 73.9 |
| <i>u</i> <sub>2557</sub> | H(84)...H(121)  | 793.9(37)  | 34.4(fixed)                             | — | -10.6 | 34.4 |
| <i>u</i> <sub>2603</sub> | C(135)...H(169) | 794.1(73)  | 55.4(fixed)                             | — | -6.8  | 55.4 |
| <i>u</i> <sub>2640</sub> | C(73)...H(110)  | 794.6(86)  | 52.4(fixed)                             | — | -6.7  | 52.4 |
| <i>u</i> <sub>2579</sub> | C(77)...H(115)  | 794.6(61)  | 40.2(fixed)                             | — | -7.7  | 40.2 |
| <i>u</i> <sub>2519</sub> | H(78)...H(116)  | 795.1(83)  | 51.7(fixed)                             | — | -4.0  | 51.7 |
| <i>u</i> <sub>2567</sub> | H(16)...H(22)   | 795.6(34)  | 40.5(fixed)                             | — | -10.1 | 40.5 |
| <i>u</i> <sub>2645</sub> | H(20)...H(46)   | 797.7(128) | 58.9(fixed)                             | — | -8.3  | 58.9 |
| <i>u</i> <sub>2595</sub> | C(131)...H(177) | 797.9(60)  | 46.3(fixed)                             | — | -7.8  | 46.3 |
| <i>u</i> <sub>2590</sub> | H(80)...H(83)   | 798.3(38)  | 40.0(fixed)                             | — | -10.1 | 40.0 |
| <i>u</i> <sub>2610</sub> | H(76)...C(113)  | 798.6(92)  | 47.4(fixed)                             | — | -7.0  | 47.4 |
| <i>u</i> <sub>2593</sub> | H(74)...H(116)  | 798.8(151) | 59.9(fixed)                             | — | -0.9  | 59.9 |
| <i>u</i> <sub>2630</sub> | H(132)...H(172) | 799.2(92)  | 64.3(fixed)                             | — | -2.8  | 64.3 |
| <i>u</i> <sub>2621</sub> | H(75)...H(114)  | 799.5(126) | 66.0(fixed)                             | — | -4.3  | 66.0 |
| <i>u</i> <sub>2581</sub> | H(142)...H(145) | 799.9(38)  | 33.3(fixed)                             | — | -8.5  | 33.3 |
| <i>u</i> <sub>2522</sub> | H(14)...H(53)   | 800.6(96)  | 65.1(fixed)                             | — | -12.7 | 65.1 |
| <i>u</i> <sub>2511</sub> | H(87)...H(114)  | 801.1(107) | 56.3(fixed)                             | — | -11.9 | 56.3 |
| <i>u</i> <sub>2512</sub> | H(86)...H(114)  | 801.4(67)  | 50.9(fixed)                             | — | -12.1 | 50.9 |
| <i>u</i> <sub>2625</sub> | H(79)...H(84)   | 801.5(23)  | 32.9(fixed)                             | — | -13.7 | 32.9 |
| <i>u</i> <sub>2648</sub> | C(131)...H(158) | 801.7(73)  | 38.8(fixed)                             | — | -9.5  | 38.8 |
| <i>u</i> <sub>2550</sub> | H(24)...H(52)   | 802.2(93)  | 74.6(fixed)                             | — | -17.4 | 74.6 |
| <i>u</i> <sub>2635</sub> | H(8)...H(32)    | 804.1(86)  | 74.5(fixed)                             | — | -8.6  | 74.5 |
| <i>u</i> <sub>2618</sub> | H(17)...H(22)   | 804.5(26)  | 29.7(fixed)                             | — | -10.5 | 29.7 |
| <i>u</i> <sub>2665</sub> | H(21)...H(48)   | 804.6(52)  | 64.9(fixed)                             | — | -10.8 | 64.9 |
| <i>u</i> <sub>2626</sub> | C(15)...H(40)   | 804.7(70)  | 44.7(fixed)                             | — | -12.7 | 44.7 |
| <i>u</i> <sub>2596</sub> | H(8)...H(41)    | 805.3(60)  | 60.2(fixed)                             | — | -8.2  | 60.2 |
| <i>u</i> <sub>2554</sub> | H(71)...H(103)  | 805.4(113) | 62.5(fixed)                             | — | -2.6  | 62.5 |
| <i>u</i> <sub>2574</sub> | H(28)...H(59)   | 805.5(36)  | 40.8(fixed)                             | — | -11.9 | 40.8 |
| <i>u</i> <sub>2658</sub> | C(73)...C(109)  | 805.7(52)  | 36.7(tied to <i>u</i> <sub>2627</sub> ) | — | -9.4  | 36.3 |
| <i>u</i> <sub>2576</sub> | H(78)...C(113)  | 805.8(63)  | 43.4(fixed)                             | — | -8.2  | 43.4 |
| <i>u</i> <sub>2501</sub> | H(84)...H(112)  | 806.7(102) | 60.2(fixed)                             | — | -5.1  | 60.2 |
| <i>u</i> <sub>2611</sub> | H(141)...H(146) | 806.7(34)  | 30.4(fixed)                             | — | -9.2  | 30.4 |
| <i>u</i> <sub>2617</sub> | H(80)...H(82)   | 806.7(28)  | 31.1(fixed)                             | — | -9.8  | 31.1 |
| <i>u</i> <sub>2597</sub> | H(137)...H(177) | 807.0(98)  | 75.1(fixed)                             | — | -4.9  | 75.1 |



|                          |                 |            |                                         |          |       |      |
|--------------------------|-----------------|------------|-----------------------------------------|----------|-------|------|
| <i>u</i> <sub>2643</sub> | C(73)...H(115)  | 807.6(104) | 51.3(fixed)                             | —        | -10.4 | 51.3 |
| <i>u</i> <sub>2623</sub> | C(7)...H(36)    | 807.7(70)  | 46.1(fixed)                             | —        | -1.5  | 46.1 |
| <i>u</i> <sub>2613</sub> | H(78)...H(111)  | 807.9(82)  | 71.0(fixed)                             | —        | -9.8  | 71.0 |
| <i>u</i> <sub>2577</sub> | H(141)...H(174) | 808.1(60)  | 54.5(fixed)                             | —        | -4.8  | 54.5 |
| <i>u</i> <sub>2627</sub> | C(7)...C(35)    | 808.5(49)  | 34.0(33)                                | 33.6(34) | -5.9  | 33.7 |
| <i>u</i> <sub>2605</sub> | H(79)...H(114)  | 809.3(96)  | 49.2(fixed)                             | —        | -5.2  | 49.2 |
| <i>u</i> <sub>2681</sub> | H(133)...H(157) | 809.3(104) | 49.7(fixed)                             | —        | -10.6 | 49.7 |
| <i>u</i> <sub>2586</sub> | H(90)...H(121)  | 809.8(42)  | 36.9(fixed)                             | —        | -12.0 | 36.9 |
| <i>u</i> <sub>2634</sub> | H(18)...H(20)   | 810.3(24)  | 32.9(fixed)                             | —        | -16.2 | 32.9 |
| <i>u</i> <sub>2686</sub> | H(75)...H(110)  | 810.5(96)  | 64.9(fixed)                             | —        | -8.5  | 64.9 |
| <i>u</i> <sub>2641</sub> | H(72)...H(100)  | 810.7(54)  | 58.2(fixed)                             | —        | -1.9  | 58.2 |
| <i>u</i> <sub>2653</sub> | H(132)...C(171) | 810.9(69)  | 51.8(fixed)                             | —        | -6.4  | 51.8 |
| <i>u</i> <sub>2651</sub> | H(138)...C(167) | 811.2(60)  | 36.8(fixed)                             | —        | -7.2  | 36.8 |
| <i>u</i> <sub>2676</sub> | H(21)...H(45)   | 811.4(90)  | 54.1(fixed)                             | —        | -9.8  | 54.1 |
| <i>u</i> <sub>2685</sub> | H(75)...C(109)  | 812.1(67)  | 51.8(fixed)                             | —        | -8.9  | 51.8 |
| <i>u</i> <sub>2650</sub> | C(7)...H(32)    | 812.7(66)  | 53.6(fixed)                             | —        | -11.8 | 53.6 |
| <i>u</i> <sub>2631</sub> | H(140)...H(146) | 814.0(27)  | 31.0(fixed)                             | —        | -10.1 | 31.0 |
| <i>u</i> <sub>2663</sub> | H(136)...H(178) | 814.1(60)  | 55.7(fixed)                             | —        | -4.1  | 55.7 |
| <i>u</i> <sub>2628</sub> | H(132)...H(177) | 814.2(82)  | 54.9(fixed)                             | —        | -6.8  | 54.9 |
| <i>u</i> <sub>2565</sub> | H(80)...H(102)  | 814.4(151) | 53.5(fixed)                             | —        | -10.2 | 53.5 |
| <i>u</i> <sub>2644</sub> | H(14)...H(40)   | 814.5(71)  | 63.2(fixed)                             | —        | -7.1  | 63.2 |
| <i>u</i> <sub>2555</sub> | H(12)...H(53)   | 814.7(114) | 73.4(fixed)                             | —        | -13.0 | 73.4 |
| <i>u</i> <sub>2622</sub> | H(71)...C(101)  | 815.3(92)  | 43.7(fixed)                             | —        | -7.0  | 43.7 |
| <i>u</i> <sub>2568</sub> | H(141)...H(170) | 815.5(59)  | 55.0(fixed)                             | —        | -5.5  | 55.0 |
| <i>u</i> <sub>2639</sub> | H(134)...H(174) | 816.1(68)  | 70.8(fixed)                             | —        | -2.0  | 70.8 |
| <i>u</i> <sub>2585</sub> | H(75)...C(101)  | 816.4(63)  | 43.0(fixed)                             | —        | -6.7  | 43.0 |
| <i>u</i> <sub>2604</sub> | H(84)...H(110)  | 817.3(80)  | 49.9(fixed)                             | —        | -12.9 | 49.9 |
| <i>u</i> <sub>2636</sub> | H(142)...H(144) | 818.6(30)  | 27.6(fixed)                             | —        | -8.5  | 27.6 |
| <i>u</i> <sub>2661</sub> | C(19)...H(50)   | 819.7(49)  | 50.5(fixed)                             | —        | -11.4 | 50.5 |
| <i>u</i> <sub>2655</sub> | H(9)...H(42)    | 820.6(51)  | 42.2(fixed)                             | —        | -6.3  | 42.2 |
| <i>u</i> <sub>2642</sub> | H(22)...C(47)   | 821.1(38)  | 53.6(fixed)                             | —        | -9.1  | 53.6 |
| <i>u</i> <sub>2691</sub> | H(80)...H(111)  | 821.4(90)  | 64.7(fixed)                             | —        | -12.6 | 64.7 |
| <i>u</i> <sub>2652</sub> | H(141)...H(176) | 821.5(46)  | 43.7(fixed)                             | —        | -8.1  | 43.7 |
| <i>u</i> <sub>2654</sub> | C(147)...C(171) | 821.5(36)  | 23.0(tied to <i>u</i> <sub>2627</sub> ) | —        | -4.3  | 22.7 |
| <i>u</i> <sub>2573</sub> | H(12)...H(52)   | 821.6(91)  | 79.1(fixed)                             | —        | -8.1  | 79.1 |
| <i>u</i> <sub>2637</sub> | Si(65)...H(100) | 822.4(35)  | 24.8(fixed)                             | —        | -9.3  | 24.8 |
| <i>u</i> <sub>2660</sub> | C(7)...H(37)    | 822.8(55)  | 47.4(fixed)                             | —        | -6.4  | 47.4 |
| <i>u</i> <sub>2601</sub> | H(142)...H(169) | 822.9(63)  | 70.0(fixed)                             | —        | -4.6  | 70.0 |
| <i>u</i> <sub>2682</sub> | H(71)...H(95)   | 822.9(58)  | 45.5(fixed)                             | —        | -6.7  | 45.5 |
| <i>u</i> <sub>2646</sub> | H(134)...H(176) | 823.0(66)  | 58.9(fixed)                             | —        | -6.2  | 58.9 |
| <i>u</i> <sub>2670</sub> | C(131)...H(173) | 823.1(49)  | 51.1(fixed)                             | —        | -6.6  | 51.1 |
| <i>u</i> <sub>2678</sub> | H(142)...H(178) | 823.2(43)  | 46.6(fixed)                             | —        | -6.3  | 46.6 |
| <i>u</i> <sub>2690</sub> | C(19)...H(46)   | 824.9(101) | 43.1(fixed)                             | —        | -11.9 | 43.1 |
| <i>u</i> <sub>2702</sub> | C(131)...H(156) | 825.5(95)  | 37.6(fixed)                             | —        | -13.5 | 37.6 |
| <i>u</i> <sub>2669</sub> | C(11)...C(47)   | 825.8(27)  | 25.1(tied to <i>u</i> <sub>2627</sub> ) | —        | -11.2 | 24.8 |
| <i>u</i> <sub>2649</sub> | H(80)...H(116)  | 826.0(118) | 49.6(fixed)                             | —        | -6.4  | 49.6 |

|                          |                  |            |                                         |   |       |      |
|--------------------------|------------------|------------|-----------------------------------------|---|-------|------|
| <i>u</i> <sub>2659</sub> | H(133)...H(178)  | 826.0(73)  | 44.4(fixed)                             | — | -6.9  | 44.4 |
| <i>u</i> <sub>2664</sub> | Si(3)...H(38)    | 826.1(26)  | 22.5(fixed)                             | — | -11.1 | 22.5 |
| <i>u</i> <sub>2689</sub> | H(132)...H(160)  | 827.1(60)  | 65.9(fixed)                             | — | -13.4 | 65.9 |
| <i>u</i> <sub>2688</sub> | H(138)...H(169)  | 827.8(74)  | 55.7(fixed)                             | — | -9.7  | 55.7 |
| <i>u</i> <sub>2662</sub> | Si(127)...H(174) | 828.6(17)  | 24.7(fixed)                             | — | -11.2 | 24.7 |
| <i>u</i> <sub>2684</sub> | C(73)...H(114)   | 828.8(104) | 49.7(fixed)                             | — | -9.5  | 49.7 |
| <i>u</i> <sub>2673</sub> | C(69)...H(102)   | 829.0(75)  | 40.3(fixed)                             | — | -10.4 | 40.3 |
| <i>u</i> <sub>2677</sub> | Si(128)...H(162) | 830.3(13)  | 20.2(fixed)                             | — | -10.7 | 20.2 |
| <i>u</i> <sub>2633</sub> | H(142)...H(168)  | 831.5(49)  | 48.2(fixed)                             | — | -5.2  | 48.2 |
| <i>u</i> <sub>2683</sub> | H(80)...C(113)   | 832.0(88)  | 36.3(fixed)                             | — | -9.9  | 36.3 |
| <i>u</i> <sub>2638</sub> | H(14)...H(52)    | 835.0(70)  | 62.5(fixed)                             | — | -14.3 | 62.5 |
| <i>u</i> <sub>2671</sub> | C(77)...H(114)   | 835.3(84)  | 37.5(fixed)                             | — | -10.2 | 37.5 |
| <i>u</i> <sub>2620</sub> | H(136)...H(161)  | 835.8(106) | 68.1(fixed)                             | — | -5.1  | 68.1 |
| <i>u</i> <sub>2666</sub> | H(12)...H(41)    | 835.8(80)  | 71.8(fixed)                             | — | -9.5  | 71.8 |
| <i>u</i> <sub>2679</sub> | H(136)...H(168)  | 836.8(61)  | 41.1(fixed)                             | — | -3.6  | 41.1 |
| <i>u</i> <sub>2657</sub> | H(78)...H(115)   | 837.2(58)  | 53.5(fixed)                             | — | -8.4  | 53.5 |
| <i>u</i> <sub>2699</sub> | H(10)...H(40)    | 837.3(49)  | 51.2(fixed)                             | — | -9.4  | 51.2 |
| <i>u</i> <sub>2700</sub> | H(74)...C(113)   | 837.4(108) | 42.9(fixed)                             | — | -9.3  | 42.9 |
| <i>u</i> <sub>2667</sub> | C(23)...C(47)    | 837.9(54)  | 46.0(tied to <i>u</i> <sub>2627</sub> ) | — | -14.4 | 45.5 |
| <i>u</i> <sub>2692</sub> | H(133)...H(160)  | 838.2(72)  | 78.1(fixed)                             | — | -14.5 | 78.1 |
| <i>u</i> <sub>2701</sub> | C(11)...H(40)    | 838.4(54)  | 42.0(fixed)                             | — | -12.5 | 42.0 |
| <i>u</i> <sub>2696</sub> | H(8)...C(35)     | 839.2(67)  | 51.3(fixed)                             | — | -8.2  | 51.3 |
| <i>u</i> <sub>2715</sub> | C(11)...H(48)    | 839.7(58)  | 42.2(fixed)                             | — | -11.7 | 42.2 |
| <i>u</i> <sub>2668</sub> | C(85)...C(109)   | 840.3(29)  | 22.7(tied to <i>u</i> <sub>2627</sub> ) | — | -8.5  | 22.5 |
| <i>u</i> <sub>2698</sub> | H(8)...H(36)     | 840.6(92)  | 61.2(fixed)                             | — | -4.9  | 61.2 |
| <i>u</i> <sub>2695</sub> | H(12)...C(39)    | 841.8(54)  | 40.7(fixed)                             | — | -11.6 | 40.7 |
| <i>u</i> <sub>2656</sub> | H(142)...C(167)  | 841.9(45)  | 44.4(fixed)                             | — | -8.6  | 44.4 |
| <i>u</i> <sub>2703</sub> | H(76)...H(115)   | 841.9(101) | 59.7(fixed)                             | — | -10.6 | 59.7 |
| <i>u</i> <sub>2619</sub> | H(75)...H(103)   | 842.6(76)  | 60.7(fixed)                             | — | -9.1  | 60.7 |
| <i>u</i> <sub>2706</sub> | H(140)...H(176)  | 842.6(53)  | 46.7(fixed)                             | — | -10.5 | 46.7 |
| <i>u</i> <sub>2629</sub> | H(76)...H(102)   | 843.4(92)  | 62.1(fixed)                             | — | -4.7  | 62.1 |
| <i>u</i> <sub>2711</sub> | H(13)...H(40)    | 844.2(62)  | 54.6(fixed)                             | — | -10.2 | 54.6 |
| <i>u</i> <sub>2729</sub> | H(132)...H(158)  | 844.6(80)  | 46.2(fixed)                             | — | -10.4 | 46.2 |
| <i>u</i> <sub>2722</sub> | C(69)...H(94)    | 844.9(49)  | 31.7(fixed)                             | — | -10.7 | 31.7 |
| <i>u</i> <sub>2732</sub> | H(80)...H(112)   | 845.2(100) | 53.9(fixed)                             | — | -12.1 | 53.9 |
| <i>u</i> <sub>2675</sub> | C(23)...H(49)    | 845.4(83)  | 67.5(fixed)                             | — | -12.4 | 67.5 |
| <i>u</i> <sub>2707</sub> | H(71)...H(99)    | 845.5(57)  | 64.3(fixed)                             | — | -6.3  | 64.3 |
| <i>u</i> <sub>2704</sub> | H(132)...H(176)  | 845.6(84)  | 50.6(fixed)                             | — | -7.8  | 50.6 |
| <i>u</i> <sub>2708</sub> | C(139)...H(176)  | 845.8(36)  | 31.1(fixed)                             | — | -11.9 | 31.1 |
| <i>u</i> <sub>2737</sub> | H(70)...H(94)    | 845.9(73)  | 44.7(fixed)                             | — | -10.6 | 44.7 |
| <i>u</i> <sub>2705</sub> | C(131)...H(176)  | 847.0(57)  | 37.2(fixed)                             | — | -11.1 | 37.2 |
| <i>u</i> <sub>2730</sub> | H(133)...H(162)  | 847.5(108) | 66.7(fixed)                             | — | -14.0 | 66.7 |
| <i>u</i> <sub>2751</sub> | H(138)...H(176)  | 847.5(60)  | 59.0(fixed)                             | — | -10.4 | 59.0 |
| <i>u</i> <sub>2680</sub> | C(135)...H(162)  | 847.7(93)  | 49.8(fixed)                             | — | -10.7 | 49.8 |
| <i>u</i> <sub>2710</sub> | H(142)...C(175)  | 848.2(36)  | 31.6(fixed)                             | — | -10.3 | 31.6 |
| <i>u</i> <sub>2712</sub> | H(142)...H(177)  | 848.4(60)  | 51.2(fixed)                             | — | -8.8  | 51.2 |

|                          |                 |            |             |   |       |      |
|--------------------------|-----------------|------------|-------------|---|-------|------|
| <i>u</i> <sub>2742</sub> | H(74)...H(110)  | 848.7(98)  | 61.0(fixed) | — | -7.3  | 61.0 |
| <i>u</i> <sub>2674</sub> | H(137)...H(161) | 849.1(73)  | 55.3(fixed) | — | -10.9 | 55.3 |
| <i>u</i> <sub>2672</sub> | H(142)...H(172) | 849.4(59)  | 65.6(fixed) | — | -4.1  | 65.6 |
| <i>u</i> <sub>2713</sub> | C(147)...H(172) | 851.4(48)  | 30.9(fixed) | — | -4.7  | 30.9 |
| <i>u</i> <sub>2647</sub> | H(74)...C(101)  | 852.4(87)  | 43.5(fixed) | — | -6.0  | 43.5 |
| <i>u</i> <sub>2694</sub> | C(135)...H(160) | 853.2(63)  | 42.8(fixed) | — | -13.7 | 42.8 |
| <i>u</i> <sub>2744</sub> | H(76)...H(110)  | 853.3(74)  | 47.0(fixed) | — | -10.9 | 47.0 |
| <i>u</i> <sub>2719</sub> | H(10)...H(38)   | 853.4(67)  | 54.4(fixed) | — | -4.4  | 54.4 |
| <i>u</i> <sub>2724</sub> | C(7)...H(40)    | 853.5(39)  | 33.8(fixed) | — | -13.6 | 33.8 |
| <i>u</i> <sub>2687</sub> | C(139)...H(170) | 853.5(41)  | 40.6(fixed) | — | -11.3 | 40.6 |
| <i>u</i> <sub>2721</sub> | H(9)...C(39)    | 855.5(39)  | 30.7(fixed) | — | -13.5 | 30.7 |
| <i>u</i> <sub>2723</sub> | H(133)...H(172) | 855.9(75)  | 73.6(fixed) | — | -6.5  | 73.6 |
| <i>u</i> <sub>2745</sub> | H(132)...H(173) | 855.9(62)  | 54.9(fixed) | — | -9.2  | 54.9 |
| <i>u</i> <sub>2727</sub> | H(14)...C(47)   | 857.2(38)  | 33.2(fixed) | — | -13.0 | 33.2 |
| <i>u</i> <sub>2718</sub> | H(78)...H(112)  | 857.4(86)  | 58.6(fixed) | — | -15.7 | 58.6 |
| <i>u</i> <sub>2726</sub> | H(133)...C(175) | 858.9(50)  | 34.4(fixed) | — | -13.3 | 34.4 |
| <i>u</i> <sub>2725</sub> | H(18)...H(22)   | 859.3(25)  | 26.6(fixed) | — | -17.1 | 26.6 |
| <i>u</i> <sub>2731</sub> | H(80)...H(84)   | 859.4(22)  | 24.0(fixed) | — | -16.2 | 24.0 |
| <i>u</i> <sub>2716</sub> | H(14)...H(37)   | 860.8(92)  | 60.7(fixed) | — | 0.9   | 60.7 |
| <i>u</i> <sub>2747</sub> | H(26)...H(59)   | 861.1(23)  | 23.3(fixed) | — | -17.4 | 23.3 |
| <i>u</i> <sub>2759</sub> | H(14)...H(48)   | 861.3(70)  | 53.8(fixed) | — | -11.3 | 53.8 |
| <i>u</i> <sub>2758</sub> | H(76)...C(109)  | 861.4(44)  | 34.1(fixed) | — | -12.9 | 34.1 |
| <i>u</i> <sub>2735</sub> | H(8)...H(40)    | 861.6(57)  | 53.3(fixed) | — | -11.3 | 53.3 |
| <i>u</i> <sub>2697</sub> | H(25)...H(49)   | 862.5(115) | 85.7(fixed) | — | -12.6 | 85.7 |
| <i>u</i> <sub>2720</sub> | H(142)...H(146) | 862.5(30)  | 23.4(fixed) | — | -12.4 | 23.4 |
| <i>u</i> <sub>2693</sub> | C(73)...H(102)  | 862.6(76)  | 43.9(fixed) | — | -9.7  | 43.9 |
| <i>u</i> <sub>2748</sub> | H(71)...C(97)   | 862.8(43)  | 47.0(fixed) | — | -10.3 | 47.0 |
| <i>u</i> <sub>2714</sub> | H(142)...H(173) | 862.9(60)  | 54.6(fixed) | — | -6.6  | 54.6 |
| <i>u</i> <sub>2709</sub> | H(142)...C(171) | 863.2(51)  | 44.1(fixed) | — | -9.1  | 44.1 |
| <i>u</i> <sub>2768</sub> | C(73)...H(111)  | 863.2(40)  | 41.1(fixed) | — | -14.3 | 41.1 |
| <i>u</i> <sub>2773</sub> | H(21)...H(50)   | 863.2(66)  | 56.7(fixed) | — | -18.5 | 56.7 |
| <i>u</i> <sub>2740</sub> | H(8)...H(37)    | 863.3(62)  | 55.7(fixed) | — | -10.9 | 55.7 |
| <i>u</i> <sub>2632</sub> | H(74)...H(103)  | 863.5(107) | 65.0(fixed) | — | -4.9  | 65.0 |
| <i>u</i> <sub>2775</sub> | H(132)...H(162) | 864.0(78)  | 51.3(fixed) | — | -17.2 | 51.3 |
| <i>u</i> <sub>2763</sub> | C(135)...H(176) | 864.2(50)  | 44.3(fixed) | — | -12.9 | 44.3 |
| <i>u</i> <sub>2754</sub> | H(70)...H(102)  | 864.8(61)  | 46.2(fixed) | — | -14.0 | 46.2 |
| <i>u</i> <sub>2734</sub> | H(133)...H(170) | 865.4(69)  | 58.0(fixed) | — | -17.7 | 58.0 |
| <i>u</i> <sub>2753</sub> | C(69)...H(100)  | 866.0(43)  | 41.9(fixed) | — | -10.2 | 41.9 |
| <i>u</i> <sub>2752</sub> | H(137)...H(176) | 866.1(72)  | 60.3(fixed) | — | -10.3 | 60.3 |
| <i>u</i> <sub>2741</sub> | H(13)...C(47)   | 866.6(30)  | 31.3(fixed) | — | -12.2 | 31.3 |
| <i>u</i> <sub>2717</sub> | C(139)...H(174) | 866.7(47)  | 38.9(fixed) | — | -11.6 | 38.9 |
| <i>u</i> <sub>2743</sub> | H(22)...H(48)   | 867.6(28)  | 58.3(fixed) | — | -13.9 | 58.3 |
| <i>u</i> <sub>2749</sub> | H(88)...H(121)  | 868.3(20)  | 21.1(fixed) | — | -13.5 | 21.1 |
| <i>u</i> <sub>2783</sub> | H(74)...C(109)  | 868.4(62)  | 43.7(fixed) | — | -11.7 | 43.7 |
| <i>u</i> <sub>2738</sub> | C(147)...H(173) | 868.8(31)  | 28.7(fixed) | — | -5.4  | 28.7 |
| <i>u</i> <sub>2728</sub> | C(85)...H(111)  | 869.7(29)  | 32.0(fixed) | — | -10.4 | 32.0 |

|                          |                 |            |                                         |   |       |      |
|--------------------------|-----------------|------------|-----------------------------------------|---|-------|------|
| <i>u</i> <sub>2736</sub> | C(85)...H(110)  | 870.9(39)  | 30.4(fixed)                             | — | -10.6 | 30.4 |
| <i>u</i> <sub>2739</sub> | H(9)...H(41)    | 871.1(51)  | 55.3(fixed)                             | — | -13.5 | 55.3 |
| <i>u</i> <sub>2764</sub> | H(136)...C(175) | 871.2(46)  | 39.3(fixed)                             | — | -11.6 | 39.3 |
| <i>u</i> <sub>2788</sub> | H(21)...H(46)   | 871.7(92)  | 46.4(fixed)                             | — | -15.9 | 46.4 |
| <i>u</i> <sub>2778</sub> | H(71)...H(98)   | 872.0(58)  | 54.4(fixed)                             | — | -10.8 | 54.4 |
| <i>u</i> <sub>2794</sub> | H(75)...H(112)  | 872.7(74)  | 58.3(fixed)                             | — | -9.4  | 58.3 |
| <i>u</i> <sub>2756</sub> | C(131)...H(174) | 872.8(50)  | 47.9(fixed)                             | — | -11.0 | 47.9 |
| <i>u</i> <sub>2746</sub> | C(11)...H(37)   | 872.8(63)  | 46.2(fixed)                             | — | -4.7  | 46.2 |
| <i>u</i> <sub>2799</sub> | H(75)...H(111)  | 873.5(55)  | 50.4(fixed)                             | — | -14.5 | 50.4 |
| <i>u</i> <sub>2791</sub> | C(73)...H(112)  | 873.6(57)  | 40.9(fixed)                             | — | -11.8 | 40.9 |
| <i>u</i> <sub>2755</sub> | C(11)...H(49)   | 874.2(21)  | 32.9(fixed)                             | — | -13.7 | 32.9 |
| <i>u</i> <sub>2766</sub> | H(133)...C(171) | 876.6(54)  | 56.1(fixed)                             | — | -12.7 | 56.1 |
| <i>u</i> <sub>2760</sub> | C(11)...C(35)   | 877.2(40)  | 27.9(tied to <i>u</i> <sub>2627</sub> ) | — | -7.8  | 27.6 |
| <i>u</i> <sub>2806</sub> | H(70)...H(100)  | 877.4(69)  | 55.9(fixed)                             | — | -13.1 | 55.9 |
| <i>u</i> <sub>2777</sub> | H(137)...H(170) | 877.8(70)  | 43.7(fixed)                             | — | -10.5 | 43.7 |
| <i>u</i> <sub>2771</sub> | H(80)...H(115)  | 878.2(67)  | 41.2(fixed)                             | — | -13.8 | 41.2 |
| <i>u</i> <sub>2757</sub> | H(136)...H(169) | 878.5(70)  | 60.4(fixed)                             | — | -9.9  | 60.4 |
| <i>u</i> <sub>2762</sub> | C(147)...H(174) | 878.7(46)  | 29.4(fixed)                             | — | -6.7  | 29.4 |
| <i>u</i> <sub>2769</sub> | H(76)...H(114)  | 878.7(94)  | 53.9(fixed)                             | — | -13.7 | 53.9 |
| <i>u</i> <sub>2733</sub> | H(140)...H(174) | 879.1(65)  | 51.2(fixed)                             | — | -12.1 | 51.2 |
| <i>u</i> <sub>2761</sub> | H(136)...C(167) | 879.8(48)  | 31.0(fixed)                             | — | -10.7 | 31.0 |
| <i>u</i> <sub>2767</sub> | C(23)...H(48)   | 880.4(31)  | 39.4(fixed)                             | — | -18.6 | 39.4 |
| <i>u</i> <sub>2808</sub> | H(132)...H(156) | 882.9(76)  | 42.9(fixed)                             | — | -16.5 | 42.9 |
| <i>u</i> <sub>2782</sub> | H(136)...H(177) | 884.0(75)  | 62.0(fixed)                             | — | -11.7 | 62.0 |
| <i>u</i> <sub>2795</sub> | C(135)...H(170) | 886.1(50)  | 29.5(fixed)                             | — | -13.5 | 29.5 |
| <i>u</i> <sub>2750</sub> | H(140)...H(170) | 886.3(46)  | 48.0(fixed)                             | — | -13.0 | 48.0 |
| <i>u</i> <sub>2776</sub> | H(12)...C(47)   | 886.4(36)  | 33.1(fixed)                             | — | -13.2 | 33.1 |
| <i>u</i> <sub>2770</sub> | C(73)...C(97)   | 888.2(32)  | 21.4(tied to <i>u</i> <sub>2627</sub> ) | — | -10.5 | 21.2 |
| <i>u</i> <sub>2772</sub> | C(135)...C(171) | 888.6(17)  | 21.7(tied to <i>u</i> <sub>2627</sub> ) | — | -8.5  | 21.4 |
| <i>u</i> <sub>2781</sub> | C(11)...H(50)   | 888.9(30)  | 32.7(fixed)                             | — | -15.0 | 32.7 |
| <i>u</i> <sub>2803</sub> | H(132)...H(174) | 889.1(71)  | 55.1(fixed)                             | — | -11.0 | 55.1 |
| <i>u</i> <sub>2807</sub> | H(13)...H(48)   | 889.3(46)  | 40.1(fixed)                             | — | -14.9 | 40.1 |
| <i>u</i> <sub>2793</sub> | H(148)...H(172) | 889.6(62)  | 34.7(fixed)                             | — | -7.1  | 34.7 |
| <i>u</i> <sub>2774</sub> | H(148)...H(173) | 889.8(31)  | 38.4(fixed)                             | — | -3.5  | 38.4 |
| <i>u</i> <sub>2780</sub> | H(24)...H(49)   | 889.8(51)  | 57.4(fixed)                             | — | -17.6 | 57.4 |
| <i>u</i> <sub>2802</sub> | H(9)...H(36)    | 890.3(70)  | 54.2(fixed)                             | — | -9.4  | 54.2 |
| <i>u</i> <sub>2787</sub> | H(86)...H(111)  | 891.0(29)  | 42.5(fixed)                             | — | -10.5 | 42.5 |
| <i>u</i> <sub>2765</sub> | H(78)...H(114)  | 892.2(68)  | 45.2(fixed)                             | — | -14.8 | 45.2 |
| <i>u</i> <sub>2796</sub> | H(133)...H(177) | 892.3(57)  | 48.7(fixed)                             | — | -15.3 | 48.7 |
| <i>u</i> <sub>2786</sub> | H(138)...C(171) | 892.8(36)  | 37.4(fixed)                             | — | -6.6  | 37.4 |
| <i>u</i> <sub>2828</sub> | H(133)...H(156) | 894.3(114) | 43.5(fixed)                             | — | -18.0 | 43.5 |
| <i>u</i> <sub>2816</sub> | H(74)...H(115)  | 895.0(105) | 50.3(fixed)                             | — | -15.8 | 50.3 |
| <i>u</i> <sub>2809</sub> | H(9)...C(35)    | 895.1(50)  | 40.7(fixed)                             | — | -13.8 | 40.7 |
| <i>u</i> <sub>2805</sub> | H(86)...H(110)  | 898.5(49)  | 36.3(fixed)                             | — | -12.6 | 36.3 |
| <i>u</i> <sub>2800</sub> | H(22)...H(50)   | 898.6(48)  | 59.9(fixed)                             | — | -15.4 | 59.9 |
| <i>u</i> <sub>2820</sub> | H(12)...H(48)   | 899.1(71)  | 48.6(fixed)                             | — | -13.6 | 48.6 |

|                          |                 |            |             |   |       |      |
|--------------------------|-----------------|------------|-------------|---|-------|------|
| <i>u</i> <sub>2785</sub> | H(138)...H(173) | 899.3(59)  | 50.5(fixed) | — | -1.7  | 50.5 |
| <i>u</i> <sub>2810</sub> | C(7)...H(38)    | 899.9(46)  | 34.8(fixed) | — | -12.6 | 34.8 |
| <i>u</i> <sub>2789</sub> | H(136)...H(162) | 900.0(117) | 58.0(fixed) | — | -13.1 | 58.0 |
| <i>u</i> <sub>2792</sub> | C(73)...H(99)   | 901.5(39)  | 37.8(fixed) | — | -10.1 | 37.8 |
| <i>u</i> <sub>2815</sub> | H(14)...H(49)   | 902.4(30)  | 38.3(fixed) | — | -15.6 | 38.3 |
| <i>u</i> <sub>2801</sub> | C(135)...H(172) | 903.0(25)  | 38.9(fixed) | — | -7.7  | 38.9 |
| <i>u</i> <sub>2798</sub> | C(135)...H(173) | 903.5(35)  | 37.0(fixed) | — | -6.1  | 37.0 |
| <i>u</i> <sub>2823</sub> | H(9)...H(37)    | 904.7(59)  | 55.4(fixed) | — | -13.0 | 55.4 |
| <i>u</i> <sub>2830</sub> | H(18)...H(40)   | 904.7(69)  | 47.0(fixed) | — | -22.6 | 47.0 |
| <i>u</i> <sub>2790</sub> | H(75)...H(102)  | 904.9(63)  | 47.4(fixed) | — | -13.7 | 47.4 |
| <i>u</i> <sub>2831</sub> | H(22)...H(46)   | 905.0(104) | 47.9(fixed) | — | -15.7 | 47.9 |
| <i>u</i> <sub>2834</sub> | H(138)...H(170) | 905.1(58)  | 40.0(fixed) | — | -14.3 | 40.0 |
| <i>u</i> <sub>2819</sub> | H(80)...H(114)  | 906.9(100) | 42.4(fixed) | — | -13.8 | 42.4 |
| <i>u</i> <sub>2827</sub> | H(74)...H(114)  | 906.9(115) | 52.8(fixed) | — | -13.5 | 52.8 |
| <i>u</i> <sub>2811</sub> | H(13)...H(49)   | 907.0(42)  | 45.0(fixed) | — | -12.7 | 45.0 |
| <i>u</i> <sub>2813</sub> | H(87)...H(111)  | 907.1(39)  | 35.6(fixed) | — | -14.4 | 35.6 |
| <i>u</i> <sub>2817</sub> | C(11)...H(36)   | 907.5(41)  | 37.0(fixed) | — | -8.6  | 37.0 |
| <i>u</i> <sub>2797</sub> | C(23)...H(50)   | 908.1(60)  | 55.2(fixed) | — | -18.9 | 55.2 |
| <i>u</i> <sub>2829</sub> | C(73)...H(98)   | 908.3(51)  | 30.0(fixed) | — | -11.9 | 30.0 |
| <i>u</i> <sub>2779</sub> | H(25)...H(50)   | 908.5(92)  | 78.1(fixed) | — | -15.1 | 78.1 |
| <i>u</i> <sub>2832</sub> | H(133)...H(173) | 908.8(54)  | 61.1(fixed) | — | -13.9 | 61.1 |
| <i>u</i> <sub>2821</sub> | H(148)...H(174) | 909.0(61)  | 36.8(fixed) | — | -7.5  | 36.8 |
| <i>u</i> <sub>2804</sub> | H(137)...H(160) | 909.5(57)  | 44.7(fixed) | — | -17.9 | 44.7 |
| <i>u</i> <sub>2839</sub> | H(9)...H(32)    | 910.3(67)  | 55.7(fixed) | — | -22.2 | 55.7 |
| <i>u</i> <sub>2836</sub> | H(76)...H(111)  | 910.4(34)  | 42.1(fixed) | — | -15.7 | 42.1 |
| <i>u</i> <sub>2784</sub> | C(85)...H(112)  | 910.4(38)  | 28.9(fixed) | — | -9.3  | 28.9 |
| <i>u</i> <sub>2825</sub> | H(13)...H(37)   | 911.6(56)  | 50.7(fixed) | — | -7.9  | 50.7 |
| <i>u</i> <sub>2837</sub> | H(24)...H(48)   | 912.9(22)  | 40.8(fixed) | — | -20.5 | 40.8 |
| <i>u</i> <sub>2822</sub> | H(149)...H(173) | 914.1(37)  | 35.4(fixed) | — | -6.7  | 35.4 |
| <i>u</i> <sub>2824</sub> | H(137)...C(171) | 914.6(31)  | 33.6(fixed) | — | -9.5  | 33.6 |
| <i>u</i> <sub>2818</sub> | H(138)...H(172) | 916.2(34)  | 48.0(fixed) | — | -7.6  | 48.0 |
| <i>u</i> <sub>2826</sub> | H(71)...H(102)  | 916.8(90)  | 45.1(fixed) | — | -14.9 | 45.1 |
| <i>u</i> <sub>2849</sub> | H(75)...H(98)   | 917.7(83)  | 41.1(fixed) | — | -11.3 | 41.1 |
| <i>u</i> <sub>2814</sub> | H(136)...H(160) | 918.1(74)  | 50.7(fixed) | — | -17.5 | 50.7 |
| <i>u</i> <sub>2812</sub> | H(76)...H(99)   | 921.4(52)  | 47.3(fixed) | — | -10.7 | 47.3 |
| <i>u</i> <sub>2842</sub> | H(8)...H(38)    | 925.5(65)  | 54.1(fixed) | — | -13.3 | 54.1 |
| <i>u</i> <sub>2843</sub> | H(14)...H(50)   | 926.8(39)  | 37.9(fixed) | — | -18.7 | 37.9 |
| <i>u</i> <sub>2845</sub> | H(75)...H(99)   | 928.0(47)  | 40.5(fixed) | — | -12.8 | 40.5 |
| <i>u</i> <sub>2838</sub> | H(150)...H(174) | 928.1(59)  | 37.0(fixed) | — | -7.1  | 37.0 |
| <i>u</i> <sub>2840</sub> | H(13)...H(50)   | 930.3(36)  | 38.1(fixed) | — | -16.2 | 38.1 |
| <i>u</i> <sub>2856</sub> | H(74)...H(111)  | 930.6(50)  | 48.3(fixed) | — | -17.9 | 48.3 |
| <i>u</i> <sub>2844</sub> | H(137)...H(172) | 932.4(40)  | 41.9(fixed) | — | -9.6  | 41.9 |
| <i>u</i> <sub>2846</sub> | H(149)...H(174) | 932.6(39)  | 32.2(fixed) | — | -9.5  | 32.2 |
| <i>u</i> <sub>2860</sub> | H(74)...H(112)  | 932.6(68)  | 48.6(fixed) | — | -14.2 | 48.6 |
| <i>u</i> <sub>2855</sub> | H(76)...H(112)  | 935.0(48)  | 37.7(fixed) | — | -16.7 | 37.7 |
| <i>u</i> <sub>2854</sub> | H(12)...H(40)   | 935.3(54)  | 43.6(fixed) | — | -21.6 | 43.6 |

|                          |                 |            |             |   |       |      |
|--------------------------|-----------------|------------|-------------|---|-------|------|
| <i>u</i> <sub>2847</sub> | H(137)...H(173) | 938.1(40)  | 44.6(fixed) | — | -8.5  | 44.6 |
| <i>u</i> <sub>2835</sub> | H(87)...H(112)  | 939.1(40)  | 38.0(fixed) | — | -11.4 | 38.0 |
| <i>u</i> <sub>2853</sub> | H(13)...H(36)   | 940.7(54)  | 41.5(fixed) | — | -9.4  | 41.5 |
| <i>u</i> <sub>2852</sub> | H(12)...H(49)   | 941.9(24)  | 36.5(fixed) | — | -17.6 | 36.5 |
| <i>u</i> <sub>2850</sub> | H(12)...H(50)   | 942.4(41)  | 42.7(fixed) | — | -15.6 | 42.7 |
| <i>u</i> <sub>2841</sub> | H(142)...H(170) | 942.7(44)  | 46.2(fixed) | — | -16.8 | 46.2 |
| <i>u</i> <sub>2833</sub> | H(74)...H(102)  | 943.8(90)  | 48.2(fixed) | — | -14.0 | 48.2 |
| <i>u</i> <sub>2863</sub> | H(71)...H(94)   | 945.0(47)  | 33.3(fixed) | — | -17.1 | 33.3 |
| <i>u</i> <sub>2858</sub> | H(133)...H(176) | 945.8(53)  | 39.6(fixed) | — | -20.1 | 39.6 |
| <i>u</i> <sub>2861</sub> | H(142)...H(176) | 947.4(33)  | 32.2(fixed) | — | -18.2 | 32.2 |
| <i>u</i> <sub>2848</sub> | H(86)...H(112)  | 947.8(45)  | 33.0(fixed) | — | -13.2 | 33.0 |
| <i>u</i> <sub>2864</sub> | H(9)...H(40)    | 948.7(38)  | 33.9(fixed) | — | -22.5 | 33.9 |
| <i>u</i> <sub>2857</sub> | H(12)...H(37)   | 954.2(67)  | 49.6(fixed) | — | -10.0 | 49.6 |
| <i>u</i> <sub>2862</sub> | H(24)...H(50)   | 955.9(39)  | 47.6(fixed) | — | -24.7 | 47.6 |
| <i>u</i> <sub>2869</sub> | H(71)...H(100)  | 960.2(45)  | 47.0(fixed) | — | -16.3 | 47.0 |
| <i>u</i> <sub>2859</sub> | H(142)...H(174) | 960.4(48)  | 45.3(fixed) | — | -18.2 | 45.3 |
| <i>u</i> <sub>2866</sub> | C(11)...H(38)   | 961.8(39)  | 29.7(fixed) | — | -13.6 | 29.7 |
| <i>u</i> <sub>2871</sub> | H(133)...H(174) | 963.0(53)  | 58.8(fixed) | — | -20.0 | 58.8 |
| <i>u</i> <sub>2875</sub> | H(136)...H(176) | 963.0(46)  | 42.3(fixed) | — | -20.2 | 42.3 |
| <i>u</i> <sub>2868</sub> | C(73)...H(100)  | 971.8(31)  | 25.9(fixed) | — | -14.3 | 25.9 |
| <i>u</i> <sub>2870</sub> | H(136)...C(171) | 972.6(18)  | 25.0(fixed) | — | -13.5 | 25.0 |
| <i>u</i> <sub>2872</sub> | C(135)...H(174) | 973.2(17)  | 23.4(fixed) | — | -15.2 | 23.4 |
| <i>u</i> <sub>2851</sub> | H(88)...H(112)  | 975.1(51)  | 36.5(fixed) | — | -8.4  | 36.5 |
| <i>u</i> <sub>2865</sub> | H(26)...H(50)   | 975.5(67)  | 66.4(fixed) | — | -23.5 | 66.4 |
| <i>u</i> <sub>2874</sub> | H(138)...H(174) | 976.4(37)  | 39.4(fixed) | — | -13.6 | 39.4 |
| <i>u</i> <sub>2877</sub> | H(136)...H(170) | 977.7(47)  | 32.4(fixed) | — | -19.1 | 32.4 |
| <i>u</i> <sub>2867</sub> | H(74)...H(99)   | 978.0(43)  | 44.0(fixed) | — | -12.5 | 44.0 |
| <i>u</i> <sub>2873</sub> | H(136)...H(172) | 981.3(31)  | 44.7(fixed) | — | -11.1 | 44.7 |
| <i>u</i> <sub>2876</sub> | H(136)...H(173) | 985.2(36)  | 39.9(fixed) | — | -11.4 | 39.9 |
| <i>u</i> <sub>2878</sub> | H(12)...H(36)   | 987.4(37)  | 40.0(fixed) | — | -13.0 | 40.0 |
| <i>u</i> <sub>2881</sub> | H(9)...H(38)    | 988.2(47)  | 40.4(fixed) | — | -21.7 | 40.4 |
| <i>u</i> <sub>2880</sub> | H(74)...H(98)   | 993.4(45)  | 32.6(fixed) | — | -16.3 | 32.6 |
| <i>u</i> <sub>2879</sub> | H(137)...H(174) | 993.5(36)  | 37.1(fixed) | — | -14.7 | 37.1 |
| <i>u</i> <sub>2883</sub> | H(12)...H(38)   | 1048.8(41) | 31.2(fixed) | — | -20.8 | 31.2 |
| <i>u</i> <sub>2882</sub> | H(74)...H(100)  | 1056.7(36) | 30.0(fixed) | — | -18.8 | 30.0 |
| <i>u</i> <sub>2884</sub> | H(136)...H(174) | 1059.8(16) | 25.8(fixed) | — | -21.0 | 25.8 |



**Table S12** Final refined Cartesian coordinates (in pm) for the three conformers of **1** modelled for the GED refinement.

| <b>1a</b> |          |          |          | <b>1b</b> |          |          |          |
|-----------|----------|----------|----------|-----------|----------|----------|----------|
|           | <i>x</i> | <i>y</i> | <i>z</i> |           | <i>x</i> | <i>y</i> | <i>z</i> |
| Si(1)     | 118.71   | 0.00     | 0.00     | Si(57)    | 118.81   | 0.00     | 0.00     |
| Si(2)     | -118.71  | 0.00     | 0.00     | Si(58)    | -118.81  | 0.00     | 0.00     |
| Si(3)     | -226.56  | -90.05   | -190.14  | Si(59)    | -189.58  | -87.23   | -207.68  |
| Si(4)     | -201.79  | -84.68   | 204.73   | Si(60)    | -240.71  | -91.97   | 180.35   |
| Si(5)     | 226.56   | -194.05  | -81.28   | Si(61)    | 189.58   | 224.87   | -13.29   |
| Si(6)     | 201.79   | 200.66   | -93.92   | Si(62)    | 240.71   | -121.32  | 162.07   |
| C(7)      | -162.24  | -15.89   | -351.33  | C(63)     | -118.72  | -260.94  | -228.17  |
| H(8)      | -54.78   | -30.99   | -362.80  | H(64)     | -153.44  | -328.35  | -149.69  |
| H(9)      | -210.34  | -60.58   | -438.49  | H(65)     | -147.46  | -305.40  | -323.59  |
| H(10)     | -180.20  | 91.62    | -356.44  | H(66)     | -9.67    | -260.90  | -224.41  |
| C(11)     | -212.58  | -278.16  | -198.70  | C(67)     | -377.56  | -95.00   | -224.86  |
| H(12)     | -270.23  | -319.31  | -281.71  | H(68)     | -407.78  | -130.38  | -323.57  |
| H(13)     | -109.26  | -310.51  | -212.32  | H(69)     | -422.16  | -162.48  | -151.62  |
| H(14)     | -249.26  | -325.68  | -107.57  | H(70)     | -423.62  | 2.87     | -210.44  |
| C(15)     | -411.31  | -53.27   | -177.09  | C(71)     | -127.10  | 23.38    | -347.25  |
| H(16)     | -455.70  | -99.68   | -88.87   | H(72)     | -167.87  | 124.36   | -340.24  |
| H(17)     | -430.88  | 53.86    | -170.18  | H(73)     | -18.37   | 32.60    | -346.03  |
| H(18)     | -466.20  | -90.33   | -263.81  | H(74)     | -154.83  | -15.61   | -445.32  |
| C(19)     | -164.77  | 39.97    | 341.51   | C(75)     | -242.53  | 21.32    | 331.53   |
| H(20)     | -57.93   | 60.63    | 349.64   | H(76)     | -143.13  | 32.06    | 375.27   |
| H(21)     | -214.58  | 135.44   | 323.87   | H(77)     | -277.53  | 121.61   | 306.56   |
| H(22)     | -197.96  | 4.08     | 439.07   | H(78)     | -308.07  | -16.88   | 409.97   |
| C(23)     | -386.53  | -122.60  | 193.61   | C(79)     | -416.69  | -123.89  | 119.77   |
| H(24)     | -443.64  | -36.11   | 159.47   | H(80)     | -466.54  | -31.58   | 89.75    |
| H(25)     | -407.03  | -204.03  | 123.92   | H(81)     | -418.32  | -190.69  | 33.50    |
| H(26)     | -427.72  | -152.04  | 290.27   | H(82)     | -478.40  | -169.92  | 197.10   |
| C(27)     | -117.67  | -248.30  | 246.35   | C(83)     | -170.94  | -260.50  | 228.40   |
| H(28)     | -154.17  | -289.81  | 340.43   | H(84)     | -221.93  | -302.11  | 315.44   |
| H(29)     | -135.08  | -323.54  | 169.26   | H(85)     | -181.14  | -333.09  | 147.57   |
| H(30)     | -9.59    | -236.92  | 256.16   | H(86)     | -64.81   | -254.82  | 253.14   |
| C(31)     | 162.24   | -351.69  | 0.15     | C(87)     | 118.72   | 319.85   | 133.60   |
| H(32)     | 210.34   | -440.79  | -40.52   | H(88)     | 147.46   | 425.10   | 131.42   |
| H(33)     | 180.20   | -351.89  | 107.78   | H(89)     | 9.67     | 316.46   | 135.21   |
| H(34)     | 54.78    | -363.84  | -14.41   | H(90)     | 153.44   | 279.14   | 228.70   |
| C(35)     | 212.58   | -211.17  | -268.81  | C(91)     | 377.56   | 243.71   | -13.89   |
| H(36)     | 109.26   | -226.26  | -300.50  | H(92)     | 422.16   | 207.73   | 78.98    |
| H(37)     | 249.26   | -122.31  | -320.43  | H(93)     | 423.62   | 187.61   | -95.37   |
| H(38)     | 270.23   | -295.97  | -306.13  | H(94)     | 407.78   | 347.90   | -25.66   |
| C(39)     | 411.31   | -179.33  | -45.14   | C(95)     | 127.10   | 301.36   | -174.10  |



|       |         |         |         |        |         |         |         |
|-------|---------|---------|---------|--------|---------|---------|---------|
| H(40) | 466.20  | -267.66 | -78.20  | H(96)  | 154.83  | 406.58  | -182.35 |
| H(41) | 455.70  | -93.32  | -95.53  | H(97)  | 167.87  | 250.54  | -261.64 |
| H(42) | 430.88  | -167.55 | 61.56   | H(98)  | 18.37   | 296.20  | -181.84 |
| C(43) | 164.77  | 342.98  | 24.36   | C(99)  | 242.53  | -306.96 | 127.05  |
| H(44) | 57.93   | 352.05  | 44.62   | H(100) | 143.13  | -350.96 | 136.70  |
| H(45) | 214.58  | 329.70  | 120.53  | H(101) | 277.53  | -328.77 | 26.03   |
| H(46) | 197.96  | 438.80  | -15.94  | H(102) | 308.07  | -360.52 | 195.92  |
| C(47) | 386.53  | 187.81  | -131.30 | C(103) | 416.69  | -52.87  | 164.00  |
| H(48) | 443.64  | 157.66  | -43.34  | H(104) | 466.54  | -66.63  | 67.92   |
| H(49) | 407.03  | 114.49  | -209.47 | H(105) | 418.32  | 54.01   | 185.92  |
| H(50) | 427.72  | 283.04  | -165.12 | H(106) | 478.40  | -101.97 | 239.42  |
| C(51) | 117.67  | 234.77  | -259.27 | C(107) | 170.94  | -90.14  | 334.52  |
| H(52) | 154.17  | 326.86  | -305.03 | H(108) | 221.93  | -149.91 | 410.24  |
| H(53) | 135.08  | 154.33  | -330.92 | H(109) | 181.14  | 14.42   | 364.03  |
| H(54) | 9.59    | 245.09  | -248.35 | H(110) | 64.81   | -114.84 | 340.34  |
| H(55) | 160.04  | 6.58    | 144.23  | H(111) | 160.11  | -63.62  | -129.50 |
| H(56) | -160.04 | 144.38  | 0.00    | H(112) | -160.11 | 144.29  | 0.00    |

---

| <b>1c</b> |          |          |          |
|-----------|----------|----------|----------|
|           | <i>x</i> | <i>y</i> | <i>z</i> |
| Si(113)   | 118.71   | 0.00     | 0.00     |
| Si(114)   | -118.71  | 0.00     | 0.00     |
| Si(115)   | -208.58  | -87.47   | -200.41  |
| Si(116)   | -230.28  | -86.43   | 190.66   |
| Si(117)   | 208.58   | 110.03   | 188.97   |
| Si(118)   | 230.28   | -204.90  | -42.90   |
| C(119)    | -204.75  | -276.36  | -194.28  |
| H(120)    | -266.92  | -315.52  | -113.60  |
| H(121)    | -241.15  | -320.63  | -287.13  |
| H(122)    | -103.72  | -314.31  | -178.16  |
| C(123)    | -386.83  | -32.00   | -228.73  |
| H(124)    | -427.53  | -72.34   | -321.59  |
| H(125)    | -452.69  | -64.63   | -148.07  |
| H(126)    | -394.96  | 76.65    | -234.73  |
| C(127)    | -111.35  | -24.48   | -349.27  |
| H(128)    | -117.40  | 84.07    | -358.60  |
| H(129)    | -5.52    | -50.18   | -342.33  |
| H(130)    | -148.51  | -66.78   | -442.75  |
| C(131)    | -158.55  | -15.57   | 350.43   |
| H(132)    | -55.27   | -47.16   | 365.96   |
| H(133)    | -158.95  | 93.55    | 350.09   |
| H(134)    | -215.32  | -47.53   | 437.97   |
| C(135)    | -414.01  | -44.24   | 176.75   |

|        |         |         |         |
|--------|---------|---------|---------|
| H(136) | -430.11 | 62.99   | 164.52  |
| H(137) | -460.52 | -93.56  | 91.24   |
| H(138) | -469.46 | -75.03  | 265.54  |
| C(139) | -222.80 | -274.74 | 198.60  |
| H(140) | -276.94 | -313.82 | 284.91  |
| H(141) | -266.53 | -320.78 | 109.85  |
| H(142) | -120.13 | -310.91 | 206.14  |
| C(143) | 204.75  | -6.51   | 337.75  |
| H(144) | 241.15  | 42.26   | 428.33  |
| H(145) | 103.72  | -41.94  | 358.85  |
| H(146) | 266.92  | -94.73  | 321.69  |
| C(147) | 386.83  | 165.64  | 160.94  |
| H(148) | 452.69  | 81.29   | 139.62  |
| H(149) | 394.96  | 234.68  | 76.82   |
| H(150) | 427.53  | 216.74  | 248.35  |
| C(151) | 111.35  | 267.35  | 226.09  |
| H(152) | 148.51  | 317.78  | 315.43  |
| H(153) | 117.40  | 339.00  | 144.01  |
| H(154) | 5.52    | 246.57  | 242.72  |
| C(155) | 158.55  | -291.94 | -194.46 |
| H(156) | 55.27   | -323.14 | -178.14 |
| H(157) | 158.95  | -227.21 | -282.30 |
| H(158) | 215.32  | -381.46 | -220.39 |
| C(159) | 414.01  | -168.74 | -68.72  |
| H(160) | 430.11  | -95.53  | -148.02 |
| H(161) | 460.52  | -128.89 | 21.59   |
| H(162) | 469.46  | -258.58 | -96.33  |
| C(163) | 222.80  | -322.54 | 104.36  |
| H(164) | 276.94  | -415.27 | 84.89   |
| H(165) | 266.53  | -278.13 | 193.93  |
| H(166) | 120.13  | -350.00 | 129.08  |
| H(167) | 157.49  | 85.65   | -116.98 |
| H(168) | -157.49 | 144.99  | 0.00    |

---

**Table S13** Final refined Cartesian coordinates (in pm) for the three conformers of **2** modelled for the GED refinement.

| <b>2a</b> |          |          |          | <b>2b</b> |          |          |          |
|-----------|----------|----------|----------|-----------|----------|----------|----------|
|           | <i>x</i> | <i>y</i> | <i>z</i> |           | <i>x</i> | <i>y</i> | <i>z</i> |
| Si(1)     | -118.43  | 0.00     | 0.00     | Si(63)    | -118.53  | 0.00     | 0.00     |
| Si(2)     | 118.43   | 0.00     | 0.00     | Si(64)    | 118.53   | 0.00     | 0.00     |
| Si(3)     | 212.42   | 85.71    | 198.98   | Si(65)    | 206.93   | 168.07   | 140.90   |
| Si(4)     | 229.14   | -200.54  | -58.65   | Si(66)    | 226.91   | -205.74  | 41.20    |
| Si(5)     | -212.42  | -87.11   | -198.37  | Si(67)    | -206.93  | -86.68   | -201.46  |
| Si(6)     | -229.14  | -93.84   | 186.69   | Si(68)    | -226.91  | -98.56   | 185.24   |
| C(7)      | 209.42   | -41.23   | 337.69   | C(69)     | 125.55   | 175.02   | 309.95   |
| H(8)      | 268.51   | -130.63  | 312.97   | H(70)     | 136.26   | 80.24    | 364.73   |
| H(9)      | 250.46   | -0.80    | 431.39   | H(71)     | 169.09   | 253.59   | 373.41   |
| H(10)     | 107.33   | -75.62   | 359.84   | H(72)     | 17.77    | 195.78   | 302.95   |
| C(11)     | 390.66   | 137.08   | 168.07   | C(73)     | 391.82   | 144.91   | 166.95   |
| H(12)     | 437.60   | 179.16   | 258.19   | H(74)     | 436.54   | 229.11   | 221.78   |
| H(13)     | 453.03   | 52.24    | 136.30   | H(75)     | 414.21   | 53.91    | 224.50   |
| H(14)     | 398.41   | 213.56   | 89.41    | H(76)     | 446.09   | 136.52   | 71.65    |
| C(15)     | 126.89   | 243.29   | 255.70   | C(77)     | 189.48   | 335.73   | 57.53    |
| H(16)     | 138.23   | 324.83   | 182.77   | H(78)     | 245.11   | 340.58   | -37.23   |
| H(17)     | 18.91    | 228.51   | 270.46   | H(79)     | 84.64    | 359.40   | 34.19    |
| H(18)     | 167.37   | 280.04   | 351.14   | H(80)     | 227.24   | 417.33   | 120.87   |
| C(19)     | 199.84   | -248.25  | -238.17  | C(81)     | 150.07   | -352.56  | -47.28   |
| H(20)     | 95.45    | -277.67  | -256.44  | H(82)     | 44.95    | -367.51  | -18.60   |
| H(21)     | 222.10   | -165.36  | -306.96  | H(83)     | 151.86   | -340.31  | -156.57  |
| H(22)     | 262.72   | -333.04  | -269.03  | H(84)     | 202.89   | -446.39  | -24.86   |
| C(23)     | 414.54   | -176.63  | -36.45   | C(85)     | 404.33   | -191.27  | -19.74   |
| H(24)     | 451.81   | -89.55   | -92.34   | H(86)     | 409.21   | -167.45  | -127.00  |
| H(25)     | 441.69   | -160.85  | 68.96    | H(87)     | 459.66   | -112.20  | 33.01    |
| H(26)     | 471.78   | -263.81  | -71.40   | H(88)     | 460.59   | -284.65  | -5.24    |
| C(27)     | 182.77   | -346.10  | 50.33    | C(89)     | 236.40   | -243.93  | 224.98   |
| H(28)     | 236.94   | -437.57  | 22.11    | H(90)     | 297.27   | -333.22  | 245.39   |
| H(29)     | 205.39   | -327.07  | 156.27   | H(91)     | 281.11   | -161.17  | 281.97   |
| H(30)     | 75.47    | -369.48  | 44.35    | H(92)     | 137.05   | -262.48  | 268.36   |
| C(31)     | -209.42  | -275.13  | -200.09  | C(93)     | -125.55  | -246.62  | -256.67  |
| H(32)     | -250.46  | -316.11  | -293.55  | H(94)     | -169.09  | -284.83  | -350.16  |
| H(33)     | -107.33  | -314.78  | -190.03  | H(95)     | -17.77   | -233.95  | -274.54  |
| H(34)     | -268.51  | -318.01  | -117.84  | H(96)     | -136.26  | -326.31  | -181.62  |
| C(35)     | -390.66  | -29.48   | -214.86  | C(97)     | -391.82  | -118.29  | -186.76  |
| H(36)     | -453.03  | -64.08   | -131.15  | H(98)     | -414.21  | -199.56  | -116.12  |
| H(37)     | -398.41  | 80.21    | -217.18  | H(99)     | -446.09  | -29.42   | -151.35  |
| H(38)     | -437.60  | -66.70   | -307.10  | H(100)    | -436.54  | -146.63  | -283.16  |
| C(39)     | -126.89  | -21.17   | -352.31  | C(101)    | -189.48  | 41.33    | -338.11  |

|       |         |         |         |        |         |         |         |
|-------|---------|---------|---------|--------|---------|---------|---------|
| H(40) | -167.37 | -65.92  | -444.27 | H(102) | -227.24 | 4.10    | -434.47 |
| H(41) | -138.23 | 87.78   | -362.23 | H(103) | -245.11 | 133.48  | -315.54 |
| H(42) | -18.91  | -42.04  | -351.56 | H(104) | -84.64  | 70.48   | -354.07 |
| C(43) | -199.84 | 4.96    | 343.99  | C(105) | -150.07 | -55.98  | 351.28  |
| H(44) | -95.45  | -1.73   | 377.97  | H(106) | -44.95  | -87.74  | 357.37  |
| H(45) | -222.10 | 111.79  | 330.26  | H(107) | -151.86 | 52.22   | 370.95  |
| H(46) | -262.72 | -30.28  | 427.06  | H(108) | -202.89 | -104.41 | 434.72  |
| C(47) | -414.54 | -93.77  | 154.06  | C(109) | -404.33 | -36.03  | 188.88  |
| H(48) | -451.81 | 6.49    | 128.47  | H(110) | -409.21 | 73.56   | 196.87  |
| H(49) | -441.69 | -160.12 | 70.65   | H(111) | -459.66 | -63.85  | 97.99   |
| H(50) | -471.78 | -127.65 | 241.66  | H(112) | -460.59 | -76.74  | 274.16  |
| C(51) | -182.77 | -272.80 | 218.86  | C(113) | -236.40 | -285.56 | 169.02  |
| H(52) | -236.94 | -314.52 | 305.01  | H(114) | -297.27 | -330.76 | 248.70  |
| H(53) | -205.39 | -337.32 | 132.71  | H(115) | -281.11 | -316.38 | 73.38   |
| H(54) | -75.47  | -284.36 | 240.04  | H(116) | -137.05 | -332.45 | 174.34  |
| C(55) | -158.08 | 189.23  | 0.00    | C(117) | -166.42 | 187.42  | 0.00    |
| C(56) | 158.08  | 129.02  | -138.42 | C(118) | 166.42  | 53.83   | -179.52 |
| H(57) | -118.58 | 239.58  | 89.45   | H(119) | -133.29 | 238.38  | 91.66   |
| H(58) | -114.68 | 240.39  | -87.15  | H(120) | -121.38 | 241.43  | -84.56  |
| H(59) | -266.32 | 208.62  | -2.30   | H(121) | -275.19 | 202.12  | -7.10   |
| H(60) | 118.58  | 97.92   | -236.24 | H(122) | 133.29  | -19.32  | -254.66 |
| H(61) | 114.68  | 227.66  | -116.43 | H(123) | 121.38  | 150.34  | -206.96 |
| H(62) | 266.32  | 143.92  | -151.04 | H(124) | 275.19  | 64.85   | -191.57 |

---

**2c**

---

|         | <i>x</i> | <i>y</i> | <i>z</i> |
|---------|----------|----------|----------|
| Si(125) | -118.38  | 0.00     | 0.00     |
| Si(126) | 118.38   | 0.00     | 0.00     |
| Si(127) | 213.52   | 159.23   | -147.78  |
| Si(128) | 217.75   | 39.17    | 211.30   |
| Si(129) | -213.52  | -105.34  | -189.99  |
| Si(130) | -217.75  | -102.97  | 188.62   |
| C(131)  | 211.03   | 331.24   | -71.84   |
| H(132)  | 267.77   | 335.53   | 22.28    |
| H(133)  | 254.90   | 406.52   | -138.96  |
| H(134)  | 108.78   | 364.67   | -48.96   |
| C(135)  | 391.62   | 110.38   | -183.79  |
| H(136)  | 438.38   | 176.87   | -257.88  |
| H(137)  | 454.38   | 114.08   | -93.54   |
| H(138)  | 399.02   | 8.11     | -223.58  |
| C(139)  | 129.96   | 174.91   | -315.18  |
| H(140)  | 136.69   | 81.86    | -373.43  |
| H(141)  | 23.05    | 198.94   | -305.74  |

|        |         |         |         |
|--------|---------|---------|---------|
| H(142) | 175.17  | 254.24  | -376.50 |
| C(143) | 188.05  | -99.94  | 334.30  |
| H(144) | 81.95   | -108.42 | 362.03  |
| H(145) | 218.38  | -197.68 | 294.03  |
| H(146) | 244.30  | -85.08  | 427.64  |
| C(147) | 404.38  | 55.38   | 192.71  |
| H(148) | 448.93  | -33.42  | 145.53  |
| H(149) | 432.23  | 141.80  | 130.64  |
| H(150) | 454.45  | 68.40   | 289.77  |
| C(151) | 158.47  | 201.54  | 285.11  |
| H(152) | 198.62  | 217.92  | 386.18  |
| H(153) | 188.96  | 287.97  | 224.31  |
| H(154) | 48.86   | 205.43  | 293.34  |
| C(155) | -211.03 | -292.45 | -171.34 |
| H(156) | -254.90 | -343.11 | -258.55 |
| H(157) | -108.78 | -331.34 | -160.00 |
| H(158) | -267.77 | -325.80 | -83.23  |
| C(159) | -391.62 | -47.71  | -209.01 |
| H(160) | -454.38 | -79.31  | -124.40 |
| H(161) | -399.02 | 61.86   | -215.01 |
| H(162) | -438.38 | -87.85  | -300.11 |
| C(163) | -129.96 | -68.16  | -353.96 |
| H(164) | -175.17 | -124.47 | -436.91 |
| H(165) | -136.69 | 38.39   | -380.37 |
| H(166) | -23.05  | -93.94  | -352.47 |
| C(167) | -188.05 | -9.04   | 348.80  |
| H(168) | -81.95  | -9.61   | 377.79  |
| H(169) | -218.38 | 96.39   | 340.94  |
| H(170) | -244.30 | -52.20  | 432.88  |
| C(171) | -404.38 | -112.59 | 165.91  |
| H(172) | -448.93 | -13.52  | 148.70  |
| H(173) | -432.23 | -175.41 | 80.03   |
| H(174) | -454.45 | -155.17 | 254.10  |
| C(175) | -158.47 | -280.24 | 208.25  |
| H(176) | -198.62 | -327.26 | 299.21  |
| H(177) | -188.96 | -343.47 | 123.57  |
| H(178) | -48.86  | -286.51 | 214.86  |
| C(179) | -166.80 | 186.77  | 0.00    |
| C(180) | 166.80  | -177.50 | -58.11  |
| H(181) | -127.31 | 239.54  | 88.05   |
| H(182) | -128.24 | 239.30  | -88.60  |
| H(183) | -275.86 | 201.03  | 0.55    |
| H(184) | 127.31  | -255.04 | 9.15    |

|        |        |         |         |
|--------|--------|---------|---------|
| H(185) | 128.24 | -199.86 | -158.66 |
| H(186) | 275.86 | -191.22 | -62.02  |

**Figure S1** Variation in  $R_G/R_G(\text{min.})$  with different amounts of conformer **a** for (a) the refinement of **1**, and (b) for the refinement of **2**. The abundances of conformers **1c** and **2c** were fixed at 0.108 and 0.139, respectively. The horizontal line indicates the 95% confidence limit (approximately equal to  $2\sigma$ ).

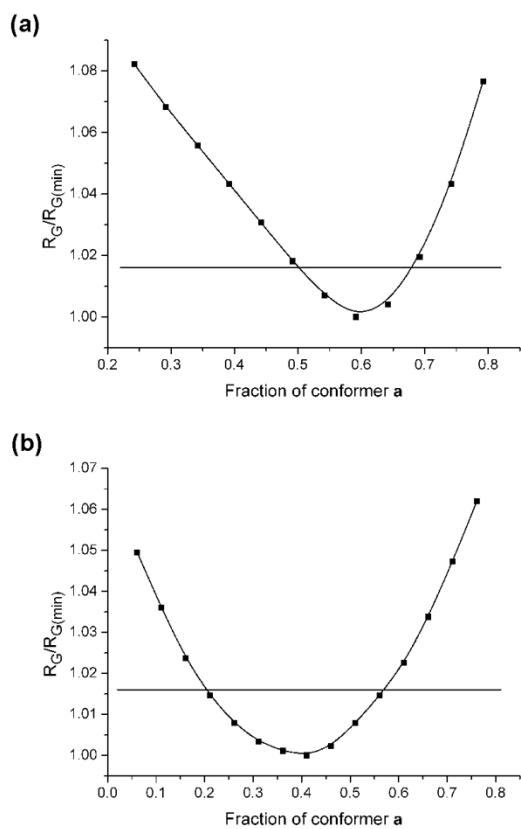

**Figure S2** Molecular scattering curves and difference curves between theoretical and experimental data for (a) **1**, and (b) **2**.

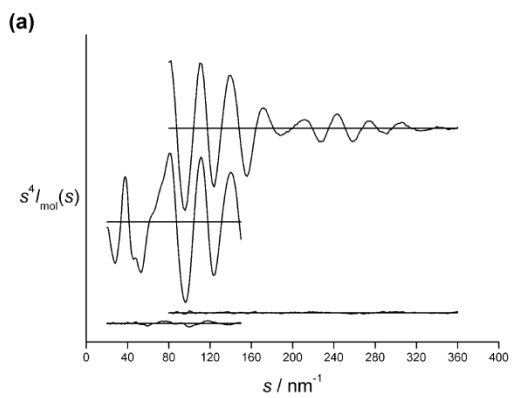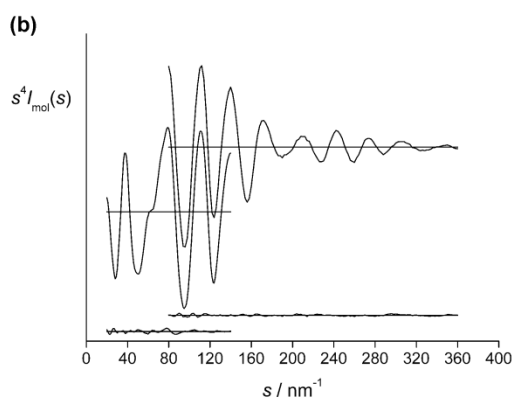

Supplement: c4dt00628c1.pdf [file c4dt00628c1.pdf]
